# Supplementary material for: Novel Prognostic Signature for Acute Myeloid Leukemia: Bioinformatics Analysis of Combined CNV-Driven and Ferroptosis-Related Genes
Source: Front Genet. 2022 Apr 26;13:849437. doi: 10.3389/fgene.2022.849437 (PMC9086455; doi:10.3389/fgene.2022.849437)
Supplement: Supplementary file 1 [file Table2.xlsx]

## Sheet: multiCox
Table 2. Multivariate Cox analysis.
	HR	HR.95L	HR.95H	p-value
Age	1.03132	1.0148	1.04811	0.00018162
Risk score	2.26714	1.47977	3.47347	0.000169704
