# Supplementary material for: Novel Prognostic Signature for Acute Myeloid Leukemia: Bioinformatics Analysis of Combined CNV-Driven and Ferroptosis-Related Genes
Source: Front Genet. 2022 Apr 26;13:849437. doi: 10.3389/fgene.2022.849437 (PMC9086455; doi:10.3389/fgene.2022.849437)
Supplement: Supplementary file 2 [file Table14.xlsx]

## Sheet: risk
Supplementary Table 12. Risk Group.
id	futime	fustat	DNAJB6	HSPB1	riskScore	risk
TCGA-AB-2919	0.167123	0	3.16192	3.56231	1.09795	high
TCGA-AB-2911	3.24932	0	3.51651	4.52526	1.04891	high
TCGA-AB-2996	4.33151	0	3.93215	4.50993	0.796112	low
TCGA-AB-2990	1.25205	0	3.30172	4.17011	1.12721	high
TCGA-AB-2984	3.16986	0	3.31124	4.61483	1.22124	high
TCGA-AB-2963	4.49863	1	2.92399	3.815	1.34807	high
TCGA-AB-2991	5.00274	0	5.03761	4.32261	0.371608	low
TCGA-AB-2898	1.07671	0	3.44876	4.21357	1.03218	high
TCGA-AB-2847	1.66575	1	4.33302	5.10324	0.686685	low
TCGA-AB-2874	1.08493	0	3.29077	3.28759	0.956499	low
TCGA-AB-2982	0.410959	0	4.19108	4.84658	0.717077	low
TCGA-AB-2884	2.00274	1	3.32535	3.28301	0.934203	low
TCGA-AB-2973	1.66849	1	2.77361	1.64289	0.975811	low
TCGA-AB-2914	2.16986	0	3.72852	4.69448	0.943149	low
TCGA-AB-2834	0.671233	1	2.8399	3.83462	1.43001	high
TCGA-AB-2935	0.167123	1	3.02155	5.62177	1.79598	high
TCGA-AB-2818	0.830137	1	3.40196	2.8664	0.819344	low
TCGA-AB-2822	2.66575	1	3.49835	3.64194	0.89414	low
TCGA-AB-2956	0.50137	1	3.12517	5.40756	1.60953	high
TCGA-AB-2867	0.50411	1	4.92879	1.81916	0.245439	low
TCGA-AB-2900	0.50411	1	3.54768	3.64681	0.866474	low
TCGA-AB-2928	0.161644	1	3.06204	5.44019	1.68828	high
TCGA-AB-2878	1	1	2.98334	5.32965	1.74002	high
TCGA-AB-3002	3.92055	1	5.28452	4.46422	0.324829	low
TCGA-AB-2843	0.589041	1	3.13525	4.89789	1.44822	high
TCGA-AB-2815	2.25205	1	3.16034	4.05257	1.20889	high
TCGA-AB-3001	4.33151	0	4.40662	4.19897	0.548918	low
TCGA-AB-2862	3.91781	0	3.58855	4.9942	1.09586	high
TCGA-AB-2830	0.753425	1	3.47339	5.19822	1.22967	high
TCGA-AB-2971	2.16986	1	3.78457	3.61118	0.7366	low
TCGA-AB-2812	1.00274	1	4.37064	3.26185	0.468509	low
TCGA-AB-2826	2.00274	1	2.6645	3.41851	1.4799	high
TCGA-AB-2986	0.580822	1	3.1721	5.01262	1.44548	high
TCGA-AB-2863	0.0849315	1	4.18278	3.41521	0.546011	low
TCGA-AB-2917	3.33151	0	3.43684	3.3621	0.881729	low
TCGA-AB-2894	0.49589	1	2.11214	3.89272	2.33168	high
TCGA-AB-2853	0.243836	1	3.41463	3.39486	0.900387	low
TCGA-AB-2839	1.33151	1	4.04025	4.65732	0.763122	low
TCGA-AB-2857	0.838356	1	3.3275	4.27754	1.13166	high
TCGA-AB-2856	0.410959	1	2.81315	5.167	1.88514	high
TCGA-AB-2959	1.33973	1	4.13398	4.17649	0.653617	low
TCGA-AB-2988	0.0821918	1	3.53636	4.17366	0.96699	low
TCGA-AB-2949	1.91507	0	4.13141	5.16876	0.793871	low
TCGA-AB-3007	4.33151	0	3.05078	4.84577	1.51536	high
TCGA-AB-2995	4.24932	0	3.69795	5.46199	1.11695	high
TCGA-AB-2938	0.832877	1	2.55878	5.76593	2.50243	high
TCGA-AB-2901	0.161644	0	3.71191	5.32449	1.0776	high
TCGA-AB-2876	3.33973	0	4.04784	1.48109	0.409754	low
TCGA-AB-2841	3.83836	1	3.35877	6.11876	1.58527	high
TCGA-AB-2877	1.74795	0	4.07753	1.77457	0.425418	low
TCGA-AB-2808	7.83836	0	4.06285	2.60323	0.504541	low
TCGA-AB-2865	0.167123	1	3.87677	6.17928	1.14173	high
TCGA-AB-2821	2.25205	1	4.22384	3.09811	0.499747	low
TCGA-AB-2934	0.0767123	0	3.06663	4.79732	1.48564	high
TCGA-AB-2819	6.83836	0	4.19122	6.11482	0.917275	low
TCGA-AB-2869	0.665753	0	3.36018	3.95212	1.03981	high
TCGA-AB-2933	0.334247	1	2.96785	3.68079	1.27612	high
TCGA-AB-2845	0.832877	1	3.50344	2.66925	0.737756	low
TCGA-AB-2835	4.58356	0	3.37916	3.87294	1.01126	low
TCGA-AB-2927	0.246575	1	4.45452	5.8393	0.731497	low
TCGA-AB-2977	0.0849315	1	2.58338	6.3411	2.75339	high
TCGA-AB-2858	1.58082	1	3.48282	4.67494	1.10399	high
TCGA-AB-2814	2.16986	1	3.64775	5.05453	1.06653	high
TCGA-AB-2939	1.24658	0	2.95605	3.36001	1.20837	high
TCGA-AB-2870	0.419178	1	3.46372	4.67617	1.11818	high
TCGA-AB-2912	0.750685	1	4.04122	4.21027	0.699217	low
TCGA-AB-2895	0.419178	1	3.71309	3.74015	0.791559	low
TCGA-AB-2846	3.8411	1	4.0502	4.16552	0.689088	low
TCGA-AB-2916	2.41644	0	3.17677	2.90087	0.956223	low
TCGA-AB-2966	2.33973	1	4.04542	2.73787	0.523866	low
TCGA-AB-2950	0.838356	0	4.22102	5.8459	0.853731	low
TCGA-AB-2892	2.58356	0	3.40452	4.65916	1.15865	high
TCGA-AB-3012	5.16986	0	4.75774	4.73362	0.483643	low
TCGA-AB-2813	0.0849315	1	3.62369	4.10445	0.900931	low
TCGA-AB-2881	1.07671	0	3.64577	5.22811	1.10452	high
TCGA-AB-2893	0.580822	1	3.03166	5.93895	1.89746	high
TCGA-AB-2965	0.917808	1	3.14152	3.96799	1.20397	high
TCGA-AB-2810	0.0849315	1	3.7048	3.71156	0.791469	low
TCGA-AB-2886	0.49589	0	3.71569	5.18667	1.04653	high
TCGA-AB-2849	6.08219	0	4.2031	3.55354	0.553449	low
TCGA-AB-2924	0.246575	0	3.35099	3.53086	0.963918	low
TCGA-AB-2871	0.419178	0	3.39138	3.64722	0.960156	low
TCGA-AB-2994	4.92603	0	4.2016	5.48695	0.806456	low
TCGA-AB-2875	0.580822	0	3.64958	4.93037	1.03987	high
TCGA-AB-2897	0.665753	0	4.42092	4.76503	0.606982	low
TCGA-AB-2851	0.663014	1	3.23336	4.28641	1.20586	high
TCGA-AB-2955	1.33973	1	4.35016	0.623047	0.284434	low
TCGA-AB-2948	1.58904	1	2.38162	4.16328	2.05912	high
TCGA-AB-2811	0.665753	1	3.55314	6.55652	1.51924	high
TCGA-AB-2983	0.917808	1	3.42327	5.27035	1.28872	high
TCGA-AB-2840	0.0767123	1	3.56683	4.22626	0.957577	low
TCGA-AB-2844	0.334247	1	3.39597	4.36242	1.09991	high
TCGA-AB-2929	0.336986	1	2.55527	4.98787	2.15645	high
TCGA-AB-2981	1.33425	0	3.43388	3.61247	0.927466	low
TCGA-AB-2998	0.0849315	1	3.45879	4.39973	1.06316	high
TCGA-AB-2908	0.0849315	1	3.79038	6.15183	1.20191	high
TCGA-AB-2836	1.41918	1	3.41817	3.77666	0.967439	low
TCGA-AB-2882	1	1	3.56002	3.82676	0.890061	low
TCGA-AB-2817	0.747945	1	2.43979	5.36112	2.50113	high
TCGA-AB-3009	1.58082	1	4.15729	5.31481	0.802957	low
TCGA-AB-3011	5.16438	0	4.74741	2.77855	0.333092	low
TCGA-AB-2976	2.50685	1	3.56424	3.44212	0.823703	low
TCGA-AB-2889	0.832877	0	3.2362	5.04641	1.39506	high
TCGA-AB-2806	2.58904	1	3.7013	4.98797	1.01647	low
TCGA-AB-2825	0.580822	1	3.13772	3.77647	1.1629	high
TCGA-AB-2937	0.589041	1	3.85783	5.5783	1.02866	low
TCGA-AB-2880	1.16164	1	4.13085	2.18506	0.44488	low
TCGA-AB-2979	1.83836	0	3.41097	3.22853	0.87386	low
TCGA-AB-2883	2	0	2.46244	5.15909	2.36941	high
TCGA-AB-3008	2.25205	1	4.08191	2.47295	0.48582	low
TCGA-AB-2913	3.33151	0	3.38257	3.90946	1.01619	low
TCGA-AB-2866	0.419178	1	3.08074	4.09309	1.28378	high
TCGA-AB-2805	1.58082	1	2.84611	3.13009	1.24206	high
TCGA-AB-3000	3.42192	0	3.4086	2.97859	0.833753	low
TCGA-AB-2987	0.50411	1	3.1019	4.62439	1.4037	high
TCGA-AB-2885	0.586301	1	2.98699	5.41325	1.76427	high
TCGA-AB-2942	1.75616	0	3.56144	4.40299	0.994525	low
TCGA-AB-2888	0.915068	0	3.20709	2.8997	0.93717	low
TCGA-AB-2980	1.91507	0	3.78179	4.00136	0.796039	low
TCGA-AB-2999	4.75342	0	3.4721	4.53593	1.08217	high
TCGA-AB-2992	4.67397	1	2.70684	3.05903	1.34229	high
TCGA-AB-2925	0.665753	1	2.81711	5.42476	1.97677	high
TCGA-AB-2872	1.74795	0	3.62584	4.24823	0.925137	low
TCGA-AB-2899	1.83836	1	3.06469	4.80353	1.48933	high
TCGA-AB-2859	0.832877	1	3.50379	4.87015	1.13098	high
TCGA-AB-2970	0.835616	1	3.21872	3.42434	1.02981	high
TCGA-AB-2952	0.0849315	1	2.28425	5.98492	3.12668	high
TCGA-AB-2920	1.00274	1	2.86206	6.73154	2.47381	high
TCGA-AB-2873	0.747945	0	3.28485	3.40627	0.982614	low
TCGA-AB-2896	0.586301	1	3.38253	4.2213	1.07966	high
TCGA-AB-2936	0.161644	0	3.76524	4.03888	0.810622	low
TCGA-AB-2828	6.25753	0	3.17069	3.5352	1.08592	high
