# Supplementary material for: Novel Prognostic Signature for Acute Myeloid Leukemia: Bioinformatics Analysis of Combined CNV-Driven and Ferroptosis-Related Genes
Source: Front Genet. 2022 Apr 26;13:849437. doi: 10.3389/fgene.2022.849437 (PMC9086455; doi:10.3389/fgene.2022.849437)
Supplement: Supplementary file 4 [file Table9.xlsx]

## Sheet: sheet 1
Supplementary Table 7. Chi square test significant genes
Gene	normalRatio	tumorRatio	Stat	Pvalue
A1CF	0	0.03	4.15446	0.0415249
AA06	0	0.05	8.17082	0.00425697
AACSP1	0.00507614	0.04	4.00075	0.0454799
AARD	0.035533	0.115	7.87015	0.00502575
AARSD1	0.00507614	0.06	7.79769	0.00523132
AATBC	0.0304569	0.095	5.95541	0.0146722
AATF	0.0203046	0.075	5.37042	0.020481
AB015752.3	0.0253807	0.115	10.8305	0.000998394
ABALON	0	0.04	6.14381	0.0131873
ABC12-46663800M24.1	0.035533	0.13	10.4142	0.00125047
ABC12-46663800M24.2	0.035533	0.13	10.4142	0.00125047
ABCA10	0	0.035	5.14356	0.0233328
ABCB1	0.0253807	0.105	9.01983	0.00267066
ABCB10	0.00507614	0.05	5.86061	0.0154834
ABCB4	0.0101523	0.085	10.6138	0.00112245
ABCB5	0.0152284	0.09	9.63302	0.0019111
ABCB8	0.0253807	0.12	11.7618	0.000604578
ABCC12	0	0.04	6.14381	0.0131873
ABCC13	0.0152284	0.08	7.77101	0.00530914
ABCC3	0.0152284	0.065	5.13461	0.0234533
ABCC9	0.00507614	0.04	4.00075	0.0454799
ABCF2	0.0304569	0.115	9.26468	0.00233615
ABCF2-H2BE1	0.0304569	0.115	9.26468	0.00233615
ABCG1	0.0253807	0.075	4.12306	0.0423026
ABHD11	0.0304569	0.09	5.19087	0.0227058
ABHD11-AS1	0.0304569	0.09	5.19087	0.0227058
ABHD14A	0	0.03	4.15446	0.0415249
ABHD14A-ACY1	0	0.03	4.15446	0.0415249
ABHD14B	0	0.03	4.15446	0.0415249
ABHD15	0	0.06	10.2275	0.00138363
ABHD15-AS1	0	0.06	10.2275	0.00138363
ABHD17AP4	0	0.045	7.15328	0.00748269
ABHD3	0	0.03	4.15446	0.0415249
ABLIM3	0.0304569	0.115	9.26468	0.00233615
ABR	0.0101523	0.08	9.63062	0.0019136
ABRAXAS2	0	0.035	5.14356	0.0233328
AC000035.3	0	0.04	6.14381	0.0131873
AC000041.8	0.00507614	0.05	5.86061	0.0154834
AC000067.1	0	0.045	7.15328	0.00748269
AC000068.10	0	0.045	7.15328	0.00748269
AC000068.5	0	0.045	7.15328	0.00748269
AC000068.9	0	0.045	7.15328	0.00748269
AC000077.2	0	0.045	7.15328	0.00748269
AC000078.5	0	0.045	7.15328	0.00748269
AC000081.2	0	0.045	7.15328	0.00748269
AC000082.4	0	0.045	7.15328	0.00748269
AC000085.4	0	0.045	7.15328	0.00748269
AC000089.3	0	0.045	7.15328	0.00748269
AC000095.12	0	0.045	7.15328	0.00748269
AC000095.9	0	0.045	7.15328	0.00748269
AC000111.5	0.035533	0.125	9.54611	0.00200373
AC000111.6	0.035533	0.125	9.54611	0.00200373
AC000120.7	0.0101523	0.1	13.6371	0.000221755
AC000123.2	0.0203046	0.105	10.6722	0.00108755
AC000123.3	0.0203046	0.105	10.6722	0.00108755
AC000123.4	0.0203046	0.105	10.6722	0.00108755
AC000124.1	0.0304569	0.13	11.9606	0.000543364
AC000362.1	0.0101523	0.105	14.6667	0.000128291
AC002064.4	0.0304569	0.11	8.40377	0.00374444
AC002064.5	0.0253807	0.105	9.01983	0.00267066
AC002064.7	0.0152284	0.105	12.5452	0.000397229
AC002066.1	0.0152284	0.11	13.5429	0.000233167
AC002075.3	0.0152284	0.085	8.69308	0.00319421
AC002075.4	0.0203046	0.085	7.0503	0.00792519
AC002117.1	0	0.05	8.17082	0.00425697
AC002127.4	0.0253807	0.095	7.28751	0.00694357
AC002386.1	0.0304569	0.105	7.56405	0.00595441
AC002429.4	0.0101523	0.1	13.6371	0.000221755
AC002451.3	0.0304569	0.105	7.56405	0.00595441
AC002456.2	0.00507614	0.09	13.8989	0.000192912
AC002463.3	0.0101523	0.105	14.6667	0.000128291
AC002467.7	0.035533	0.105	6.28441	0.0121805
AC002472.11	0	0.045	7.15328	0.00748269
AC002472.16	0	0.045	7.15328	0.00748269
AC002472.17	0	0.045	7.15328	0.00748269
AC002472.8	0	0.045	7.15328	0.00748269
AC002480.4	0.0101523	0.085	10.6138	0.00112245
AC002486.3	0.0101523	0.095	12.618	0.000382051
AC002539.1	0	0.035	5.14356	0.0233328
AC002542.2	0.0304569	0.115	9.26468	0.00233615
AC002543.2	0.0253807	0.115	10.8305	0.000998394
AC003075.4	0.0304569	0.085	4.45643	0.0347702
AC003084.2	0.0152284	0.105	12.5452	0.000397229
AC003090.1	0.0304569	0.085	4.45643	0.0347702
AC003092.1	0.0253807	0.105	9.01983	0.00267066
AC003092.2	0.0253807	0.095	7.28751	0.00694357
AC003101.1	0.0152284	0.065	5.13461	0.0234533
AC003958.2	0.00507614	0.05	5.86061	0.0154834
AC003958.6	0.0203046	0.07	4.57258	0.0324876
AC003984.1	0.00507614	0.08	11.8258	0.000584144
AC003985.1	0.0253807	0.085	5.64832	0.0174721
AC003988.1	0.0101523	0.07	7.70825	0.0054969
AC003989.3	0.0101523	0.105	14.6667	0.000128291
AC003989.4	0.0101523	0.105	14.6667	0.000128291
AC003991.3	0.0152284	0.085	8.69308	0.00319421
AC004006.2	0.00507614	0.08	11.8258	0.000584144
AC004009.1	0.0203046	0.08	6.19745	0.0127935
AC004009.2	0.0304569	0.095	5.95541	0.0146722
AC004009.3	0.0203046	0.08	6.19745	0.0127935
AC004012.1	0.0304569	0.11	8.40377	0.00374444
AC004014.3	0.0101523	0.105	14.6667	0.000128291
AC004054.1	0.00507614	0.04	4.00075	0.0454799
AC004112.4	0.0101523	0.105	14.6667	0.000128291
AC004129.7	0.0101523	0.085	10.6138	0.00112245
AC004129.9	0.0101523	0.085	10.6138	0.00112245
AC004158.3	0.00507614	0.045	4.91895	0.0265636
AC004231.2	0.0152284	0.06	4.30969	0.0378959
AC004237.1	0.0304569	0.1	6.74726	0.00938919
AC004448.5	0.00507614	0.065	8.78779	0.00303253
AC004461.4	0	0.045	7.15328	0.00748269
AC004471.10	0	0.045	7.15328	0.00748269
AC004471.9	0	0.045	7.15328	0.00748269
AC004485.3	0.0101523	0.075	8.66157	0.00324991
AC004535.2	0.0101523	0.09	11.61	0.000655997
AC004538.3	0.0253807	0.085	5.64832	0.0174721
AC004540.4	0.035533	0.1	5.5299	0.0186942
AC004540.5	0.035533	0.1	5.5299	0.0186942
AC004543.2	0.0101523	0.08	9.63062	0.0019136
AC004691.5	0.0253807	0.1	8.14306	0.00432262
AC004692.4	0.035533	0.09	4.10929	0.0426484
AC004775.5	0.0203046	0.11	11.6217	0.000651875
AC004800.1	0.0253807	0.085	5.64832	0.0174721
AC004837.5	0.0203046	0.08	6.19745	0.0127935
AC004862.6	0.00507614	0.065	8.78779	0.00303253
AC004869.2	0.0203046	0.075	5.37042	0.020481
AC004870.3	0.0152284	0.08	7.77101	0.00530914
AC004870.4	0.0101523	0.095	12.618	0.000382051
AC004878.2	0.00507614	0.07	9.78993	0.0017547
AC004878.8	0.00507614	0.07	9.78993	0.0017547
AC004895.4	0.0101523	0.07	7.70825	0.0054969
AC004899.3	0.00507614	0.09	13.8989	0.000192912
AC004901.1	0.0152284	0.08	7.77101	0.00530914
AC004920.3	0.0304569	0.09	5.19087	0.0227058
AC004938.5	0.035533	0.1	5.5299	0.0186942
AC004941.3	0.035533	0.125	9.54611	0.00200373
AC004945.1	0.0253807	0.09	6.45515	0.0110631
AC004947.2	0.035533	0.095	4.80396	0.0283944
AC004951.5	0.0101523	0.085	10.6138	0.00112245
AC004951.6	0.0101523	0.085	10.6138	0.00112245
AC004967.7	0.0203046	0.115	12.5862	0.000388614
AC004985.12	0.0152284	0.085	8.69308	0.00319421
AC005008.2	0.0101523	0.085	10.6138	0.00112245
AC005008.3	0.0101523	0.085	10.6138	0.00112245
AC005009.1	0.0101523	0.085	10.6138	0.00112245
AC005013.5	0.0152284	0.1	11.5603	0.000673751
AC005019.2	0.0101523	0.08	9.63062	0.0019136
AC005062.2	0.0304569	0.1	6.74726	0.00938919
AC005076.5	0.0152284	0.08	7.77101	0.00530914
AC005077.5	0.00507614	0.09	13.8989	0.000192912
AC005077.7	0.00507614	0.08	11.8258	0.000584144
AC005077.8	0.00507614	0.08	11.8258	0.000584144
AC005082.12	0.0253807	0.085	5.64832	0.0174721
AC005083.1	0.0152284	0.09	9.63302	0.0019111
AC005102.1	0.0152284	0.085	8.69308	0.00319421
AC005105.2	0.0152284	0.07	5.98897	0.0143956
AC005154.7	0.0304569	0.1	6.74726	0.00938919
AC005154.8	0.0304569	0.1	6.74726	0.00938919
AC005160.3	0.0101523	0.075	8.66157	0.00324991
AC005162.5	0.0101523	0.09	11.61	0.000655997
AC005178.1	0.00507614	0.09	13.8989	0.000192912
AC005276.1	0.0152284	0.105	12.5452	0.000397229
AC005281.1	0.035533	0.095	4.80396	0.0283944
AC005281.2	0.0203046	0.085	7.0503	0.00792519
AC005304.1	0.0101523	0.055	4.96579	0.0258534
AC005324.7	0.0253807	0.08	4.86983	0.0273302
AC005324.8	0.0253807	0.08	4.86983	0.0273302
AC005351.1	0.0253807	0.09	6.45515	0.0110631
AC005355.1	0.0253807	0.105	9.01983	0.00267066
AC005481.5	0.0304569	0.12	10.1453	0.00144669
AC005487.2	0.035533	0.13	10.4142	0.00125047
AC005488.11	0.0253807	0.075	4.12306	0.0423026
AC005518.2	0.0253807	0.12	11.7618	0.000604578
AC005532.5	0.0152284	0.08	7.77101	0.00530914
AC005537.2	0.035533	0.09	4.10929	0.0426484
AC005562.1	0.0253807	0.075	4.12306	0.0423026
AC005592.3	0.0101523	0.09	11.61	0.000655997
AC005592.4	0.0101523	0.085	10.6138	0.00112245
AC005609.16	0.0304569	0.115	9.26468	0.00233615
AC005609.19	0.0304569	0.115	9.26468	0.00233615
AC005609.2	0.0101523	0.105	14.6667	0.000128291
AC005609.20	0.0304569	0.115	9.26468	0.00233615
AC005613.1	0.0152284	0.085	8.69308	0.00319421
AC005618.6	0.00507614	0.095	14.9481	0.000110511
AC005618.8	0.0203046	0.105	10.6722	0.00108755
AC005618.9	0.0304569	0.115	9.26468	0.00233615
AC005682.6	0.0304569	0.095	5.95541	0.0146722
AC005703.2	0.0152284	0.07	5.98897	0.0143956
AC005740.3	0.0253807	0.095	7.28751	0.00694357
AC005740.4	0.0253807	0.105	9.01983	0.00267066
AC005740.5	0.0101523	0.09	11.61	0.000655997
AC005740.6	0.0152284	0.095	10.5892	0.0011375
AC005740.7	0.0304569	0.11	8.40377	0.00374444
AC005741.2	0.0152284	0.08	7.77101	0.00530914
AC005752.10	0.0203046	0.09	7.92627	0.00487222
AC005753.1	0.0304569	0.115	9.26468	0.00233615
AC005753.3	0.0304569	0.115	9.26468	0.00233615
AC005754.7	0.0304569	0.11	8.40377	0.00374444
AC005754.8	0.0304569	0.11	8.40377	0.00374444
AC005772.2	0.0152284	0.07	5.98897	0.0143956
AC005838.2	0.0152284	0.07	5.98897	0.0143956
AC005863.1	0.0152284	0.07	5.98897	0.0143956
AC005915.1	0.0152284	0.08	7.77101	0.00530914
AC006000.5	0.0152284	0.09	9.63302	0.0019111
AC006003.3	0.035533	0.14	12.2049	0.000476631
AC006014.7	0.00507614	0.07	9.78993	0.0017547
AC006014.8	0.00507614	0.07	9.78993	0.0017547
AC006022.4	0.0304569	0.09	5.19087	0.0227058
AC006026.12	0.0152284	0.07	5.98897	0.0143956
AC006041.1	0.0101523	0.07	7.70825	0.0054969
AC006042.6	0.0152284	0.09	9.63302	0.0019111
AC006042.8	0.0203046	0.095	8.8231	0.00297441
AC006050.2	0.0152284	0.075	6.86881	0.0087713
AC006077.3	0.00507614	0.095	14.9481	0.000110511
AC006159.5	0.0101523	0.1	13.6371	0.000221755
AC006195.2	0.0152284	0.085	8.69308	0.00319421
AC006326.3	0.0253807	0.11	9.91613	0.00163836
AC006372.4	0.035533	0.14	12.2049	0.000476631
AC006373.1	0.0304569	0.09	5.19087	0.0227058
AC006380.3	0.0304569	0.095	5.95541	0.0146722
AC006390.4	0.00507614	0.045	4.91895	0.0265636
AC006458.3	0.035533	0.09	4.10929	0.0426484
AC006466.5	0.0101523	0.07	7.70825	0.0054969
AC006547.13	0	0.045	7.15328	0.00748269
AC006547.15	0	0.045	7.15328	0.00748269
AC006547.8	0	0.045	7.15328	0.00748269
AC006548.26	0.0101523	0.05	4.10246	0.042821
AC006548.29	0	0.05	8.17082	0.00425697
AC006947.1	0.00507614	0.05	5.86061	0.0154834
AC006960.5	0.0304569	0.09	5.19087	0.0227058
AC006960.7	0.0152284	0.085	8.69308	0.00319421
AC007036.5	0.0152284	0.075	6.86881	0.0087713
AC007036.6	0.0101523	0.09	11.61	0.000655997
AC007050.17	0	0.045	7.15328	0.00748269
AC007161.5	0.0203046	0.075	5.37042	0.020481
AC007255.8	0.0101523	0.07	7.70825	0.0054969
AC007308.7	0	0.045	7.15328	0.00748269
AC007312.3	0.0203046	0.07	4.57258	0.0324876
AC007326.10	0	0.045	7.15328	0.00748269
AC007326.11	0	0.045	7.15328	0.00748269
AC007326.12	0	0.045	7.15328	0.00748269
AC007326.13	0	0.045	7.15328	0.00748269
AC007326.9	0	0.045	7.15328	0.00748269
AC007327.5	0.0304569	0.09	5.19087	0.0227058
AC007327.6	0.0304569	0.09	5.19087	0.0227058
AC007349.4	0.035533	0.095	4.80396	0.0283944
AC007349.5	0.035533	0.095	4.80396	0.0283944
AC007349.7	0.0203046	0.07	4.57258	0.0324876
AC007557.2	0	0.03	4.15446	0.0415249
AC007557.3	0	0.03	4.15446	0.0415249
AC007563.1	0	0.03	4.15446	0.0415249
AC007566.10	0.0304569	0.105	7.56405	0.00595441
AC007875.2	0.0203046	0.1	9.73895	0.00180404
AC008060.5	0.035533	0.14	12.2049	0.000476631
AC008060.7	0.035533	0.135	11.3009	0.000774713
AC008060.8	0.035533	0.14	12.2049	0.000476631
AC008103.4	0	0.045	7.15328	0.00748269
AC008132.13	0	0.045	7.15328	0.00748269
AC008132.14	0	0.045	7.15328	0.00748269
AC008154.4	0.0152284	0.11	13.5429	0.000233167
AC008154.5	0.0203046	0.12	13.5647	0.000230476
AC008155.2	0.0253807	0.11	9.91613	0.00163836
AC008264.4	0.0304569	0.105	7.56405	0.00595441
AC008592.4	0.00507614	0.075	10.8029	0.0010134
AC008592.5	0.00507614	0.07	9.78993	0.0017547
AC008592.7	0	0.07	12.3106	0.000450403
AC008592.8	0.0152284	0.075	6.86881	0.0087713
AC008694.2	0.00507614	0.075	10.8029	0.0010134
AC008694.3	0.0152284	0.08	7.77101	0.00530914
AC008697.1	0.00507614	0.06	7.79769	0.00523132
AC008781.7	0.0304569	0.095	5.95541	0.0146722
AC009262.2	0.035533	0.1	5.5299	0.0186942
AC009264.1	0.0253807	0.105	9.01983	0.00267066
AC009362.2	0.0253807	0.125	12.7089	0.000363912
AC009508.1	0.0152284	0.075	6.86881	0.0087713
AC009517.2	0.0253807	0.135	14.6471	0.000129635
AC009518.4	0.035533	0.13	10.4142	0.00125047
AC009531.2	0.0304569	0.085	4.45643	0.0347702
AC009542.2	0.0253807	0.125	12.7089	0.000363912
AC009784.3	0.035533	0.13	10.4142	0.00125047
AC010091.1	0.0101523	0.065	6.77266	0.0092565
AC010132.10	0.035533	0.09	4.10929	0.0426484
AC010132.11	0.035533	0.09	4.10929	0.0426484
AC010226.4	0.0101523	0.09	11.61	0.000655997
AC010240.2	0.0101523	0.09	11.61	0.000655997
AC010240.3	0.0152284	0.09	9.63302	0.0019111
AC010468.3	0.0101523	0.08	9.63062	0.0019136
AC010761.10	0.0101523	0.065	6.77266	0.0092565
AC010761.13	0	0.05	8.17082	0.00425697
AC010761.6	0.0101523	0.06	5.85737	0.0155119
AC010761.8	0.00507614	0.06	7.79769	0.00523132
AC010761.9	0.0101523	0.065	6.77266	0.0092565
AC011284.3	0.0203046	0.095	8.8231	0.00297441
AC011288.2	0.0203046	0.075	5.37042	0.020481
AC011290.4	0.0152284	0.09	9.63302	0.0019111
AC011290.5	0.0203046	0.095	8.8231	0.00297441
AC011294.3	0.0203046	0.07	4.57258	0.0324876
AC011380.8	0.0101523	0.105	14.6667	0.000128291
AC011406.2	0.0203046	0.115	12.5862	0.000388614
AC011625.1	0.0304569	0.12	10.1453	0.00144669
AC011718.3	0	0.045	7.15328	0.00748269
AC011899.10	0.0304569	0.14	13.8413	0.000198919
AC012613.2	0.0304569	0.115	9.26468	0.00233615
AC013248.2	0.0152284	0.07	5.98897	0.0143956
AC013429.4	0.035533	0.125	9.54611	0.00200373
AC013436.5	0.035533	0.1	5.5299	0.0186942
AC013470.8	0.0152284	0.08	7.77101	0.00530914
AC015849.16	0.0101523	0.085	10.6138	0.00112245
AC015922.7	0.0253807	0.08	4.86983	0.0273302
AC015987.1	0.0304569	0.125	11.0443	0.00088959
AC016292.3	0.0101523	0.07	7.70825	0.0054969
AC016717.1	0.00507614	0.04	4.00075	0.0454799
AC016831.5	0.0253807	0.105	9.01983	0.00267066
AC016831.6	0.0203046	0.11	11.6217	0.000651875
AC017104.6	0	0.03	4.15446	0.0415249
AC017116.11	0.0101523	0.09	11.61	0.000655997
AC018641.7	0.0253807	0.09	6.45515	0.0110631
AC018643.4	0.0304569	0.135	12.8932	0.000329772
AC018647.3	0.0101523	0.08	9.63062	0.0019136
AC019349.5	0.0152284	0.06	4.30969	0.0378959
AC020743.3	0.0253807	0.075	4.12306	0.0423026
AC020930.1	0.0203046	0.07	4.57258	0.0324876
AC020983.5	0.0253807	0.13	13.671	0.000217797
AC021218.2	0.0304569	0.14	13.8413	0.000198919
AC022182.1	0.0304569	0.13	11.9606	0.000543364
AC022182.3	0.0253807	0.13	13.671	0.000217797
AC022816.2	0.0152284	0.07	5.98897	0.0143956
AC023669.1	0.0152284	0.085	8.69308	0.00319421
AC024028.1	0.0253807	0.1	8.14306	0.00432262
AC024082.3	0.0203046	0.115	12.5862	0.000388614
AC024082.4	0.0203046	0.115	12.5862	0.000388614
AC024084.1	0.035533	0.13	10.4142	0.00125047
AC024619.2	0.0152284	0.07	5.98897	0.0143956
AC025442.4	0	0.035	5.14356	0.0233328
AC034228.2	0.0152284	0.09	9.63302	0.0019111
AC034228.4	0.0253807	0.095	7.28751	0.00694357
AC037445.1	0	0.04	6.14381	0.0131873
AC037459.4	0.0304569	0.125	11.0443	0.00088959
AC058791.1	0.035533	0.125	9.54611	0.00200373
AC060834.2	0.0304569	0.09	5.19087	0.0227058
AC060834.3	0.0253807	0.085	5.64832	0.0174721
AC063976.1	0.0101523	0.09	11.61	0.000655997
AC063976.2	0.0101523	0.09	11.61	0.000655997
AC063976.3	0.0101523	0.08	9.63062	0.0019136
AC063976.7	0.0101523	0.08	9.63062	0.0019136
AC068533.7	0.00507614	0.08	11.8258	0.000584144
AC068657.2	0.0152284	0.075	6.86881	0.0087713
AC072052.7	0.0101523	0.08	9.63062	0.0019136
AC073063.10	0.0101523	0.09	11.61	0.000655997
AC073071.1	0.0304569	0.125	11.0443	0.00088959
AC073072.7	0.0304569	0.105	7.56405	0.00595441
AC073115.6	0.0152284	0.085	8.69308	0.00319421
AC073115.7	0.0101523	0.09	11.61	0.000655997
AC073130.3	0.0152284	0.11	13.5429	0.000233167
AC073150.6	0.0152284	0.075	6.86881	0.0087713
AC073264.10	0.0203046	0.115	12.5862	0.000388614
AC073264.6	0.0203046	0.115	12.5862	0.000388614
AC073316.2	0.0304569	0.105	7.56405	0.00595441
AC073325.1	0.00507614	0.08	11.8258	0.000584144
AC073326.3	0.0101523	0.1	13.6371	0.000221755
AC073333.8	0.0152284	0.09	9.63302	0.0019111
AC073343.13	0.0253807	0.08	4.86983	0.0273302
AC073387.2	0.0203046	0.1	9.73895	0.00180404
AC073621.2	0.0152284	0.07	5.98897	0.0143956
AC073626.2	0.0203046	0.125	14.5566	0.000136012
AC073635.5	0.00507614	0.075	10.8029	0.0010134
AC073842.19	0.0253807	0.115	10.8305	0.000998394
AC073934.6	0.035533	0.14	12.2049	0.000476631
AC073957.15	0.035533	0.105	6.28441	0.0121805
AC074121.4	0.0304569	0.1	6.74726	0.00938919
AC074338.5	0.0152284	0.075	6.86881	0.0087713
AC074389.5	0.035533	0.1	5.5299	0.0186942
AC074389.7	0.035533	0.1	5.5299	0.0186942
AC078842.3	0.0152284	0.105	12.5452	0.000397229
AC079199.2	0.0101523	0.065	6.77266	0.0092565
AC079448.1	0.0101523	0.08	9.63062	0.0019136
AC079742.4	0.0304569	0.085	4.45643	0.0347702
AC079780.3	0.0203046	0.07	4.57258	0.0324876
AC079781.5	0.0203046	0.105	10.6722	0.00108755
AC079781.7	0.0203046	0.1	9.73895	0.00180404
AC079799.2	0.0203046	0.08	6.19745	0.0127935
AC083843.1	0.0253807	0.115	10.8305	0.000998394
AC083843.2	0.035533	0.13	10.4142	0.00125047
AC083843.4	0.0304569	0.11	8.40377	0.00374444
AC083863.5	0.0152284	0.075	6.86881	0.0087713
AC083864.3	0.035533	0.095	4.80396	0.0283944
AC083864.4	0.0101523	0.085	10.6138	0.00112245
AC083867.4	0.0203046	0.105	10.6722	0.00108755
AC083875.2	0.035533	0.135	11.3009	0.000774713
AC083884.8	0.00507614	0.07	9.78993	0.0017547
AC084082.3	0.0304569	0.13	11.9606	0.000543364
AC087163.2	0	0.07	12.3106	0.000450403
AC087491.2	0.0203046	0.07	4.57258	0.0324876
AC087501.1	0.0253807	0.075	4.12306	0.0423026
AC087650.1	0	0.04	6.14381	0.0131873
AC090286.2	0.00507614	0.06	7.79769	0.00523132
AC090453.1	0.0304569	0.115	9.26468	0.00233615
AC090616.2	0.0101523	0.055	4.96579	0.0258534
AC090617.1	0.0253807	0.08	4.86983	0.0273302
AC090625.1	0.00507614	0.04	4.00075	0.0454799
AC091132.1	0.00507614	0.045	4.91895	0.0265636
AC091133.1	0	0.04	6.14381	0.0131873
AC091153.4	0.0304569	0.09	5.19087	0.0227058
AC091177.1	0.00507614	0.065	8.78779	0.00303253
AC091705.1	0.0304569	0.1	6.74726	0.00938919
AC091729.7	0.035533	0.105	6.28441	0.0121805
AC091729.8	0.035533	0.105	6.28441	0.0121805
AC091770.3	0.00507614	0.065	8.78779	0.00303253
AC091801.1	0.0304569	0.105	7.56405	0.00595441
AC092013.1	0.0101523	0.08	9.63062	0.0019136
AC092171.4	0.0152284	0.085	8.69308	0.00319421
AC092628.3	0.0253807	0.12	11.7618	0.000604578
AC092657.2	0.0152284	0.085	8.69308	0.00319421
AC093106.4	0.0253807	0.13	13.671	0.000217797
AC093106.6	0.0253807	0.13	13.671	0.000217797
AC093673.5	0.0253807	0.115	10.8305	0.000998394
AC093716.1	0.0253807	0.075	4.12306	0.0423026
AC096582.8	0.0304569	0.085	4.45643	0.0347702
AC096582.9	0.0304569	0.085	4.45643	0.0347702
AC096775.2	0.0152284	0.1	11.5603	0.000673751
AC096921.2	0.00507614	0.04	4.00075	0.0454799
AC099342.1	0.0203046	0.1	9.73895	0.00180404
AC099552.3	0.0253807	0.13	13.671	0.000217797
AC099552.4	0.035533	0.135	11.3009	0.000774713
AC099684.1	0.0203046	0.085	7.0503	0.00792519
AC099850.1	0.00507614	0.045	4.91895	0.0265636
AC100802.3	0.0152284	0.1	11.5603	0.000673751
AC102953.4	0.035533	0.105	6.28441	0.0121805
AC102953.6	0.035533	0.1	5.5299	0.0186942
AC104843.3	0.0304569	0.115	9.26468	0.00233615
AC104843.4	0.0304569	0.12	10.1453	0.00144669
AC105443.2	0.035533	0.135	11.3009	0.000774713
AC106786.1	0.0101523	0.1	13.6371	0.000221755
AC106801.1	0	0.075	13.3615	0.000256841
AC107982.4	0	0.065	11.2658	0.000789467
AC109309.4	0	0.035	5.14356	0.0233328
AC110781.3	0.035533	0.105	6.28441	0.0121805
AC111155.1	0	0.03	4.15446	0.0415249
AC113167.2	0	0.06	10.2275	0.00138363
AC113189.5	0.0203046	0.095	8.8231	0.00297441
AC116366.7	0.0152284	0.1	11.5603	0.000673751
AC118653.2	0	0.03	4.15446	0.0415249
AC118754.4	0.0203046	0.07	4.57258	0.0324876
AC124789.1	0.00507614	0.055	6.82123	0.00900807
AC129492.6	0.0253807	0.085	5.64832	0.0174721
AC130689.5	0.0253807	0.08	4.86983	0.0273302
AC135178.7	0.0101523	0.07	7.70825	0.0054969
AC135721.3	0.00507614	0.055	6.82123	0.00900807
AC137675.1	0.00507614	0.04	4.00075	0.0454799
AC138517.5	0.0101523	0.085	10.6138	0.00112245
AC138647.1	0.035533	0.135	11.3009	0.000774713
AC142391.3	0.0203046	0.085	7.0503	0.00792519
AC142472.6	0	0.05	8.17082	0.00425697
AC145123.2	0.035533	0.135	11.3009	0.000774713
AC145343.2	0	0.045	7.15328	0.00748269
ACACA	0.0101523	0.06	5.85737	0.0155119
ACADM	0.0101523	0.06	5.85737	0.0155119
ACADVL	0.0101523	0.095	12.618	0.000382051
ACAP1	0.0203046	0.095	8.8231	0.00297441
ACBD3	0	0.035	5.14356	0.0233328
ACBD3-AS1	0	0.035	5.14356	0.0233328
ACBD4	0	0.05	8.17082	0.00425697
ACCSL	0.0101523	0.05	4.10246	0.042821
ACE	0.00507614	0.05	5.86061	0.0154834
ACE3P	0	0.045	7.15328	0.00748269
ACER3	0.00507614	0.055	6.82123	0.00900807
ACHE	0.0253807	0.11	9.91613	0.00163836
ACLY	0	0.065	11.2658	0.000789467
ACO2	0.00507614	0.045	4.91895	0.0265636
ACOT12	0.0152284	0.065	5.13461	0.0234533
ACRV1	0.0101523	0.055	4.96579	0.0258534
ACSL6	0.0253807	0.1	8.14306	0.00432262
ACSL6-AS1	0.0152284	0.09	9.63302	0.0019111
ACTA1	0.00507614	0.05	5.86061	0.0154834
ACTA2	0	0.035	5.14356	0.0233328
ACTA2-AS1	0	0.035	5.14356	0.0233328
ACTB	0.0152284	0.085	8.69308	0.00319421
ACTBP4	0.0203046	0.08	6.19745	0.0127935
ACTG1P20	0	0.03	4.15446	0.0415249
ACTL6B	0.0203046	0.115	12.5862	0.000388614
ACTN3	0	0.035	5.14356	0.0233328
ACTR3B	0.0253807	0.12	11.7618	0.000604578
ACTR3C	0.035533	0.125	9.54611	0.00200373
ACY1	0	0.03	4.15446	0.0415249
ADA2	0.0101523	0.06	5.85737	0.0155119
ADAD1	0	0.035	5.14356	0.0233328
ADAM18	0.0253807	0.11	9.91613	0.00163836
ADAM19	0	0.07	12.3106	0.000450403
ADAM22	0.00507614	0.095	14.9481	0.000110511
ADAM32	0.0253807	0.125	12.7089	0.000363912
ADAM3A	0.0253807	0.095	7.28751	0.00694357
ADAM5	0.0304569	0.1	6.74726	0.00938919
ADAM7	0.0304569	0.105	7.56405	0.00595441
ADAM9	0.0304569	0.12	10.1453	0.00144669
ADAMTS1	0.0101523	0.07	7.70825	0.0054969
ADAMTS15	0.0253807	0.075	4.12306	0.0423026
ADAMTS19	0.0253807	0.085	5.64832	0.0174721
ADAMTS19-AS1	0.0203046	0.105	10.6722	0.00108755
ADAMTS5	0.0152284	0.075	6.86881	0.0087713
ADAMTS6	0.00507614	0.04	4.00075	0.0454799
ADAP1	0.035533	0.105	6.28441	0.0121805
ADAP2	0.00507614	0.075	10.8029	0.0010134
ADARB1	0.0101523	0.085	10.6138	0.00112245
ADCY1	0.035533	0.09	4.10929	0.0426484
ADCY8	0.035533	0.14	12.2049	0.000476631
ADCYAP1R1	0.0152284	0.085	8.69308	0.00319421
ADGRA2	0.0253807	0.11	9.91613	0.00163836
ADGRB1	0.035533	0.135	11.3009	0.000774713
ADGRB2	0	0.04	6.14381	0.0131873
ADGRL2	0.00507614	0.04	4.00075	0.0454799
ADIPOR1	0.00507614	0.045	4.91895	0.0265636
ADORA2B	0.0253807	0.08	4.86983	0.0273302
ADPRM	0.0253807	0.075	4.12306	0.0423026
ADPRS	0.0101523	0.055	4.96579	0.0258534
ADRA1A	0.0101523	0.1	13.6371	0.000221755
ADRA1B	0.0253807	0.08	4.86983	0.0273302
ADRB2	0.0101523	0.1	13.6371	0.000221755
ADSL	0	0.035	5.14356	0.0233328
AEBP1	0.00507614	0.085	12.858	0.000336037
AF015262.2	0.0101523	0.05	4.10246	0.042821
AF064858.10	0.0101523	0.075	8.66157	0.00324991
AF064858.6	0.0152284	0.07	5.98897	0.0143956
AF064858.8	0.0101523	0.08	9.63062	0.0019136
AF064858.9	0.0101523	0.075	8.66157	0.00324991
AF064860.5	0.035533	0.095	4.80396	0.0283944
AF064860.7	0.0152284	0.07	5.98897	0.0143956
AF064866.1	0.0101523	0.09	11.61	0.000655997
AF096876.1	0.0203046	0.085	7.0503	0.00792519
AF127577.10	0	0.07	12.3106	0.000450403
AF127577.11	0	0.07	12.3106	0.000450403
AF127577.13	0.0203046	0.07	4.57258	0.0324876
AF127936.3	0.0101523	0.065	6.77266	0.0092565
AF127936.9	0.0101523	0.07	7.70825	0.0054969
AF129408.17	0.0304569	0.1	6.74726	0.00938919
AF130248.1	0.00507614	0.075	10.8029	0.0010134
AF131215.2	0.0152284	0.115	14.5528	0.000136286
AF131215.4	0.0203046	0.12	13.5647	0.000230476
AF131215.9	0.0152284	0.115	14.5528	0.000136286
AF131216.7	0.0101523	0.105	14.6667	0.000128291
AF131217.1	0.0203046	0.075	5.37042	0.020481
AF212831.2	0.0152284	0.07	5.98897	0.0143956
AF222684.1	0	0.08	14.4186	0.000146349
AF222685.1	0.0203046	0.085	7.0503	0.00792519
AF240627.2	0.00507614	0.055	6.82123	0.00900807
AF241725.4	0	0.055	9.19571	0.00242583
AF241725.6	0	0.055	9.19571	0.00242583
AF246928.1	0.00507614	0.065	8.78779	0.00303253
AFAP1L1	0.0304569	0.115	9.26468	0.00233615
AFF4	0.0304569	0.11	8.40377	0.00374444
AGAP3	0.0253807	0.12	11.7618	0.000604578
AGBL3	0.0203046	0.115	12.5862	0.000388614
AGFG1	0	0.03	4.15446	0.0415249
AGFG2	0.0304569	0.115	9.26468	0.00233615
AGK	0.0152284	0.115	14.5528	0.000136286
AGK-DT	0.0203046	0.125	14.5566	0.000136012
AGMO	0.0253807	0.075	4.12306	0.0423026
AGO1	0	0.05	8.17082	0.00425697
AGO2	0.0304569	0.115	9.26468	0.00233615
AGO3	0.0101523	0.055	4.96579	0.0258534
AGPAT3	0.0304569	0.09	5.19087	0.0227058
AGPAT5	0.0203046	0.115	12.5862	0.000388614
AGR2	0.035533	0.09	4.10929	0.0426484
AGR3	0.0253807	0.085	5.64832	0.0174721
AHCTF1	0.00507614	0.04	4.00075	0.0454799
AHCYL2	0.0304569	0.13	11.9606	0.000543364
AHR	0.0203046	0.075	5.37042	0.020481
AIDA	0.00507614	0.045	4.91895	0.0265636
AIFM3	0	0.045	7.15328	0.00748269
AIPL1	0	0.07	12.3106	0.000450403
AIRE	0.035533	0.09	4.10929	0.0426484
AJ006998.2	0.0203046	0.075	5.37042	0.020481
AJ011931.1	0.0101523	0.085	10.6138	0.00112245
AJ011931.2	0.0101523	0.08	9.63062	0.0019136
AJ011932.1	0.035533	0.09	4.10929	0.0426484
AJUBA	0	0.035	5.14356	0.0233328
AK2	0	0.05	8.17082	0.00425697
AK3P2	0.035533	0.135	11.3009	0.000774713
AK3P3	0.0253807	0.085	5.64832	0.0174721
AK3P4	0.0203046	0.1	9.73895	0.00180404
AKAIN1	0.00507614	0.045	4.91895	0.0265636
AKAP1	0	0.03	4.15446	0.0415249
AKAP1-DT	0	0.03	4.15446	0.0415249
AKAP9	0.0253807	0.095	7.28751	0.00694357
AKR1A1	0	0.03	4.15446	0.0415249
AKR1B10	0.0203046	0.105	10.6722	0.00108755
AKR1B15	0.0203046	0.105	10.6722	0.00108755
AKR1B1P1	0.00507614	0.045	4.91895	0.0265636
AKR1D1	0.035533	0.12	8.69764	0.00318622
AL109763.1	0	0.07	12.3106	0.000450403
AL157359.4	0.0152284	0.07	5.98897	0.0143956
AL449214.1	0	0.03	4.15446	0.0415249
AL450226.2	0.0253807	0.08	4.86983	0.0273302
ALDH3A1	0.0101523	0.05	4.10246	0.042821
ALDH3A2	0.0101523	0.06	5.85737	0.0155119
ALDH7A1	0.0253807	0.09	6.45515	0.0110631
ALDH7A1P3	0.0253807	0.135	14.6471	0.000129635
ALDOC	0	0.055	9.19571	0.00242583
ALG3P1	0.00507614	0.04	4.00075	0.0454799
ALG9	0.00507614	0.04	4.00075	0.0454799
ALG9-IT1	0.00507614	0.04	4.00075	0.0454799
ALKBH4	0.0203046	0.1	9.73895	0.00180404
ALKBH5	0.0152284	0.075	6.86881	0.0087713
ALOX12	0.0304569	0.09	5.19087	0.0227058
ALOX12-AS1	0.0253807	0.075	4.12306	0.0423026
ALOX12B	0.0253807	0.085	5.64832	0.0174721
ALOX12P1	0.0101523	0.08	9.63062	0.0019136
ALOX12P2	0.0253807	0.075	4.12306	0.0423026
ALOX15	0.0253807	0.09	6.45515	0.0110631
ALOX15B	0.0152284	0.08	7.77101	0.00530914
ALOXE3	0.0253807	0.09	6.45515	0.0110631
ALOXE3P1	0.0253807	0.085	5.64832	0.0174721
AMBRA1	0	0.04	6.14381	0.0131873
AMZ1	0.035533	0.1	5.5299	0.0186942
AMZ2	0	0.045	7.15328	0.00748269
ANGPT2	0.0304569	0.135	12.8932	0.000329772
ANGPTL7	0.00507614	0.045	4.91895	0.0265636
ANK1	0.0253807	0.11	9.91613	0.00163836
ANKHD1	0.0152284	0.115	14.5528	0.000136286
ANKHD1-EIF4EBP3	0.0152284	0.115	14.5528	0.000136286
ANKIB1	0.0101523	0.095	12.618	0.000382051
ANKMY2	0.0253807	0.08	4.86983	0.0273302
ANKRA2	0.00507614	0.055	6.82123	0.00900807
ANKRD13D	0.00507614	0.045	4.91895	0.0265636
ANKRD20A11P	0.0203046	0.08	6.19745	0.0127935
ANKRD20A18P	0.0101523	0.065	6.77266	0.0092565
ANKRD40	0	0.045	7.15328	0.00748269
ANKRD46	0.0203046	0.105	10.6722	0.00108755
ANKRD49	0.0101523	0.065	6.77266	0.0092565
ANKRD54	0	0.04	6.14381	0.0131873
ANKRD61	0.0253807	0.08	4.86983	0.0273302
ANKRD7	0.0101523	0.105	14.6667	0.000128291
ANLN	0.0152284	0.095	10.5892	0.0011375
ANO3-AS1	0.00507614	0.04	4.00075	0.0454799
ANXA13	0.035533	0.12	8.69764	0.00318622
ANXA6	0.0101523	0.1	13.6371	0.000221755
AOAH	0.0101523	0.075	8.66157	0.00324991
AOAH-IT1	0.0152284	0.085	8.69308	0.00319421
AOC1	0.0304569	0.14	13.8413	0.000198919
AOC2	0.0253807	0.08	4.86983	0.0273302
AOC3	0.0253807	0.08	4.86983	0.0273302
AOC4P	0.0253807	0.08	4.86983	0.0273302
AOPEP	0	0.03	4.15446	0.0415249
AP000146.2	0.0152284	0.065	5.13461	0.0234533
AP000221.1	0.00507614	0.065	8.78779	0.00303253
AP000223.42	0.0152284	0.08	7.77101	0.00530914
AP000223.43	0.0101523	0.075	8.66157	0.00324991
AP000235.3	0.0101523	0.06	5.85737	0.0155119
AP000248.1	0.0304569	0.085	4.45643	0.0347702
AP000251.3	0.00507614	0.055	6.82123	0.00900807
AP000265.1	0.0101523	0.055	4.96579	0.0258534
AP000275.64	0.0101523	0.07	7.70825	0.0054969
AP000281.1	0.0152284	0.07	5.98897	0.0143956
AP000282.2	0.0101523	0.05	4.10246	0.042821
AP000289.6	0.0203046	0.07	4.57258	0.0324876
AP000295.9	0.0101523	0.055	4.96579	0.0258534
AP000302.58	0.00507614	0.055	6.82123	0.00900807
AP000318.2	0.00507614	0.04	4.00075	0.0454799
AP000320.7	0.0152284	0.06	4.30969	0.0378959
AP000431.2	0	0.06	10.2275	0.00138363
AP000437.3	0	0.045	7.15328	0.00748269
AP000442.1	0	0.035	5.14356	0.0233328
AP000457.2	0	0.08	14.4186	0.000146349
AP000459.7	0.0304569	0.085	4.45643	0.0347702
AP000470.2	0	0.065	11.2658	0.000789467
AP000472.3	0.00507614	0.065	8.78779	0.00303253
AP000473.6	0.00507614	0.055	6.82123	0.00900807
AP000474.1	0.00507614	0.07	9.78993	0.0017547
AP000560.3	0	0.035	5.14356	0.0233328
AP000563.2	0.00507614	0.055	6.82123	0.00900807
AP000619.5	0.00507614	0.055	6.82123	0.00900807
AP000619.6	0.0101523	0.055	4.96579	0.0258534
AP000640.2	0	0.035	5.14356	0.0233328
AP000647.3	0.0101523	0.07	7.70825	0.0054969
AP000648.4	0	0.04	6.14381	0.0131873
AP000692.9	0.0152284	0.07	5.98897	0.0143956
AP000696.2	0.00507614	0.08	11.8258	0.000584144
AP000704.5	0.00507614	0.065	8.78779	0.00303253
AP000705.6	0.00507614	0.065	8.78779	0.00303253
AP000705.7	0	0.065	11.2658	0.000789467
AP000855.4	0.0101523	0.07	7.70825	0.0054969
AP000860.2	0.00507614	0.045	4.91895	0.0265636
AP000889.1	0	0.045	7.15328	0.00748269
AP000889.2	0	0.05	8.17082	0.00425697
AP000892.6	0.0101523	0.05	4.10246	0.042821
AP000925.2	0.00507614	0.04	4.00075	0.0454799
AP000936.1	0.00507614	0.06	7.79769	0.00523132
AP000962.1	0.00507614	0.055	6.82123	0.00900807
AP001042.1	0.0253807	0.095	7.28751	0.00694357
AP001042.2	0.0253807	0.095	7.28751	0.00694357
AP001043.1	0.0152284	0.085	8.69308	0.00319421
AP001062.7	0.0304569	0.085	4.45643	0.0347702
AP001062.9	0.0304569	0.085	4.45643	0.0347702
AP001063.1	0.0304569	0.085	4.45643	0.0347702
AP001066.12	0.035533	0.09	4.10929	0.0426484
AP001136.2	0	0.07	12.3106	0.000450403
AP001172.3	0	0.05	8.17082	0.00425697
AP001255.2	0.00507614	0.085	12.858	0.000336037
AP001258.5	0	0.04	6.14381	0.0131873
AP001342.1	0.0101523	0.06	5.85737	0.0155119
AP001347.6	0.0152284	0.065	5.13461	0.0234533
AP001372.2	0.00507614	0.055	6.82123	0.00900807
AP001412.1	0.0101523	0.075	8.66157	0.00324991
AP001425.14	0.0253807	0.075	4.12306	0.0423026
AP001432.14	0.0152284	0.075	6.86881	0.0087713
AP001434.2	0.0152284	0.075	6.86881	0.0087713
AP001437.2	0.0152284	0.075	6.86881	0.0087713
AP001442.2	0.00507614	0.065	8.78779	0.00303253
AP001468.58	0.035533	0.1	5.5299	0.0186942
AP001469.5	0.035533	0.1	5.5299	0.0186942
AP001469.7	0.035533	0.1	5.5299	0.0186942
AP001469.9	0.035533	0.1	5.5299	0.0186942
AP001471.1	0.035533	0.095	4.80396	0.0283944
AP001476.3	0.035533	0.09	4.10929	0.0426484
AP001476.4	0.035533	0.09	4.10929	0.0426484
AP001505.10	0.035533	0.09	4.10929	0.0426484
AP001595.1	0.035533	0.09	4.10929	0.0426484
AP001601.2	0.035533	0.09	4.10929	0.0426484
AP001604.3	0.00507614	0.06	7.79769	0.00523132
AP001605.4	0.00507614	0.065	8.78779	0.00303253
AP001610.9	0.0304569	0.09	5.19087	0.0227058
AP001615.9	0.0304569	0.09	5.19087	0.0227058
AP001619.2	0.035533	0.09	4.10929	0.0426484
AP001619.3	0.035533	0.09	4.10929	0.0426484
AP001625.4	0.0101523	0.07	7.70825	0.0054969
AP001625.5	0.0152284	0.07	5.98897	0.0143956
AP001625.6	0.00507614	0.075	10.8029	0.0010134
AP001628.7	0.0152284	0.08	7.77101	0.00530914
AP002856.4	0.0101523	0.07	7.70825	0.0054969
AP003419.11	0.0101523	0.05	4.10246	0.042821
AP006216.5	0.0203046	0.07	4.57258	0.0324876
AP006547.3	0.035533	0.135	11.3009	0.000774713
AP006748.1	0.0101523	0.08	9.63062	0.0019136
AP1B1P1	0.0152284	0.065	5.13461	0.0234533
AP1B1P2	0.0152284	0.065	5.13461	0.0234533
AP1S1	0.0304569	0.115	9.26468	0.00233615
AP1S2P1	0.0101523	0.09	11.61	0.000655997
AP2B1	0.00507614	0.065	8.78779	0.00303253
AP3B1	0.00507614	0.045	4.91895	0.0265636
AP3S1	0.00507614	0.085	12.858	0.000336037
AP4M1	0.0304569	0.115	9.26468	0.00233615
AP5Z1	0.035533	0.105	6.28441	0.0121805
APBB3	0.0253807	0.11	9.91613	0.00163836
APC	0.0152284	0.085	8.69308	0.00319421
APOA4	0.0152284	0.07	5.98897	0.0143956
APOBEC3C	0	0.035	5.14356	0.0233328
APOBEC3D	0	0.035	5.14356	0.0233328
APOBEC3F	0	0.035	5.14356	0.0233328
APOBEC3G	0	0.035	5.14356	0.0233328
APOBEC3H	0	0.035	5.14356	0.0233328
APOLD1	0.00507614	0.05	5.86061	0.0154834
APOOP1	0.0101523	0.075	8.66157	0.00324991
APP	0.00507614	0.06	7.79769	0.00523132
APPBP2	0	0.03	4.15446	0.0415249
APTR	0.0101523	0.07	7.70825	0.0054969
AQP1	0.0152284	0.09	9.63302	0.0019111
ARAFP1	0.0203046	0.075	5.37042	0.020481
ARAFP2	0.0253807	0.09	6.45515	0.0110631
ARAFP3	0.0253807	0.09	6.45515	0.0110631
ARAP1	0.00507614	0.06	7.79769	0.00523132
ARAP1-AS1	0.00507614	0.06	7.79769	0.00523132
ARAP1-AS2	0.00507614	0.06	7.79769	0.00523132
ARAP3	0.0304569	0.105	7.56405	0.00595441
ARC	0.035533	0.135	11.3009	0.000774713
AREG	0.00507614	0.045	4.91895	0.0265636
ARF1P3	0.0304569	0.11	8.40377	0.00374444
ARF5	0.035533	0.14	12.2049	0.000476631
ARFGAP3	0.00507614	0.055	6.82123	0.00900807
ARFIP1	0	0.03	4.15446	0.0415249
ARGFXP1	0.0101523	0.105	14.6667	0.000128291
ARGFXP2	0.0101523	0.055	4.96579	0.0258534
ARHGAP23	0.00507614	0.05	5.86061	0.0154834
ARHGAP26	0.0101523	0.085	10.6138	0.00112245
ARHGAP26-AS1	0.0304569	0.115	9.26468	0.00233615
ARHGAP27P2	0	0.045	7.15328	0.00748269
ARHGAP44	0.0101523	0.065	6.77266	0.0092565
ARHGAP44-AS1	0.0101523	0.055	4.96579	0.0258534
ARHGEF10	0.0304569	0.135	12.8932	0.000329772
ARHGEF15	0.0101523	0.07	7.70825	0.0054969
ARHGEF37	0.0304569	0.115	9.26468	0.00233615
ARIH2P1	0	0.03	4.15446	0.0415249
ARL14EPL	0.00507614	0.09	13.8989	0.000192912
ARL2BPP4	0.0101523	0.08	9.63062	0.0019136
ARL4A	0.0253807	0.075	4.12306	0.0423026
ARL4D	0.00507614	0.05	5.86061	0.0154834
ARL5C	0.0203046	0.08	6.19745	0.0127935
ARL6IP1P3	0.0101523	0.055	4.96579	0.0258534
ARMC10	0.0253807	0.09	6.45515	0.0110631
ARPC1A	0.0152284	0.09	9.63302	0.0019111
ARPC1B	0.0152284	0.09	9.63302	0.0019111
ARPC3P3	0	0.045	7.15328	0.00748269
ARRB1	0.00507614	0.04	4.00075	0.0454799
ARRDC3	0.0253807	0.08	4.86983	0.0273302
ARRDC3-AS1	0.0253807	0.08	4.86983	0.0273302
ARSI	0.0203046	0.105	10.6722	0.00108755
ARSK	0.0152284	0.075	6.86881	0.0087713
ART3	0.00507614	0.04	4.00075	0.0454799
ART4	0.00507614	0.045	4.91895	0.0265636
ARTN	0.00507614	0.045	4.91895	0.0265636
ARVCF	0	0.045	7.15328	0.00748269
ASAH1	0.0152284	0.105	12.5452	0.000397229
ASAP1	0.0253807	0.125	12.7089	0.000363912
ASAP1-IT2	0.035533	0.125	9.54611	0.00200373
ASB10	0.035533	0.12	8.69764	0.00318622
ASB15	0.0304569	0.115	9.26468	0.00233615
ASB15-AS1	0.0203046	0.11	11.6217	0.000651875
ASB16	0	0.045	7.15328	0.00748269
ASB16-AS1	0	0.045	7.15328	0.00748269
ASB4	0.0304569	0.11	8.40377	0.00374444
ASGR1	0.00507614	0.095	14.9481	0.000110511
ASGR2	0.0101523	0.1	13.6371	0.000221755
ASH2L	0.0152284	0.1	11.5603	0.000673751
ASIC3	0.0253807	0.12	11.7618	0.000604578
ASIP	0	0.035	5.14356	0.0233328
ASL	0.00507614	0.08	11.8258	0.000584144
ASNS	0.035533	0.115	7.87015	0.00502575
ASNSP1	0.0152284	0.105	12.5452	0.000397229
ASPA	0.0101523	0.075	8.66157	0.00324991
ASPHD2	0.0101523	0.05	4.10246	0.042821
ASS1P10	0.0253807	0.095	7.28751	0.00694357
ASS1P11	0.0152284	0.09	9.63302	0.0019111
ASS1P13	0	0.055	9.19571	0.00242583
ASZ1	0.0203046	0.125	14.5566	0.000136012
ATAD2	0.0304569	0.13	11.9606	0.000543364
ATAD5	0.0101523	0.07	7.70825	0.0054969
ATF3	0.0101523	0.05	4.10246	0.042821
ATF4	0	0.04	6.14381	0.0131873
ATF4P4	0.0152284	0.07	5.98897	0.0143956
ATF7IP2	0.0304569	0	4.30793	0.0379352
ATG10-AS1	0.0253807	0.075	4.12306	0.0423026
ATG10-IT1	0.0101523	0.065	6.77266	0.0092565
ATG12	0.0101523	0.085	10.6138	0.00112245
ATG16L2	0.00507614	0.05	5.86061	0.0154834
ATG9B	0.035533	0.12	8.69764	0.00318622
ATL3	0	0.03	4.15446	0.0415249
ATOH8	0.00507614	0.04	4.00075	0.0454799
ATOX1	0.0101523	0.09	11.61	0.000655997
ATP10A	0	0.03	4.15446	0.0415249
ATP13A2	0	0.03	4.15446	0.0415249
ATP1B2	0.0203046	0.095	8.8231	0.00297441
ATP2A3	0.0152284	0.07	5.98897	0.0143956
ATP5MF	0.0101523	0.09	11.61	0.000655997
ATP5MF-PTCD1	0.0101523	0.09	11.61	0.000655997
ATP5MFP4	0	0.03	4.15446	0.0415249
ATP5MG	0.0101523	0.055	4.96579	0.0258534
ATP5MGP1	0.00507614	0.04	4.00075	0.0454799
ATP5MGP7	0.0101523	0.06	5.85737	0.0155119
ATP5PBP2	0.0101523	0.095	12.618	0.000382051
ATP5PBP3	0.0253807	0.12	11.7618	0.000604578
ATP5PD	0	0.035	5.14356	0.0233328
ATP5PO	0.0101523	0.065	6.77266	0.0092565
ATP6V0A1	0.0152284	0.06	4.30969	0.0378959
ATP6V0A4	0.0253807	0.13	13.671	0.000217797
ATP6V0B	0.00507614	0.045	4.91895	0.0265636
ATP6V0CP1	0.0152284	0.075	6.86881	0.0087713
ATP6V0CP4	0.00507614	0.045	4.91895	0.0265636
ATP6V0D2	0.0203046	0.12	13.5647	0.000230476
ATP6V0E1P1	0.0101523	0.09	11.61	0.000655997
ATP6V1B2	0.0203046	0.12	13.5647	0.000230476
ATP6V1FNB	0.0304569	0.14	13.8413	0.000198919
ATP6V1G1P6	0	0.045	7.15328	0.00748269
ATP6V1H	0.0253807	0.12	11.7618	0.000604578
ATP9B	0.00507614	0.04	4.00075	0.0454799
ATPAF1	0.00507614	0.04	4.00075	0.0454799
ATPAF2	0	0.07	12.3106	0.000450403
ATXN7L1	0.0304569	0.095	5.95541	0.0146722
ATXN7L3	0	0.045	7.15328	0.00748269
ATXN7L3-AS1	0	0.045	7.15328	0.00748269
AUH	0	0.035	5.14356	0.0233328
AURKB	0.0253807	0.08	4.86983	0.0273302
AUTS2	0.00507614	0.07	9.78993	0.0017547
AVL9	0.035533	0.095	4.80396	0.0283944
AZGP1	0.0253807	0.115	10.8305	0.000998394
AZGP1P1	0.0253807	0.115	10.8305	0.000998394
AZGP1P2	0.0253807	0.11	9.91613	0.00163836
B3GALT5	0.035533	0.095	4.80396	0.0283944
B3GAT3	0.00507614	0.05	5.86061	0.0154834
B3GNTL1	0.00507614	0.065	8.78779	0.00303253
B4GALT2	0.00507614	0.05	5.86061	0.0154834
B4GALT7	0	0.03	4.15446	0.0415249
B4GAT1	0	0.035	5.14356	0.0233328
B9D1	0	0.07	12.3106	0.000450403
BACE2	0.035533	0.09	4.10929	0.0426484
BAG4	0.0253807	0.12	11.7618	0.000604578
BAIAP2L1	0.0152284	0.11	13.5429	0.000233167
BAIAP2L2	0	0.05	8.17082	0.00425697
BAK1P2	0.0152284	0.07	5.98897	0.0143956
BAZ1B	0.00507614	0.065	8.78779	0.00303253
BBOX1	0	0.04	6.14381	0.0131873
BBOX1-AS1	0	0.035	5.14356	0.0233328
BBS1	0	0.035	5.14356	0.0233328
BBS9	0.0152284	0.075	6.86881	0.0087713
BCAP29	0.035533	0.095	4.80396	0.0283944
BCL6B	0.0203046	0.095	8.8231	0.00297441
BCL7B	0.00507614	0.065	8.78779	0.00303253
BCL9L	0.0152284	0.06	4.30969	0.0378959
BCLAF1P1	0.0203046	0.085	7.0503	0.00792519
BCRP2	0	0.045	7.15328	0.00748269
BCRP5	0	0.045	7.15328	0.00748269
BCRP6	0	0.045	7.15328	0.00748269
BCRP7	0	0.045	7.15328	0.00748269
BECN1	0.0253807	0.08	4.86983	0.0273302
BEND3P2	0.00507614	0.045	4.91895	0.0265636
BET1	0.0253807	0.1	8.14306	0.00432262
BET1-AS1	0.0253807	0.1	8.14306	0.00432262
BHLHA15	0.035533	0.115	7.87015	0.00502575
BHLHA9	0.0152284	0.095	10.5892	0.0011375
BHLHE22	0.0152284	0.105	12.5452	0.000397229
BHMT	0.0101523	0.055	4.96579	0.0258534
BID	0.0101523	0.05	4.10246	0.042821
BIN3	0.0304569	0.13	11.9606	0.000543364
BLACE	0.035533	0.135	11.3009	0.000774713
BLK	0.0253807	0.13	13.671	0.000217797
BLMH	0.00507614	0.06	7.79769	0.00523132
BMP1	0.0304569	0.115	9.26468	0.00233615
BMT2	0.0101523	0.1	13.6371	0.000221755
BNC2	0	0.04	6.14381	0.0131873
BNIP3	0	0.045	7.15328	0.00748269
BNIP3L	0.0304569	0.125	11.0443	0.00088959
BNIP3P11	0.0304569	0.095	5.95541	0.0146722
BNIP3P42	0.0203046	0.085	7.0503	0.00792519
BOD1L2	0	0.03	4.15446	0.0415249
BOD1P2	0.00507614	0.045	4.91895	0.0265636
BORCS6	0.0253807	0.08	4.86983	0.0273302
BPTF	0	0.04	6.14381	0.0131873
BRAF	0.0253807	0.12	11.7618	0.000604578
BRAT1	0.0304569	0.09	5.19087	0.0227058
BRCA1	0.00507614	0.06	7.79769	0.00523132
BRCA1P1	0.00507614	0.05	5.86061	0.0154834
BRD7P6	0	0.03	4.15446	0.0415249
BRDT	0	0.045	7.15328	0.00748269
BRF2	0.0152284	0.1	11.5603	0.000673751
BRI3	0.035533	0.11	7.06516	0.00785974
BRI3P3	0	0.07	12.3106	0.000450403
BRIP1	0	0.03	4.15446	0.0415249
BRIX1P1	0.0152284	0.115	14.5528	0.000136286
BRMS1	0	0.035	5.14356	0.0233328
BRWD1	0.0304569	0.1	6.74726	0.00938919
BRWD1-AS1	0.0253807	0.09	6.45515	0.0110631
BRWD1-AS2	0.0253807	0.09	6.45515	0.0110631
BSCL2	0.0101523	0.05	4.10246	0.042821
BSND	0.00507614	0.045	4.91895	0.0265636
BTBD10	0	0.035	5.14356	0.0233328
BTF3L4P1	0.0253807	0.08	4.86983	0.0273302
BTF3P1	0.0253807	0.125	12.7089	0.000363912
BTF3P13	0	0.04	6.14381	0.0131873
BTF3P14	0.0152284	0.065	5.13461	0.0234533
BTF3P3	0.0304569	0.105	7.56405	0.00595441
BTG3	0.0203046	0.08	6.19745	0.0127935
BTG3-AS1	0.0304569	0.09	5.19087	0.0227058
BUB3P1	0.0152284	0.115	14.5528	0.000136286
BUD13P1	0	0.04	6.14381	0.0131873
BUD23	0.0253807	0.09	6.45515	0.0110631
BUD31	0.0101523	0.09	11.61	0.000655997
BUD31P1	0.0304569	0.12	10.1453	0.00144669
BZW2	0.0203046	0.075	5.37042	0.020481
C11orf49	0	0.03	4.15446	0.0415249
C11orf53	0.0152284	0.065	5.13461	0.0234533
C11orf80	0	0.035	5.14356	0.0233328
C11orf86	0	0.035	5.14356	0.0233328
C11orf87	0.0152284	0.06	4.30969	0.0378959
C12orf60	0.00507614	0.045	4.91895	0.0265636
C14orf93	0	0.035	5.14356	0.0233328
C17orf113	0	0.05	8.17082	0.00425697
C17orf114	0.0152284	0.065	5.13461	0.0234533
C17orf49	0.0203046	0.09	7.92627	0.00487222
C17orf58	0	0.045	7.15328	0.00748269
C17orf75	0.0203046	0.07	4.57258	0.0324876
C17orf80	0	0.04	6.14381	0.0131873
C1DP5	0	0.04	6.14381	0.0131873
C1GALT1	0.0101523	0.095	12.618	0.000382051
C1orf174	0.00507614	0.055	6.82123	0.00900807
C1orf195	0.0101523	0.055	4.96579	0.0258534
C1orf50	0	0.035	5.14356	0.0233328
C1QBPP2	0	0.035	5.14356	0.0233328
C1QL1	0.0101523	0.05	4.10246	0.042821
C21orf91	0.0152284	0.065	5.13461	0.0234533
C21orf91-OT1	0.0101523	0.065	6.77266	0.0092565
C22orf23	0	0.05	8.17082	0.00425697
C22orf24	0.0101523	0.05	4.10246	0.042821
C22orf39	0	0.045	7.15328	0.00748269
C22orf46	0	0.045	7.15328	0.00748269
C2CD2	0.035533	0.09	4.10929	0.0426484
C5orf15	0.00507614	0.09	13.8989	0.000192912
C5orf46	0.00507614	0.09	13.8989	0.000192912
C5orf47	0.00507614	0.045	4.91895	0.0265636
C5orf52	0.0152284	0.08	7.77101	0.00530914
C5orf63	0.0152284	0.08	7.77101	0.00530914
C5orf64	0	0.04	6.14381	0.0131873
C5orf66-AS1	0.0304569	0.115	9.26468	0.00233615
C5orf66-AS2	0.0101523	0.1	13.6371	0.000221755
C7orf25	0.035533	0.09	4.10929	0.0426484
C7orf26	0.0304569	0.085	4.45643	0.0347702
C7orf31	0.0152284	0.075	6.86881	0.0087713
C7orf33	0.0152284	0.115	14.5528	0.000136286
C7orf50	0.035533	0.105	6.28441	0.0121805
C7orf57	0.0101523	0.08	9.63062	0.0019136
C7orf61	0.0253807	0.115	10.8305	0.000998394
C7orf65	0.0203046	0.07	4.57258	0.0324876
C7orf69	0.0101523	0.09	11.61	0.000655997
C7orf77	0.0152284	0.11	13.5429	0.000233167
C8orf17	0.0304569	0.125	11.0443	0.00088959
C8orf31	0.035533	0.135	11.3009	0.000774713
C8orf34-AS1	0.0203046	0.115	12.5862	0.000388614
C8orf37	0.0101523	0.105	14.6667	0.000128291
C8orf58	0.0304569	0.13	11.9606	0.000543364
C8orf76	0.0152284	0.11	13.5429	0.000233167
C8orf86	0.0101523	0.105	14.6667	0.000128291
C8orf88	0.0253807	0.12	11.7618	0.000604578
CA1	0.0253807	0.115	10.8305	0.000998394
CA10	0	0.055	9.19571	0.00242583
CA13	0.0101523	0.105	14.6667	0.000128291
CA15P1	0	0.045	7.15328	0.00748269
CA15P2	0	0.045	7.15328	0.00748269
CA2	0.0253807	0.125	12.7089	0.000363912
CA3	0.0304569	0.125	11.0443	0.00088959
CA3-AS1	0.0253807	0.135	14.6471	0.000129635
CACNA1G	0.0101523	0.06	5.85737	0.0155119
CACNA1G-AS1	0.0101523	0.06	5.85737	0.0155119
CACNA1I	0	0.045	7.15328	0.00748269
CACNA2D1	0.0152284	0.07	5.98897	0.0143956
CACNA2D1-AS1	0.0101523	0.08	9.63062	0.0019136
CACNB1	0.0203046	0.08	6.19745	0.0127935
CADPS2	0.035533	0.135	11.3009	0.000774713
CALB1	0.0152284	0.11	13.5429	0.000233167
CALB2	0.00507614	0.055	6.82123	0.00900807
CALCOCO2	0.00507614	0.05	5.86061	0.0154834
CALCR	0.0253807	0.1	8.14306	0.00432262
CALD1	0.0253807	0.115	10.8305	0.000998394
CALM1P2	0.0101523	0.065	6.77266	0.0092565
CALN1	0.035533	0.095	4.80396	0.0283944
CAMK2A	0.0203046	0.1	9.73895	0.00180404
CAMK2B	0.035533	0.1	5.5299	0.0186942
CAMK4	0.0304569	0.1	6.74726	0.00938919
CAMKK1	0.0253807	0.08	4.86983	0.0273302
CAMTA1	0.0101523	0.055	4.96579	0.0258534
CAMTA1-AS1	0.0101523	0.055	4.96579	0.0258534
CAMTA1-DT	0.0101523	0.055	4.96579	0.0258534
CAMTA2	0.0304569	0.09	5.19087	0.0227058
CAPN14	0	0.03	4.15446	0.0415249
CAPN6	0	0.03	4.15446	0.0415249
CAPZA1P4	0.0304569	0.125	11.0443	0.00088959
CAPZA1P5	0.0152284	0.115	14.5528	0.000136286
CAPZA2	0.0253807	0.125	12.7089	0.000363912
CAPZA3	0.0152284	0.06	4.30969	0.0378959
CARD10	0.00507614	0.055	6.82123	0.00900807
CARD11	0.0304569	0.09	5.19087	0.0227058
CARD11-AS1	0.035533	0.105	6.28441	0.0121805
CARD16	0.0101523	0.07	7.70825	0.0054969
CARD17	0.0101523	0.06	5.85737	0.0155119
CARD18	0.0101523	0.06	5.85737	0.0155119
CARMN	0.0253807	0.11	9.91613	0.00163836
CASC17	0	0.04	6.14381	0.0131873
CASC19	0.0304569	0.135	12.8932	0.000329772
CASC3	0.0152284	0.075	6.86881	0.0087713
CASD1	0.035533	0.115	7.87015	0.00502575
CASP1	0	0.055	9.19571	0.00242583
CASP1P1	0.0101523	0.06	5.85737	0.0155119
CASP1P2	0.00507614	0.05	5.86061	0.0154834
CASP2	0.0203046	0.125	14.5566	0.000136012
CASP5	0.0152284	0.07	5.98897	0.0143956
CASP9	0	0.035	5.14356	0.0233328
CAST	0.0253807	0.1	8.14306	0.00432262
CASTOR1	0	0.055	9.19571	0.00242583
CASTOR2	0.00507614	0.07	9.78993	0.0017547
CASTOR3	0.0253807	0.115	10.8305	0.000998394
CASZ1	0.0152284	0.06	4.30969	0.0378959
CAT	0	0.04	6.14381	0.0131873
CATSPER3	0.00507614	0.095	14.9481	0.000110511
CATSPER4	0	0.035	5.14356	0.0233328
CAV1	0.0203046	0.1	9.73895	0.00180404
CAV2	0.0152284	0.115	14.5528	0.000136286
CAVIN1	0.0253807	0.075	4.12306	0.0423026
CBLIF	0	0.03	4.15446	0.0415249
CBLL1	0.035533	0.105	6.28441	0.0121805
CBR4	0.00507614	0.04	4.00075	0.0454799
CBX3P3	0.0304569	0.105	7.56405	0.00595441
CBX6	0	0.04	6.14381	0.0131873
CBX7	0	0.035	5.14356	0.0233328
CBY1	0	0.035	5.14356	0.0233328
CCAR2	0.0304569	0.13	11.9606	0.000543364
CCAT2	0.035533	0.13	10.4142	0.00125047
CCDC112	0.0152284	0.085	8.69308	0.00319421
CCDC116	0	0.045	7.15328	0.00748269
CCDC117	0	0.04	6.14381	0.0131873
CCDC126	0.0152284	0.07	5.98897	0.0143956
CCDC144A	0.00507614	0.055	6.82123	0.00900807
CCDC146	0.0203046	0.08	6.19745	0.0127935
CCDC15	0.0101523	0.065	6.77266	0.0092565
CCDC15-DT	0.0101523	0.065	6.77266	0.0092565
CCDC157	0.00507614	0.055	6.82123	0.00900807
CCDC163	0	0.03	4.15446	0.0415249
CCDC166	0.035533	0.13	10.4142	0.00125047
CCDC179	0.00507614	0.04	4.00075	0.0454799
CCDC185	0.00507614	0.045	4.91895	0.0265636
CCDC188	0	0.045	7.15328	0.00748269
CCDC192	0.0101523	0.095	12.618	0.000382051
CCDC198	0	0.03	4.15446	0.0415249
CCDC200	0.00507614	0.05	5.86061	0.0154834
CCDC201	0.0203046	0.08	6.19745	0.0127935
CCDC24	0	0.05	8.17082	0.00425697
CCDC26	0.0203046	0.115	12.5862	0.000388614
CCDC28B	0	0.03	4.15446	0.0415249
CCDC42	0.0101523	0.065	6.77266	0.0092565
CCDC43	0.00507614	0.04	4.00075	0.0454799
CCDC47	0	0.03	4.15446	0.0415249
CCDC66	0	0.03	4.15446	0.0415249
CCDC71L	0.0304569	0.105	7.56405	0.00595441
CCDC74BP1	0	0.045	7.15328	0.00748269
CCDC75P1	0.00507614	0.04	4.00075	0.0454799
CCDC82	0	0.04	6.14381	0.0131873
CCDC87	0	0.035	5.14356	0.0233328
CCDC92B	0.00507614	0.07	9.78993	0.0017547
CCL18	0.0152284	0.06	4.30969	0.0378959
CCL23	0.0203046	0.07	4.57258	0.0324876
CCL24	0.0203046	0.085	7.0503	0.00792519
CCL26	0.0203046	0.085	7.0503	0.00792519
CCM2	0.0253807	0.09	6.45515	0.0110631
CCN4	0.0304569	0.135	12.8932	0.000329772
CCNB1	0.00507614	0.045	4.91895	0.0265636
CCNB2P1	0.0152284	0.1	11.5603	0.000673751
CCNH	0.00507614	0.06	7.79769	0.00523132
CCNI2	0.00507614	0.09	13.8989	0.000192912
CCNJL	0	0.06	10.2275	0.00138363
CCNJP2	0	0.03	4.15446	0.0415249
CCR7	0.0203046	0.08	6.19745	0.0127935
CCS	0	0.035	5.14356	0.0233328
CCSER2	0	0.03	4.15446	0.0415249
CCT4P1	0.0203046	0.105	10.6722	0.00108755
CCT5P1	0.00507614	0.08	11.8258	0.000584144
CCT6B	0.00507614	0.05	5.86061	0.0154834
CCT6P1	0.00507614	0.075	10.8029	0.0010134
CCT6P3	0.0101523	0.075	8.66157	0.00324991
CCT7P2	0.0101523	0.07	7.70825	0.0054969
CCT8L1P	0.0253807	0.13	13.671	0.000217797
CD14	0.0203046	0.105	10.6722	0.00108755
CD164L2	0	0.03	4.15446	0.0415249
CD300LG	0	0.05	8.17082	0.00425697
CD36	0.00507614	0.065	8.78779	0.00303253
CD44	0.0101523	0.06	5.85737	0.0155119
CD5	0	0.035	5.14356	0.0233328
CD6	0	0.035	5.14356	0.0233328
CD68	0.0203046	0.095	8.8231	0.00297441
CD74	0.0152284	0.1	11.5603	0.000673751
CDC14C	0.0253807	0.075	4.12306	0.0423026
CDC27	0	0.04	6.14381	0.0131873
CDC42EP1	0.00507614	0.055	6.82123	0.00900807
CDC42EP4	0	0.035	5.14356	0.0233328
CDC42P2	0.0152284	0.095	10.5892	0.0011375
CDC42P3	0.035533	0.135	11.3009	0.000774713
CDC42SE2	0.00507614	0.08	11.8258	0.000584144
CDC45	0	0.045	7.15328	0.00748269
CDC6	0.0203046	0.07	4.57258	0.0324876
CDCA2	0.0101523	0.105	14.6667	0.000128291
CDH17	0.0152284	0.11	13.5429	0.000233167
CDH8	0	0.035	5.14356	0.0233328
CDHR3	0.0101523	0.1	13.6371	0.000221755
CDK12	0.00507614	0.06	7.79769	0.00523132
CDK13	0.0253807	0.075	4.12306	0.0423026
CDK14	0.035533	0.1	5.5299	0.0186942
CDK5	0.0253807	0.12	11.7618	0.000604578
CDK5R1	0.0203046	0.07	4.57258	0.0324876
CDK6	0.0304569	0.1	6.74726	0.00938919
CDK6-AS1	0.0203046	0.1	9.73895	0.00180404
CDK7	0.00507614	0.045	4.91895	0.0265636
CDKL3	0.0253807	0.105	9.01983	0.00267066
CDKN2AIPNL	0.0253807	0.095	7.28751	0.00694357
CDO1	0.0152284	0.085	8.69308	0.00319421
CDON	0.0101523	0.06	5.85737	0.0155119
CDR2L	0	0.035	5.14356	0.0233328
CDRT1	0.0152284	0.07	5.98897	0.0143956
CDRT15	0.0152284	0.07	5.98897	0.0143956
CDRT15P2	0.0253807	0.08	4.86983	0.0273302
CDRT4	0.0152284	0.07	5.98897	0.0143956
CDRT7	0.0152284	0.07	5.98897	0.0143956
CDRT8	0.0152284	0.07	5.98897	0.0143956
CDX1	0.0253807	0.105	9.01983	0.00267066
CDX2	0.00507614	0.045	4.91895	0.0265636
CECR2	0.00507614	0.04	4.00075	0.0454799
CECR3	0	0.05	8.17082	0.00425697
CECR7	0.0101523	0.055	4.96579	0.0258534
CELA2A	0	0.03	4.15446	0.0415249
CELA2B	0	0.03	4.15446	0.0415249
CELF2-AS1	0.00507614	0.045	4.91895	0.0265636
CENATAC	0.0101523	0.055	4.96579	0.0258534
CENATAC-DT	0.0101523	0.055	4.96579	0.0258534
CENPK	0	0.03	4.15446	0.0415249
CENPP	0	0.04	6.14381	0.0131873
CENPS	0.00507614	0.055	6.82123	0.00900807
CENPS-CORT	0.00507614	0.055	6.82123	0.00900807
CENPV	0.0101523	0.07	7.70825	0.0054969
CEP295	0	0.035	5.14356	0.0233328
CEP57L1P1	0	0.03	4.15446	0.0415249
CEP85	0	0.035	5.14356	0.0233328
CEP95	0	0.03	4.15446	0.0415249
CERS1	0.00507614	0.04	4.00075	0.0454799
CERT1	0.00507614	0.04	4.00075	0.0454799
CETN3	0.00507614	0.06	7.79769	0.00523132
CFAP300	0.0152284	0.06	4.30969	0.0378959
CFAP410	0.0304569	0.085	4.45643	0.0347702
CFAP52	0.0253807	0.08	4.86983	0.0273302
CFAP69	0.0304569	0.11	8.40377	0.00374444
CFAP97D1	0	0.05	8.17082	0.00425697
CFAP97P1	0	0.05	8.17082	0.00425697
CFL1P6	0.00507614	0.045	4.91895	0.0265636
CFTR	0.0304569	0.12	10.1453	0.00144669
CFTR-AS1	0.0304569	0.13	11.9606	0.000543364
CH17-12M21.1	0	0.075	13.3615	0.000256841
CH17-140K24.1	0.0304569	0.115	9.26468	0.00233615
CH17-140K24.2	0.0304569	0.11	8.40377	0.00374444
CH17-140K24.4	0.0304569	0.115	9.26468	0.00233615
CH17-140K24.5	0.0304569	0.115	9.26468	0.00233615
CH17-140K24.6	0.0304569	0.115	9.26468	0.00233615
CH17-140K24.7	0.0304569	0.115	9.26468	0.00233615
CH17-140K24.8	0.035533	0.115	7.87015	0.00502575
CH17-232I21.1	0.00507614	0.07	9.78993	0.0017547
CH17-264B6.1	0.0253807	0.075	4.12306	0.0423026
CH17-264B6.3	0.0253807	0.075	4.12306	0.0423026
CH17-264B6.5	0.0253807	0.075	4.12306	0.0423026
CH17-264B6.6	0.0253807	0.075	4.12306	0.0423026
CH17-323A09.2	0.0304569	0.135	12.8932	0.000329772
CH17-98J9.1	0.0304569	0.125	11.0443	0.00088959
CHAD	0.0101523	0.05	4.10246	0.042821
CHAF1B	0.0152284	0.065	5.13461	0.0234533
CHCHD2P9	0.00507614	0.045	4.91895	0.0265636
CHCHD3	0.0304569	0.125	11.0443	0.00088959
CHCHD4P5	0.00507614	0.04	4.00075	0.0454799
CHD1	0	0.075	13.3615	0.000256841
CHD3	0.0253807	0.09	6.45515	0.0110631
CHD7	0.0253807	0.125	12.7089	0.000363912
CHEK1	0.0101523	0.075	8.66157	0.00324991
CHEK2	0	0.05	8.17082	0.00425697
CHMP4C	0.0203046	0.115	12.5862	0.000388614
CHMP7	0.0152284	0.11	13.5429	0.000233167
CHN2	0.0203046	0.075	5.37042	0.020481
CHN2-AS1	0.0101523	0.07	7.70825	0.0054969
CHODL	0.0101523	0.06	5.85737	0.0155119
CHORDC1P5	0	0.04	6.14381	0.0131873
CHPF2	0.0304569	0.115	9.26468	0.00233615
CHRDL2	0.00507614	0.06	7.79769	0.00523132
CHRM2	0.0203046	0.125	14.5566	0.000136012
CHRM3-AS1	0	0.045	7.15328	0.00748269
CHRM3-AS2	0	0.04	6.14381	0.0131873
CHRM4	0	0.05	8.17082	0.00425697
CHRNA2	0.0304569	0.13	11.9606	0.000543364
CHRNB1	0.0152284	0.095	10.5892	0.0011375
CHRNE	0.0152284	0.07	5.98897	0.0143956
CHST1	0.0101523	0.055	4.96579	0.0258534
CHST12	0.0253807	0.09	6.45515	0.0110631
CHST4	0.00507614	0.045	4.91895	0.0265636
CHST8	0.00507614	0.04	4.00075	0.0454799
CHSY3	0.0101523	0.085	10.6138	0.00112245
CIBAR1	0.0253807	0.135	14.6471	0.000129635
CIBAR2	0	0.035	5.14356	0.0233328
CICP11	0.0253807	0.075	4.12306	0.0423026
CICP12	0.0253807	0.075	4.12306	0.0423026
CICP20	0.0304569	0.085	4.45643	0.0347702
CICP24	0.0253807	0.09	6.45515	0.0110631
CIR1P1	0.0304569	0.095	5.95541	0.0146722
CIR1P3	0	0.04	6.14381	0.0131873
CITED4	0.00507614	0.04	4.00075	0.0454799
CITF22-49D8.1	0.0101523	0.055	4.96579	0.0258534
CKMT2-AS1	0	0.045	7.15328	0.00748269
CKS1BP5	0.0253807	0.095	7.28751	0.00694357
CKS1BP7	0.0203046	0.105	10.6722	0.00108755
CLCN1	0.0304569	0.135	12.8932	0.000329772
CLCP1	0.0152284	0.06	4.30969	0.0378959
CLDN12	0.0101523	0.09	11.61	0.000655997
CLDN15	0.0253807	0.115	10.8305	0.000998394
CLDN19	0	0.03	4.15446	0.0415249
CLDN4	0.00507614	0.07	9.78993	0.0017547
CLDN5	0	0.045	7.15328	0.00748269
CLDN8	0.0101523	0.05	4.10246	0.042821
CLEC10A	0.0152284	0.1	11.5603	0.000673751
CLEC2L	0.035533	0.13	10.4142	0.00125047
CLEC5A	0.0203046	0.115	12.5862	0.000388614
CLIC6	0.0152284	0.065	5.13461	0.0234533
CLINT1	0.00507614	0.08	11.8258	0.000584144
CLIP2	0.00507614	0.07	9.78993	0.0017547
CLK2P1	0.0101523	0.07	7.70825	0.0054969
CLMAT3	0.0152284	0.095	10.5892	0.0011375
CLN8	0.0253807	0.135	14.6471	0.000129635
CLNS1A	0.00507614	0.04	4.00075	0.0454799
CLTC	0.00507614	0.04	4.00075	0.0454799
CLTCL1	0	0.045	7.15328	0.00748269
CLU	0.0253807	0.12	11.7618	0.000604578
CLUH	0	0.07	12.3106	0.000450403
CLVS1	0.0304569	0.135	12.8932	0.000329772
CMB9-43M24.1	0.0101523	0.05	4.10246	0.042821
CMB9-60A24.1	0	0.035	5.14356	0.0233328
CMB9-76D16.1	0	0.04	6.14381	0.0131873
CMPK1	0	0.03	4.15446	0.0415249
CNGB3	0.0152284	0.11	13.5429	0.000233167
CNKSR1	0	0.035	5.14356	0.0233328
CNN3	0	0.035	5.14356	0.0233328
CNN3-DT	0	0.03	4.15446	0.0415249
CNOT8	0.0253807	0.095	7.28751	0.00694357
CNP	0.00507614	0.055	6.82123	0.00900807
CNPY1	0.035533	0.14	12.2049	0.000476631
CNPY4	0.0253807	0.115	10.8305	0.000998394
CNST	0.00507614	0.04	4.00075	0.0454799
CNTD1	0.0253807	0.08	4.86983	0.0273302
CNTN5	0	0.04	6.14381	0.0131873
CNTNAP1	0.0203046	0.07	4.57258	0.0324876
CNTNAP2	0.035533	0.125	9.54611	0.00200373
CNTNAP2-AS1	0.035533	0.13	10.4142	0.00125047
CNTROB	0.0253807	0.085	5.64832	0.0174721
COA1	0.0152284	0.075	6.86881	0.0087713
COA3	0.0253807	0.08	4.86983	0.0273302
COASY	0.0101523	0.06	5.85737	0.0155119
COBL	0.0101523	0.075	8.66157	0.00324991
COG1	0	0.03	4.15446	0.0415249
COG5	0.0101523	0.095	12.618	0.000382051
COL16A1	0	0.045	7.15328	0.00748269
COL1A2	0.0253807	0.1	8.14306	0.00432262
COL1A2-AS1	0.0253807	0.095	7.28751	0.00694357
COL22A1	0.0304569	0.11	8.40377	0.00374444
COL25A1	0	0.03	4.15446	0.0415249
COL26A1	0.0253807	0.105	9.01983	0.00267066
COL28A1	0.0253807	0.085	5.64832	0.0174721
COL6A1	0.035533	0.09	4.10929	0.0426484
COL6A2	0.035533	0.095	4.80396	0.0283944
COL8A2	0.0101523	0.05	4.10246	0.042821
COMETT	0.035533	0.115	7.87015	0.00502575
COMMD10	0.00507614	0.09	13.8989	0.000192912
COMP	0.00507614	0.045	4.91895	0.0265636
COMT	0	0.045	7.15328	0.00748269
COPG2	0.035533	0.13	10.4142	0.00125047
COPRS	0.0101523	0.065	6.77266	0.0092565
COPS5	0.0253807	0.125	12.7089	0.000363912
COQ10BP2	0	0.055	9.19571	0.00242583
CORT	0.00507614	0.055	6.82123	0.00900807
COTL1P1	0.00507614	0.055	6.82123	0.00900807
COX10	0.0152284	0.06	4.30969	0.0378959
COX10-AS1	0.0101523	0.06	5.85737	0.0155119
COX19	0.035533	0.105	6.28441	0.0121805
COX5BP3	0.0203046	0.125	14.5566	0.000136012
COX5BP4	0	0.04	6.14381	0.0131873
COX5BP7	0	0.035	5.14356	0.0233328
COX6B1P3	0	0.04	6.14381	0.0131873
COX6B1P4	0.0253807	0.125	12.7089	0.000363912
COX6CP2	0.00507614	0.04	4.00075	0.0454799
COX7C	0.00507614	0.055	6.82123	0.00900807
CPA2	0.0101523	0.105	14.6667	0.000128291
CPA4	0.0253807	0.12	11.7618	0.000604578
CPA5	0.0304569	0.125	11.0443	0.00088959
CPD	0.0152284	0.065	5.13461	0.0234533
CPE	0	0.03	4.15446	0.0415249
CPNE3	0.0203046	0.11	11.6217	0.000651875
CPQ	0.0253807	0.12	11.7618	0.000604578
CPSF1P1	0	0.05	8.17082	0.00425697
CPSF4	0.0101523	0.09	11.61	0.000655997
CPSF4L	0	0.045	7.15328	0.00748269
CPSF7	0	0.035	5.14356	0.0233328
CPT1A	0.00507614	0.05	5.86061	0.0154834
CPT2	0	0.03	4.15446	0.0415249
CPVL	0.0101523	0.085	10.6138	0.00112245
CPVL-AS1	0.0304569	0.1	6.74726	0.00938919
CRAT37	0	0.03	4.15446	0.0415249
CRCP	0.00507614	0.08	11.8258	0.000584144
CREB3L1	0.00507614	0.045	4.91895	0.0265636
CREB3L2	0.0253807	0.115	10.8305	0.000998394
CREB3L2-AS1	0.0152284	0.105	12.5452	0.000397229
CREB5	0.0152284	0.075	6.86881	0.0087713
CRH	0.0152284	0.115	14.5528	0.000136286
CRHBP	0	0.05	8.17082	0.00425697
CRHR2	0.0203046	0.085	7.0503	0.00792519
CRISPLD1	0.0304569	0.125	11.0443	0.00088959
CRK	0.00507614	0.07	9.78993	0.0017547
CRKL	0	0.045	7.15328	0.00748269
CRLF3P2	0.0101523	0.075	8.66157	0.00324991
CROCCP3	0	0.03	4.15446	0.0415249
CROT	0.035533	0.11	7.06516	0.00785974
CRPPA	0.0203046	0.085	7.0503	0.00792519
CRPPA-AS1	0.0101523	0.075	8.66157	0.00324991
CRYBA1	0	0.055	9.19571	0.00242583
CRYZP1	0.0253807	0.09	6.45515	0.0110631
CSDC2	0	0.045	7.15328	0.00748269
CSF1R	0.0253807	0.105	9.01983	0.00267066
CSF2	0.0253807	0.1	8.14306	0.00432262
CSF3	0.0101523	0.065	6.77266	0.0092565
CSGALNACT1	0.0203046	0.115	12.5862	0.000388614
CSH1	0	0.04	6.14381	0.0131873
CSH2	0	0.04	6.14381	0.0131873
CSHL1	0	0.04	6.14381	0.0131873
CSNK1A1	0.0152284	0.095	10.5892	0.0011375
CSNK1A1P3	0	0.075	13.3615	0.000256841
CSNK1E	0.00507614	0.05	5.86061	0.0154834
CSNK1G3	0.0152284	0.085	8.69308	0.00319421
CSPP1	0.0253807	0.115	10.8305	0.000998394
CSTB	0.035533	0.095	4.80396	0.0283944
CT66	0.00507614	0.07	9.78993	0.0017547
CTA-150C2.13	0	0.04	6.14381	0.0131873
CTA-150C2.20	0	0.035	5.14356	0.0233328
CTA-150C2.22	0	0.035	5.14356	0.0233328
CTA-150C2.23	0	0.04	6.14381	0.0131873
CTA-204B4.2	0.0304569	0.125	11.0443	0.00088959
CTA-216E10.11	0.00507614	0.045	4.91895	0.0265636
CTA-223H9.9	0.00507614	0.045	4.91895	0.0265636
CTA-228A9.3	0	0.05	8.17082	0.00425697
CTA-228A9.4	0.00507614	0.05	5.86061	0.0154834
CTA-242H14.1	0.0101523	0.085	10.6138	0.00112245
CTA-242H14.2	0.0101523	0.07	7.70825	0.0054969
CTA-254O6.1	0.0152284	0.095	10.5892	0.0011375
CTA-270D13.1	0.00507614	0.075	10.8029	0.0010134
CTA-271G13.2	0.0253807	0.085	5.64832	0.0174721
CTA-280A3__B.2	0.0101523	0.05	4.10246	0.042821
CTA-286B10.7	0	0.04	6.14381	0.0131873
CTA-286B10.8	0	0.04	6.14381	0.0131873
CTA-292E10.6	0	0.04	6.14381	0.0131873
CTA-292E10.7	0.0101523	0.06	5.85737	0.0155119
CTA-292E10.8	0	0.04	6.14381	0.0131873
CTA-298G8.2	0.0253807	0.075	4.12306	0.0423026
CTA-315H11.2	0.0203046	0.085	7.0503	0.00792519
CTA-326K9.1	0.035533	0.095	4.80396	0.0283944
CTA-339C12.1	0.0203046	0.095	8.8231	0.00297441
CTA-343P13.1	0.0253807	0.12	11.7618	0.000604578
CTA-348C20.1	0.0152284	0.085	8.69308	0.00319421
CTA-351J1.1	0.035533	0.115	7.87015	0.00502575
CTA-351O6.1	0.0152284	0.08	7.77101	0.00530914
CTA-363E19.2	0.0101523	0.095	12.618	0.000382051
CTA-369K23.1	0.0203046	0.1	9.73895	0.00180404
CTA-385F2.1	0.0203046	0.085	7.0503	0.00792519
CTA-392E5.1	0.0253807	0.125	12.7089	0.000363912
CTA-392E5.2	0.0253807	0.12	11.7618	0.000604578
CTA-398F10.2	0.0304569	0.135	12.8932	0.000329772
CTA-415G2.2	0.0101523	0.05	4.10246	0.042821
CTA-459N13.2	0.035533	0.095	4.80396	0.0283944
CTA-85E5.7	0.0101523	0.055	4.96579	0.0258534
CTAGE15	0.0203046	0.115	12.5862	0.000388614
CTAGE6	0.0203046	0.115	12.5862	0.000388614
CTB-102L5.4	0.00507614	0.045	4.91895	0.0265636
CTB-102L5.9	0.00507614	0.045	4.91895	0.0265636
CTB-1048E9.7	0.0101523	0.05	4.10246	0.042821
CTB-104F4.3	0.0304569	0.095	5.95541	0.0146722
CTB-105L4.2	0.0101523	0.05	4.10246	0.042821
CTB-107A22.1	0.0253807	0.11	9.91613	0.00163836
CTB-107G13.1	0.0253807	0.11	9.91613	0.00163836
CTB-108O6.2	0.0101523	0.095	12.618	0.000382051
CTB-109A12.2	0.00507614	0.07	9.78993	0.0017547
CTB-10G5.1	0.0203046	0.1	9.73895	0.00180404
CTB-111F10.1	0.0101523	0.09	11.61	0.000655997
CTB-111H14.1	0.0203046	0.09	7.92627	0.00487222
CTB-113D17.1	0.0101523	0.09	11.61	0.000655997
CTB-113I20.1	0.0203046	0.1	9.73895	0.00180404
CTB-113I20.2	0.0203046	0.09	7.92627	0.00487222
CTB-113P19.3	0.0203046	0.11	11.6217	0.000651875
CTB-113P19.4	0.0101523	0.08	9.63062	0.0019136
CTB-113P19.5	0.0101523	0.09	11.61	0.000655997
CTB-114A6.1	0.0101523	0.1	13.6371	0.000221755
CTB-118P15.3	0.0253807	0.13	13.671	0.000217797
CTB-11I22.1	0.0253807	0.085	5.64832	0.0174721
CTB-120L21.1	0.0203046	0.07	4.57258	0.0324876
CTB-123J14.1	0.00507614	0.045	4.91895	0.0265636
CTB-127M13.1	0.0304569	0.085	4.45643	0.0347702
CTB-130E24.1	0	0.06	10.2275	0.00138363
CTB-131B5.2	0.0152284	0.105	12.5452	0.000397229
CTB-131B5.5	0.0152284	0.105	12.5452	0.000397229
CTB-136N17.1	0.0253807	0.075	4.12306	0.0423026
CTB-138E5.1	0.0253807	0.11	9.91613	0.00163836
CTB-139P11.2	0.0253807	0.1	8.14306	0.00432262
CTB-13F3.1	0.0253807	0.095	7.28751	0.00694357
CTB-13L3.1	0.00507614	0.09	13.8989	0.000192912
CTB-140J7.2	0.0101523	0.1	13.6371	0.000221755
CTB-140J7.3	0.0101523	0.09	11.61	0.000655997
CTB-152G17.4	0.0253807	0.095	7.28751	0.00694357
CTB-152G17.5	0.0203046	0.09	7.92627	0.00487222
CTB-152G17.6	0.0152284	0.09	9.63302	0.0019111
CTB-157D17.2	0.0304569	0.1	6.74726	0.00938919
CTB-158E9.1	0.0253807	0.095	7.28751	0.00694357
CTB-158E9.2	0.0253807	0.095	7.28751	0.00694357
CTB-160O22.1	0.0253807	0.095	7.28751	0.00694357
CTB-161A2.8	0.0304569	0.115	9.26468	0.00233615
CTB-161C1.1	0.0203046	0.085	7.0503	0.00792519
CTB-161J7.1	0.0152284	0.08	7.77101	0.00530914
CTB-161J7.2	0.0152284	0.08	7.77101	0.00530914
CTB-161K23.3	0.035533	0.11	7.06516	0.00785974
CTB-161K23.4	0.035533	0.11	7.06516	0.00785974
CTB-161M19.1	0.0203046	0.095	8.8231	0.00297441
CTB-161M19.2	0.0203046	0.095	8.8231	0.00297441
CTB-161M19.4	0.0203046	0.095	8.8231	0.00297441
CTB-164L20.1	0.0203046	0.11	11.6217	0.000651875
CTB-178M22.2	0	0.055	9.19571	0.00242583
CTB-180C19.1	0.00507614	0.055	6.82123	0.00900807
CTB-181H17.1	0.0304569	0.1	6.74726	0.00938919
CTB-186H2.2	0.0253807	0.075	4.12306	0.0423026
CTB-187M2.1	0	0.065	11.2658	0.000789467
CTB-187M2.2	0.00507614	0.065	8.78779	0.00303253
CTB-187M2.4	0	0.065	11.2658	0.000789467
CTB-1H10.1	0.0253807	0.095	7.28751	0.00694357
CTB-1I21.1	0.0304569	0.1	6.74726	0.00938919
CTB-20D2.1	0.0203046	0.11	11.6217	0.000651875
CTB-22K14.1	0.0101523	0.105	14.6667	0.000128291
CTB-30L5.1	0.0304569	0.105	7.56405	0.00595441
CTB-30L5.2	0.0253807	0.12	11.7618	0.000604578
CTB-30L5.3	0.0304569	0.105	7.56405	0.00595441
CTB-32P11.1	0	0.045	7.15328	0.00748269
CTB-35F21.1	0.0253807	0.1	8.14306	0.00432262
CTB-35F21.3	0.0253807	0.105	9.01983	0.00267066
CTB-35F21.4	0.0101523	0.105	14.6667	0.000128291
CTB-35F21.5	0.0253807	0.105	9.01983	0.00267066
CTB-36H16.2	0.00507614	0.09	13.8989	0.000192912
CTB-3M24.1	0.0101523	0.09	11.61	0.000655997
CTB-3M24.2	0.0203046	0.09	7.92627	0.00487222
CTB-3M24.3	0.0253807	0.095	7.28751	0.00694357
CTB-43I4.1	0.00507614	0.045	4.91895	0.0265636
CTB-43P18.1	0.0101523	0.085	10.6138	0.00112245
CTB-46B19.2	0.0152284	0.085	8.69308	0.00319421
CTB-47B11.1	0.00507614	0.07	9.78993	0.0017547
CTB-47B11.3	0.00507614	0.07	9.78993	0.0017547
CTB-47B8.1	0.0304569	0.1	6.74726	0.00938919
CTB-47B8.4	0.0304569	0.1	6.74726	0.00938919
CTB-49A3.2	0.0253807	0.11	9.91613	0.00163836
CTB-49A3.4	0.0203046	0.11	11.6217	0.000651875
CTB-49A3.5	0.0304569	0.115	9.26468	0.00233615
CTB-4E7.1	0.0101523	0.07	7.70825	0.0054969
CTB-53D8.3	0.0304569	0.105	7.56405	0.00595441
CTB-56J15.1	0	0.07	12.3106	0.000450403
CTB-57H20.1	0.0304569	0.105	7.56405	0.00595441
CTB-63M22.1	0.0101523	0.055	4.96579	0.0258534
CTB-66A9.1	0.0253807	0.11	9.91613	0.00163836
CTB-70D19.1	0.0152284	0.1	11.5603	0.000673751
CTB-73N10.1	0.0253807	0.115	10.8305	0.000998394
CTB-76P12.1	0.0304569	0.085	4.45643	0.0347702
CTB-78F1.1	0	0.035	5.14356	0.0233328
CTB-85C5.1	0.0203046	0.095	8.8231	0.00297441
CTB-85C5.2	0.0203046	0.095	8.8231	0.00297441
CTB-88F18.2	0.0101523	0.08	9.63062	0.0019136
CTB-88F18.3	0.0101523	0.08	9.63062	0.0019136
CTB-88F18.5	0.0253807	0.095	7.28751	0.00694357
CTB-88F18.6	0.0152284	0.095	10.5892	0.0011375
CTB-89H12.4	0.0152284	0.1	11.5603	0.000673751
CTB-96E2.10	0.00507614	0.05	5.86061	0.0154834
CTB-96E2.2	0.0101523	0.05	4.10246	0.042821
CTB-96E2.3	0.0101523	0.05	4.10246	0.042821
CTB-96E2.6	0.00507614	0.05	5.86061	0.0154834
CTB-96E2.7	0.0101523	0.05	4.10246	0.042821
CTB-98M4.1	0.0152284	0.09	9.63302	0.0019111
CTB-99A3.1	0.0152284	0.09	9.63302	0.0019111
CTBP2P4	0.0101523	0.08	9.63062	0.0019136
CTC-1337H24.3	0.0101523	0.05	4.10246	0.042821
CTC-205M6.1	0	0.035	5.14356	0.0233328
CTC-205M6.5	0	0.035	5.14356	0.0233328
CTC-209L16.1	0.0152284	0.09	9.63302	0.0019111
CTC-215C12.2	0.035533	0.135	11.3009	0.000774713
CTC-228N24.2	0.0304569	0.1	6.74726	0.00938919
CTC-248O19.1	0.00507614	0.07	9.78993	0.0017547
CTC-251D13.1	0.0152284	0.1	11.5603	0.000673751
CTC-261N6.1	0.0101523	0.065	6.77266	0.0092565
CTC-261N6.3	0.00507614	0.065	8.78779	0.00303253
CTC-264K15.6	0.00507614	0.045	4.91895	0.0265636
CTC-268N12.2	0.0101523	0.06	5.85737	0.0155119
CTC-269P20.2	0.0253807	0.095	7.28751	0.00694357
CTC-270D5.1	0.0304569	0.115	9.26468	0.00233615
CTC-270D5.2	0.0304569	0.11	8.40377	0.00374444
CTC-276P9.2	0.0152284	0.095	10.5892	0.0011375
CTC-276P9.3	0.0101523	0.095	12.618	0.000382051
CTC-280C13.1	0.0304569	0.1	6.74726	0.00938919
CTC-287O8.1	0.0203046	0.08	6.19745	0.0127935
CTC-296K1.3	0.0152284	0.06	4.30969	0.0378959
CTC-296K1.4	0.0152284	0.06	4.30969	0.0378959
CTC-297N7.1	0.0253807	0.08	4.86983	0.0273302
CTC-297N7.10	0.0253807	0.075	4.12306	0.0423026
CTC-297N7.7	0.0152284	0.08	7.77101	0.00530914
CTC-297N7.9	0.0152284	0.06	4.30969	0.0378959
CTC-303L1.1	0.0253807	0.095	7.28751	0.00694357
CTC-303L1.2	0.0253807	0.095	7.28751	0.00694357
CTC-311G1.1	0	0.08	14.4186	0.000146349
CTC-311G1.2	0.0203046	0.09	7.92627	0.00487222
CTC-321K16.1	0.0253807	0.11	9.91613	0.00163836
CTC-325J23.2	0.0152284	0.07	5.98897	0.0143956
CTC-325N22.1	0.00507614	0.07	9.78993	0.0017547
CTC-327F10.4	0.00507614	0.09	13.8989	0.000192912
CTC-327F10.5	0.00507614	0.09	13.8989	0.000192912
CTC-329D1.2	0.0152284	0.105	12.5452	0.000397229
CTC-329D1.3	0.0203046	0.11	11.6217	0.000651875
CTC-329H14.1	0.00507614	0.075	10.8029	0.0010134
CTC-337B15.3	0.00507614	0.055	6.82123	0.00900807
CTC-339F2.2	0.0101523	0.095	12.618	0.000382051
CTC-340A15.2	0.00507614	0.04	4.00075	0.0454799
CTC-340I23.2	0.0101523	0.075	8.66157	0.00324991
CTC-345K18.2	0.0101523	0.09	11.61	0.000655997
CTC-347C20.1	0.0101523	0.06	5.85737	0.0155119
CTC-352D11.1	0.0101523	0.05	4.10246	0.042821
CTC-352J10.1	0.0152284	0.105	12.5452	0.000397229
CTC-359M8.1	0.0101523	0.09	11.61	0.000655997
CTC-359M8.3	0.0253807	0.095	7.28751	0.00694357
CTC-367F4.1	0.0101523	0.1	13.6371	0.000221755
CTC-369A16.2	0.0101523	0.1	13.6371	0.000221755
CTC-369M3.1	0.035533	0.135	11.3009	0.000774713
CTC-370J7.1	0.0101523	0.075	8.66157	0.00324991
CTC-386L14.1	0.0203046	0.1	9.73895	0.00180404
CTC-394G3.1	0.00507614	0.085	12.858	0.000336037
CTC-422A18.1	0.00507614	0.06	7.79769	0.00523132
CTC-425K20.1	0	0.055	9.19571	0.00242583
CTC-426D19.1	0.0101523	0.09	11.61	0.000655997
CTC-428G20.1	0.0101523	0.085	10.6138	0.00112245
CTC-428G20.2	0.0101523	0.095	12.618	0.000382051
CTC-428H11.2	0.00507614	0.06	7.79769	0.00523132
CTC-431G16.3	0.0101523	0.055	4.96579	0.0258534
CTC-431G16.4	0.0101523	0.055	4.96579	0.0258534
CTC-432M15.3	0.0253807	0.1	8.14306	0.00432262
CTC-436K13.1	0.0152284	0.08	7.77101	0.00530914
CTC-436K13.2	0.0203046	0.075	5.37042	0.020481
CTC-436K13.3	0.0203046	0.085	7.0503	0.00792519
CTC-436K13.4	0.0203046	0.075	5.37042	0.020481
CTC-436K13.5	0.0152284	0.08	7.77101	0.00530914
CTC-436K13.6	0.0203046	0.085	7.0503	0.00792519
CTC-439N6.1	0.0203046	0.085	7.0503	0.00792519
CTC-441N14.2	0.0253807	0.095	7.28751	0.00694357
CTC-441N14.4	0.0203046	0.085	7.0503	0.00792519
CTC-445B21.1	0.0253807	0.075	4.12306	0.0423026
CTC-447K7.1	0.0203046	0.09	7.92627	0.00487222
CTC-448D22.1	0.0152284	0.095	10.5892	0.0011375
CTC-455F18.3	0	0.05	8.17082	0.00425697
CTC-458I2.2	0.00507614	0.05	5.86061	0.0154834
CTC-459M5.1	0.0304569	0.1	6.74726	0.00938919
CTC-459M5.2	0.0304569	0.095	5.95541	0.0146722
CTC-467M3.2	0.00507614	0.07	9.78993	0.0017547
CTC-467M3.3	0.00507614	0.07	9.78993	0.0017547
CTC-471C19.1	0.00507614	0.04	4.00075	0.0454799
CTC-472C24.1	0.00507614	0.08	11.8258	0.000584144
CTC-480C2.1	0.0152284	0.06	4.30969	0.0378959
CTC-483L24.2	0.0304569	0.115	9.26468	0.00233615
CTC-484M2.1	0.0101523	0.07	7.70825	0.0054969
CTC-493L21.2	0	0.06	10.2275	0.00138363
CTC-493P15.2	0.0101523	0.105	14.6667	0.000128291
CTC-498M16.3	0	0.06	10.2275	0.00138363
CTC-499J9.1	0.0304569	0.105	7.56405	0.00595441
CTC-507E12.1	0.0101523	0.1	13.6371	0.000221755
CTC-512J14.5	0.0101523	0.05	4.10246	0.042821
CTC-529G1.1	0	0.06	10.2275	0.00138363
CTC-529I10.1	0.00507614	0.06	7.79769	0.00523132
CTC-529I10.2	0.0101523	0.06	5.85737	0.0155119
CTC-529L17.1	0.0152284	0.07	5.98897	0.0143956
CTC-529L17.2	0.0152284	0.07	5.98897	0.0143956
CTC-534B23.1	0.00507614	0.055	6.82123	0.00900807
CTC-535M15.2	0.00507614	0.04	4.00075	0.0454799
CTC-542B22.1	0.0152284	0.075	6.86881	0.0087713
CTC-542B22.2	0.0101523	0.065	6.77266	0.0092565
CTC-546K23.1	0.0101523	0.085	10.6138	0.00112245
CTC-548H10.2	0	0.08	14.4186	0.000146349
CTC-550M4.1	0	0.08	14.4186	0.000146349
CTC-551A13.2	0.00507614	0.085	12.858	0.000336037
CTC-552D5.1	0.0203046	0.105	10.6722	0.00108755
CTC-554D6.1	0.0152284	0.095	10.5892	0.0011375
CTC-575N7.1	0.0203046	0.1	9.73895	0.00180404
CTC-736O2.1	0.0304569	0.085	4.45643	0.0347702
CTC-756D1.3	0.0203046	0.115	12.5862	0.000388614
CTC-756D1.4	0.0203046	0.12	13.5647	0.000230476
CTC-789J18.1	0.0253807	0.105	9.01983	0.00267066
CTC-806A22.1	0.0152284	0.095	10.5892	0.0011375
CTD-2001C12.1	0.0101523	0.07	7.70825	0.0054969
CTD-2001E22.1	0	0.03	4.15446	0.0415249
CTD-2005H7.1	0.0152284	0.065	5.13461	0.0234533
CTD-2007H13.1	0.0101523	0.085	10.6138	0.00112245
CTD-2008O4.1	0.0253807	0.135	14.6471	0.000129635
CTD-2008P7.1	0.00507614	0.045	4.91895	0.0265636
CTD-2008P7.10	0.00507614	0.045	4.91895	0.0265636
CTD-2008P7.11	0.00507614	0.05	5.86061	0.0154834
CTD-2008P7.3	0.00507614	0.045	4.91895	0.0265636
CTD-2008P7.5	0.00507614	0.045	4.91895	0.0265636
CTD-2008P7.6	0.00507614	0.045	4.91895	0.0265636
CTD-2008P7.7	0.00507614	0.045	4.91895	0.0265636
CTD-2008P7.8	0.00507614	0.045	4.91895	0.0265636
CTD-2014D20.1	0.0253807	0.13	13.671	0.000217797
CTD-2015A6.1	0.0101523	0.05	4.10246	0.042821
CTD-2015A6.2	0.0101523	0.05	4.10246	0.042821
CTD-2015H6.3	0.00507614	0.05	5.86061	0.0154834
CTD-2016H9.1	0.0152284	0.075	6.86881	0.0087713
CTD-2019O4.1	0	0.03	4.15446	0.0415249
CTD-2020P22.1	0.00507614	0.085	12.858	0.000336037
CTD-2023J5.1	0.0203046	0.12	13.5647	0.000230476
CTD-2024I7.18	0.0304569	0.11	8.40377	0.00374444
CTD-2026D20.2	0.00507614	0.04	4.00075	0.0454799
CTD-2026D23.1	0.0152284	0.095	10.5892	0.0011375
CTD-2028E8.1	0	0.035	5.14356	0.0233328
CTD-2036A18.2	0.0101523	0.055	4.96579	0.0258534
CTD-2036J7.1	0.0304569	0.105	7.56405	0.00595441
CTD-2037K23.1	0	0.045	7.15328	0.00748269
CTD-2040G12.2	0.0304569	0.115	9.26468	0.00233615
CTD-2050E21.2	0.0101523	0.1	13.6371	0.000221755
CTD-2060C23.1	0.00507614	0.05	5.86061	0.0154834
CTD-2061E19.1	0.0253807	0.08	4.86983	0.0273302
CTD-2061E19.6	0.0253807	0.08	4.86983	0.0273302
CTD-2062A1.3	0.0101523	0.085	10.6138	0.00112245
CTD-2063L20.1	0	0.03	4.15446	0.0415249
CTD-2073O6.1	0.0101523	0.05	4.10246	0.042821
CTD-2091N23.1	0.0304569	0.085	4.45643	0.0347702
CTD-2095E4.3	0.0101523	0.055	4.96579	0.0258534
CTD-2095E4.4	0.0101523	0.055	4.96579	0.0258534
CTD-2095E4.5	0.0101523	0.055	4.96579	0.0258534
CTD-2110K23.1	0	0.055	9.19571	0.00242583
CTD-2123J17.2	0	0.06	10.2275	0.00138363
CTD-2128F4.1	0.0304569	0.105	7.56405	0.00595441
CTD-2145A24.4	0	0.065	11.2658	0.000789467
CTD-2145A24.5	0	0.065	11.2658	0.000789467
CTD-2151A2.2	0.0101523	0.075	8.66157	0.00324991
CTD-2151A2.3	0.0101523	0.075	8.66157	0.00324991
CTD-2154H6.1	0.0253807	0.1	8.14306	0.00432262
CTD-2158P22.1	0.00507614	0.085	12.858	0.000336037
CTD-2161E19.1	0.0304569	0.085	4.45643	0.0347702
CTD-2168K21.1	0.0152284	0.1	11.5603	0.000673751
CTD-2168K21.3	0.0304569	0.105	7.56405	0.00595441
CTD-2179L22.1	0.00507614	0.045	4.91895	0.0265636
CTD-2182N23.1	0.035533	0.14	12.2049	0.000476631
CTD-2185K10.1	0	0.03	4.15446	0.0415249
CTD-2194F4.2	0.00507614	0.05	5.86061	0.0154834
CTD-2195M15.1	0.0101523	0.085	10.6138	0.00112245
CTD-2195M15.3	0.0203046	0.085	7.0503	0.00792519
CTD-2195M15.4	0.0101523	0.085	10.6138	0.00112245
CTD-2197I11.1	0.00507614	0.075	10.8029	0.0010134
CTD-2200P10.3	0	0.04	6.14381	0.0131873
CTD-2206N4.1	0.0101523	0.06	5.85737	0.0155119
CTD-2206N4.5	0.0101523	0.06	5.85737	0.0155119
CTD-2215E18.2	0.0101523	0.07	7.70825	0.0054969
CTD-2215E18.3	0.0101523	0.07	7.70825	0.0054969
CTD-2215E18.4	0.0101523	0.07	7.70825	0.0054969
CTD-2218K11.2	0.00507614	0.055	6.82123	0.00900807
CTD-2227C6.2	0	0.05	8.17082	0.00425697
CTD-2227C6.3	0.00507614	0.05	5.86061	0.0154834
CTD-2232E5.2	0.00507614	0.065	8.78779	0.00303253
CTD-2244C20.2	0	0.04	6.14381	0.0131873
CTD-2249K22.3	0.00507614	0.045	4.91895	0.0265636
CTD-2260A17.1	0.0152284	0.085	8.69308	0.00319421
CTD-2260A17.2	0.0152284	0.085	8.69308	0.00319421
CTD-2266L18.2	0.0101523	0.065	6.77266	0.0092565
CTD-2267D19.1	0.0253807	0.08	4.86983	0.0273302
CTD-2267D19.3	0.0253807	0.08	4.86983	0.0273302
CTD-2267D19.7	0.0253807	0.08	4.86983	0.0273302
CTD-2267D19.8	0.0152284	0.07	5.98897	0.0143956
CTD-2272D18.1	0.0203046	0.115	12.5862	0.000388614
CTD-2275D10.2	0.0101523	0.06	5.85737	0.0155119
CTD-2278B20.1	0	0.07	12.3106	0.000450403
CTD-2280E9.1	0.0152284	0.08	7.77101	0.00530914
CTD-2283N19.1	0.0152284	0.1	11.5603	0.000673751
CTD-2284J15.1	0.0253807	0.115	10.8305	0.000998394
CTD-2287O16.1	0.00507614	0.09	13.8989	0.000192912
CTD-2287O16.4	0.00507614	0.09	13.8989	0.000192912
CTD-2287O16.5	0.00507614	0.09	13.8989	0.000192912
CTD-2292N2.1	0.0152284	0.07	5.98897	0.0143956
CTD-2292P10.2	0.035533	0.135	11.3009	0.000774713
CTD-2296D1.1	0	0.03	4.15446	0.0415249
CTD-2297M2.1	0	0.065	11.2658	0.000789467
CTD-2304L4.1	0.0203046	0.08	6.19745	0.0127935
CTD-2308B18.2	0.0101523	0.08	9.63062	0.0019136
CTD-2308B18.3	0.0101523	0.08	9.63062	0.0019136
CTD-2308B18.4	0.00507614	0.08	11.8258	0.000584144
CTD-2308N23.3	0.00507614	0.04	4.00075	0.0454799
CTD-2308N23.4	0.00507614	0.04	4.00075	0.0454799
CTD-2308N23.5	0.00507614	0.04	4.00075	0.0454799
CTD-2309H9.3	0.035533	0.135	11.3009	0.000774713
CTD-2309O5.3	0.0152284	0.06	4.30969	0.0378959
CTD-2311A18.1	0.0253807	0.1	8.14306	0.00432262
CTD-2315M5.2	0	0.03	4.15446	0.0415249
CTD-2320G14.2	0.0253807	0.125	12.7089	0.000363912
CTD-2325B11.1	0	0.03	4.15446	0.0415249
CTD-2331C18.5	0	0.045	7.15328	0.00748269
CTD-2331D11.2	0	0.055	9.19571	0.00242583
CTD-2331D11.3	0	0.055	9.19571	0.00242583
CTD-2331D11.4	0	0.055	9.19571	0.00242583
CTD-2334D19.1	0.0152284	0.085	8.69308	0.00319421
CTD-2336O2.1	0.0253807	0.135	14.6471	0.000129635
CTD-2336O2.3	0.0253807	0.135	14.6471	0.000129635
CTD-2337A12.1	0	0.07	12.3106	0.000450403
CTD-2340D6.1	0.0152284	0.105	12.5452	0.000397229
CTD-2340E1.2	0	0.08	14.4186	0.000146349
CTD-2342N23.1	0.035533	0.12	8.69764	0.00318622
CTD-2342N23.3	0.0304569	0.115	9.26468	0.00233615
CTD-2345M20.3	0.0203046	0.11	11.6217	0.000651875
CTD-2349P21.11	0.0101523	0.07	7.70825	0.0054969
CTD-2350C19.2	0	0.05	8.17082	0.00425697
CTD-2363C16.1	0.0203046	0.095	8.8231	0.00297441
CTD-2363C16.2	0.0203046	0.095	8.8231	0.00297441
CTD-2370N5.3	0.00507614	0.08	11.8258	0.000584144
CTD-2373J6.2	0.00507614	0.06	7.79769	0.00523132
CTD-2374C24.1	0.0203046	0.09	7.92627	0.00487222
CTD-2375G15.1	0	0.035	5.14356	0.0233328
CTD-2410N18.1	0.0203046	0.1	9.73895	0.00180404
CTD-2410N18.4	0.0203046	0.095	8.8231	0.00297441
CTD-2410N18.5	0.00507614	0.095	14.9481	0.000110511
CTD-2501B8.1	0.0101523	0.06	5.85737	0.0155119
CTD-2501M5.1	0.0253807	0.13	13.671	0.000217797
CTD-2503O16.5	0.0101523	0.065	6.77266	0.0092565
CTD-2510L9.2	0	0.04	6.14381	0.0131873
CTD-2516F10.2	0	0.05	8.17082	0.00425697
CTD-2516F10.4	0.00507614	0.045	4.91895	0.0265636
CTD-2526L21.2	0.0253807	0.09	6.45515	0.0110631
CTD-2526L21.3	0.0253807	0.09	6.45515	0.0110631
CTD-2530N21.4	0.0253807	0.12	11.7618	0.000604578
CTD-2530N21.5	0.0304569	0.115	9.26468	0.00233615
CTD-2530N21.6	0.0253807	0.115	10.8305	0.000998394
CTD-2534H9.1	0.0101523	0.06	5.85737	0.0155119
CTD-2534J5.1	0.035533	0.13	10.4142	0.00125047
CTD-2541M15.3	0.0304569	0.135	12.8932	0.000329772
CTD-2545G14.2	0.0101523	0.09	11.61	0.000655997
CTD-2545G14.7	0.0152284	0.095	10.5892	0.0011375
CTD-2545H1.2	0.0203046	0.085	7.0503	0.00792519
CTD-2547H18.1	0.00507614	0.055	6.82123	0.00900807
CTD-2547L16.1	0.0253807	0.12	11.7618	0.000604578
CTD-2547L16.3	0.0203046	0.115	12.5862	0.000388614
CTD-2560E9.3	0	0.045	7.15328	0.00748269
CTD-2560E9.5	0.00507614	0.04	4.00075	0.0454799
CTD-2562J17.4	0.00507614	0.04	4.00075	0.0454799
CTD-2562J17.6	0.00507614	0.04	4.00075	0.0454799
CTD-2562J17.7	0.00507614	0.04	4.00075	0.0454799
CTD-2562J17.9	0.00507614	0.04	4.00075	0.0454799
CTD-2579L12.1	0.00507614	0.05	5.86061	0.0154834
CTD-2587M2.1	0.0101523	0.08	9.63062	0.0019136
CTD-2587M2.2	0.0101523	0.085	10.6138	0.00112245
CTD-2588J1.1	0.035533	0.135	11.3009	0.000774713
CTD-3012A18.1	0.0101523	0.05	4.10246	0.042821
CTD-3014M21.1	0.00507614	0.05	5.86061	0.0154834
CTD-3022L24.1	0	0.03	4.15446	0.0415249
CTD-3023L14.1	0.035533	0.13	10.4142	0.00125047
CTD-3023L14.2	0.035533	0.13	10.4142	0.00125047
CTD-3023L14.3	0.035533	0.13	10.4142	0.00125047
CTD-3046C4.1	0.0152284	0.115	14.5528	0.000136286
CTD-3064M3.3	0.035533	0.135	11.3009	0.000774713
CTD-3064M3.4	0.035533	0.135	11.3009	0.000774713
CTD-3064M3.7	0.035533	0.135	11.3009	0.000774713
CTD-3065J16.12	0.035533	0.135	11.3009	0.000774713
CTD-3065J16.9	0.035533	0.135	11.3009	0.000774713
CTD-3074O7.11	0	0.035	5.14356	0.0233328
CTD-3074O7.13	0	0.035	5.14356	0.0233328
CTD-3074O7.2	0	0.035	5.14356	0.0233328
CTD-3074O7.5	0.00507614	0.04	4.00075	0.0454799
CTD-3074O7.7	0	0.035	5.14356	0.0233328
CTD-3080F16.3	0.0253807	0.1	8.14306	0.00432262
CTD-3091F23.1	0.0203046	0.12	13.5647	0.000230476
CTD-3096M3.2	0.00507614	0.04	4.00075	0.0454799
CTD-3107M8.1	0.0152284	0.105	12.5452	0.000397229
CTD-3118D11.2	0.0304569	0.135	12.8932	0.000329772
CTD-3157E16.2	0.0253807	0.08	4.86983	0.0273302
CTD-3193K9.1	0.0253807	0.075	4.12306	0.0423026
CTD-3193K9.11	0.0253807	0.075	4.12306	0.0423026
CTD-3193K9.3	0.0203046	0.07	4.57258	0.0324876
CTD-3194G12.2	0.0152284	0.065	5.13461	0.0234533
CTD-3195I5.4	0.0203046	0.075	5.37042	0.020481
CTD-3199J23.6	0.00507614	0.055	6.82123	0.00900807
CTD-3224K15.3	0.0101523	0.085	10.6138	0.00112245
CTD-3244O18.5	0.0203046	0.095	8.8231	0.00297441
CTD-3247F14.2	0.0304569	0.13	11.9606	0.000543364
CTD-3247F14.3	0.0304569	0.13	11.9606	0.000543364
CTHRC1	0.0253807	0.12	11.7618	0.000604578
CTNNA1	0.0203046	0.11	11.6217	0.000651875
CTNNBIP1	0	0.035	5.14356	0.0233328
CTSF	0	0.035	5.14356	0.0233328
CTSG	0	0.03	4.15446	0.0415249
CTTNBP2	0.0203046	0.11	11.6217	0.000651875
CTXN3	0	0.08	14.4186	0.000146349
CUL1	0.0203046	0.12	13.5647	0.000230476
CUX1	0.0203046	0.095	8.8231	0.00297441
CWF19L2	0.0101523	0.055	4.96579	0.0258534
CXADR	0.0253807	0.08	4.86983	0.0273302
CXCL10	0.00507614	0.04	4.00075	0.0454799
CXCL11	0.00507614	0.045	4.91895	0.0265636
CXCL12	0	0.03	4.15446	0.0415249
CXCL14	0.0203046	0.105	10.6722	0.00108755
CXCL9	0.00507614	0.04	4.00075	0.0454799
CXCR5	0.0152284	0.06	4.30969	0.0378959
CXXC5	0.0101523	0.085	10.6138	0.00112245
CXXC5-AS1	0.0101523	0.085	10.6138	0.00112245
CYB561	0.00507614	0.04	4.00075	0.0454799
CYB561A3	0.00507614	0.04	4.00075	0.0454799
CYB5D1	0.0253807	0.08	4.86983	0.0273302
CYB5D2	0.0152284	0.06	4.30969	0.0378959
CYB5R1	0.00507614	0.045	4.91895	0.0265636
CYB5R2	0.00507614	0.045	4.91895	0.0265636
CYB5R3	0.0101523	0.05	4.10246	0.042821
CYC1	0.035533	0.135	11.3009	0.000774713
CYCS	0.0152284	0.075	6.86881	0.0087713
CYCSP19	0.035533	0.115	7.87015	0.00502575
CYCSP20	0.0253807	0.115	10.8305	0.000998394
CYCSP24	0	0.03	4.15446	0.0415249
CYCSP25	0	0.04	6.14381	0.0131873
CYCSP27	0.00507614	0.045	4.91895	0.0265636
CYCSP29	0.0152284	0.065	5.13461	0.0234533
CYFIP2	0.00507614	0.07	9.78993	0.0017547
CYP11B1	0.0304569	0.135	12.8932	0.000329772
CYP11B2	0.035533	0.135	11.3009	0.000774713
CYP2D6	0	0.035	5.14356	0.0233328
CYP2D7	0	0.035	5.14356	0.0233328
CYP2D8P	0	0.035	5.14356	0.0233328
CYP2J2	0	0.03	4.15446	0.0415249
CYP2W1	0.035533	0.105	6.28441	0.0121805
CYP3A137P	0.0101523	0.09	11.61	0.000655997
CYP3A4	0.0101523	0.085	10.6138	0.00112245
CYP3A43	0.0101523	0.085	10.6138	0.00112245
CYP3A5	0.0152284	0.095	10.5892	0.0011375
CYP3A51P	0.0203046	0.095	8.8231	0.00297441
CYP3A7	0.0203046	0.095	8.8231	0.00297441
CYP3A7-CYP3A51P	0.0203046	0.095	8.8231	0.00297441
CYP4A22	0	0.03	4.15446	0.0415249
CYP4A22-AS1	0	0.03	4.15446	0.0415249
CYP4B1	0.00507614	0.04	4.00075	0.0454799
CYP4V2	0.0101523	0.05	4.10246	0.042821
CYP4X1	0	0.035	5.14356	0.0233328
CYP4Z1	0	0.03	4.15446	0.0415249
CYP51A1	0.035533	0.11	7.06516	0.00785974
CYP51A1-AS1	0.035533	0.11	7.06516	0.00785974
CYP7A1	0.0304569	0.125	11.0443	0.00088959
CYP7B1	0.0101523	0.105	14.6667	0.000128291
CYREN	0.0203046	0.105	10.6722	0.00108755
CYSTM1	0.0152284	0.105	12.5452	0.000397229
CYTH3	0.0203046	0.075	5.37042	0.020481
CYYR1	0.0152284	0.07	5.98897	0.0143956
CYYR1-AS1	0.0253807	0.08	4.86983	0.0273302
D21S2088E	0.00507614	0.07	9.78993	0.0017547
DAGLA	0	0.05	8.17082	0.00425697
DALRD3	0	0.03	4.15446	0.0415249
DBF4	0.035533	0.105	6.28441	0.0121805
DBF4B	0.00507614	0.045	4.91895	0.0265636
DBIL5P2	0	0.03	4.15446	0.0415249
DBIP2	0.0203046	0.07	4.57258	0.0324876
DBNL	0.0253807	0.095	7.28751	0.00694357
DBX1	0.00507614	0.045	4.91895	0.0265636
DCAF13	0.0304569	0.125	11.0443	0.00088959
DCAF13P1	0.0203046	0.105	10.6722	0.00108755
DCAF4L2	0.0253807	0.13	13.671	0.000217797
DCAKD	0.0101523	0.05	4.10246	0.042821
DCANP1	0.0152284	0.105	12.5452	0.000397229
DCDC2B	0	0.03	4.15446	0.0415249
DCK	0	0.03	4.15446	0.0415249
DCP2	0.00507614	0.085	12.858	0.000336037
DCSTAMP	0.0253807	0.115	10.8305	0.000998394
DCTN4	0.0101523	0.09	11.61	0.000655997
DDC	0.0253807	0.095	7.28751	0.00694357
DDC-AS1	0.0152284	0.095	10.5892	0.0011375
DDIAS	0.00507614	0.04	4.00075	0.0454799
DDX17	0	0.045	7.15328	0.00748269
DDX18P4	0	0.075	13.3615	0.000256841
DDX25	0.0152284	0.06	4.30969	0.0378959
DDX3ILA1	0.00507614	0.08	11.8258	0.000584144
DDX41	0	0.035	5.14356	0.0233328
DDX42	0	0.03	4.15446	0.0415249
DDX43P1	0.00507614	0.09	13.8989	0.000192912
DDX43P3	0.0203046	0.075	5.37042	0.020481
DDX5	0	0.03	4.15446	0.0415249
DDX56	0.035533	0.095	4.80396	0.0283944
DECR1	0.0253807	0.12	11.7618	0.000604578
DEFA6	0.0304569	0.125	11.0443	0.00088959
DEFB117	0	0.03	4.15446	0.0415249
DEFB118	0	0.03	4.15446	0.0415249
DEFB119	0	0.03	4.15446	0.0415249
DELE1	0.0101523	0.095	12.618	0.000382051
DENND2A	0.0304569	0.13	11.9606	0.000543364
DENND3	0.0253807	0.13	13.671	0.000217797
DEPDC5	0.00507614	0.04	4.00075	0.0454799
DEPTOR	0.035533	0.12	8.69764	0.00318622
DERL1	0.0304569	0.14	13.8413	0.000198919
DESI1	0.00507614	0.045	4.91895	0.0265636
DFFA	0.00507614	0.055	6.82123	0.00900807
DGAT2L7P	0.0152284	0.115	14.5528	0.000136286
DGCR11	0	0.045	7.15328	0.00748269
DGCR12	0	0.045	7.15328	0.00748269
DGCR2	0	0.045	7.15328	0.00748269
DGCR5	0	0.045	7.15328	0.00748269
DGCR6	0	0.045	7.15328	0.00748269
DGCR6L	0	0.045	7.15328	0.00748269
DGCR8	0	0.045	7.15328	0.00748269
DGKI	0.035533	0.125	9.54611	0.00200373
DGKZ	0.00507614	0.045	4.91895	0.0265636
DHCR7	0.0152284	0.06	4.30969	0.0378959
DHFR	0.0152284	0.07	5.98897	0.0143956
DHRS11	0.0101523	0.055	4.96579	0.0258534
DHRS7C	0.0253807	0.08	4.86983	0.0273302
DHX40	0.0101523	0.05	4.10246	0.042821
DHX58	0.00507614	0.05	5.86061	0.0154834
DHX8	0	0.04	6.14381	0.0131873
DIAPH1	0.0304569	0.1	6.74726	0.00938919
DIAPH1-AS1	0.0304569	0.095	5.95541	0.0146722
DIRAS3	0.00507614	0.045	4.91895	0.0265636
DIRC1	0	0.03	4.15446	0.0415249
DIXDC1	0.00507614	0.04	4.00075	0.0454799
DKK4	0.0101523	0.105	14.6667	0.000128291
DLAT	0.00507614	0.04	4.00075	0.0454799
DLD	0.035533	0.11	7.06516	0.00785974
DLG2	0.00507614	0.04	4.00075	0.0454799
DLG4	0.00507614	0.09	13.8989	0.000192912
DLGAP1	0	0.045	7.15328	0.00748269
DLGAP1-AS1	0	0.045	7.15328	0.00748269
DLGAP1-AS2	0	0.035	5.14356	0.0233328
DLGAP1-AS3	0.00507614	0.05	5.86061	0.0154834
DLGAP1-AS4	0.00507614	0.045	4.91895	0.0265636
DLGAP2	0.0253807	0.12	11.7618	0.000604578
DLGAP2-AS1	0.0253807	0.13	13.671	0.000217797
DLX3	0.00507614	0.06	7.79769	0.00523132
DLX4	0.0152284	0.06	4.30969	0.0378959
DLX5	0.0203046	0.115	12.5862	0.000388614
DLX6	0.0253807	0.115	10.8305	0.000998394
DLX6-AS1	0.0152284	0.105	12.5452	0.000397229
DMC1	0	0.045	7.15328	0.00748269
DMTF1	0.0152284	0.08	7.77101	0.00530914
DMTN	0.0203046	0.125	14.5566	0.000136012
DMXL1	0.0203046	0.095	8.8231	0.00297441
DNAAF5	0.035533	0.1	5.5299	0.0186942
DNAH11	0.0253807	0.1	8.14306	0.00432262
DNAH2	0.0253807	0.095	7.28751	0.00694357
DNAH9	0.0152284	0.06	4.30969	0.0378959
[truncated: 2,639 more rows]
