# Supplementary material for: Novel Prognostic Signature for Acute Myeloid Leukemia: Bioinformatics Analysis of Combined CNV-Driven and Ferroptosis-Related Genes
Source: Front Genet. 2022 Apr 26;13:849437. doi: 10.3389/fgene.2022.849437 (PMC9086455; doi:10.3389/fgene.2022.849437)
Supplement: Supplementary file 5 [file Table15.XLSX]

## Sheet: risk
id	futime	fustat	DNAJB6	HSPB1	riskScore	risk
GSM924440	0.060274	1	7.33	7.83	0.659298	low
GSM924441	0.816438	1	8.35	8.29	0.761593	low
GSM924443	0.0657534	1	9.44	9.9	1.34241	high
GSM924444	0.00547945	1	8.6	9.89	1.36584	high
GSM924445	0.69863	1	9	10.42	1.64433	high
GSM924446	2.90959	1	7	9.38	1.17772	high
GSM924447	0.580822	1	6.91	10.53	1.80427	high
GSM924448	9.59452	0	8.37	8.16	0.725561	low
GSM924449	0.109589	1	7.35	10.16	1.55681	high
GSM924450	0.265753	1	8	7.98	0.685245	low
GSM924451	1.30685	1	8.14	8.02	0.693005	low
GSM924452	1.04658	0	7.95	9.87	1.37801	high
GSM924453	0.0438356	1	8.46	9.84	1.34558	high
GSM924454	7.54795	0	8.86	9.26	1.07553	high
GSM924455	0.99726	1	9.43	7.2	0.495831	low
GSM924456	0.394521	1	8.18	9.48	1.18648	high
GSM924457	0.452055	1	8.18	9.01	0.997572	high
GSM924458	6.01918	0	8.28	8.95	0.973294	low
GSM924459	0.0493151	1	7.51	9.32	1.13735	high
GSM924460	0.117808	1	8	9.5	1.20065	high
GSM924461	8.05479	0	8.64	8.92	0.953958	low
GSM924462	1.43014	1	8.99	10.62	1.7707	high
GSM924463	0.39726	1	8.63	8.73	0.889593	low
GSM924464	3.14795	0	7.29	10.07	1.50822	high
GSM924465	5.89041	0	7.7	9.78	1.34135	high
GSM924466	1.29315	1	9.19	9.24	1.05886	high
GSM924467	7.11781	0	8.78	9.76	1.29603	high
GSM924468	0.8	1	9.54	11.14	2.11594	high
GSM924469	0.835616	1	7.24	7.76	0.643934	low
GSM924470	0.830137	1	8.98	9.72	1.27067	high
GSM924471	0.0136986	1	9.13	10.66	1.79075	high
GSM924472	1.93699	0	9	10.66	1.79658	high
GSM924473	0.00821918	1	9.52	9.5	1.1559	high
GSM924474	4.59452	1	8.25	7.3	0.529866	low
GSM924475	0.0136986	1	8.84	9.43	1.14573	high
GSM924476	7.99178	0	7.38	8.64	0.887845	low
GSM924477	0.224658	1	9.12	10.1	1.45683	high
GSM924478	1.52055	1	7.71	8.98	0.998248	high
GSM924479	0.315068	1	9.63	9.3	1.07072	high
GSM924480	0.147945	1	8.64	9.44	1.15573	high
GSM924481	8.08219	1	8.38	8.23	0.744359	low
GSM924482	2.52877	1	8.38	10.01	1.43555	high
GSM924483	0.882192	1	9.81	10.03	1.39541	high
GSM924484	6.13425	0	9.69	9.86	1.3145	high
GSM924485	1.06575	1	6.52	8.13	0.751531	low
GSM924486	2.09041	0	9.46	8.68	0.855401	low
GSM924487	4.76986	1	8.56	8.58	0.843168	low
GSM924488	3.06849	1	8.35	8.11	0.712654	low
GSM924489	1.2	1	8.78	9.79	1.31046	high
GSM924490	1.48219	1	8.72	9.63	1.23718	high
GSM924491	0.342466	1	8.37	11.38	2.38046	high
GSM924492	7.08493	0	7.18	7.07	0.499947	low
GSM924493	0.10137	1	7.2	9.08	1.04906	high
GSM924494	0.271233	0	7.15	8.97	1.00859	high
GSM924495	0.0767123	1	8.1	7.95	0.67601	low
GSM924496	5.7863	0	6.82	9.01	1.03206	high
GSM924497	4.08767	1	8.83	10.6	1.76473	high
GSM924498	9.21096	0	6.69	8.42	0.832862	low
GSM924499	0.158904	1	8.23	7.78	0.63285	low
GSM924500	3.1726	1	7.73	8.62	0.873641	low
GSM924501	0.276712	1	6.13	8.76	0.95749	low
GSM924502	1.98082	1	7.56	8.47	0.830122	low
GSM924503	6.15616	1	6.49	8.95	1.01783	high
GSM924504	7.92877	0	7.52	9.21	1.09183	high
GSM924505	0.99726	1	8.34	9.56	1.21714	high
GSM924506	3.23562	1	7.29	8.36	0.802501	low
GSM924507	8.29041	0	10.01	7.69	0.585542	low
GSM924508	3.20548	0	9.15	8.13	0.70372	low
GSM924509	3.10137	0	9.39	8.25	0.73118	low
GSM924510	7.72055	0	8.5	9.77	1.30996	high
GSM924511	10.737	0	8.9	7.99	0.67248	low
GSM924512	0.465753	1	8.38	7.67	0.605404	low
GSM924513	1.08767	1	8.54	8.62	0.856133	low
GSM924514	0.367123	1	8.34	8.62	0.860423	low
GSM924515	7.39452	0	8.82	8.56	0.831548	low
GSM924516	0.726027	1	9.31	8.43	0.782955	low
GSM924517	8.49041	0	8.08	8.27	0.761112	low
GSM924518	2.23562	1	8.55	6.5	0.391484	low
GSM924519	3.50685	1	8.11	8.02	0.693524	low
GSM924520	3.56986	1	7.19	9.38	1.17214	high
GSM924521	0.586301	1	8.78	8.55	0.829314	low
GSM924522	8.11781	0	8.99	7.21	0.503167	low
GSM924524	8.23836	0	9.32	8.44	0.785653	low
GSM924525	0.10411	1	9.05	9.37	1.11478	high
GSM924526	10.0795	0	9.27	8.48	0.798331	low
GSM924527	1.42192	1	6.68	9.32	1.16119	high
GSM924528	1.3726	1	6.66	7.78	0.658176	low
GSM924529	0.684932	1	8.45	12.41	3.47412	high
GSM924530	0.0712329	1	7.58	8.29	0.776391	low
GSM924532	0.413699	1	7.67	8.91	0.973768	low
GSM924533	0.605479	1	6.91	9.77	1.36306	high
GSM924534	0.627397	1	7.86	9.76	1.32618	high
GSM924535	6.66575	1	8.08	9.1	1.03384	high
GSM924536	1.64932	1	9.34	11	2.01948	high
GSM924537	0.394521	1	7.36	8.14	0.738638	low
GSM924538	0.463014	1	7.45	7.39	0.55882	low
GSM924539	0.145205	0	9.02	7.71	0.604656	low
GSM924540	2.99452	1	9.14	10.55	1.7191	high
GSM924541	0.219178	1	7.5	10.12	1.52826	high
GSM924542	0.657534	1	6.9	8.33	0.801441	low
GSM924543	0.964384	1	8.92	9.66	1.24472	high
GSM924544	7.25753	0	8.05	8.62	0.866682	low
GSM924545	0.712329	1	8.37	9.31	1.10906	high
GSM924546	0.865753	1	7.44	9.09	1.04664	high
GSM924547	1.70959	1	8.59	7.78	0.627181	low
GSM924548	8.36438	0	6.28	9.13	1.09344	high
GSM924549	0.00821918	1	8.2	8.52	0.832161	low
GSM924550	3.24384	0	7.4	7.4	0.561587	low
GSM924551	0.942466	1	6.8	8.8	0.955591	low
GSM924552	3.54795	1	6.47	9.12	1.08426	high
GSM924553	8.05205	0	7.05	7.41	0.568615	low
GSM924554	1.2137	1	7.73	9.61	1.25885	high
GSM924555	0.205479	1	5.44	8.56	0.904847	low
GSM924556	2.19452	1	6.1	9.49	1.25441	high
GSM924557	7.37808	0	6.54	8.43	0.83908	low
GSM924558	9.50137	0	6.82	8.07	0.729585	low
GSM924559	0.0520548	1	6.25	8.73	0.944114	low
GSM924560	8.9726	0	7.94	8.84	0.942557	low
GSM924561	1.34247	1	7.73	9.74	1.32071	high
GSM924562	1.84932	1	9.12	9.45	1.14617	high
GSM924563	8.16164	0	7.72	7.23	0.523241	low
GSM924564	1.40548	1	6.6	9.28	1.14646	high
GSM924565	0.0876712	1	7.47	10.53	1.77919	high
GSM924566	0.158904	1	9.33	9.08	0.994669	low
GSM924567	0.131507	1	8.11	10.25	1.57909	high
GSM924568	3.46027	0	6.06	7.75	0.660765	low
GSM924569	1.66301	1	8.69	8.42	0.792253	low
GSM924570	2.16164	1	7.96	8.71	0.897964	low
GSM924572	0.0958904	1	8.56	8.22	0.738289	low
GSM924573	1.50137	1	7.16	8.69	0.909363	low
GSM924574	1.11507	0	7.38	8.73	0.917823	low
GSM924575	0.372603	1	9.29	10.17	1.48861	high
GSM924576	0.263014	1	8.98	10.12	1.47276	high
GSM924577	0.128767	1	8.92	10.61	1.76727	high
GSM924578	0.936986	1	7.69	8.78	0.927698	low
GSM924579	0.309589	1	8.91	10.65	1.794	high
