# Supplementary material for: Novel Prognostic Signature for Acute Myeloid Leukemia: Bioinformatics Analysis of Combined CNV-Driven and Ferroptosis-Related Genes
Source: Front Genet. 2022 Apr 26;13:849437. doi: 10.3389/fgene.2022.849437 (PMC9086455; doi:10.3389/fgene.2022.849437)
Supplement: Supplementary file 7 [file Table6.xlsx]

## Sheet: down_genes_go
Supplementary Table 4. Downregulated DEGs in GO analysis.
ONTOLOGY	ID	Description	GeneRatio	BgRatio	pvalue	p.adjust	qvalue	geneID	Count
BP	GO:0002283	neutrophil activation involved in immune response	209/2907	490/18866	1.18182e-48	4.81205e-45	3.91471e-45	968/30/25798/1084/3577/53916/3310/2215/5719/8907/527/2495/1460/11025/53917/4318/222487/54509/56888/6813/4831/6286/64386/8993/3579/28988/5683/3043/6556/84418/5004/5223/2357/3240/1667/2358/8635/3163/728358/1/25797/8778/5547/81619/51382/10043/9961/64333/306/9218/4758/1512/10450/121260/4311/29099/2212/57126/8566/226/2512/634/3934/11240/383/10092/5908/230/23406/374403/2352/5265/9798/1118/79792/8972/33…	209
BP	GO:0043312	neutrophil degranulation	208/2907	487/18866	1.55378e-48	4.81205e-45	3.91471e-45	968/30/25798/1084/3577/53916/3310/2215/5719/8907/527/2495/1460/11025/53917/4318/222487/54509/56888/6813/4831/6286/64386/8993/3579/28988/5683/3043/6556/84418/5004/5223/2357/3240/1667/2358/8635/3163/728358/1/25797/8778/5547/81619/51382/10043/9961/64333/306/9218/4758/1512/10450/121260/4311/29099/2212/57126/8566/226/2512/634/3934/11240/383/10092/5908/230/23406/374403/2352/5265/9798/1118/79792/8972/33…	208
BP	GO:0042110	T cell activation	153/2907	483/18866	9.26571e-20	1.91306e-16	1.55631e-16	7494/11277/79840/135/27040/6556/23210/2213/653519/51463/5590/27166/6794/9402/8379/634/22914/51571/3566/572/55716/120425/383/26253/604/8740/8764/602/5699/567/926/5914/11035/10326/1604/2281/283234/3659/11314/64343/654346/3958/3932/10312/23308/27240/58515/2534/101/3142/1051/5971/8809/939/4063/896/55423/8772/2064/3600/10288/3280/923/1378/581/11006/3702/975/64115/9092/51176/677/4092/201633/925/639/693…	153
BP	GO:0001819	positive regulation of cytokine production	136/2907	447/18866	4.41795e-16	6.84119e-13	5.56545e-13	5435/7494/5603/7353/1652/6397/3134/2867/81030/6556/5004/3603/4155/5590/9958/5336/4050/353514/10211/22914/51571/26253/4049/8764/79792/602/10542/3303/5434/567/5914/26007/283234/3659/8877/25865/10855/4791/63940/728/11027/58515/3554/101/1051/8809/4063/54106/1191/8772/958/3600/10288/1535/923/10666/3661/975/2865/201633/10417/5450/3805/246778/5196/10859/2219/29126/916/3304/834/2207/64581/718/8692/56253/…	136
BP	GO:0050863	regulation of T cell activation	109/2907	332/18866	1.236e-15	1.53116e-12	1.24563e-12	7494/11277/135/27040/2213/5590/27166/9402/8379/634/22914/51571/3566/572/383/604/8740/8764/5914/11035/10326/1604/283234/3659/11314/654346/3958/3932/23308/27240/58515/2534/101/3142/1051/939/55423/8772/2064/3600/10288/3280/923/1378/11006/975/64115/9092/51176/4092/201633/639/6932/30009/246778/80149/10859/29126/1803/916/207/57864/1840/8651/399/100133941/814/9750/7535/56253/100528032/3594/64127/3105/29…	109
BP	GO:0002697	regulation of immune effector process	135/2907	470/18866	8.16221e-14	8.42612e-11	6.85482e-11	7494/11277/7353/6397/3134/2867/6813/5094/8993/8807/27202/2213/5590/409/3537/9958/28893/6810/57126/634/22914/10459/51571/3566/383/720/60489/604/4049/8764/9437/721/28921/567/5914/11035/26007/640/1604/56848/11314/3958/8741/3106/728/58515/3554/715/3162/933/3142/259197/8809/54106/1191/8772/958/3600/5654/10666/1378/56833/388077/5199/149840/975/2865/966/4092/10417/30009/3805/246778/80149/10859/117157/22…	135
BP	GO:0007159	leukocyte cell-cell adhesion	109/2907	364/18866	1.17513e-12	1.03982e-09	8.45916e-10	7494/135/2213/5590/9402/57126/10318/8379/634/22914/51571/3566/572/383/604/8740/8764/5914/10326/1604/283234/3659/11314/654346/3958/7264/10507/3932/23308/58515/2534/101/3142/1051/939/55423/8772/2064/6280/3600/10288/3280/923/240/11006/84830/975/64115/9092/51176/4092/201633/30009/8631/80149/10859/29126/1803/916/207/1840/8651/399/100133941/9750/6793/7535/56253/2529/100528032/3383/3594/64127/6279/3105/…	109
BP	GO:0031349	positive regulation of defense response	112/2907	385/18866	4.5252e-12	3.49398e-09	2.84243e-09	8517/5715/6500/5700/5603/5719/1652/3134/2867/81030/9782/8807/5683/3385/5687/5698/3603/2358/5595/5566/9958/5336/8717/10318/353514/22914/383/26253/4049/5699/10133/5138/5359/3384/6622/63940/11027/2534/5710/101/84166/1051/5971/259197/54106/8772/6280/3600/1535/923/10666/6283/3661/5894/120892/200958/2161/975/2865/3805/2219/9491/1075/3055/9861/117157/2207/64581/718/8692/56253/7052/100528032/338339/83666…	112
BP	GO:0002831	regulation of response to biotic stimulus	117/2907	409/18866	5.07683e-12	3.49398e-09	2.84243e-09	8517/5715/11277/6500/5700/5719/7353/6397/3134/2867/81030/9782/5094/22933/8807/5683/3385/5687/5698/2213/2358/5595/5566/409/9958/60343/5336/634/22914/383/26253/60489/9437/5699/114769/26007/1604/4795/10133/3659/5359/3106/3384/11027/58515/2534/5710/101/84166/5971/259197/8772/3600/5654/1535/10666/1378/56833/3661/5894/200958/3805/246778/80149/10859/2219/29126/10906/9491/3055/8651/3460/9861/4057/117157/…	117
BP	GO:1903037	regulation of leukocyte cell-cell adhesion	99/2907	329/18866	9.31295e-12	5.76844e-09	4.69275e-09	7494/135/2213/5590/9402/8379/634/22914/51571/3566/572/383/604/8740/8764/5914/10326/1604/283234/3659/11314/654346/3958/3932/23308/58515/2534/101/3142/1051/939/55423/8772/2064/3600/10288/3280/923/240/11006/84830/975/64115/9092/51176/4092/201633/30009/8631/80149/10859/29126/1803/916/207/1840/8651/399/100133941/9750/7535/56253/2529/100528032/3383/3594/64127/3105/29108/284194/3586/1236/115650/959/8876…	99
BP	GO:0002683	negative regulation of immune system process	127/2907	463/18866	1.49172e-11	8.39974e-09	6.83337e-09	968/11277/2874/135/8370/7353/1652/6397/11025/3134/4831/5094/8993/3579/27202/2213/409/60343/56834/8379/634/22914/554313/3566/11240/383/604/374403/79037/8764/80349/171389/8363/5914/26007/640/1604/3659/11314/654346/3958/3106/25793/3162/933/3142/84166/1051/23495/8772/2064/10288/5654/3280/1378/56833/11006/84830/64115/677/966/4092/201633/30009/4681/7940/3805/5196/80149/10859/29126/10906/1803/207/1840/8…	127
BP	GO:0001906	cell killing	62/2907	172/18866	2.14014e-11	1.10467e-08	8.98673e-09	3134/6813/8993/8807/2213/1667/728358/409/1512/634/22914/51571/572/383/9437/567/11035/820/3004/1604/7264/1668/3106/259197/8772/10578/3002/10666/6283/966/3805/5196/10859/1075/10018/3811/4057/8970/64581/718/56253/1669/11334/100528032/1379/3383/3594/3105/7305/6223/3684/5551/3965/8417/57823/3902/6375/84868/3575/11151/2208/3458	62
BP	GO:0030217	T cell differentiation	81/2907	253/18866	2.39288e-11	1.14011e-08	9.27506e-09	7494/79840/23210/653519/51463/5590/27166/6794/3566/572/55716/26253/604/602/567/5914/11035/3659/3932/10312/101/3142/5971/8809/939/4063/8772/2064/3600/10288/1378/11006/3702/64115/9092/51176/677/4092/925/639/6932/30009/246778/80149/916/57864/1840/8651/64218/399/814/2207/7535/56253/2529/338339/10538/3594/55636/8320/917/1514/3955/1236/914/8876/8784/3965/2625/940/6095/944/3902/51043/3575/915/257101/844…	81
BP	GO:0030098	lymphocyte differentiation	106/2907	368/18866	3.25334e-11	1.43937e-08	1.17096e-08	7494/2874/79840/222487/8993/23210/2213/653519/51463/5590/27166/6794/2323/5336/3566/572/55716/26253/604/602/567/5914/11035/3659/3932/10312/25793/101/3142/7163/5971/8809/939/4063/54106/8772/2064/3600/10288/1378/56833/581/11006/3702/64115/9092/51176/677/4092/925/639/6932/30009/5450/246778/80149/916/57864/1840/8651/64218/399/814/2207/115352/7535/56253/2529/11334/338339/10538/10014/931/9759/3594/55636…	106
BP	GO:2000116	regulation of cysteine-type endopeptidase activity	77/2907	239/18866	5.27024e-11	2.17626e-08	1.77043e-08	56616/27141/135/51079/83874/5447/4318/5698/8837/1032/117584/27113/409/1512/4671/27429/8717/572/637/842/8740/4210/10542/8738/400410/114769/112399/8996/831/10049/3932/6622/10016/2534/939/8772/6280/1410/5329/581/5894/51176/26999/51024/9026/207/10018/834/4057/6195/6423/64581/7422/444/22861/9447/4504/26355/356/6279/29108/9709/25816/91662/2934/3965/58484/2852/8530/5641/64780/5468/55655/7057/358/8743/21…	77
BP	GO:0016236	macroautophagy	92/2907	310/18866	1.14595e-10	4.43624e-08	3.60898e-08	100188893/29082/8517/11337/8897/11267/11152/339122/1201/527/8678/65018/1460/55062/9114/83460/60673/27243/11345/5595/80700/51382/5289/25851/26100/51368/5566/8878/51160/27429/79065/389541/9146/64121/5571/23710/93343/84557/57535/80183/643246/81631/65082/83933/57192/90410/533/10542/55968/155066/9554/9140/79720/10133/285973/401505/23001/2629/10312/529/535/3162/79142/7251/64601/28956/51652/1634/120892/…	92
BP	GO:0050867	positive regulation of cell activation	115/2907	421/18866	1.81186e-10	6.60156e-08	5.3705e-08	7494/3134/825/28639/5590/3537/2323/9402/6810/57126/353514/22914/10459/51571/2039/3566/572/604/8740/8764/5914/10326/1604/56848/283234/8741/3932/23308/11027/58515/2534/101/3142/939/54106/55423/8772/958/3600/10288/3280/923/10666/683/388077/11006/120892/149840/975/64115/9092/51176/28638/30009/10859/29126/1803/916/1075/207/8651/399/100133941/6195/2207/64581/115352/7535/100528032/338339/2268/79155/4317…	115
BP	GO:0002429	immune response-activating cell surface receptor signaling pathway	127/2907	481/18866	2.29637e-10	7.48616e-08	6.09015e-08	8517/5715/2874/6500/5700/27040/5719/5296/2867/28639/5683/3385/27202/54923/5687/5698/2213/8892/2357/2358/10093/5595/5566/3537/6794/28893/9402/79908/2212/5336/634/55072/22914/5338/26253/10092/10603/2214/79037/59338/28921/2209/5699/919/660/640/11314/25865/5359/10458/3958/3932/3384/23308/8398/728/11027/2534/5710/933/5971/259197/9473/10666/1378/581/388077/11006/5894/200958/3702/975/28638/26999/5583/86…	127
BP	GO:0002757	immune response-activating signal transduction	127/2907	481/18866	2.29637e-10	7.48616e-08	6.09015e-08	8517/5715/2874/6500/5700/27040/5719/5296/2867/28639/5683/3385/27202/54923/5687/5698/2213/8892/2357/2358/10093/5595/5566/3537/6794/28893/9402/79908/2212/5336/634/55072/22914/5338/26253/10092/10603/2214/79037/59338/28921/2209/5699/919/660/640/11314/25865/5359/10458/3958/3932/3384/23308/8398/728/11027/2534/5710/933/5971/259197/9473/10666/1378/581/388077/11006/5894/200958/3702/975/28638/26999/5583/86…	127
BP	GO:0045088	regulation of innate immune response	90/2907	307/18866	3.67364e-10	1.13773e-07	9.25564e-08	8517/5715/11277/6500/5700/5719/3134/2867/81030/9782/8807/5683/3385/5687/5698/2213/2358/5566/409/60343/5336/634/22914/383/26253/9437/5699/26007/3659/5359/3106/3384/11027/2534/5710/101/84166/5971/259197/8772/10666/1378/56833/3661/5894/200958/3805/10859/2219/10906/9491/3055/8651/3460/9861/117157/2207/79865/56253/100528032/338339/2268/83666/50856/79132/3665/115362/9447/3105/29108/5721/6223/3965/58484…	90
BP	GO:1905037	autophagosome organization	41/2907	99/18866	4.20612e-10	1.24061e-07	1.00926e-07	29082/11337/8897/11152/339122/8678/65018/55062/83460/60673/11345/5289/26100/79065/23710/84557/57535/643246/81631/90410/55968/9554/9140/285973/2629/10312/79142/120892/10533/9638/81671/8131/64422/137886/8408/26471/23130/51100/9531/57533/5899	41
BP	GO:0031341	regulation of cell killing	39/2907	92/18866	4.89718e-10	1.31148e-07	1.06692e-07	3134/8807/2213/409/634/22914/51571/572/383/9437/567/11035/1604/3106/259197/8772/10666/966/3805/10859/10018/64581/56253/100528032/1379/3383/3594/3105/7305/3684/5551/3965/8417/3902/6375/84868/3575/2208/3458	39
BP	GO:0002699	positive regulation of immune effector process	71/2907	223/18866	5.28776e-10	1.31148e-07	1.06692e-07	7494/3134/2867/6813/8807/5590/9958/6810/57126/22914/10459/51571/3566/383/4049/8764/567/5914/640/56848/11314/8741/3106/3554/3162/3142/259197/8809/54106/8772/958/10666/149840/975/2865/10417/30009/3805/10859/117157/2207/718/56253/100528032/2268/5906/79132/4282/3594/64127/3105/7305/6223/8482/3684/3965/8417/2625/940/3902/6375/5795/5950/5225/3689/388325/7293/2208/3458/3109/7099	71
BP	GO:0045785	positive regulation of cell adhesion	115/2907	428/18866	5.33411e-10	1.31148e-07	1.06692e-07	3611/7494/4814/4739/11078/5590/7168/9402/9270/6810/55679/10211/22914/1785/51571/8728/2039/3566/572/6809/604/8740/8764/201163/5914/2041/285613/10326/1604/283234/25865/8291/7264/3932/23308/58515/2534/7030/101/3142/939/55423/8772/2064/5329/3600/10288/3280/923/240/11006/975/64115/9092/51176/4092/8631/10859/29126/1803/916/207/8651/10562/399/100133941/6423/7535/2529/7052/100528032/7422/3383/3594/64127/…	115
BP	GO:0002237	response to molecule of bacterial origin	100/2907	356/18866	5.39089e-10	1.31148e-07	1.06692e-07	7494/968/57048/133/22933/249/6556/2213/1667/5595/728358/90933/5336/2678/22904/9516/22914/3934/51571/54/383/4049/7056/842/721/567/5914/114769/4793/1604/4795/4791/1668/6622/353376/2919/6590/728/11027/1051/54106/958/6280/10288/11009/923/5467/3661/1634/4016/10417/5196/80149/10859/29126/207/3055/100133941/834/4057/671/5197/9536/1669/100528032/79155/10014/3383/929/4282/64127/7096/356/6279/23641/706/29/…	100
BP	GO:0000045	autophagosome assembly	40/2907	96/18866	5.50508e-10	1.31148e-07	1.06692e-07	29082/11337/8897/11152/339122/8678/65018/55062/83460/60673/11345/5289/26100/79065/23710/84557/57535/643246/81631/90410/55968/9554/9140/285973/10312/79142/120892/10533/9638/81671/8131/64422/137886/8408/26471/23130/51100/9531/57533/5899	40
BP	GO:0034341	response to interferon-gamma	66/2907	202/18866	6.37411e-10	1.46227e-07	1.18958e-07	10437/339122/10379/3134/10581/6813/6556/58191/9482/2634/8519/6810/6672/53840/65010/383/8638/8942/2210/4210/2209/1613/567/55647/3659/10435/3106/6622/10410/84166/55337/958/3661/51466/6351/4641/3055/8651/3460/3107/834/2633/4938/83666/3665/3383/115362/3594/4502/356/3105/2934/3965/6846/6358/6348/9021/5468/6352/4684/6375/6349/3458/3117/7097/7099	66
BP	GO:0002703	regulation of leukocyte mediated immunity	68/2907	211/18866	6.83614e-10	1.51225e-07	1.23025e-07	3134/6813/8807/2213/5590/409/6810/57126/634/22914/10459/51571/3566/383/604/4049/9437/567/11035/640/56848/11314/8741/3106/3554/3162/259197/8809/8772/958/10666/1378/149840/975/4092/30009/3805/10859/117157/2207/718/56253/2529/100528032/2268/3383/3594/64127/3105/29/7305/3586/7133/3684/3965/8417/2625/940/722/3902/6375/84868/3575/3689/388325/2208/7099/1178	68
BP	GO:0046651	lymphocyte proliferation	84/2907	283/18866	7.25473e-10	1.54951e-07	1.26056e-07	6556/2213/2323/8379/55716/383/604/8740/8764/5699/11035/640/1604/2281/283234/3659/11314/64343/654346/3958/23308/58515/2534/933/1051/896/54106/23495/8772/958/2064/3600/10288/3280/923/581/683/975/64115/51176/7940/246778/10859/29126/916/100133941/115352/7535/56253/931/4282/3594/51293/3105/7305/29108/3614/284194/3586/115650/7133/959/3965/10457/973/940/977/930/944/6352/6375/51043/84868/3575/11151/57162…	84
BP	GO:0007033	vacuole organization	59/2907	174/18866	1.02871e-09	2.07702e-07	1.6897e-07	29082/11337/8897/11277/11152/339122/1201/8678/65018/55062/83460/64400/60673/7942/147007/11345/5289/26100/79065/23710/84557/29911/57535/643246/81631/65082/90410/55968/9554/55647/2027/9140/285973/2629/10312/79142/1203/64601/120892/10533/9638/81671/302/84286/2026/4504/8131/64422/137886/8408/26471/23130/51100/9531/3074/57533/11151/5899/2548	59
BP	GO:1903039	positive regulation of leukocyte cell-cell adhesion	73/2907	235/18866	1.03951e-09	2.07702e-07	1.6897e-07	7494/5590/9402/22914/51571/3566/572/604/8740/8764/5914/10326/1604/283234/3932/23308/58515/2534/101/3142/939/55423/8772/3600/10288/3280/923/240/11006/975/64115/9092/51176/8631/10859/29126/1803/916/207/8651/399/100133941/7535/2529/100528032/3383/3594/64127/3105/29108/1236/115650/959/8876/3965/2625/5133/940/5058/6403/921/6352/6375/51043/84868/3575/11151/3689/84433/2113/3458/3109/2319	73
BP	GO:0045862	positive regulation of proteolysis	102/2907	370/18866	1.12321e-09	2.17412e-07	1.76869e-07	56616/27141/51079/5700/83874/3300/1453/55743/65018/825/22933/55851/4155/8837/5595/5118/27113/79016/27166/1512/10273/27429/8717/10318/572/54998/637/842/9798/4210/2931/3303/8738/400410/9810/112399/51548/57333/10162/7123/2629/3932/6622/10016/4287/2534/101/25820/1191/8772/6280/1378/581/120892/2161/64115/26999/4092/1263/51024/9026/80149/1075/207/10018/26577/3304/834/6423/64581/444/22861/9447/26355/356…	102
BP	GO:0032943	mononuclear cell proliferation	84/2907	286/18866	1.27504e-09	2.39322e-07	1.94693e-07	6556/2213/2323/8379/55716/383/604/8740/8764/5699/11035/640/1604/2281/283234/3659/11314/64343/654346/3958/23308/58515/2534/933/1051/896/54106/23495/8772/958/2064/3600/10288/3280/923/581/683/975/64115/51176/7940/246778/10859/29126/916/100133941/115352/7535/56253/931/4282/3594/51293/3105/7305/29108/3614/284194/3586/115650/7133/959/3965/10457/973/940/977/930/944/6352/6375/51043/84868/3575/11151/57162…	84
BP	GO:0002696	positive regulation of leukocyte activation	109/2907	406/18866	1.5808e-09	2.87985e-07	2.34281e-07	7494/3134/28639/5590/3537/2323/9402/6810/57126/22914/10459/51571/3566/572/604/8740/8764/5914/10326/1604/56848/283234/8741/3932/23308/58515/2534/101/3142/939/54106/55423/8772/958/3600/10288/3280/923/10666/683/388077/11006/120892/149840/975/64115/9092/51176/28638/30009/10859/29126/1803/916/1075/207/8651/399/100133941/2207/64581/115352/7535/100528032/338339/2268/79155/4317/4282/3594/64127/51293/3105…	109
BP	GO:0032609	interferon-gamma production	44/2907	115/18866	1.98635e-09	3.48332e-07	2.83375e-07	8993/8807/6556/22914/51571/4049/602/5914/11035/64343/654346/3554/8809/54106/8772/10666/3702/64115/246778/80149/10859/29126/916/64581/56253/100528032/929/3594/3105/29108/8320/284194/3586/1236/914/3965/9636/2625/6375/84868/51311/9173/1649/7099	44
BP	GO:0071706	tumor necrosis factor superfamily cytokine production	45/2907	119/18866	2.02453e-09	3.48332e-07	2.83375e-07	11277/1652/27202/5004/409/54/5914/56848/4795/64343/58515/101/54106/1191/8772/1535/4157/64115/10417/6504/5196/80149/29126/4057/671/2207/50856/929/4282/64127/706/29108/3586/5443/914/3965/10457/6348/5795/84868/23643/23547/3458/7097/7099	45
BP	GO:1903555	regulation of tumor necrosis factor superfamily cytokine production	43/2907	113/18866	3.66948e-09	6.14291e-07	4.99739e-07	11277/1652/27202/5004/409/54/5914/4795/58515/101/54106/1191/8772/1535/4157/64115/10417/6504/5196/80149/29126/4057/671/2207/50856/929/4282/64127/706/29108/3586/5443/914/3965/10457/6348/5795/84868/23643/23547/3458/7097/7099	43
BP	GO:0046631	alpha-beta T cell activation	51/2907	146/18866	4.35031e-09	6.81066e-07	5.54061e-07	135/5590/3566/604/8764/602/5914/1604/3659/11314/654346/10312/3142/5971/8809/4063/3600/3702/975/64115/51176/4092/639/6932/30009/246778/80149/10859/29126/916/8651/64218/7535/56253/2529/10538/50856/3594/3105/8320/284194/1514/3965/2625/940/6095/944/6375/51043/257101/3458	51
BP	GO:0030049	muscle filament sliding	22/2907	39/18866	4.39823e-09	6.81066e-07	5.54061e-07	7168/4635/4637/7136/4607/1674/7111/7134/7139/7138/7140/4633/4703/58/4625/7125/4604/8557/4634/4632/7169/7135	22
BP	GO:0033275	actin-myosin filament sliding	22/2907	39/18866	4.39823e-09	6.81066e-07	5.54061e-07	7168/4635/4637/7136/4607/1674/7111/7134/7139/7138/7140/4633/4703/58/4625/7125/4604/8557/4634/4632/7169/7135	22
BP	GO:0022407	regulation of cell-cell adhesion	114/2907	439/18866	5.36123e-09	8.09402e-07	6.58465e-07	7494/135/2213/4155/5590/9402/3557/10211/8379/634/22914/10459/51571/8728/2039/3566/572/383/604/8740/8764/5914/10326/640/1604/283234/3659/11314/654346/3958/3932/23308/58515/2534/101/3142/1051/5598/939/55423/8772/2064/5329/3600/10288/3280/923/240/11006/84830/975/64115/9092/51176/4092/201633/30009/8631/80149/10859/29126/1803/916/207/1840/8651/399/100133941/9750/18/7535/56253/50488/2529/100528032/7422…	114
BP	GO:0002819	regulation of adaptive immune response	56/2907	168/18866	5.48836e-09	8.09402e-07	6.58465e-07	3134/6556/2213/5590/634/10459/51571/3566/383/604/4049/8764/567/11035/3659/8741/3106/3554/3142/8809/962/8772/958/10666/1378/149840/975/4092/30009/8631/246778/80149/10859/29126/2207/718/2529/3665/3594/3105/29108/3586/115650/7133/8417/2625/940/722/64092/6375/51043/84868/3575/9173/2208/1178	56
BP	GO:0007249	I-kappaB kinase/NF-kappaB signaling	82/2907	286/18866	6.85043e-09	9.86781e-07	8.02766e-07	8517/1936/497661/65018/825/7335/54923/8837/653519/79971/6398/7311/56658/9218/8878/8717/10318/9516/55072/53840/7316/389/5494/602/7329/171389/10542/11035/114769/142678/57153/56848/4795/10133/80216/6284/64343/51246/353376/2534/3162/5971/54106/8772/958/7185/6283/3661/80833/54862/80149/207/147699/399/81858/834/4057/4055/7052/79155/929/64127/356/84270/29108/7088/91662/1236/92610/9755/3965/6275/6095/236…	82
BP	GO:0006909	phagocytosis	102/2907	382/18866	7.191e-09	1.00219e-06	8.15304e-07	11277/135/1201/5296/28639/6556/3385/23210/2213/2358/10093/5595/311/306/3537/28893/2212/5336/1785/5338/720/10092/2214/721/28921/2209/919/5914/10326/55647/55113/8877/11314/10458/8291/353376/8398/2534/55423/3600/1535/10347/388077/28638/81567/26999/8685/10417/55529/6504/2219/4688/4641/3055/5335/84286/399/2207/64581/718/9938/7052/11334/10095/2268/5906/929/4481/56882/29/7305/29108/28526/64422/917/5728/…	102
BP	GO:0071219	cellular response to molecule of bacterial origin	68/2907	222/18866	7.28102e-09	1.00219e-06	8.15304e-07	7494/968/57048/22933/2213/1667/5595/728358/90933/22904/9516/22914/3934/51571/383/5914/114769/4793/1604/4795/1668/353376/2919/11027/1051/958/10288/11009/923/5467/3661/10417/5196/80149/10859/29126/207/3055/834/4057/671/5197/1669/100528032/79155/10014/3383/929/4282/64127/7096/23641/706/29108/3586/7133/8754/59307/6348/6352/84868/5473/23643/388325/7001/1053/7097/7099	68
BP	GO:0032496	response to lipopolysaccharide	92/2907	334/18866	7.60784e-09	1.02441e-06	8.3338e-07	7494/968/57048/133/249/6556/1667/5595/728358/90933/5336/2678/22904/9516/22914/3934/54/383/4049/7056/842/5914/114769/4793/1604/4795/4791/1668/6622/353376/2919/6590/728/11027/1051/958/6280/10288/11009/923/5467/3661/1634/4016/10417/5196/80149/10859/29126/207/3055/834/4057/671/5197/9536/1669/100528032/79155/10014/3383/929/4282/64127/356/6279/23641/706/29/29108/3586/1236/10804/7133/3587/3965/3248/8754…	92
BP	GO:0050870	positive regulation of T cell activation	66/2907	214/18866	8.9086e-09	1.14965e-06	9.35267e-07	7494/5590/9402/22914/51571/3566/572/604/8740/8764/5914/10326/1604/283234/3932/23308/58515/2534/101/3142/939/55423/8772/3600/10288/3280/923/11006/975/64115/9092/51176/10859/29126/1803/916/207/8651/399/100133941/7535/100528032/3594/64127/3105/29108/1236/115650/959/8876/3965/2625/5133/940/5058/921/6352/6375/51043/84868/3575/11151/84433/3458/3109/2319	66
BP	GO:0032649	regulation of interferon-gamma production	40/2907	104/18866	8.90917e-09	1.14965e-06	9.35267e-07	8993/6556/22914/51571/4049/602/5914/11035/654346/3554/8809/54106/8772/10666/64115/246778/80149/10859/29126/916/64581/56253/100528032/929/3594/3105/29108/284194/3586/1236/914/3965/9636/2625/6375/84868/51311/9173/1649/7099	40
BP	GO:0001909	leukocyte mediated cytotoxicity	41/2907	108/18866	9.11226e-09	1.15186e-06	9.37066e-07	3134/6813/8807/2213/409/1512/634/22914/51571/383/9437/567/11035/3004/7264/3106/259197/8772/3002/10666/3805/10859/1075/3811/56253/11334/100528032/3383/3594/3105/7305/3684/5551/3965/8417/57823/3902/6375/84868/3575/11151	41
BP	GO:0002221	pattern recognition receptor signaling pathway	63/2907	201/18866	9.65494e-09	1.19605e-06	9.73015e-07	8517/2874/7353/6397/2867/7335/7311/5289/409/9958/10318/10211/7316/26253/7323/171389/3303/26007/4795/3659/80216/11314/5608/23098/353376/11027/54106/8772/958/6280/1535/3661/2219/57864/3304/4057/115352/79155/79132/3665/929/64127/7096/6279/7100/1514/92610/3684/1508/5641/7321/81793/84868/285852/23643/51311/3689/23547/57162/388325/7314/7097/7099	63
BP	GO:0050670	regulation of lymphocyte proliferation	67/2907	219/18866	9.88442e-09	1.20047e-06	9.76609e-07	2213/2323/8379/383/604/8764/11035/640/1604/283234/3659/11314/654346/3958/23308/58515/933/1051/54106/23495/8772/958/2064/3600/10288/3280/923/683/975/64115/7940/246778/10859/29126/916/100133941/115352/7535/56253/4282/3594/51293/3105/7305/29108/284194/3586/115650/7133/959/3965/10457/940/944/6352/6375/51043/84868/11151/57162/7293/11326/84433/4332/3109/7099/1178	67
BP	GO:0002833	positive regulation of response to biotic stimulus	74/2907	251/18866	1.01095e-08	1.2042e-06	9.79643e-07	8517/5715/6500/5700/5719/3134/2867/81030/9782/8807/5683/3385/5687/5698/2358/5595/5566/9958/5336/22914/383/26253/5699/10133/5359/3384/11027/2534/5710/101/84166/5971/259197/8772/1535/10666/3661/5894/200958/3805/2219/29126/9491/3055/9861/117157/2207/56253/100528032/338339/83666/50856/79132/3665/115362/4282/9447/29108/5721/6223/58484/5058/3902/6352/84868/5225/23643/149628/10462/51311/388325/84433/433…	74
BP	GO:0022409	positive regulation of cell-cell adhesion	80/2907	279/18866	1.0379e-08	1.21297e-06	9.86775e-07	7494/5590/9402/10211/22914/51571/8728/2039/3566/572/604/8740/8764/5914/10326/1604/283234/3932/23308/58515/2534/101/3142/939/55423/8772/5329/3600/10288/3280/923/240/11006/975/64115/9092/51176/4092/8631/10859/29126/1803/916/207/8651/399/100133941/7535/2529/100528032/3383/3594/64127/3105/29108/3586/1236/115650/959/8876/3965/2625/5133/940/5058/6403/921/6352/6375/51043/4680/84868/3575/11151/3689/84433…	80
BP	GO:0070661	leukocyte proliferation	87/2907	313/18866	1.21623e-08	1.39507e-06	1.13492e-06	6556/2213/5595/2323/8379/55716/383/604/8740/8764/5699/11035/640/1604/2281/283234/3659/11314/64343/654346/3958/10312/23308/58515/2534/933/1051/896/54106/23495/1191/8772/958/2064/3600/10288/3280/923/581/683/975/64115/51176/7940/246778/10859/29126/916/100133941/115352/7535/56253/931/4282/3594/51293/3105/7305/29108/3614/284194/3586/115650/7133/959/3965/10457/973/940/977/930/944/6352/6375/51043/84868/…	87
BP	GO:0032944	regulation of mononuclear cell proliferation	67/2907	221/18866	1.47831e-08	1.66485e-06	1.35439e-06	2213/2323/8379/383/604/8764/11035/640/1604/283234/3659/11314/654346/3958/23308/58515/933/1051/54106/23495/8772/958/2064/3600/10288/3280/923/683/975/64115/7940/246778/10859/29126/916/100133941/115352/7535/56253/4282/3594/51293/3105/7305/29108/284194/3586/115650/7133/959/3965/10457/940/944/6352/6375/51043/84868/11151/57162/7293/11326/84433/4332/3109/7099/1178	67
BP	GO:0071222	cellular response to lipopolysaccharide	64/2907	208/18866	1.64412e-08	1.81852e-06	1.4794e-06	7494/968/57048/1667/5595/728358/90933/22904/9516/22914/3934/383/5914/114769/4793/1604/4795/1668/353376/2919/11027/1051/958/10288/11009/923/5467/3661/10417/5196/80149/10859/29126/207/3055/834/4057/671/5197/1669/100528032/79155/10014/3383/929/4282/64127/23641/706/29108/3586/7133/8754/59307/6348/6352/84868/5473/23643/388325/7001/1053/7097/7099	64
BP	GO:0071216	cellular response to biotic stimulus	72/2907	246/18866	2.21835e-08	2.41061e-06	1.96108e-06	7494/968/57048/22933/2213/1667/5595/728358/90933/80198/22904/9516/22914/3934/51571/383/5914/114769/4793/1604/4795/1668/353376/2919/11027/1051/958/10288/11009/923/5467/3661/10417/5196/80149/10859/29126/207/10018/3055/834/4057/671/64581/5197/1669/100528032/79155/10014/3383/929/4282/64127/7096/23641/706/29108/3586/7133/8754/59307/6348/6352/84868/5473/23643/1649/388325/7001/1053/7097/7099	72
BP	GO:0043281	regulation of cysteine-type endopeptidase activity involved in apoptotic process	65/2907	215/18866	2.71728e-08	2.90186e-06	2.36073e-06	56616/135/51079/5447/4318/8837/1032/117584/27113/409/1512/4671/27429/8717/572/637/842/8740/10542/8738/400410/114769/112399/8996/10049/3932/6622/10016/939/8772/6280/1410/5329/581/5894/51176/51024/9026/207/10018/834/6195/6423/64581/7422/22861/4504/26355/356/6279/29108/9709/25816/91662/2934/3965/58484/2852/64780/5468/55655/7057/358/8743/2168	65
BP	GO:0032640	tumor necrosis factor production	42/2907	116/18866	3.02692e-08	3.13486e-06	2.55027e-06	11277/1652/27202/5004/409/54/5914/56848/4795/64343/58515/54106/1191/8772/1535/4157/64115/10417/6504/5196/80149/4057/671/2207/50856/929/4282/64127/706/29108/3586/5443/914/3965/10457/6348/5795/84868/23643/23547/7097/7099	42
BP	GO:1902105	regulation of leukocyte differentiation	81/2907	290/18866	3.03667e-08	3.13486e-06	2.55027e-06	7494/11025/4831/8993/2213/5590/27166/2323/56834/634/3566/572/604/5914/2778/3659/3106/25793/7030/101/3142/1051/939/54106/8772/2064/3600/10288/1378/56833/11006/3059/64115/9092/51176/677/4092/639/6932/30009/246778/5196/80149/10859/57864/1840/8651/399/814/4057/115352/7535/54997/56253/3665/3594/7305/914/55365/8876/8784/6886/3965/2625/940/3902/6348/51043/714/3575/9398/257101/28959/150372/1230/84433/700…	81
BP	GO:0002706	regulation of lymphocyte mediated immunity	51/2907	154/18866	3.30539e-08	3.35632e-06	2.73044e-06	3134/8807/2213/5590/409/634/22914/10459/51571/383/604/4049/9437/567/11035/8741/3106/3554/259197/8809/8772/958/10666/1378/149840/975/4092/30009/3805/10859/117157/2207/718/56253/2529/100528032/3594/3105/3586/7133/3965/8417/2625/940/722/3902/6375/84868/3575/2208/1178	51
BP	GO:0042098	T cell proliferation	60/2907	195/18866	4.55667e-08	4.55226e-06	3.70336e-06	6556/8379/55716/383/8740/8764/5699/11035/1604/2281/283234/3659/654346/3958/23308/58515/2534/1051/896/8772/2064/3600/10288/3280/923/581/975/64115/246778/10859/29126/916/100133941/7535/56253/3594/3105/29108/284194/3586/115650/7133/959/3965/10457/940/977/944/6352/6375/51043/84868/11151/57162/7293/11326/84433/7001/3109/1178	60
BP	GO:0032680	regulation of tumor necrosis factor production	40/2907	110/18866	5.57871e-08	5.48485e-06	4.46204e-06	11277/1652/27202/5004/409/54/5914/4795/58515/54106/1191/8772/1535/4157/64115/10417/6504/5196/80149/4057/671/2207/50856/929/4282/64127/706/29108/3586/5443/914/3965/10457/6348/5795/84868/23643/23547/7097/7099	40
BP	GO:0002700	regulation of production of molecular mediator of immune response	48/2907	144/18866	6.59691e-08	6.38457e-06	5.19398e-06	7494/11277/3134/2867/2213/5590/6810/10459/3566/383/604/8764/567/8741/3554/3162/933/8809/54106/958/10666/149840/975/2865/4092/10417/30009/3805/10859/2207/115352/4282/64127/3105/3586/7133/959/8482/2625/940/6375/5950/5225/388325/7293/336/7099/1178	48
BP	GO:0050727	regulation of inflammatory response	107/2907	425/18866	8.88919e-08	8.47071e-06	6.8911e-06	11277/2874/135/5603/1652/2867/4318/81030/8993/5687/2213/3603/2358/837/7114/4598/8717/2678/10318/22904/353514/7850/284207/54/604/4049/4210/171389/7130/8877/10162/5138/2629/6622/63940/3554/101/388581/1051/5598/54106/838/6280/3848/3600/923/56833/5467/240/6283/3661/683/120892/2161/975/2865/80149/89790/1075/3055/81858/834/2207/64581/718/8692/2529/7052/4317/347/115362/22861/7941/64127/6279/29/29108/500…	107
BP	GO:0052547	regulation of peptidase activity	115/2907	466/18866	9.35991e-08	8.67707e-06	7.05898e-06	56616/27141/135/51079/83874/65018/5447/4318/3700/55851/5698/4155/8837/5595/1032/117584/5118/27113/27166/409/1512/4671/27429/8717/572/720/637/5266/842/8740/5265/721/4210/10542/8738/400410/114769/112399/8996/57333/831/274/10049/51035/3932/6622/27151/6590/10016/2534/1294/939/8772/6280/1410/5329/5973/1378/581/5894/64115/51176/26999/51024/9026/302/9491/207/27344/10018/1476/26577/834/4057/6195/6423/645…	115
BP	GO:0071356	cellular response to tumor necrosis factor	81/2907	297/18866	9.38592e-08	8.67707e-06	7.05898e-06	3611/8517/5715/2874/5700/5719/51763/5683/5687/5698/5595/117584/837/7114/2634/8717/4050/51330/55072/3934/8742/943/4049/8740/8764/5699/3303/114769/8877/1116/8741/2629/5710/84817/939/23495/958/7185/84888/1535/677/6351/80149/9491/207/8115/9861/3304/81858/834/4055/8970/2633/8692/8718/8531/246330/3383/9759/9447/29108/115650/7133/959/5721/55022/8784/2167/6846/2852/2625/83483/6358/6095/944/6348/6352/6375…	81
BP	GO:0071887	leukocyte apoptotic process	39/2907	108/18866	1.01026e-07	9.13765e-06	7.43367e-06	3579/27166/338442/55716/604/842/11035/640/3958/101/171558/939/8772/3661/581/3059/10859/29126/207/57864/10018/2207/3665/4282/64127/356/917/3586/1514/5728/1236/3965/5133/6352/1942/3575/1831/155038/1178	39
BP	GO:0002449	lymphocyte mediated immunity	95/2907	366/18866	1.01792e-07	9.13765e-06	7.43367e-06	11277/3134/8807/28639/6556/2213/5590/409/1512/3537/28893/634/22914/10459/51571/3566/383/720/604/4049/9437/721/28921/602/567/11035/3004/1604/2794/3824/7264/8741/3106/10312/3554/715/259197/8809/939/1191/8772/958/3002/10666/1378/388077/149840/975/28638/4092/925/30009/3805/10859/1075/3811/117157/2207/718/56253/2529/100528032/10538/3665/3383/3594/3105/713/28526/3586/7133/959/5551/3965/8417/2625/57823/…	95
BP	GO:0045089	positive regulation of innate immune response	63/2907	213/18866	1.07968e-07	9.47924e-06	7.71156e-06	8517/5715/6500/5700/5719/3134/2867/81030/9782/8807/5683/3385/5687/5698/2358/5566/5336/22914/26253/5699/5359/3384/11027/2534/5710/101/84166/5971/259197/8772/10666/3661/5894/200958/3805/2219/9491/3055/9861/117157/2207/56253/100528032/338339/83666/50856/3665/115362/9447/29108/5721/6223/58484/5058/3902/6352/84868/149628/10462/51311/84433/4332/7099	63
BP	GO:1903706	regulation of hemopoiesis	121/2907	498/18866	1.08658e-07	9.47924e-06	7.71156e-06	7494/5715/5700/5719/8370/11025/4831/60682/8993/5683/5687/5698/2213/3020/5590/27166/2323/56834/634/554313/3566/572/604/80349/201163/5699/3303/8363/567/5914/3021/10398/2778/3659/3958/3106/25793/7030/5710/101/3142/1051/939/54106/5916/8772/2064/1441/3600/10288/3280/1378/56833/11006/3059/64115/9092/51176/677/4092/639/6932/30009/84661/246778/5196/80149/10859/10826/9491/57864/1840/8651/399/814/9861/3304…	121
BP	GO:0030595	leukocyte chemotaxis	67/2907	232/18866	1.18202e-07	1.01686e-05	8.2724e-06	3577/23604/1652/2867/3579/27202/3603/58191/1667/2358/5595/728358/643/22914/11240/120425/8740/8291/3958/63940/51192/2919/728/4354/101/6280/1441/56833/240/6283/683/80024/4485/4681/6351/5196/1803/9750/2207/1240/5197/100528032/7422/4282/80270/1901/7941/6279/3586/1236/6223/3965/6846/5641/6358/6348/6352/6375/6288/7057/1588/5473/11151/3689/1230/6349/719	67
BP	GO:0071346	cellular response to interferon-gamma	56/2907	182/18866	1.26334e-07	1.07193e-05	8.7204e-06	10437/339122/10379/3134/6813/9482/2634/6810/6672/53840/65010/383/8638/2210/2209/1613/567/55647/3659/10435/3106/84166/3661/51466/6351/4641/3055/8651/3460/3107/834/2633/4938/83666/3665/3383/115362/3594/4502/356/3105/2934/3965/6846/6358/6348/9021/5468/6352/4684/6375/6349/3458/3117/7097/7099	56
BP	GO:0042116	macrophage activation	37/2907	101/18866	1.39379e-07	1.15827e-05	9.42275e-06	11277/10135/6556/23210/2213/2358/22904/3566/8877/8291/6622/728/1191/120892/80149/1075/671/79155/4317/4282/7096/7305/3586/3684/8530/712/6095/6348/84868/7057/51311/3689/9173/11326/3458/7097/7099	37
BP	GO:0050764	regulation of phagocytosis	36/2907	97/18866	1.40249e-07	1.15827e-05	9.42275e-06	6556/2213/2358/1785/720/721/10326/8877/11314/8291/55423/3600/1535/10347/55529/3055/2207/64581/718/2268/5906/29/29108/64422/5728/11031/4240/717/722/5468/5795/3560/3458/7097/4035/336	36
BP	GO:0034612	response to tumor necrosis factor	85/2907	320/18866	1.61708e-07	1.31307e-05	1.06821e-05	3611/8517/5715/2874/5700/5719/51763/5683/5687/5698/58191/5595/117584/837/7114/2634/8717/2678/4050/51330/55072/3934/8742/943/4049/8740/8764/5699/3303/114769/8877/1116/8741/2629/5710/84817/939/23495/958/7185/84888/1535/677/6351/80149/9491/207/8115/9861/3304/81858/834/4055/8970/2633/8692/8718/8531/246330/3383/9759/929/9447/29108/115650/7133/959/5721/55022/8784/2167/6846/2852/2625/83483/6358/8754/609…	85
BP	GO:0050852	T cell receptor signaling pathway	61/2907	206/18866	1.63233e-07	1.31307e-05	1.06821e-05	8517/5715/6500/5700/27040/5719/5296/28639/5683/54923/5687/5698/8892/6794/9402/79908/5336/634/55072/79037/5699/919/11314/25865/3958/3932/23308/2534/5710/9473/10666/11006/3702/975/8631/80149/916/9491/5335/9861/7535/2633/53347/3105/28755/3937/917/1236/5721/28664/28682/2625/940/28589/5058/28653/5795/915/84433/10917/3117	61
BP	GO:0090199	regulation of release of cytochrome c from mitochondria	23/2907	49/18866	1.85491e-07	1.47299e-05	1.19831e-05	57048/27141/65018/4318/27113/27166/409/572/637/56947/8996/8398/1191/5329/581/598/207/10018/51025/26355/29108/2852/8743	23
BP	GO:0097191	extrinsic apoptotic signaling pathway	66/2907	230/18866	1.89941e-07	1.48924e-05	1.21152e-05	56616/11337/51079/8794/162989/8837/117584/51202/27429/51304/6810/85450/8717/51330/6672/3934/8742/572/637/842/2931/3303/1613/8738/8996/2017/4118/3958/2534/3162/5598/939/8772/7185/6788/581/5894/598/3429/5196/207/597/10018/3304/4055/6423/10572/7078/8692/55437/50486/246330/3383/2872/356/29108/5728/7133/9531/2852/7057/2623/8743/7001/6272/3458	66
BP	GO:0002822	regulation of adaptive immune response based on somatic recombination of immune receptors built from immunoglobulin superfamily domains	49/2907	153/18866	1.96491e-07	1.52133e-05	1.23764e-05	3134/6556/2213/5590/634/10459/51571/3566/383/604/4049/567/11035/8741/3106/3554/3142/8809/8772/958/10666/1378/149840/975/4092/30009/246778/80149/10859/29126/2207/718/2529/3594/3105/3586/115650/7133/8417/2625/940/722/6375/51043/84868/3575/9173/2208/1178	49
BP	GO:0070663	regulation of leukocyte proliferation	68/2907	240/18866	2.11317e-07	1.59941e-05	1.30115e-05	2213/5595/2323/8379/383/604/8764/11035/640/1604/283234/3659/11314/654346/3958/23308/58515/933/1051/54106/23495/8772/958/2064/3600/10288/3280/923/683/975/64115/7940/246778/10859/29126/916/100133941/115352/7535/56253/4282/3594/51293/3105/7305/29108/284194/3586/115650/7133/959/3965/10457/940/944/6352/6375/51043/84868/11151/57162/7293/11326/84433/4332/3109/7099/1178	68
BP	GO:0002685	regulation of leukocyte migration	62/2907	212/18866	2.1174e-07	1.59941e-05	1.30115e-05	23604/1652/3579/27202/2358/5595/22914/11240/8740/8764/11035/11314/8291/3958/63940/728/58515/3554/4354/101/3162/8772/56833/683/80024/5025/84830/975/4485/4681/6351/1803/207/399/9750/6793/1240/2529/100528032/7422/3383/347/4282/7941/29/29108/1236/8784/3965/6846/83483/5641/6403/3674/6348/6352/6375/7057/1588/1230/928/719	62
BP	GO:0001836	release of cytochrome c from mitochondria	26/2907	60/18866	2.19871e-07	1.62129e-05	1.31895e-05	57048/27141/6648/65018/4318/27113/27166/409/572/637/56947/8996/92609/8398/1191/5329/581/598/51024/207/10018/51025/26355/29108/2852/8743	26
BP	GO:0032732	positive regulation of interleukin-1 production	26/2907	60/18866	2.19871e-07	1.62129e-05	1.31895e-05	5004/3603/353514/79792/11027/834/64581/22861/9447/64127/7305/29108/91662/3965/58484/5005/6348/55655/6288/84868/149628/51311/4332/3458/3315/7099	26
BP	GO:0001910	regulation of leukocyte mediated cytotoxicity	30/2907	75/18866	2.27514e-07	1.65046e-05	1.34269e-05	3134/8807/2213/409/634/22914/51571/383/9437/567/11035/3106/259197/8772/10666/3805/10859/56253/100528032/3383/3594/3105/7305/3684/3965/8417/3902/6375/84868/3575	30
BP	GO:0051251	positive regulation of lymphocyte activation	92/2907	357/18866	2.29157e-07	1.65046e-05	1.34269e-05	7494/3134/28639/5590/3537/2323/9402/22914/10459/51571/3566/572/604/8740/8764/5914/10326/1604/283234/8741/3932/23308/58515/2534/101/3142/939/54106/55423/8772/958/3600/10288/3280/923/683/388077/11006/149840/975/64115/9092/51176/28638/30009/10859/29126/1803/916/207/8651/399/100133941/64581/115352/7535/100528032/79155/4282/3594/64127/51293/3105/7305/29108/28526/1236/115650/959/8876/3965/2625/5133/940…	92
BP	GO:0051250	negative regulation of lymphocyte activation	49/2907	154/18866	2.45534e-07	1.74809e-05	1.4221e-05	135/3134/8993/2213/8379/634/3566/383/604/374403/8764/640/3659/11314/654346/3958/25793/3142/1051/23495/2064/10288/64115/4092/201633/30009/7940/80149/10859/29126/1840/8651/9750/56253/2268/7305/284194/3586/3965/10457/64092/3902/6375/51043/84868/57162/11326/7001/4332	49
BP	GO:0002698	negative regulation of immune effector process	42/2907	124/18866	2.60287e-07	1.83206e-05	1.49042e-05	7353/6397/3134/5094/8993/2213/409/634/3566/383/604/26007/1604/11314/3958/3106/3162/933/3142/5654/1378/56833/966/4092/30009/3805/80149/10859/115352/79132/3105/29/3586/6223/3965/722/6375/51043/84868/3575/11326/336	42
BP	GO:0009615	response to virus	90/2907	349/18866	2.98994e-07	2.06392e-05	1.67904e-05	1937/8517/11277/3669/7268/10379/7353/8678/6397/10581/81030/4600/5094/5683/81559/1667/728358/200315/9958/8519/3934/53840/60489/8638/602/10542/11035/55324/26007/3659/5359/1668/1072/54512/10410/58515/197259/84166/54106/55337/1191/8772/958/55509/3600/5654/3661/10577/10533/598/10417/30009/3429/5450/6351/246778/80149/10859/81576/3460/2633/8692/4938/2268/83666/79132/3665/4599/9447/3594/10625/439996/2910…	90
BP	GO:0051222	positive regulation of protein transport	91/2907	354/18866	2.99891e-07	2.06392e-05	1.67904e-05	7494/5715/135/1201/65018/5296/4946/79971/11132/5590/27113/322/54828/5566/51160/6717/27429/9270/6810/338442/208/4947/8536/285966/55072/572/26253/65220/637/59286/283/7323/5494/2931/9854/118424/55691/56947/23410/640/23368/9520/8841/50855/8398/2534/3305/101/388581/22885/7251/2064/3002/5467/3661/5208/3059/2181/975/1263/8938/51024/80149/4641/8851/18/8692/9619/56253/2268/929/4282/1020/3586/51100/3684/95…	91
BP	GO:0002456	T cell mediated immunity	37/2907	104/18866	3.28478e-07	2.23582e-05	1.81888e-05	11277/3134/8807/6556/2213/5590/1512/634/51571/383/567/11035/3004/1604/2794/7264/3106/3554/8809/8772/975/4092/925/30009/10859/1075/2529/3383/3594/3105/7133/5551/8417/2625/6375/3575/1178	37
BP	GO:0042590	antigen processing and presentation of exogenous peptide antigen via MHC class I	31/2907	80/18866	3.34293e-07	2.25066e-05	1.83096e-05	8517/10437/5715/5700/5719/3134/653361/5683/5687/5698/2210/2209/5699/567/9554/3693/3106/6890/5710/1535/4688/9491/3107/9861/2207/8773/50856/6891/3105/5721/4689	31
BP	GO:0002460	adaptive immune response based on somatic recombination of immune receptors built from immunoglobulin superfamily domains	94/2907	370/18866	3.42799e-07	2.28311e-05	1.85736e-05	11277/3134/8807/28639/6556/2213/5590/1512/3537/28893/634/10459/51571/3566/383/720/604/4049/721/28921/602/567/11035/3004/1604/2794/4791/7264/8741/3106/10312/3554/715/3142/5971/8809/939/4063/1191/8772/958/10666/1378/388077/149840/975/51176/28638/4092/925/30009/246778/80149/10859/29126/1075/64218/2207/718/2529/10538/3665/3383/3594/3105/713/28526/3586/115650/7133/959/5551/8417/2625/940/712/717/722/93…	94
BP	GO:0010952	positive regulation of peptidase activity	59/2907	201/18866	3.59388e-07	2.36814e-05	1.92653e-05	56616/27141/51079/83874/65018/55851/4155/8837/5595/5118/27113/27166/1512/27429/8717/572/637/842/4210/8738/400410/112399/57333/3932/6622/10016/2534/8772/6280/1378/581/64115/26999/51024/9026/10018/26577/834/6423/64581/444/22861/9447/26355/356/6279/29108/91662/5721/2934/3965/58484/2852/5641/2335/5468/55655/1942/8743	59
BP	GO:2001235	positive regulation of apoptotic signaling pathway	55/2907	183/18866	3.82915e-07	2.49661e-05	2.03104e-05	27141/135/8678/65018/4318/162989/27113/56658/1512/27429/51330/8742/572/637/201163/2931/5414/1613/8738/11035/56947/23368/4118/3932/8398/79156/8772/3002/6280/5329/6788/581/400916/598/51024/9026/5883/1075/10018/4055/7078/8692/50486/26355/6279/29108/5728/26471/2934/3965/2852/7057/1649/8743/7314	55
BP	GO:0072593	reactive oxygen species metabolic process	77/2907	288/18866	4.59692e-07	2.96597e-05	2.41288e-05	3039/51079/6648/3040/65018/2644/5447/22933/653361/3043/3240/2358/8837/84334/440503/5547/3049/4835/654816/57126/22914/1785/54/3042/654817/11035/23410/2878/56848/9263/3048/6622/2534/1191/1410/1535/240/683/5025/120892/80149/4688/207/51167/64581/11334/100528032/4317/3383/9759/83667/4504/9973/1647/706/7305/54541/3586/2539/573971/23564/3050/55022/3684/3047/6095/4689/7057/1545/3689/5166/10394/7001/3045/…	77
BP	GO:0006605	protein targeting	108/2907	444/18866	4.8933e-07	3.12465e-05	2.54196e-05	29082/11337/6029/30/5372/51079/27342/51763/374666/65018/9570/84243/200312/9789/6746/653361/10245/28972/728489/130617/7311/130916/6235/27429/51304/9270/117177/208/6728/9146/4666/285966/10005/55072/55825/10901/7316/2039/637/59286/9409/7323/2931/118424/80273/56947/6158/2664/3155/2053/79720/92609/5373/9520/10755/401505/90522/6203/25793/2534/3305/22885/1191/2064/6157/131540/120892/6137/6142/23600/3753…	108
BP	GO:0052548	regulation of endopeptidase activity	106/2907	434/18866	5.05145e-07	3.17323e-05	2.58149e-05	56616/27141/135/51079/83874/5447/4318/3700/55851/5698/4155/8837/1032/117584/27113/27166/409/1512/4671/27429/8717/572/720/637/5266/842/8740/5265/721/4210/10542/8738/400410/114769/112399/8996/831/274/10049/3932/6622/27151/6590/10016/2534/1294/939/8772/6280/1410/5329/5973/1378/581/5894/64115/51176/26999/51024/9026/302/9491/207/27344/10018/1476/834/4057/6195/6423/64581/718/7078/7422/444/22861/9447/45…	106
BP	GO:0032695	negative regulation of interleukin-12 production	12/2907	17/18866	5.07184e-07	3.17323e-05	2.58149e-05	409/353514/54/4210/201633/6504/10859/1240/3586/1236/7057/51311	12
BP	GO:0032655	regulation of interleukin-12 production	24/2907	55/18866	5.46558e-07	3.38538e-05	2.75408e-05	3603/409/4050/353514/54/4210/3106/54106/958/201633/6504/10859/64581/1240/3586/1236/959/3965/7057/51311/388325/3458/7097/7099	24
BP	GO:0050729	positive regulation of inflammatory response	49/2907	158/18866	5.81318e-07	3.56503e-05	2.90023e-05	5603/1652/2867/81030/3603/8717/10318/353514/4049/5138/6622/63940/101/1051/54106/6280/3600/923/6283/120892/2161/975/2865/1075/2207/64581/718/8692/7052/4317/115362/7941/64127/6279/5008/91662/1236/26471/6223/2167/940/81793/6348/5320/9173/2113/3458/7097/7099	49
BP	GO:0001558	regulation of cell growth	103/2907	420/18866	5.94586e-07	3.61065e-05	2.93734e-05	3611/112398/51079/728642/51009/3300/81565/28988/58191/3020/1032/29946/322/5300/3621/6794/51330/634/1785/10459/114804/29948/604/23011/11054/9798/201163/2931/10509/3303/400410/3021/56994/2664/2017/23327/56848/9175/8877/984/10201/978/84717/10507/3475/54512/7869/780/57699/23136/7251/2064/6280/1410/9150/1535/28956/5467/1382/203245/2137/6446/51176/323/4092/51094/6386/10668/207/64218/3304/6195/6423/8851…	103
BP	GO:0045619	regulation of lymphocyte differentiation	54/2907	181/18866	6.29861e-07	3.77626e-05	3.07206e-05	7494/8993/5590/27166/2323/3566/572/604/5914/3659/25793/101/3142/939/54106/2064/3600/10288/1378/56833/11006/64115/9092/51176/677/4092/639/6932/30009/246778/80149/57864/1840/8651/399/814/115352/7535/56253/3594/914/8876/8784/3965/2625/940/3902/51043/3575/257101/150372/84433/7001/3458	54
BP	GO:1903533	regulation of protein targeting	31/2907	82/18866	6.34051e-07	3.77626e-05	3.07206e-05	51763/65018/27429/9270/208/285966/55072/2039/59286/7323/2931/118424/56947/2664/9520/2534/3305/22885/2064/120892/3753/51024/4641/8851/6720/1020/51100/3684/9531/5058/3689	31
BP	GO:0050851	antigen receptor-mediated signaling pathway	84/2907	325/18866	6.63629e-07	3.91478e-05	3.18476e-05	8517/5715/2874/6500/5700/27040/5719/5296/28639/5683/54923/5687/5698/2213/8892/3537/6794/9402/79908/5336/634/55072/10603/79037/59338/5699/919/660/640/11314/25865/3958/3932/23308/2534/5710/933/9473/10666/581/388077/11006/3702/975/28638/5583/8631/80149/916/9491/5335/9861/115352/7535/2633/931/53347/3105/28755/3937/28526/917/1236/5721/28664/28682/2625/973/940/28589/5058/28653/930/974/5795/915/150372/2…	84
BP	GO:0043122	regulation of I-kappaB kinase/NF-kappaB signaling	69/2907	252/18866	6.97299e-07	4.07459e-05	3.31477e-05	8517/1936/497661/65018/825/7335/54923/8837/653519/79971/6398/56658/9218/8878/8717/10318/9516/55072/53840/389/5494/7329/171389/10542/114769/142678/57153/56848/10133/80216/6284/51246/353376/2534/3162/54106/8772/958/7185/6283/3661/80833/54862/80149/207/147699/399/81858/834/4057/4055/7052/79155/64127/356/84270/29108/7088/91662/1236/92610/3965/6275/6095/57162/8743/84433/3315/7099	69
BP	GO:0051092	positive regulation of NF-kappaB transcription factor activity	49/2907	159/18866	7.15974e-07	4.14462e-05	3.37173e-05	8517/825/7335/8807/28232/5687/8837/5590/7311/8717/10211/55072/53840/7316/10542/3303/11035/114769/9175/8877/25865/4791/101/8809/54106/1191/64320/958/7185/6280/6283/5583/3304/4057/3383/9447/64127/6279/29108/959/3965/58484/3689/3556/84433/7314/2319/7097/7099	49
BP	GO:0033209	tumor necrosis factor-mediated signaling pathway	52/2907	173/18866	7.83309e-07	4.49242e-05	3.65468e-05	3611/8517/5715/2874/5700/5719/5683/5687/5698/117584/837/7114/8717/4050/51330/55072/8742/943/4049/8740/8764/5699/3303/114769/8877/8741/5710/84817/939/23495/958/7185/84888/9491/9861/3304/81858/834/4055/8970/8718/246330/9447/29108/115650/7133/959/5721/8784/83483/944/7293	52
BP	GO:0006000	fructose metabolic process	11/2907	15/18866	8.5203e-07	4.7977e-05	3.90303e-05	5210/226/132158/230/5209/26007/5208/231/2203/216/229	11
BP	GO:0015671	oxygen transport	11/2907	15/18866	8.5203e-07	4.7977e-05	3.90303e-05	3039/3040/3043/3049/3042/3048/26034/4151/3050/3047/3045	11
BP	GO:0002718	regulation of cytokine production involved in immune response	31/2907	83/18866	8.63664e-07	4.8194e-05	3.92068e-05	3134/2867/5590/383/604/8764/567/3554/3162/8809/10666/975/2865/4092/10417/30009/3805/10859/2207/4282/64127/3105/3586/7133/8482/2625/6375/388325/336/7099/1178	31
BP	GO:0070231	T cell apoptotic process	22/2907	49/18866	8.9007e-07	4.9224e-05	4.00448e-05	27166/55716/11035/3958/101/171558/939/8772/581/29126/207/57864/10018/356/3965/5133/6352/1942/3575/1831/155038/1178	22
BP	GO:0002705	positive regulation of leukocyte mediated immunity	44/2907	138/18866	9.26665e-07	5.07943e-05	4.13222e-05	3134/8807/5590/6810/57126/22914/10459/51571/3566/383/4049/567/56848/8741/3106/3554/259197/8809/8772/958/10666/149840/975/30009/3805/117157/2207/718/56253/100528032/2268/3594/64127/3105/7305/3684/8417/2625/940/3902/6375/3689/388325/2208	44
BP	GO:0006898	receptor-mediated endocytosis	84/2907	328/18866	9.97573e-07	5.42015e-05	4.4094e-05	3039/3577/133/1201/3040/9094/4600/60682/3579/28988/9260/3043/2213/3240/58191/2358/432/4043/2580/409/3537/28893/5336/10211/634/1785/55716/23011/2210/28921/2209/567/201176/2017/54550/6622/967/2966/3482/1212/23149/1191/6453/160/388077/8650/6642/975/8685/9026/6386/10859/302/1175/2207/718/7422/10188/8906/929/4599/2350/55589/4481/9332/84058/1514/11031/3684/26119/20/28919/43/3690/6288/213/3689/341/928/3…	84
BP	GO:0002367	cytokine production involved in immune response	36/2907	104/18866	1.00838e-06	5.4312e-05	4.4184e-05	3134/2867/8807/6556/5590/383/604/8764/567/1604/56848/3554/3162/8809/10666/975/2865/4092/10417/30009/3805/10859/2207/4282/64127/3105/3586/7133/8482/2625/6375/388325/7097/336/7099/1178	36
BP	GO:0002702	positive regulation of production of molecular mediator of immune response	35/2907	100/18866	1.05474e-06	5.59586e-05	4.55235e-05	7494/3134/2867/5590/6810/10459/3566/8764/567/8741/3554/8809/54106/958/10666/149840/975/2865/10417/30009/3805/10859/2207/4282/64127/3105/8482/2625/940/6375/5950/5225/388325/7293/7099	35
BP	GO:0032731	positive regulation of interleukin-1 beta production	23/2907	53/18866	1.05702e-06	5.59586e-05	4.55235e-05	5004/353514/79792/11027/834/64581/22861/9447/64127/7305/29108/91662/3965/58484/5005/6348/55655/149628/51311/4332/3458/3315/7099	23
BP	GO:0002224	toll-like receptor signaling pathway	47/2907	152/18866	1.07573e-06	5.64669e-05	4.5937e-05	8517/2874/7311/5289/409/10318/10211/7316/7323/171389/4795/3659/11314/23098/353376/11027/54106/8772/958/6280/1535/3661/4057/115352/79155/3665/929/7096/6279/7100/1514/3684/1508/5641/7321/81793/84868/285852/23643/51311/3689/23547/57162/388325/7314/7097/7099	47
BP	GO:0002695	negative regulation of leukocyte activation	54/2907	184/18866	1.11175e-06	5.7867e-05	4.7076e-05	135/3134/8993/2213/8379/634/3566/383/604/374403/8764/640/3659/11314/654346/3958/25793/3162/3142/1051/23495/2064/10288/64115/4092/201633/30009/7940/80149/10859/29126/1840/8651/9750/671/56253/2268/29/7305/284194/3586/3965/10457/2852/8530/64092/3902/6375/51043/84868/57162/11326/7001/4332	54
BP	GO:0032615	interleukin-12 production	24/2907	57/18866	1.20615e-06	6.22573e-05	5.06476e-05	3603/409/4050/353514/54/4210/3106/54106/958/201633/6504/10859/64581/1240/3586/1236/959/3965/7057/51311/388325/3458/7097/7099	24
BP	GO:1904951	positive regulation of establishment of protein localization	92/2907	370/18866	1.24599e-06	6.37823e-05	5.18882e-05	7494/5715/135/1201/65018/5296/4946/79971/11132/5590/27113/322/54828/5566/51160/6717/27429/9270/6810/338442/208/4947/8536/285966/55072/572/26253/65220/637/59286/283/7323/5494/2931/9854/118424/55691/56947/23410/640/23368/9520/8841/50855/8398/2534/3305/101/388581/22885/7251/2064/3002/5467/3661/5208/3059/2181/975/1263/8938/51024/80149/4641/8851/18/8692/9619/56253/2268/929/4282/1020/3586/51100/3684/95…	92
BP	GO:1990266	neutrophil migration	40/2907	122/18866	1.28785e-06	6.5385e-05	5.31921e-05	3577/23604/3579/27202/57126/120425/8291/3958/51192/2919/728/3554/4354/101/6280/1441/56833/6283/683/6351/5196/1803/399/9750/2207/5197/2529/6279/1236/6846/255231/6358/6348/6352/6375/6288/5473/3689/6349/719	40
BP	GO:0031343	positive regulation of cell killing	25/2907	61/18866	1.33244e-06	6.70986e-05	5.45861e-05	3134/8807/22914/51571/572/383/567/3106/259197/8772/10666/10018/64581/56253/100528032/3594/3105/7305/3684/5551/8417/3902/6375/2208/3458	25
BP	GO:0046634	regulation of alpha-beta T cell activation	34/2907	97/18866	1.43927e-06	7.18936e-05	5.84869e-05	135/5590/3566/604/8764/5914/1604/3659/11314/654346/3142/975/64115/4092/639/30009/246778/80149/10859/29126/916/8651/7535/56253/3594/3105/284194/3965/2625/940/6375/51043/257101/3458	34
BP	GO:0071496	cellular response to external stimulus	83/2907	326/18866	1.48808e-06	7.32102e-05	5.9558e-05	7494/968/11337/8897/8428/11152/8678/55062/7378/7942/10135/11345/5595/432/5289/26100/7392/64121/5571/23710/3934/572/84557/943/8740/57535/55630/22927/643246/79792/81631/201163/8738/81788/23378/3659/5138/2629/3162/838/8772/958/6715/3600/1535/120892/10533/875/5164/80149/207/9750/834/4055/6423/3383/9759/2350/3759/83667/6720/1647/8131/7100/10634/166/1265/8408/7421/6513/51100/9531/1824/5468/358/213/2752…	83
BP	GO:2000117	negative regulation of cysteine-type endopeptidase activity	33/2907	93/18866	1.49385e-06	7.32102e-05	5.9558e-05	135/5447/4318/8837/1032/117584/409/4671/8740/10542/114769/8996/831/10049/6622/939/1410/5329/5894/51176/207/4057/6195/6423/7422/4504/9709/25816/8530/64780/7057/358/2168	33
BP	GO:0010950	positive regulation of endopeptidase activity	53/2907	181/18866	1.50108e-06	7.32102e-05	5.9558e-05	56616/27141/51079/83874/55851/4155/8837/27113/27166/1512/27429/8717/572/637/842/4210/8738/400410/112399/3932/6622/10016/2534/8772/6280/1378/581/64115/26999/51024/9026/10018/834/6423/64581/444/22861/9447/26355/356/6279/29108/91662/5721/2934/3965/58484/2852/5641/5468/55655/1942/8743	53
BP	GO:0008625	extrinsic apoptotic signaling pathway via death domain receptors	32/2907	89/18866	1.53811e-06	7.44302e-05	6.05505e-05	56616/11337/8794/162989/8837/117584/51202/51304/6810/85450/8717/6672/572/637/8738/4118/3958/3162/8772/6788/581/5894/598/6423/7078/3383/356/5728/9531/7057/8743/6272	32
BP	GO:0070227	lymphocyte apoptotic process	28/2907	73/18866	1.55644e-06	7.47333e-05	6.07971e-05	27166/55716/604/11035/640/3958/101/171558/939/8772/581/29126/207/57864/10018/4282/356/917/3586/5728/3965/5133/6352/1942/3575/1831/155038/1178	28
BP	GO:0032757	positive regulation of interleukin-8 production	23/2907	54/18866	1.57373e-06	7.49823e-05	6.09997e-05	2867/10542/3303/25865/54106/8772/2219/3304/64581/8692/929/64127/7096/29108/7100/914/3965/51311/1649/10394/7097/336/7099	23
BP	GO:0010821	regulation of mitochondrion organization	55/2907	191/18866	1.70845e-06	8.07798e-05	6.57161e-05	57048/27141/65018/51547/4318/27113/27166/8878/409/27429/55072/51571/572/637/59286/7323/201163/2931/3303/118424/56947/8996/2017/23368/10133/9520/5138/2629/8398/25793/3305/22885/1191/3002/5329/89941/1634/581/120892/400916/598/51024/9026/207/10018/51025/6720/26355/706/29108/55022/51100/9531/2852/8743	55
BP	GO:0045580	regulation of T cell differentiation	46/2907	150/18866	1.79879e-06	8.44068e-05	6.86667e-05	7494/5590/27166/3566/572/604/5914/3659/101/3142/939/2064/3600/10288/1378/11006/64115/9092/51176/4092/639/6932/30009/246778/80149/57864/1840/8651/399/814/7535/56253/3594/914/8876/8784/3965/2625/940/3902/51043/3575/257101/84433/7001/3458	46
BP	GO:0002526	acute inflammatory response	37/2907	111/18866	2.03406e-06	9.47289e-05	7.70639e-05	2867/3700/3579/5004/2213/3240/5547/54210/5265/5359/4968/23780/101/1051/2157/923/2161/2865/2207/718/9536/2529/3383/6279/9332/5008/1236/26471/8876/2625/5005/59307/2335/5468/6288/6289/336	37
BP	GO:0045730	respiratory burst	18/2907	37/18866	2.08398e-06	9.60945e-05	7.81749e-05	653361/6556/5223/654816/79415/654817/1604/58515/1535/56833/4688/3055/100133941/64581/6223/4689/7001/1043	18
BP	GO:2000106	regulation of leukocyte apoptotic process	31/2907	86/18866	2.09441e-06	9.60945e-05	7.81749e-05	3579/27166/338442/604/11035/640/3958/101/171558/939/8772/581/3059/10859/29126/57864/2207/3665/4282/64127/917/3586/5728/1236/3965/5133/6352/1942/3575/1831/155038	31
BP	GO:0009636	response to toxic substance	67/2907	250/18866	2.27989e-06	0.000103835	8.44723e-05	3039/6648/3040/65018/6415/3043/140809/5002/4259/3240/4155/5595/7311/10587/3049/27429/3934/140803/383/3042/2954/4501/4357/23410/2053/2878/6324/241/4494/3048/84817/4056/2946/8303/64757/6715/6280/26034/581/51024/6351/125336/89872/51714/83667/4504/1066/4502/9973/26471/573971/2947/3050/4493/3047/6348/6352/213/1545/1471/4495/7001/2168/3045/7097/348/2944	67
BP	GO:0002576	platelet degranulation	41/2907	129/18866	2.35205e-06	0.000106258	8.64435e-05	7277/6813/3700/5004/1/7114/51368/51706/226/51571/2039/2153/5265/22927/640/801/7123/967/259215/2157/1191/87/5196/2207/7078/10490/7422/5768/308/5005/6403/3674/2335/3690/7057/213/5473/7076/928/6678/350	41
BP	GO:0050866	negative regulation of cell activation	58/2907	207/18866	2.3674e-06	0.000106258	8.64435e-05	135/3134/8993/2213/8379/634/3566/383/604/374403/7056/8764/640/3659/11314/654346/3958/25793/3162/3142/1051/23495/2064/10288/64115/4092/201633/30009/7940/80149/10859/29126/1840/8651/9750/671/18/56253/2268/29/7305/284194/3586/3965/10457/2852/8530/64092/3902/6375/51043/84868/57162/928/11326/7001/4332/348	58
BP	GO:0098754	detoxification	43/2907	138/18866	2.42429e-06	0.000108029	8.78841e-05	3039/6648/3040/6415/3043/140809/5002/4259/3240/10587/3049/3042/2954/4501/23410/2878/241/4494/3048/84817/4056/2946/64757/6280/26034/125336/51714/83667/4504/4502/9973/573971/2947/3050/4493/3047/213/4495/7001/2168/3045/348/2944	43
BP	GO:2001233	regulation of apoptotic signaling pathway	99/2907	413/18866	2.88307e-06	0.000126192	0.00010266	7494/57048/27141/135/51079/23604/6648/8678/65018/4318/162989/8837/1032/117584/27113/27166/56658/409/1512/27429/6810/85450/8717/51330/6672/8742/572/637/201163/2931/5414/3303/1613/8738/11035/56947/8996/2017/23368/4118/3958/3932/8398/2534/3162/2907/5598/79156/1191/8772/7185/3002/6280/5329/6788/581/5894/120892/400916/598/51024/9026/5883/5196/1075/207/10018/3304/4055/6423/7078/8692/4335/55437/50486/51…	99
BP	GO:0046034	ATP metabolic process	79/2907	311/18866	2.89539e-06	0.000126192	0.00010266	11277/126328/4704/4701/6391/51079/374291/65018/4714/4696/4729/2987/5223/203/10476/54949/23479/7114/6901/5210/518/226/5571/4708/572/4728/65220/230/1327/637/5213/9605/2584/201163/3303/5209/2027/4718/56848/51548/1337/539/6389/9551/4204/6622/10975/65990/84300/3101/5208/6834/400916/4707/4695/9167/3304/8021/516/514/669/521/513/9759/2026/526/706/5236/54541/26471/55022/11182/5224/4625/2203/6521/1339/229/…	79
BP	GO:0060326	cell chemotaxis	79/2907	311/18866	2.89539e-06	0.000126192	0.00010266	3577/23604/1652/2867/3579/27202/3603/58191/1667/2358/5595/728358/7114/409/643/22914/11240/120425/8740/25865/2047/8291/3958/63940/51192/2919/728/4354/101/9034/6280/1441/56833/240/1232/6283/9732/683/80024/5025/51176/4485/4681/6351/5196/1803/9750/2207/1240/5197/100528032/7422/10663/4282/80270/1901/7941/6279/3586/1236/6223/3965/6846/5641/6358/6348/6352/6375/6288/7057/1588/5473/11151/3689/1230/6349/71…	79
BP	GO:0002479	antigen processing and presentation of exogenous peptide antigen via MHC class I, TAP-dependent	28/2907	75/18866	2.91337e-06	0.000126192	0.00010266	8517/5715/5700/5719/3134/653361/5683/5687/5698/2210/2209/5699/567/9554/3693/3106/6890/5710/1535/4688/9491/3107/9861/8773/6891/3105/5721/4689	28
BP	GO:0072676	lymphocyte migration	38/2907	117/18866	3.03674e-06	0.000129766	0.000105567	58191/1667/728358/22914/11240/8740/8764/11035/51192/58515/101/8772/80024/84830/30009/6351/207/9750/6793/7535/56253/2529/100528032/3383/347/80270/1901/29108/1236/6846/2625/6358/6348/6352/6375/3695/6288/6349	38
BP	GO:0006936	muscle contraction	89/2907	362/18866	3.03778e-06	0.000129766	0.000105567	51130/6901/5566/7168/6717/226/5606/1760/4635/5829/29098/1613/10398/4637/2017/23327/6324/801/2281/8877/274/5608/6535/3693/7136/8291/1264/8398/4607/2946/10627/1410/79041/4636/9732/5025/72/1145/4092/3753/6546/1674/80149/7111/18/126306/60675/9172/9759/4638/7134/444/3759/7139/5348/7138/4151/113246/5997/7140/4633/3784/2258/59/4703/3778/55959/2852/10174/9826/1824/58/5224/102723475/3281/126393/4625/7125/…	89
BP	GO:0090150	establishment of protein localization to membrane	85/2907	342/18866	3.17748e-06	0.000134348	0.000109295	29082/51608/6029/51079/1201/27342/51763/10139/84243/6746/653361/27113/130617/7311/6235/51304/9270/117177/208/116841/6728/4666/285966/90196/582/2039/572/6809/637/9409/56947/26088/6158/2664/79720/23368/10133/4118/90522/6203/353116/2534/2064/3002/64689/6157/27065/581/131540/6137/2181/6142/3753/51024/6386/23480/6168/4641/10018/9045/100133941/8851/8766/4864/6139/1020/6134/6234/6209/64422/6141/6223/110…	85
BP	GO:0090200	positive regulation of release of cytochrome c from mitochondria	15/2907	28/18866	3.18842e-06	0.000134348	0.000109295	27141/65018/4318/27113/572/637/56947/8398/5329/581/10018/26355/29108/2852/8743	15
BP	GO:0070228	regulation of lymphocyte apoptotic process	23/2907	56/18866	3.35384e-06	0.000140363	0.000114188	27166/604/11035/640/3958/101/171558/939/8772/581/29126/57864/4282/917/3586/5728/3965/5133/6352/1942/3575/1831/155038	23
BP	GO:0042129	regulation of T cell proliferation	49/2907	167/18866	3.44436e-06	0.000143184	0.000116483	8379/383/8764/11035/1604/283234/3659/654346/3958/23308/58515/1051/8772/2064/3600/10288/3280/923/975/64115/246778/10859/29126/916/100133941/7535/56253/3594/3105/29108/284194/3586/115650/7133/959/3965/10457/940/944/6352/6375/51043/84868/11151/57162/11326/84433/3109/1178	49
BP	GO:0050868	negative regulation of T cell activation	38/2907	118/18866	3.82032e-06	0.000157754	0.000128336	135/2213/8379/634/3566/383/604/8764/3659/11314/654346/3958/3142/1051/2064/10288/64115/4092/201633/30009/80149/10859/29126/1840/8651/9750/56253/284194/3586/3965/10457/3902/6375/51043/84868/57162/11326/7001	38
BP	GO:0050766	positive regulation of phagocytosis	26/2907	68/18866	3.9001e-06	0.000159982	0.000130148	6556/2213/2358/1785/720/721/10326/55423/3600/1535/10347/2207/64581/718/5906/29/29108/11031/4240/717/5468/5795/3560/3458/4035/336	26
BP	GO:0035710	CD4-positive, alpha-beta T cell activation	33/2907	97/18866	4.3193e-06	0.000176012	0.000143189	5590/3566/604/602/5914/1604/654346/10312/3142/5971/8809/4063/975/64115/51176/4092/30009/246778/80149/29126/8651/64218/2529/10538/3594/284194/1514/3965/2625/6095/6375/51043/3458	33
BP	GO:0043087	regulation of GTPase activity	111/2907	481/18866	4.98757e-06	0.000200978	0.0001635	2874/83874/10156/81565/30851/60682/51256/9744/4739/11033/8498/126432/54828/5300/64333/409/100271927/9270/208/23092/83478/22914/23329/10144/119016/414059/5998/6904/23348/604/374403/9605/26037/201163/55843/116988/64411/729540/2041/201176/116985/2664/84173/57568/26230/57139/81846/10435/10507/89846/8787/23380/10636/6993/958/2064/9628/9732/9610/3993/120892/79735/23216/10681/9138/2873/55738/6351/3267/2…	111
BP	GO:0043154	negative regulation of cysteine-type endopeptidase activity involved in apoptotic process	30/2907	85/18866	4.99686e-06	0.000200978	0.0001635	135/5447/4318/8837/1032/117584/409/4671/8740/10542/114769/8996/10049/6622/939/1410/5329/5894/51176/207/6195/6423/7422/4504/9709/25816/64780/7057/358/2168	30
BP	GO:0051090	regulation of DNA-binding transcription factor activity	106/2907	455/18866	5.18894e-06	0.000207357	0.000168689	8517/65018/825/7335/222487/8807/28232/5687/8837/5595/5590/90933/7114/7311/306/409/6717/25855/8717/10211/6672/55072/5526/53840/10459/7316/11060/3399/10542/3303/11035/114769/8896/307/4793/9175/4795/3275/8877/25865/4791/101/3162/150684/84166/8809/54106/1191/64320/958/7185/10987/6280/4294/3280/6788/6283/3059/7480/6446/4092/5583/80149/207/3055/3304/4057/1240/7422/10014/3383/9759/9447/64127/57413/6279/…	106
BP	GO:2001056	positive regulation of cysteine-type endopeptidase activity	45/2907	151/18866	5.40887e-06	0.00021476	0.000174712	56616/27141/51079/83874/8837/27113/1512/27429/8717/572/637/842/4210/8738/400410/112399/3932/6622/10016/2534/8772/6280/581/26999/51024/9026/10018/834/64581/444/22861/9447/26355/356/6279/29108/91662/2934/3965/58484/2852/5641/5468/55655/8743	45
BP	GO:0042832	defense response to protozoan	14/2907	26/18866	6.30984e-06	0.000248937	0.000202516	6556/1667/728358/2634/3566/383/602/283234/958/5196/64581/10538/116071/3586	14
BP	GO:0015669	gas transport	12/2907	20/18866	6.54662e-06	0.000256644	0.000208785	3039/3040/3043/3049/3042/3048/26034/4151/3050/3047/358/3045	12
BP	GO:0098869	cellular oxidant detoxification	34/2907	103/18866	6.62444e-06	0.000257127	0.000209178	3039/6648/3040/6415/3043/140809/4259/3240/10587/3049/3042/2954/23410/2878/241/3048/84817/4056/2946/6280/26034/125336/51714/83667/4504/9973/573971/3050/3047/213/7001/2168/3045/348	34
BP	GO:0009595	detection of biotic stimulus	17/2907	36/18866	6.68347e-06	0.000257127	0.000209178	11277/8993/4671/721/3106/64581/56253/64127/7096/706/3105/58484/5058/5795/23643/7097/7099	17
BP	GO:0090313	regulation of protein targeting to membrane	17/2907	36/18866	6.68347e-06	0.000257127	0.000209178	51763/9270/208/285966/2039/56947/2664/2534/2064/3753/51024/4641/8851/1020/3684/5058/3689	17
BP	GO:0031294	lymphocyte costimulation	23/2907	58/18866	6.80996e-06	0.000260376	0.000211821	9402/22914/8740/8764/3932/23308/2534/975/29126/1803/916/207/100133941/100528032/51293/1236/115650/959/5133/940/5058/921/84433	23
BP	GO:0044088	regulation of vacuole organization	20/2907	47/18866	7.61648e-06	0.000289426	0.000235454	29082/8897/11277/65018/57535/90410/9554/2027/79142/64601/120892/9638/302/2026/8131/8408/26471/51100/57533/5899	20
BP	GO:0060333	interferon-gamma-mediated signaling pathway	31/2907	91/18866	8.08269e-06	0.00030527	0.000248343	10437/10379/3134/2634/6672/53840/383/8638/2210/2209/567/3659/3106/84166/3661/3055/8651/3460/3107/2633/4938/83666/3665/3383/4502/3105/9021/5468/4684/3458/3117	31
BP	GO:0006612	protein targeting to membrane	57/2907	210/18866	8.322e-06	0.000312403	0.000254146	29082/6029/27342/51763/84243/6746/653361/130617/7311/6235/51304/9270/117177/208/6728/4666/285966/2039/9409/56947/6158/2664/79720/90522/6203/2534/2064/6157/131540/6137/6142/3753/51024/6386/23480/6168/4641/9045/8851/6139/1020/6134/6234/6209/64422/6141/6223/6169/3684/6167/6173/6171/5058/84885/378706/3689/6210	57
BP	GO:0046636	negative regulation of alpha-beta T cell activation	18/2907	40/18866	8.39306e-06	0.000313172	0.000254772	135/3566/604/8764/11314/654346/3142/64115/4092/30009/80149/10859/29126/8651/284194/3965/6375/51043	18
BP	GO:0002720	positive regulation of cytokine production involved in immune response	22/2907	55/18866	9.10498e-06	0.000337702	0.000274728	3134/2867/5590/8764/567/3554/8809/10666/975/2865/10417/3805/10859/2207/4282/64127/3105/8482/2625/6375/388325/7099	22
BP	GO:0097237	cellular response to toxic substance	38/2907	122/18866	9.20597e-06	0.000339416	0.000276122	3039/6648/3040/65018/6415/3043/140809/4259/3240/10587/3049/3042/2954/23410/2878/241/3048/84817/4056/2946/6280/26034/51024/125336/51714/83667/4504/9973/573971/2947/3050/3047/213/7001/2168/3045/348/2944	38
BP	GO:0000422	autophagy of mitochondrion	28/2907	79/18866	9.31912e-06	0.000339545	0.000276227	11337/11152/8678/65018/55062/65991/11345/26100/8878/27429/79065/23710/84557/643246/81631/2931/2017/9140/10133/285973/2629/25793/10533/51024/6720/706/64422/23130	28
BP	GO:0061726	mitochondrion disassembly	28/2907	79/18866	9.31912e-06	0.000339545	0.000276227	11337/11152/8678/65018/55062/65991/11345/26100/8878/27429/79065/23710/84557/643246/81631/2931/2017/9140/10133/285973/2629/25793/10533/51024/6720/706/64422/23130	28
BP	GO:0002285	lymphocyte activation involved in immune response	52/2907	187/18866	9.73218e-06	0.000350786	0.000285372	7494/3134/8993/6556/2213/5590/5336/634/10459/3566/26253/604/602/5914/3958/8741/3142/5971/8809/4063/958/149840/975/51176/4092/30009/5450/246778/80149/10859/64218/2207/338339/10538/3383/3594/8320/3586/3955/959/3965/2625/940/930/6095/51043/84868/11151/257101/3458/3109/7099	52
BP	GO:0002286	T cell activation involved in immune response	35/2907	109/18866	9.74392e-06	0.000350786	0.000285372	6556/2213/5590/634/3566/26253/604/602/5914/3958/3142/5971/8809/4063/975/51176/4092/30009/246778/80149/10859/64218/2207/338339/10538/3383/3594/8320/3965/2625/6095/51043/84868/3458/3109	35
BP	GO:0002292	T cell differentiation involved in immune response	26/2907	71/18866	9.79755e-06	0.000350786	0.000285372	5590/3566/26253/604/602/5914/3142/5971/8809/4063/51176/4092/30009/246778/80149/64218/2207/338339/10538/3594/8320/3965/2625/6095/51043/3458	26
BP	GO:0001913	T cell mediated cytotoxicity	19/2907	44/18866	9.91253e-06	0.000350847	0.000285421	3134/2213/1512/634/51571/567/11035/3004/7264/3106/8772/10859/1075/3594/3105/5551/8417/6375/3575	19
BP	GO:0097028	dendritic cell differentiation	19/2907	44/18866	9.91253e-06	0.000350847	0.000285421	2213/640/64343/3106/1051/5971/55509/10288/10859/814/4055/10538/116071/6688/1236/55365/3965/28959/2623	19
BP	GO:0097530	granulocyte migration	44/2907	150/18866	1.06961e-05	0.000374305	0.000304505	3577/23604/3579/27202/5595/57126/120425/11314/8291/3958/51192/2919/728/3554/4354/101/6280/1441/56833/6283/683/6351/5196/1803/399/9750/2207/1240/5197/2529/6279/1236/6846/255231/6358/6348/6352/6375/6288/7057/5473/3689/6349/719	44
BP	GO:0010506	regulation of autophagy	84/2907	347/18866	1.06962e-05	0.000374305	0.000304505	29082/8517/7494/8897/1201/23604/527/65018/5296/9114/60673/7942/22933/10135/5595/51382/5566/6794/9528/27429/389541/10524/56834/64121/5571/53840/572/57535/201163/90410/4210/2931/533/171389/10542/1613/100287171/155066/9554/2017/10133/2629/6622/529/535/25793/3162/79142/79156/28956/1634/120892/10533/9638/1263/2081/80149/207/10018/84148/8851/2670/4864/83667/4504/526/6720/1020/8131/706/5768/29108/3586/8…	84
BP	GO:1990748	cellular detoxification	36/2907	114/18866	1.11329e-05	0.000387402	0.000315159	3039/6648/3040/6415/3043/140809/4259/3240/10587/3049/3042/2954/23410/2878/241/3048/84817/4056/2946/6280/26034/125336/51714/83667/4504/9973/573971/2947/3050/3047/213/7001/2168/3045/348/2944	36
BP	GO:0001562	response to protozoan	14/2907	27/18866	1.12456e-05	0.000389134	0.000316569	6556/1667/728358/2634/3566/383/602/283234/958/5196/64581/10538/116071/3586	14
BP	GO:0030099	myeloid cell differentiation	100/2907	431/18866	1.13755e-05	0.000391443	0.000318447	8370/10296/11025/4318/4831/60682/23210/3020/56834/22904/634/554313/2039/604/842/8563/65082/80349/3303/8363/567/5914/3021/10398/2778/3958/10312/7030/1051/5971/5916/8772/55509/1441/3600/2038/87/11006/3059/975/51176/677/25979/84661/5196/10859/10826/302/814/3304/84148/4057/4055/2207/212/2034/5153/116151/54997/669/10538/7422/3665/116071/4151/7305/6688/1236/8357/2539/29909/6223/3050/6886/9636/2625/1010…	100
BP	GO:0019722	calcium-mediated signaling	59/2907	222/18866	1.17701e-05	0.000402785	0.000327674	23261/3577/27040/6818/445329/375346/100137049/3579/2358/5566/6717/643/5336/1760/2039/374403/57192/5026/801/2281/8877/91860/3084/58515/933/2946/51643/5598/9034/11163/79041/1232/683/5025/120892/6546/51024/5164/6351/916/83988/5335/7535/126306/1240/2633/4772/2274/79772/9759/10663/55784/201191/1236/6403/6348/5795/10316/1230	59
BP	GO:0016049	cell growth	111/2907	490/18866	1.20587e-05	0.000408864	0.000332619	3611/112398/51079/728642/51009/3300/81565/55909/28988/58191/3020/1032/5590/29946/322/5300/3621/6794/51330/634/1785/10459/114804/29948/604/23011/11054/9798/201163/2931/10509/3303/400410/3021/56994/2664/2017/23327/84298/56848/9175/51548/3275/8877/984/10201/978/84717/10507/3475/54512/7869/780/57699/23136/5916/7251/2064/6280/1410/9150/1535/28956/5467/1382/203245/2137/6446/51176/323/26999/4092/51094/6…	111
BP	GO:0002704	negative regulation of leukocyte mediated immunity	21/2907	52/18866	1.21458e-05	0.000408864	0.000332619	3134/2213/409/634/383/604/11314/3106/3162/1378/4092/30009/3805/10859/3105/29/3965/722/6375/84868/3575	21
BP	GO:1903557	positive regulation of tumor necrosis factor superfamily cytokine production	21/2907	52/18866	1.21458e-05	0.000408864	0.000332619	1652/58515/101/54106/1191/8772/1535/10417/5196/2207/929/4282/64127/29108/914/6348/5795/23643/3458/7097/7099	21
BP	GO:0031295	T cell costimulation	22/2907	56/18866	1.28263e-05	0.000429438	0.000349357	9402/22914/8740/8764/3932/23308/2534/975/29126/1803/916/207/100133941/100528032/1236/115650/959/5133/940/5058/921/84433	22
BP	GO:0090312	positive regulation of protein deacetylation	12/2907	21/18866	1.31278e-05	0.0004369	0.000355427	65018/25855/604/122953/25865/26993/1487/120892/7422/6720/51043/3458	12
BP	GO:0070232	regulation of T cell apoptotic process	16/2907	34/18866	1.31902e-05	0.0004369	0.000355427	27166/11035/3958/101/171558/939/8772/29126/57864/3965/5133/6352/1942/3575/1831/155038	16
BP	GO:0002791	regulation of peptide secretion	90/2907	381/18866	1.47674e-05	0.00048654	0.00039581	7494/5715/135/2867/1595/2213/23568/26297/79971/11132/322/5289/406/6717/6810/338442/572/26253/65220/2029/283/9854/6804/55691/23410/640/2281/50855/777/10312/8398/101/933/79651/388581/54106/84300/958/6453/5467/240/3661/80024/5208/3993/291/84830/2865/8938/5066/5127/1803/26056/8651/18/9619/56253/2268/5906/929/4282/51714/51092/56943/7096/6720/55636/6279/415116/7100/91662/3586/959/6513/2852/23178/8754/8…	90
BP	GO:0032652	regulation of interleukin-1 production	35/2907	111/18866	1.51995e-05	0.000498124	0.000405234	5004/3603/409/353514/634/54/79792/4210/114769/8877/11027/80149/834/64581/22861/9447/64127/7305/29108/91662/3586/1236/3965/58484/5005/6348/55655/6288/84868/149628/51311/4332/3458/3315/7099	35
BP	GO:0016050	vesicle organization	82/2907	340/18866	1.56667e-05	0.000509864	0.000414785	29082/11267/51399/1201/126003/8907/1453/374666/51693/9570/55111/4600/9519/64400/27243/9482/9217/8775/5289/9218/8878/51160/2647/6810/208/116841/9146/93343/1785/6809/29911/2153/5265/9798/80183/6804/9554/55647/79720/5864/8877/23023/8291/6622/6890/83547/8677/149111/10016/1294/79156/27095/2157/7251/64601/64689/51652/7039/5990/966/23355/8938/5798/6386/55361/302/3267/1075/84519/84286/8773/10490/8766/459…	82
BP	GO:0002832	negative regulation of response to biotic stimulus	32/2907	98/18866	1.57223e-05	0.000509864	0.000414785	11277/7353/6397/3134/5094/22933/409/60343/634/383/114769/26007/4795/3106/11027/84166/5654/1378/56833/3805/10859/10906/4057/79132/3105/6223/3965/59307/5468/84868/11326/7001	32
BP	GO:1903556	negative regulation of tumor necrosis factor superfamily cytokine production	22/2907	57/18866	1.78672e-05	0.000576404	0.000468916	27202/5004/409/54/5914/4795/4157/64115/6504/80149/29126/4057/671/50856/706/3586/5443/3965/10457/84868/23547/7099	22
BP	GO:0032729	positive regulation of interferon-gamma production	24/2907	65/18866	1.81488e-05	0.000578396	0.000470537	6556/22914/51571/4049/602/3554/8809/54106/8772/10666/246778/916/64581/56253/100528032/929/3594/3105/29108/914/3965/84868/51311/7099	24
BP	GO:0045071	negative regulation of viral genome replication	23/2907	61/18866	1.81635e-05	0.000578396	0.000470537	8812/3669/51763/10581/200315/9218/8519/10318/60489/8638/5359/6590/10410/55337/80149/4057/4938/4599/84875/9636/6352/9582/3434	23
BP	GO:0030593	neutrophil chemotaxis	33/2907	103/18866	1.82091e-05	0.000578396	0.000470537	3577/23604/3579/27202/120425/8291/3958/51192/2919/728/4354/6280/1441/6283/683/6351/5196/1803/9750/2207/5197/6279/1236/6846/6358/6348/6352/6375/6288/5473/3689/6349/719	33
BP	GO:0032612	interleukin-1 production	37/2907	121/18866	1.90258e-05	0.00060081	0.000488771	5004/3603/409/353514/634/54/79792/4210/114769/8877/6284/11027/80149/834/64581/115362/22861/9447/64127/7305/29108/91662/3586/1236/3965/58484/5005/6348/55655/6288/84868/149628/51311/4332/3458/3315/7099	37
BP	GO:0046348	amino sugar catabolic process	9/2907	13/18866	1.91294e-05	0.00060081	0.000488771	80896/51005/55577/1117/1118/1116/4245/5973/1486	9
BP	GO:0002707	negative regulation of lymphocyte mediated immunity	18/2907	42/18866	1.92057e-05	0.00060081	0.000488771	3134/2213/409/634/383/604/3106/1378/4092/30009/3805/10859/3105/3965/722/6375/84868/3575	18
BP	GO:0002218	activation of innate immune response	42/2907	144/18866	1.9537e-05	0.000608103	0.000494704	8517/5715/6500/5700/5719/2867/81030/9782/5683/3385/5687/5698/5566/5336/22914/26253/5699/3384/11027/2534/5710/5971/5894/200958/2219/9491/3055/9861/2207/100528032/338339/50856/9447/29108/5721/58484/5058/149628/10462/84433/4332/7099	42
BP	GO:0062207	regulation of pattern recognition receptor signaling pathway	32/2907	99/18866	1.98334e-05	0.000614241	0.000499698	2874/7353/6397/409/9958/10211/171389/3303/26007/4795/3659/11314/23098/353376/11027/54106/1535/57864/3304/4057/115352/79132/3665/929/7096/7100/285852/23643/23547/57162/7097/7099	32
BP	GO:0070555	response to interleukin-1	56/2907	211/18866	2.02252e-05	0.000623257	0.000507033	8517/5715/6500/5700/5603/5719/7335/81030/5683/5687/5698/5595/2634/7311/8878/3557/3934/7850/7316/5699/54472/1116/55611/6622/3554/5710/1051/958/1535/6351/80149/9491/9861/2633/8692/79155/246330/3383/9759/64127/29108/166/5721/3965/3176/6846/6358/6095/6348/6352/6375/3556/57162/7314/2113/6349	56
BP	GO:0007596	blood coagulation	82/2907	343/18866	2.20111e-05	0.000674935	0.000549074	3611/135/3043/79001/3020/5595/10938/5547/5566/409/5336/1606/57126/634/2039/51317/10603/23348/2153/7056/5265/3021/5026/10398/2778/340205/640/3659/1465/5359/23533/54331/3705/10855/3048/3932/2812/2534/2815/2157/958/10627/3848/5329/5894/5025/2161/9158/84830/953/966/5583/5196/302/2207/18/5575/5197/3937/8357/959/2625/308/6403/64780/3674/3047/2335/3690/6288/23764/7057/6521/8351/2623/928/7001/3045/350/33…	82
BP	GO:0006941	striated muscle contraction	49/2907	178/18866	2.32003e-05	0.000704828	0.000573392	51130/6901/5566/7168/6717/226/5606/1760/4635/29098/23327/6324/801/2281/274/5608/7136/4607/2946/79041/5025/4092/3753/6546/80149/126306/9759/7134/3759/7139/7138/4151/113246/5997/7140/4633/3784/2258/9826/1824/5224/102723475/4625/7125/8557/4634/4632/2548/7135	49
BP	GO:0050777	negative regulation of immune response	45/2907	159/18866	2.32446e-05	0.000704828	0.000573392	11277/3134/8993/2213/409/60343/634/3566/383/604/8764/171389/1604/11314/3958/3106/3162/3142/84166/1378/56833/966/4092/30009/3805/80149/10859/10906/79132/3105/29/3586/6223/3965/5133/722/64092/5468/6375/51043/84868/3575/9173/11326/336	45
BP	GO:0035821	modulation of process of other organism	35/2907	113/18866	2.33274e-05	0.000704828	0.000573392	8812/51763/1667/9217/728358/6256/9218/10318/572/79792/1668/1072/6590/3482/5091/6280/9150/10910/10533/51176/598/3429/6351/80149/302/10018/4057/8692/1669/8408/6348/6352/5967/358/348	35
BP	GO:0043254	regulation of protein-containing complex assembly	102/2907	449/18866	2.3714e-05	0.000713032	0.000580067	653440/374666/65018/2073/24139/22933/28988/2968/205251/3020/22924/10093/51112/8775/11078/5590/7114/10273/5526/51571/2039/24144/10092/6904/5908/23406/637/389/5494/89848/4210/29098/3303/7408/6804/64853/3021/100287171/2017/5864/274/10458/10435/129293/81857/3958/4204/2629/6622/3084/2966/7013/1191/64601/2314/1410/10602/581/5894/3059/7480/51466/26999/9026/8631/6119/4641/10018/3055/8115/3304/7111/8851/6…	102
BP	GO:0097529	myeloid leukocyte migration	58/2907	222/18866	2.39764e-05	0.00071744	0.000583652	3577/23604/1652/3579/27202/2358/5595/57126/120425/11314/8291/3958/51192/2919/728/3554/4354/101/6280/1441/56833/6283/683/5025/975/4485/4681/6351/5196/1803/399/9750/2207/1240/5197/2529/7422/4282/7941/6279/1236/6223/6846/255231/5641/6358/6348/6352/6375/6288/7057/1588/5473/3689/1230/928/6349/719	58
BP	GO:0043123	positive regulation of I-kappaB kinase/NF-kappaB signaling	51/2907	188/18866	2.46405e-05	0.000733767	0.000596935	8517/1936/497661/65018/7335/8837/653519/79971/6398/9218/8717/9516/55072/53840/389/5494/7329/10542/114769/142678/57153/80216/6284/51246/353376/2534/3162/54106/8772/958/6283/3661/80833/54862/207/81858/834/4057/4055/7052/79155/64127/356/1236/92610/3965/6275/57162/8743/84433/7099	51
BP	GO:0051235	maintenance of location	78/2907	324/18866	2.66833e-05	0.000790795	0.000643328	51608/6500/23345/2495/65018/2867/825/84649/54923/205251/23568/440503/10938/7114/51099/5566/26580/6717/5336/2512/6672/3934/57192/602/8996/4793/801/2281/8291/3932/6622/8694/11079/2946/6280/79041/1535/5467/581/80024/400916/6546/4681/80149/161247/207/5335/8605/84266/718/126306/9619/1020/1066/4481/55636/356/6279/706/3586/1236/2934/1627/2852/255231/3074/930/6348/5468/6375/3690/213/123/11151/1649/2548/2…	78
BP	GO:0043161	proteasome-mediated ubiquitin-dependent protein catabolic process	97/2907	424/18866	2.77687e-05	0.000816528	0.000664263	90864/5715/6500/246184/5700/5719/51009/3300/1453/55743/7353/10296/10612/25906/5094/51529/22933/5683/5527/5687/5698/9683/117584/7320/79016/130617/7311/56658/997/406/409/10273/10524/55139/253980/7316/79734/196394/11060/7323/2931/5699/116988/55968/3303/118424/26268/23327/51548/55336/10755/51035/2629/64777/93611/4287/26232/5710/150684/25820/57414/1191/6468/83892/79176/120892/7480/7328/4092/1263/30009…	97
BP	GO:0051607	defense response to virus	65/2907	258/18866	2.78152e-05	0.000816528	0.000664263	11277/3669/7268/10379/7353/8678/6397/10581/81030/4600/5094/81559/1667/728358/200315/9958/8519/53840/60489/8638/11035/55324/26007/3659/5359/1668/54512/10410/58515/197259/84166/54106/55337/8772/958/3600/5654/3661/10533/598/10417/3429/246778/80149/10859/2633/8692/4938/83666/79132/3665/4599/9447/3594/439996/29108/54541/5551/3433/9636/9582/51311/3434/3437/3458	65
BP	GO:0010498	proteasomal protein catabolic process	108/2907	483/18866	2.82155e-05	0.000824371	0.000670643	90864/51608/5715/6500/246184/5700/5719/51009/3300/1453/55743/7353/65018/10296/10612/25906/5094/51529/22933/5683/5527/5687/5698/11345/9683/117584/80700/7320/79016/130617/7311/5566/56658/997/406/409/10273/10524/55139/253980/7316/79734/196394/11060/7323/81502/2931/5699/116988/55968/3303/118424/9810/26268/23327/51548/57333/55336/10755/51035/2629/64777/93611/4287/26232/5710/150684/25820/57414/1191/646…	108
BP	GO:0050672	negative regulation of lymphocyte proliferation	27/2907	79/18866	2.84138e-05	0.000826268	0.000672186	2213/8379/383/8764/640/11314/654346/1051/23495/2064/10288/64115/7940/10859/29126/56253/7305/284194/3586/3965/10457/6375/51043/84868/57162/11326/4332	27
BP	GO:1903038	negative regulation of leukocyte cell-cell adhesion	40/2907	137/18866	2.96727e-05	0.000858845	0.000698688	135/2213/8379/634/3566/383/604/8764/3659/11314/654346/3958/3142/1051/2064/10288/84830/64115/4092/201633/30009/80149/10859/29126/207/1840/8651/9750/56253/284194/3586/3965/10457/3902/6375/51043/84868/57162/11326/7001	40
BP	GO:0046470	phosphatidylcholine metabolic process	29/2907	88/18866	3.18558e-05	0.000909237	0.000739683	1120/1460/10809/100137049/162466/137964/255043/56994/79888/57153/151056/10162/129642/79153/4204/8398/10908/79887/11145/2181/5130/58488/8605/5920/7941/43/5320/341/336	29
BP	GO:0051648	vesicle localization	59/2907	229/18866	3.18987e-05	0.000909237	0.000739683	8517/51399/1201/126003/57234/1453/65018/51693/9570/55062/81565/4600/10948/10239/8775/5590/6794/10540/2647/1785/2153/91978/5265/65082/9554/5413/5864/118426/10312/10749/149111/54820/10016/1294/4648/92558/8825/27095/2157/4542/64689/7039/120892/966/4643/1075/4641/8773/8766/4599/6854/1020/26115/8452/146439/5728/8120/474384/23095	59
BP	GO:0001773	myeloid dendritic cell activation	14/2907	29/18866	3.2033e-05	0.000909237	0.000739683	2323/5971/55509/6504/814/4055/338339/10538/116071/29108/6688/3586/914/84868	14
BP	GO:0002755	MyD88-dependent toll-like receptor signaling pathway	16/2907	36/18866	3.21477e-05	0.000909237	0.000739683	7311/10318/7316/3659/11314/54106/3665/929/7096/7100/81793/23643/51311/7314/7097/7099	16
BP	GO:0046633	alpha-beta T cell proliferation	16/2907	36/18866	3.21477e-05	0.000909237	0.000739683	8764/1604/3659/654346/3600/975/64115/29126/916/7535/3105/284194/3965/940/6375/51043	16
BP	GO:0002287	alpha-beta T cell activation involved in immune response	23/2907	63/18866	3.32644e-05	0.000926304	0.000753567	5590/3566/604/602/5914/3142/5971/8809/4063/51176/4092/30009/246778/80149/64218/10538/3594/8320/3965/2625/6095/51043/3458	23
BP	GO:0002293	alpha-beta T cell differentiation involved in immune response	23/2907	63/18866	3.32644e-05	0.000926304	0.000753567	5590/3566/604/602/5914/3142/5971/8809/4063/51176/4092/30009/246778/80149/64218/10538/3594/8320/3965/2625/6095/51043/3458	23
BP	GO:0032613	interleukin-10 production	23/2907	63/18866	3.32644e-05	0.000926304	0.000753567	2213/5590/353514/54106/64115/201633/10859/29126/2207/64581/11334/4317/64127/7305/29108/28951/959/3965/9636/940/6375/7097/7099	23
BP	GO:0050708	regulation of protein secretion	83/2907	352/18866	3.33921e-05	0.000926304	0.000753567	7494/5715/135/1595/2213/23568/26297/79971/11132/322/5289/406/6717/6810/338442/572/26253/65220/2029/283/9854/6804/55691/23410/640/2281/50855/777/10312/8398/101/933/79651/388581/54106/84300/958/5467/240/3661/80024/5208/3993/291/84830/8938/5066/5127/1803/26056/8651/18/9619/56253/2268/5906/929/4282/51092/56943/7096/6720/415116/7100/91662/3586/959/6513/2852/8754/81793/43/6352/5950/6288/2752/51311/7293…	83
BP	GO:0046642	negative regulation of alpha-beta T cell proliferation	8/2907	11/18866	3.34989e-05	0.000926304	0.000753567	8764/654346/64115/29126/284194/3965/6375/51043	8
BP	GO:1901216	positive regulation of neuron death	31/2907	97/18866	3.40639e-05	0.000937741	0.000762872	2213/5300/997/4835/572/842/2931/23368/6622/23098/2534/1191/4296/581/51024/10018/8851/155061/9759/1020/356/7305/54541/26471/3684/712/6348/3689/1649/3458/7099	31
BP	GO:0002688	regulation of leukocyte chemotaxis	37/2907	124/18866	3.45843e-05	0.000947856	0.0007711	23604/1652/3579/27202/2358/5595/22914/11240/8740/8291/63940/728/4354/56833/683/80024/4485/4681/6351/1803/9750/1240/100528032/7422/4282/7941/1236/3965/6846/5641/6348/6352/6375/7057/1588/1230/719	37
BP	GO:0002708	positive regulation of lymphocyte mediated immunity	33/2907	106/18866	3.51393e-05	0.000954619	0.000776602	3134/8807/5590/22914/10459/51571/4049/567/8741/3106/3554/259197/8809/8772/958/10666/149840/975/30009/3805/117157/2207/718/56253/100528032/3594/3105/8417/2625/940/3902/6375/2208	33
BP	GO:0046632	alpha-beta T cell differentiation	33/2907	106/18866	3.51393e-05	0.000954619	0.000776602	5590/3566/604/602/5914/3659/3142/5971/8809/4063/3702/51176/4092/639/6932/30009/246778/80149/8651/64218/7535/2529/10538/3594/8320/1514/3965/2625/6095/944/51043/257101/3458	33
BP	GO:0051091	positive regulation of DNA-binding transcription factor activity	67/2907	270/18866	3.53243e-05	0.000955452	0.00077728	8517/65018/825/7335/8807/28232/5687/8837/5590/90933/7311/306/8717/10211/55072/5526/53840/7316/10542/3303/11035/114769/8896/9175/8877/25865/4791/101/8809/54106/1191/64320/958/7185/10987/6280/6788/6283/3059/7480/5583/207/3304/4057/7422/10014/3383/9759/9447/64127/6279/29108/3586/5728/959/3965/58484/5468/3689/3556/1649/150372/84433/7314/2319/7097/7099	67
BP	GO:0002573	myeloid leukocyte differentiation	55/2907	210/18866	3.56828e-05	0.000960953	0.000781756	11025/4318/4831/56834/22904/634/8563/5914/2778/10312/7030/1051/5971/8772/55509/3600/11006/3059/975/51176/677/25979/5196/10859/302/814/4057/4055/2207/5153/54997/10538/7422/3665/116071/7305/6688/1236/6886/2625/10100/6348/5468/126014/714/9398/1230/2623/4495/1053/3458/3976/7097/7099/9935	55
BP	GO:0032945	negative regulation of mononuclear cell proliferation	27/2907	80/18866	3.66501e-05	0.00098273	0.000799471	2213/8379/383/8764/640/11314/654346/1051/23495/2064/10288/64115/7940/10859/29126/56253/7305/284194/3586/3965/10457/6375/51043/84868/57162/11326/4332	27
BP	GO:0007599	hemostasis	82/2907	348/18866	3.81018e-05	0.0010168	0.000827186	3611/135/3043/79001/3020/5595/10938/5547/5566/409/5336/1606/57126/634/2039/51317/10603/23348/2153/7056/5265/3021/5026/10398/2778/340205/640/3659/1465/5359/23533/54331/3705/10855/3048/3932/2812/2534/2815/2157/958/10627/3848/5329/5894/5025/2161/9158/84830/953/966/5583/5196/302/2207/18/5575/5197/3937/8357/959/2625/308/6403/64780/3674/3047/2335/3690/6288/23764/7057/6521/8351/2623/928/7001/3045/350/33…	82
BP	GO:0043547	positive regulation of GTPase activity	93/2907	406/18866	3.82489e-05	0.0010168	0.000827186	83874/10156/81565/30851/60682/51256/9744/4739/11033/8498/126432/54828/5300/64333/100271927/208/23092/83478/23329/10144/119016/414059/5998/6904/23348/374403/9605/26037/201163/55843/116988/64411/729540/2041/201176/116985/2664/84173/57568/26230/57139/10435/10507/8787/23380/10636/958/2064/9628/9732/9610/3993/120892/79735/23216/10681/9138/55738/6351/3267/729857/9938/79890/5906/3383/9922/1901/84220/813…	93
BP	GO:0046640	regulation of alpha-beta T cell proliferation	15/2907	33/18866	4.09917e-05	0.00108253	0.000880662	8764/1604/3659/654346/975/64115/29126/916/7535/3105/284194/3965/940/6375/51043	15
BP	GO:0050663	cytokine secretion	25/2907	72/18866	4.10712e-05	0.00108253	0.000880662	2213/26253/56848/6284/8291/54106/6283/3661/8651/56253/2268/929/4282/64127/7096/7100/3937/91662/3586/81793/6288/51311/7293/3458/7097	25
BP	GO:0008637	apoptotic mitochondrial changes	37/2907	125/18866	4.19216e-05	0.00110026	0.000895087	57048/27141/6648/65018/4318/27113/27166/409/572/637/2931/3303/56947/8996/92609/23368/8398/1191/3002/5329/89941/581/203245/291/400916/598/51024/9026/207/10018/51025/26355/29108/64422/3433/2852/8743	37
BP	GO:0050817	coagulation	82/2907	349/18866	4.24092e-05	0.00110837	0.000901679	3611/135/3043/79001/3020/5595/10938/5547/5566/409/5336/1606/57126/634/2039/51317/10603/23348/2153/7056/5265/3021/5026/10398/2778/340205/640/3659/1465/5359/23533/54331/3705/10855/3048/3932/2812/2534/2815/2157/958/10627/3848/5329/5894/5025/2161/9158/84830/953/966/5583/5196/302/2207/18/5575/5197/3937/8357/959/2625/308/6403/64780/3674/3047/2335/3690/6288/23764/7057/6521/8351/2623/928/7001/3045/350/33…	82
BP	GO:0002820	negative regulation of adaptive immune response	19/2907	48/18866	4.36521e-05	0.00113606	0.000924205	3134/2213/634/3566/383/604/8764/1378/4092/30009/80149/10859/722/64092/6375/51043/84868/3575/9173	19
BP	GO:0070997	neuron death	84/2907	360/18866	4.47545e-05	0.00115987	0.000943581	3611/29082/56616/8517/112398/135/5700/1201/6818/6648/65018/445329/3134/10135/2213/5300/997/409/4671/27429/4835/208/9244/572/637/842/2931/112399/23368/2047/4204/2629/6622/23098/728/353116/25793/2534/101/3162/1051/1191/8772/6453/4296/581/120892/10533/598/5423/51024/207/10018/8851/155061/22800/9759/22861/4504/1020/26355/3812/356/7305/54541/3586/7133/2539/26471/3684/10457/2625/712/5641/6348/6352/1115…	84
BP	GO:0032653	regulation of interleukin-10 production	22/2907	60/18866	4.53795e-05	0.00117117	0.000952771	2213/5590/353514/54106/64115/201633/10859/29126/2207/64581/11334/4317/64127/7305/29108/28951/959/3965/940/6375/7097/7099	22
BP	GO:0019320	hexose catabolic process	21/2907	56/18866	4.56813e-05	0.00117407	0.000955126	5223/2582/226/132158/572/230/5213/2584/26007/2027/3101/5208/669/2529/2026/130589/5236/8277/5224/216/229	21
BP	GO:0044804	autophagy of nucleus	9/2907	14/18866	4.62023e-05	0.00118255	0.000962028	11152/55062/26100/79065/9140/285973/10533/64422/23130	9
BP	GO:0051650	establishment of vesicle localization	55/2907	212/18866	4.73371e-05	0.00120661	0.000981602	8517/51399/1201/126003/57234/1453/65018/51693/9570/55062/81565/4600/10948/10239/8775/5590/6794/10540/2647/1785/2153/5265/9554/5413/5864/118426/10312/10749/149111/54820/10016/1294/4648/92558/8825/27095/2157/4542/64689/7039/120892/966/4643/1075/4641/8773/8766/4599/1020/26115/8452/146439/8120/474384/23095	55
BP	GO:0019882	antigen processing and presentation	59/2907	232/18866	4.78087e-05	0.00121356	0.000987252	8517/968/10437/5715/3831/11277/5700/5719/8907/11258/3134/653361/5683/6556/5687/5698/2213/1512/10540/1785/2210/2209/5699/567/9554/3693/3106/6890/83547/5710/5971/10288/1535/160/9363/925/4688/1175/9491/3107/9861/2207/8773/50856/3383/64127/6891/3105/29108/3112/1514/1236/5721/5641/3902/4689/7057/3117/3109	59
BP	GO:0051604	protein maturation	71/2907	293/18866	4.80015e-05	0.00121356	0.000987252	27141/8260/654483/1201/83874/552900/9789/55851/79903/3240/28972/1889/9159/81619/5289/5566/1512/9528/10273/27429/4311/2678/7850/572/284106/29100/81502/6687/114769/8996/220064/90701/2281/831/10162/7123/64788/122961/715/101/10098/151516/1203/8772/120892/2161/64115/26262/26999/25825/5046/27344/834/54997/23478/444/1066/9973/29108/55848/1514/2934/83464/58484/8530/5641/51218/7057/350/9509/871	71
BP	GO:0009306	protein secretion	103/2907	462/18866	4.84651e-05	0.00121799	0.000990863	7494/5715/4253/135/4087/1595/2213/23568/26297/79971/11132/322/5289/406/6717/6810/338442/3557/128989/2039/572/26253/65220/2029/283/9854/6804/55691/23410/640/56848/5864/2281/57333/50855/777/6284/64788/8291/10312/8398/101/933/79651/388581/54106/84300/958/5467/240/6283/3661/80024/5208/5894/3993/291/84830/8938/5798/5066/5127/1803/26056/8651/51167/64840/18/9619/56253/2268/5906/374969/929/4282/51714/510…	103
BP	GO:0062208	positive regulation of pattern recognition receptor signaling pathway	16/2907	37/18866	4.85703e-05	0.00121799	0.000990863	9958/10211/3303/353376/54106/1535/57864/3304/4057/79132/7096/7100/285852/57162/7097/7099	16
BP	GO:0001911	negative regulation of leukocyte mediated cytotoxicity	11/2907	20/18866	4.93743e-05	0.00123316	0.0010032	3134/2213/409/634/3106/3805/10859/3105/3965/84868/3575	11
BP	GO:0071347	cellular response to interleukin-1	49/2907	183/18866	5.06516e-05	0.00125755	0.00102304	8517/5715/6500/5700/5603/5719/7335/81030/5683/5687/5698/5595/2634/7311/8878/3557/3934/7850/7316/5699/54472/1116/55611/3554/5710/1051/958/6351/80149/9491/9861/2633/8692/79155/246330/3383/64127/29108/5721/6846/6358/6095/6348/6352/6375/3556/57162/7314/6349	49
BP	GO:0031065	positive regulation of histone deacetylation	10/2907	17/18866	5.07566e-05	0.00125755	0.00102304	65018/604/122953/25865/26993/1487/120892/7422/6720/51043	10
BP	GO:0035666	TRIF-dependent toll-like receptor signaling pathway	14/2907	30/18866	5.1563e-05	0.00127243	0.00103515	8517/7311/7316/7323/353376/8772/958/3661/3665/929/7321/23643/7314/7099	14
BP	GO:0044282	small molecule catabolic process	101/2907	452/18866	5.19976e-05	0.00127807	0.00103973	7920/30/10588/2109/6818/51763/445329/593/7378/2710/1375/217/3029/5223/440503/4051/200315/84129/80896/51005/55577/23670/208/2582/226/10005/55825/132158/572/383/60489/230/8942/5213/6817/2584/2931/2954/27034/4357/55268/3073/26007/3155/2027/51733/978/4245/51380/3632/66002/1666/1890/3101/5973/5467/5208/875/84830/1632/953/23600/3081/1593/6342/10295/8309/207/18/51390/8692/30833/669/2529/2026/83667/4504/…	101
BP	GO:0002474	antigen processing and presentation of peptide antigen via MHC class I	31/2907	99/18866	5.29065e-05	0.00129394	0.00105265	8517/10437/5715/5700/5719/3134/653361/5683/5687/5698/2210/2209/5699/567/9554/3693/3106/6890/5710/1535/4688/9491/3107/9861/2207/8773/50856/6891/3105/5721/4689	31
BP	GO:0035592	establishment of protein localization to extracellular region	103/2907	463/18866	5.30611e-05	0.00129394	0.00105265	7494/5715/4253/135/4087/1595/2213/23568/26297/79971/11132/322/5289/406/6717/6810/338442/3557/128989/2039/572/26253/65220/2029/283/9854/6804/55691/23410/640/56848/5864/2281/57333/50855/777/6284/64788/8291/10312/8398/101/933/79651/388581/54106/84300/958/5467/240/6283/3661/80024/5208/5894/3993/291/84830/8938/5798/5066/5127/1803/26056/8651/51167/64840/18/9619/56253/2268/5906/374969/929/4282/51714/510…	103
BP	GO:0002709	regulation of T cell mediated immunity	25/2907	73/18866	5.34038e-05	0.00129719	0.00105529	3134/2213/5590/634/51571/383/567/11035/3106/3554/8809/8772/975/4092/30009/10859/2529/3594/3105/7133/8417/2625/6375/3575/1178	25
BP	GO:0042269	regulation of natural killer cell mediated cytotoxicity	17/2907	41/18866	5.44525e-05	0.0013175	0.00107181	3134/8807/409/634/22914/9437/3106/259197/10666/3805/10859/56253/100528032/3105/3965/3902/84868	17
BP	GO:0002715	regulation of natural killer cell mediated immunity	18/2907	45/18866	5.8582e-05	0.0014119	0.00114861	3134/8807/409/634/22914/9437/3106/259197/10666/3805/10859/117157/56253/100528032/3105/3965/3902/84868	18
BP	GO:0019318	hexose metabolic process	63/2907	254/18866	6.03933e-05	0.00144991	0.00117953	5372/51763/10296/51547/84649/5223/5261/60343/5210/79660/208/2582/226/132158/572/51363/230/1390/5213/80183/2584/2931/5209/26007/2027/5373/388581/4351/7033/5091/3101/5467/5208/4485/51094/5164/23275/207/669/4938/2529/2026/347/83667/231/130589/51181/5236/5443/2539/8277/57001/23178/4123/6095/5224/5509/5950/2203/5166/2548/216/229	63
BP	GO:1901214	regulation of neuron death	76/2907	321/18866	6.08319e-05	0.0014548	0.00118351	3611/29082/8517/112398/135/5700/1201/6818/6648/65018/445329/3134/2213/5300/997/409/4671/27429/4835/9244/572/842/2931/112399/23368/2047/4204/2629/6622/23098/728/353116/25793/2534/101/3162/1051/1191/6453/4296/581/120892/10533/598/51024/207/10018/8851/155061/22800/9759/4504/1020/3812/356/7305/54541/3586/7133/2539/26471/3684/10457/2625/712/5641/6348/6352/11151/3689/1649/7314/3458/348/4035/7099	76
BP	GO:0071692	protein localization to extracellular region	104/2907	470/18866	6.12171e-05	0.00145838	0.00118642	7494/5715/4253/135/4087/1595/2213/23568/26297/79971/11132/322/5289/406/6717/6810/338442/3557/128989/2039/572/26253/65220/2029/283/9854/6804/55691/23410/640/56848/5864/2281/57333/50855/777/6284/64788/8291/10312/8398/101/933/79651/388581/54106/84300/958/5467/240/6283/3661/80024/5208/5894/3993/291/84830/8938/5798/4681/5066/5127/1803/26056/8651/51167/64840/18/9619/56253/2268/5906/374969/929/4282/5171…	104
BP	GO:0019693	ribose phosphate metabolic process	96/2907	427/18866	6.17841e-05	0.00146625	0.00119282	11277/6818/65018/445329/7378/84649/4831/55229/2987/5223/203/10476/7114/6901/5635/137964/4598/5210/518/226/10005/60490/5571/2180/196883/572/230/8942/23597/5213/9605/4597/6817/2584/201163/2954/7086/5209/3155/2027/56848/8459/80025/51548/5138/539/10201/9551/8694/440672/4354/65990/256281/11163/23305/3101/5208/120892/2181/8573/9524/5164/8460/8021/9567/516/514/5141/669/122622/521/513/9759/2026/80221/523…	96
BP	GO:0016482	cytosolic transport	45/2907	165/18866	6.25622e-05	0.00147905	0.00120324	79585/653440/11267/1201/83874/10139/8678/374666/9570/55062/55111/64400/9482/5595/5289/2580/5605/90196/29911/374403/23011/29886/26088/100287171/80148/83547/10749/8677/1203/160/51652/120892/6642/79735/8938/10490/23258/1066/26115/404636/23095/55658/57533/11151/6272	45
BP	GO:0002756	MyD88-independent toll-like receptor signaling pathway	15/2907	34/18866	6.29403e-05	0.00148233	0.0012059	8517/7311/7316/7323/23098/353376/8772/958/3661/3665/929/7321/23643/7314/7099	15
BP	GO:0032102	negative regulation of response to external stimulus	97/2907	433/18866	6.55145e-05	0.00153711	0.00125047	11277/2874/135/7353/1652/6397/3134/5094/8993/22933/27202/2213/2358/409/4598/60343/634/22914/7850/284207/11240/54/383/7056/4210/171389/10509/7130/114769/26007/4795/10162/10507/3106/2629/83999/11027/7869/388581/84166/5598/3848/5329/5654/1378/56833/5467/240/2161/84830/8573/4681/3805/80149/10859/10906/302/89790/1803/64218/81858/4057/18/10501/100528032/79132/347/4282/3105/29/29108/91662/3586/5728/7133…	97
BP	GO:0016052	carbohydrate catabolic process	52/2907	200/18866	7.05934e-05	0.00164701	0.00133988	11277/2710/5223/5261/4758/5210/79660/2582/226/5571/132158/572/230/5213/1118/2584/8972/2931/5209/26007/2027/801/51548/3101/5208/5837/8021/669/2529/9759/2026/5256/130589/51181/5236/54541/8277/26471/1486/11182/3074/5836/4123/5224/5509/2203/6521/2548/313/216/229/3458	52
BP	GO:0000302	response to reactive oxygen species	59/2907	235/18866	7.07304e-05	0.00164701	0.00133988	3039/11277/8428/5603/6648/3040/65018/4318/653361/8807/3043/3240/8837/84334/5595/7168/10587/55139/3934/1785/572/383/84557/5829/59338/116988/11035/23410/2281/8877/10494/2534/3162/5598/1410/120892/1263/6546/5798/5164/207/8692/347/83667/4504/9973/4151/3586/1236/573971/8754/358/1545/51314/1471/2113/7001/2168/348	59
BP	GO:0046486	glycerolipid metabolic process	97/2907	434/18866	7.18307e-05	0.00165671	0.00134777	7920/57048/1120/8897/1201/65258/51763/1460/5296/10809/2710/100137049/84649/162466/2358/440503/6901/5289/51099/5279/137964/255043/5336/1606/51227/2180/5338/51205/283/59338/5283/56994/9489/79888/660/100996939/57153/151056/80025/10162/129642/79153/5359/23533/64788/10998/4204/375133/8694/8398/10908/5833/79887/3632/145567/11145/9651/64419/2181/5130/255919/10423/55529/55361/58488/8651/8605/718/285848/5…	97
BP	GO:0032689	negative regulation of interferon-gamma production	16/2907	38/18866	7.19494e-05	0.00165671	0.00134777	8993/5914/654346/64115/80149/10859/29126/284194/3586/3965/2625/6375/84868/9173/1649/7099	16
BP	GO:0032733	positive regulation of interleukin-10 production	16/2907	38/18866	7.19494e-05	0.00165671	0.00134777	5590/353514/54106/201633/29126/2207/64581/11334/64127/29108/959/3965/940/6375/7097/7099	16
BP	GO:0098581	detection of external biotic stimulus	12/2907	24/18866	7.67461e-05	0.00176061	0.0014323	8993/4671/721/3106/64581/64127/7096/3105/58484/23643/7097/7099	12
BP	GO:0002228	natural killer cell mediated immunity	23/2907	66/18866	7.72027e-05	0.00176455	0.0014355	3134/8807/409/634/22914/9437/3824/3106/259197/3002/10666/3805/10859/3811/117157/56253/100528032/3105/3965/57823/3902/84868/11151	23
BP	GO:1902622	regulation of neutrophil migration	17/2907	42/18866	7.84203e-05	0.00178579	0.00145278	23604/3579/27202/8291/728/3554/4354/101/56833/683/1803/399/9750/2529/1236/6375/719	17
BP	GO:0002294	CD4-positive, alpha-beta T cell differentiation involved in immune response	22/2907	62/18866	8.0553e-05	0.00182447	0.00148424	5590/3566/604/602/5914/3142/5971/8809/4063/51176/4092/30009/246778/80149/64218/10538/3594/3965/2625/6095/51043/3458	22
BP	GO:0032637	interleukin-8 production	31/2907	101/18866	8.07077e-05	0.00182447	0.00148424	2867/27202/7114/602/10542/3303/307/25865/1116/11027/54106/8772/2219/3304/671/64581/8692/929/64127/7096/29108/7100/3586/914/3965/51311/1649/10394/7097/336/7099	31
BP	GO:0055076	transition metal ion homeostasis	39/2907	138/18866	8.16856e-05	0.00183986	0.00149676	6500/654483/4738/2495/9114/552900/6556/475/147007/3163/23479/51312/6717/2512/3934/10058/55630/1318/4501/567/113235/4494/3932/79689/3162/150684/6280/2038/4057/212/2034/8692/91252/4504/4502/6279/4493/4495/3458	39
BP	GO:0071260	cellular response to mechanical stimulus	26/2907	79/18866	8.21226e-05	0.001843	0.00149932	5595/572/943/8740/22927/8738/3659/5138/838/8772/958/1535/207/9750/834/4055/9759/3759/1647/7100/1265/6513/9531/358/51311/7099	26
BP	GO:2001236	regulation of extrinsic apoptotic signaling pathway	44/2907	162/18866	8.33441e-05	0.00186366	0.00151613	162989/8837/117584/27429/6810/85450/8717/51330/6672/8742/637/3303/1613/8996/2017/4118/3958/2534/3162/5598/8772/7185/6788/5894/598/5196/207/3304/4055/6423/7078/8692/55437/50486/246330/3383/356/29108/5728/2852/7057/2623/8743/7001	44
BP	GO:0032760	positive regulation of tumor necrosis factor production	19/2907	50/18866	8.43643e-05	0.00187478	0.00152517	1652/58515/54106/1191/8772/1535/10417/5196/2207/929/4282/64127/29108/914/6348/5795/23643/7097/7099	19
BP	GO:0006968	cellular defense response	20/2907	54/18866	8.44467e-05	0.00187478	0.00152517	135/8678/3579/653361/9437/4046/10312/728/10578/10288/1232/3702/3805/4688/3812/7305/9214/5551/23643/4332	20
BP	GO:0035739	CD4-positive, alpha-beta T cell proliferation	8/2907	12/18866	8.68457e-05	0.00191431	0.00155733	1604/654346/975/64115/29126/284194/3965/6375	8
BP	GO:2000561	regulation of CD4-positive, alpha-beta T cell proliferation	8/2907	12/18866	8.68457e-05	0.00191431	0.00155733	1604/654346/975/64115/29126/284194/3965/6375	8
BP	GO:0032651	regulation of interleukin-1 beta production	30/2907	97/18866	8.94276e-05	0.00196423	0.00159795	5004/409/353514/54/79792/4210/114769/8877/11027/80149/834/64581/22861/9447/64127/7305/29108/91662/1236/3965/58484/5005/6348/55655/149628/51311/4332/3458/3315/7099	30
BP	GO:0030168	platelet activation	43/2907	158/18866	9.48805e-05	0.00207664	0.00168939	3611/3043/5595/409/5336/1606/634/2039/7056/10398/2778/340205/640/1465/5359/23533/54331/3932/2812/2534/2815/2157/958/10627/5894/9158/5583/5196/2207/18/5197/3937/959/6403/3674/2335/3690/6288/2623/928/3315/348/7099	43
BP	GO:0032677	regulation of interleukin-8 production	29/2907	93/18866	9.88407e-05	0.0021557	0.00175371	2867/27202/7114/602/10542/3303/307/25865/54106/8772/2219/3304/671/64581/8692/929/64127/7096/29108/7100/3586/914/3965/51311/1649/10394/7097/336/7099	29
BP	GO:0097202	activation of cysteine-type endopeptidase activity	9/2907	15/18866	9.96616e-05	0.00216598	0.00176207	27141/83874/572/8772/26999/444/29108/58484/5641	9
BP	GO:2000514	regulation of CD4-positive, alpha-beta T cell activation	22/2907	63/18866	0.000105927	0.00229411	0.0018663	5590/3566/604/5914/1604/654346/3142/975/64115/4092/30009/246778/80149/29126/8651/3594/284194/3965/2625/6375/51043/3458	22
BP	GO:0009150	purine ribonucleotide metabolic process	90/2907	401/18866	0.000110064	0.00236678	0.00192542	11277/6818/65018/445329/84649/4831/55229/2987/5223/203/10476/7114/6901/137964/4598/5210/518/226/10005/60490/5571/2180/196883/572/230/8942/23597/5213/9605/4597/6817/2584/201163/2954/5209/3155/2027/56848/8459/80025/51548/5138/539/10201/9551/8694/440672/4354/65990/11163/23305/3101/5208/120892/2181/8573/9524/5164/8460/8021/9567/516/514/5141/669/122622/521/513/9759/2026/80221/5236/3614/54541/4832/2647…	90
BP	GO:0031663	lipopolysaccharide-mediated signaling pathway	21/2907	59/18866	0.000110407	0.00236678	0.00192542	5595/114769/1604/4795/11027/923/3661/207/3055/4057/671/929/4282/59307/6348/6352/23643/388325/7001/7097/7099	21
BP	GO:0097193	intrinsic apoptotic signaling pathway	69/2907	290/18866	0.000110645	0.00236678	0.00192542	56616/7494/27141/51079/8428/23604/6648/8678/65018/1396/4318/84334/1032/27113/837/6794/27429/572/637/842/201163/602/5414/3303/11035/23378/8996/23368/10494/51246/3932/58515/3162/1051/2907/5598/79156/1191/6280/5329/581/120892/598/5423/51024/5164/2081/5883/207/597/10018/100133941/6423/8531/4282/10625/6279/29108/9709/8452/54541/7133/26471/2272/8876/1545/1649/7314/3315	69
BP	GO:0002369	T cell cytokine production	17/2907	43/18866	0.000111193	0.00236678	0.00192542	3134/8807/6556/5590/383/567/1604/3554/8809/975/4092/30009/3105/7133/2625/6375/1178	17
BP	GO:0002823	negative regulation of adaptive immune response based on somatic recombination of immune receptors built from immunoglobulin superfamily domains	17/2907	43/18866	0.000111193	0.00236678	0.00192542	3134/2213/634/3566/383/604/1378/4092/30009/80149/10859/722/6375/51043/84868/3575/9173	17
BP	GO:0032720	negative regulation of tumor necrosis factor production	20/2907	55/18866	0.000113639	0.00241054	0.00196103	27202/5004/409/54/5914/4795/4157/64115/6504/80149/671/50856/706/3586/5443/3965/10457/84868/23547/7099	20
BP	GO:0060048	cardiac muscle contraction	39/2907	140/18866	0.000114614	0.00242293	0.0019711	51130/6901/5566/7168/6717/5606/4635/29098/23327/6324/801/2281/274/5608/7136/4607/2946/79041/5025/4092/3753/6546/80149/9759/7134/3759/7139/5997/4633/3784/2258/1824/102723475/4625/8557/4634/4632/2548/7135	39
BP	GO:0043277	apoptotic cell clearance	19/2907	51/18866	0.000115182	0.00242665	0.00197413	11277/23210/720/721/5914/55113/10347/81567/8685/2219/399/718/7052/7305/4240/717/3690/7057/4035	19
BP	GO:0022900	electron transport chain	48/2907	184/18866	0.000120323	0.00252637	0.00205525	126328/4704/4701/6391/51079/374291/2109/65018/4714/4696/5447/4729/217/653361/54949/23479/112812/6901/4835/4708/4728/1327/637/2745/4718/1337/6389/7264/4204/314/6622/79689/10975/1528/6715/1535/6834/4707/4695/4688/9167/444/231/9249/51218/84419/1588/1339	48
BP	GO:0003012	muscle system process	102/2907	467/18866	0.000121273	0.00253772	0.00206449	51130/8837/6901/5566/5300/7168/6717/226/5606/1760/114907/4635/5829/2931/29098/1613/10398/4637/2017/23327/6324/801/2281/8877/274/5608/6535/3693/7136/8291/1264/8398/4607/3162/2946/10627/1410/3600/9150/79041/1535/4636/9732/5025/72/1145/4092/3753/6546/23125/1674/80149/7111/18/126306/60675/9172/9759/4638/7134/444/3759/7139/5348/7138/4151/113246/5997/7140/4633/3784/7133/2258/2539/59/4703/3778/2934/5595…	102
BP	GO:0002724	regulation of T cell cytokine production	14/2907	32/18866	0.000123257	0.00256192	0.00208418	3134/5590/383/567/3554/8809/975/4092/30009/3105/7133/2625/6375/1178	14
BP	GO:0042744	hydrogen peroxide catabolic process	14/2907	32/18866	0.000123257	0.00256192	0.00208418	3039/3040/3043/3240/3049/3042/2878/3048/6622/4504/3050/3047/7001/3045	14
BP	GO:0042176	regulation of protein catabolic process	89/2907	397/18866	0.000124993	0.00258932	0.00210647	112398/54971/11267/51079/5700/51009/3300/1453/55743/65018/4946/22933/1595/11345/9683/79016/5566/56658/5300/406/51160/10273/4947/9146/10459/8742/11060/2931/3303/9810/26088/79888/9554/23327/51548/10755/51035/8291/2629/6622/3084/83547/4287/2534/101/150684/25820/1191/84300/120892/10533/7480/23192/6642/975/4092/1263/6386/302/9491/1075/207/3304/7078/2670/51343/9709/3586/5728/28951/90637/7133/26471/5721…	89
BP	GO:0002758	innate immune response-activating signal transduction	34/2907	117/18866	0.000125628	0.00259379	0.0021101	8517/5715/6500/5700/5719/2867/5683/3385/5687/5698/5566/5336/22914/26253/5699/3384/11027/2534/5710/5971/5894/200958/2219/9491/3055/9861/2207/100528032/338339/50856/5721/5058/10462/84433	34
BP	GO:0050671	positive regulation of lymphocyte proliferation	38/2907	136/18866	0.000130054	0.00267626	0.00217719	2323/604/1604/283234/23308/58515/54106/8772/958/3600/10288/3280/923/683/975/29126/916/100133941/115352/7535/4282/3594/51293/3105/29108/115650/959/3965/940/6352/6375/84868/11151/57162/7293/84433/3109/7099	38
BP	GO:0007229	integrin-mediated signaling pathway	32/2907	108/18866	0.000131491	0.00269687	0.00219396	3611/27040/4831/4739/9270/57126/55679/634/2039/83605/3693/967/3682/3687/683/3055/2207/2268/7305/8452/3679/959/8482/3684/9636/8754/3674/2335/3690/3695/7076/3689	32
BP	GO:0034340	response to type I interferon	30/2907	99/18866	0.000134979	0.00275928	0.00224473	11277/3669/10379/3134/10581/81030/4600/2634/8519/6672/8638/7297/3659/3106/10410/84166/55337/8772/3661/3429/3107/4938/3665/4599/3105/3430/3433/9636/3434/3437	30
BP	GO:0045732	positive regulation of protein catabolic process	56/2907	225/18866	0.000136506	0.00278131	0.00226266	112398/11267/51079/5700/3300/1453/55743/4946/22933/79016/51160/10273/4947/8742/11060/2931/3303/9810/26088/79888/9554/23327/51548/2629/83547/4287/101/25820/1191/84300/120892/10533/23192/6642/975/4092/1263/1075/207/3304/51343/9709/5728/28951/90637/7133/26471/1027/255488/722/8754/20/149628/3458/348/4035	56
BP	GO:0070265	necrotic cell death	22/2907	64/18866	0.000138149	0.00280556	0.00228238	81030/8837/11035/23593/3705/353376/197259/8772/3661/581/291/6533/84266/8531/929/4504/356/706/5836/23643/57162/7099	22
BP	GO:1905475	regulation of protein localization to membrane	50/2907	195/18866	0.000139696	0.00282771	0.0023004	1201/51763/9482/5590/27113/8878/9528/9270/6810/208/285966/2039/572/6809/637/29098/56947/2664/23368/54550/3958/2534/11079/2064/3002/8650/2181/975/598/3753/5583/51024/4641/207/8851/2633/10490/5906/8766/1020/2934/55022/3684/26119/2852/8417/5058/3689/3458/4035	50
BP	GO:0071621	granulocyte chemotaxis	36/2907	127/18866	0.000140809	0.00284095	0.00231117	3577/23604/3579/27202/5595/120425/8291/3958/51192/2919/728/4354/6280/1441/6283/683/6351/5196/1803/9750/2207/1240/5197/6279/1236/6846/6358/6348/6352/6375/6288/7057/5473/3689/6349/719	36
BP	GO:0006959	humoral immune response	85/2907	377/18866	0.000143158	0.00287897	0.0023421	7942/8993/28639/6556/27202/2213/1667/728358/54210/3537/28893/60343/54145/3934/720/4049/5266/283/721/28921/602/5699/820/1604/8347/1668/2919/6590/8398/728/7030/715/1191/10578/6280/3848/1378/240/6283/683/388077/5199/975/28638/966/10417/5450/5196/2219/4057/671/8970/718/5197/1669/1379/931/6279/3105/713/28526/1236/6223/2625/5133/940/712/717/722/930/55600/28919/5320/5967/5225/714/5473/28473/11326/2208/3…	85
BP	GO:0061900	glial cell activation	21/2907	60/18866	0.000145422	0.00291502	0.00237143	135/10135/2358/8877/6622/728/1191/120892/25825/1075/4317/7305/3684/8530/712/6348/51311/3689/3458/7097/4035	21
BP	GO:0008360	regulation of cell shape	42/2907	156/18866	0.00014756	0.00294835	0.00239854	54509/23370/7168/226/2039/755/389/55843/1613/116985/6284/10458/10435/10507/89846/2534/23136/752/10602/2038/7940/3055/221472/51177/5362/64218/399/10154/2268/7422/3383/57471/56882/29780/121512/3679/3074/2335/6348/11151/3689/374872	42
BP	GO:0006919	activation of cysteine-type endopeptidase activity involved in apoptotic process	27/2907	86/18866	0.000149121	0.00295098	0.00240068	56616/8837/27113/1512/8717/572/637/842/8738/400410/112399/3932/6622/10016/8772/6280/581/9026/22861/26355/356/6279/29108/91662/58484/5468/8743	27
BP	GO:0070664	negative regulation of leukocyte proliferation	27/2907	86/18866	0.000149121	0.00295098	0.00240068	2213/8379/383/8764/640/11314/654346/1051/23495/2064/10288/64115/7940/10859/29126/56253/7305/284194/3586/3965/10457/6375/51043/84868/57162/11326/4332	27
BP	GO:1903901	negative regulation of viral life cycle	27/2907	86/18866	0.000149121	0.00295098	0.00240068	8812/3669/51763/10581/81559/200315/9218/8519/10318/60489/8638/5359/6590/10410/55337/51652/80149/2219/4057/4938/4599/84875/2934/9636/6352/9582/3434	27
BP	GO:0060337	type I interferon signaling pathway	29/2907	95/18866	0.000150243	0.00295431	0.00240339	11277/3669/10379/3134/10581/81030/4600/2634/8519/6672/8638/7297/3659/3106/10410/84166/8772/3661/3429/3107/4938/3665/4599/3105/3430/3433/9636/3434/3437	29
BP	GO:0071357	cellular response to type I interferon	29/2907	95/18866	0.000150243	0.00295431	0.00240339	11277/3669/10379/3134/10581/81030/4600/2634/8519/6672/8638/7297/3659/3106/10410/84166/8772/3661/3429/3107/4938/3665/4599/3105/3430/3433/9636/3434/3437	29
BP	GO:0032946	positive regulation of mononuclear cell proliferation	38/2907	137/18866	0.000153614	0.00301102	0.00244953	2323/604/1604/283234/23308/58515/54106/8772/958/3600/10288/3280/923/683/975/29126/916/100133941/115352/7535/4282/3594/51293/3105/29108/115650/959/3965/940/6352/6375/84868/11151/57162/7293/84433/3109/7099	38
BP	GO:0001912	positive regulation of leukocyte mediated cytotoxicity	19/2907	52/18866	0.000155498	0.00303835	0.00247176	3134/8807/22914/51571/383/567/3106/259197/8772/10666/56253/100528032/3594/3105/7305/3684/8417/3902/6375	19
BP	GO:0016241	regulation of macroautophagy	46/2907	176/18866	0.000157118	0.00306034	0.00248965	29082/8517/8897/1201/527/65018/9114/60673/5595/51382/5566/27429/389541/64121/5571/57535/90410/533/10542/155066/9554/10133/2629/529/535/3162/79142/28956/1634/120892/9638/2081/207/8851/4864/83667/526/1020/8131/5768/8408/26471/51100/9531/57533/5899	46
BP	GO:0031063	regulation of histone deacetylation	13/2907	29/18866	0.000159153	0.00308974	0.00251357	65018/10467/604/122953/56848/25865/26993/1487/120892/7422/6720/10474/51043	13
BP	GO:0002291	T cell activation via T cell receptor contact with antigen bound to MHC molecule on antigen presenting cell	7/2907	10/18866	0.000159625	0.00308974	0.00251357	3958/975/10859/3383/3965/84868/3109	7
BP	GO:0032388	positive regulation of intracellular transport	55/2907	222/18866	0.000176985	0.00341509	0.00277825	65018/5296/4946/11132/27113/10938/54828/5566/6794/27429/9270/208/4947/8536/285966/55072/572/53407/637/59286/23011/7323/5494/2931/118424/56947/23368/9520/8841/118426/2534/3305/22885/2064/3002/3059/9638/975/1263/51024/6342/80149/302/4641/8851/8692/1020/51100/3684/26119/9531/5058/3689/2010/3458	55
BP	GO:0098543	detection of other organism	10/2907	19/18866	0.000179062	0.00344436	0.00280205	8993/4671/3106/64581/64127/7096/3105/58484/7097/7099	10
BP	GO:0043367	CD4-positive, alpha-beta T cell differentiation	25/2907	78/18866	0.00017968	0.00344436	0.00280205	5590/3566/604/602/5914/3142/5971/8809/4063/51176/4092/30009/246778/80149/8651/64218/2529/10538/3594/1514/3965/2625/6095/51043/3458	25
BP	GO:0010822	positive regulation of mitochondrion organization	34/2907	119/18866	0.00018017	0.00344436	0.00280205	27141/65018/4318/27113/27429/55072/572/637/59286/7323/2931/118424/56947/23368/10133/9520/2629/8398/25793/3305/22885/3002/5329/1634/581/400916/51024/9026/10018/26355/29108/51100/2852/8743	34
BP	GO:0002478	antigen processing and presentation of exogenous peptide antigen	46/2907	177/18866	0.000181076	0.00345103	0.00280749	8517/10437/5715/3831/5700/5719/8907/11258/3134/653361/5683/5687/5698/2213/10540/1785/2210/2209/5699/567/9554/3693/3106/6890/83547/5710/1535/160/4688/1175/9491/3107/9861/2207/8773/50856/6891/3105/3112/1514/5721/5641/3902/4689/3117/3109	46
BP	GO:0051258	protein polymerization	70/2907	300/18866	0.000185229	0.00351935	0.00286307	29082/79585/653440/1453/374666/65018/81565/4600/24139/28988/27243/22924/10093/11078/7114/9051/1785/51571/2039/10092/6904/51734/23406/283/89848/29098/3303/7408/100287171/2017/274/10458/10435/4204/6622/375307/54820/2314/10602/51652/3059/51466/26999/9026/4641/3055/3304/7111/8851/55755/81873/10095/3383/4599/81553/342184/29108/1236/2258/6840/1027/2934/27338/1627/5058/6710/22921/10677/11151/822	70
BP	GO:0042267	natural killer cell mediated cytotoxicity	21/2907	61/18866	0.000189884	0.00359676	0.00292604	3134/8807/409/634/22914/9437/3106/259197/3002/10666/3805/10859/3811/56253/100528032/3105/3965/57823/3902/84868/11151	21
BP	GO:0031348	negative regulation of defense response	64/2907	269/18866	0.000192536	0.00363589	0.00295787	11277/2874/135/7353/6397/3134/5094/8993/22933/2213/2358/409/4598/60343/634/7850/284207/54/383/4210/171389/7130/26007/10162/3106/2629/388581/84166/5598/3848/5654/1378/56833/5467/240/3805/80149/10859/10906/89790/81858/79132/347/3105/29/29108/91662/3586/7133/6223/3965/2852/2625/8530/6095/9021/5468/6288/84868/1588/11326/313/2113/348	64
BP	GO:0006995	cellular response to nitrogen starvation	8/2907	13/18866	0.000195192	0.00364605	0.00296613	11337/8678/11345/23710/84557/643246/81631/10533	8
BP	GO:0043562	cellular response to nitrogen levels	8/2907	13/18866	0.000195192	0.00364605	0.00296613	11337/8678/11345/23710/84557/643246/81631/10533	8
BP	GO:2001198	regulation of dendritic cell differentiation	8/2907	13/18866	0.000195192	0.00364605	0.00296613	2213/3106/1051/10288/10859/55365/3965/28959	8
BP	GO:0034121	regulation of toll-like receptor signaling pathway	24/2907	74/18866	0.000196008	0.00364605	0.00296613	2874/409/10211/171389/4795/3659/11314/23098/353376/11027/54106/1535/4057/115352/3665/929/7096/7100/285852/23643/23547/57162/7097/7099	24
BP	GO:0045953	negative regulation of natural killer cell mediated cytotoxicity	9/2907	16/18866	0.000196606	0.00364605	0.00296613	3134/409/634/3106/3805/10859/3105/3965/84868	9
BP	GO:0051770	positive regulation of nitric-oxide synthase biosynthetic process	9/2907	16/18866	0.000196606	0.00364605	0.00296613	10135/5608/54106/120892/64127/2208/3458/7097/7099	9
BP	GO:0031667	response to nutrient levels	102/2907	473/18866	0.000200087	0.00369039	0.00300221	7494/968/11337/8897/133/8428/11152/8678/55062/5447/7378/7942/22933/249/10135/11345/5595/1032/5289/54828/26100/7392/64121/5571/23710/2180/3934/383/84557/8942/8932/1327/4049/2029/57535/55630/643246/81631/201163/8854/5914/81788/23378/4303/3155/2281/51548/4968/2629/3162/958/6715/3600/1535/5467/120892/10533/2181/6546/51024/5164/80149/916/207/27344/6423/53615/122622/3383/2350/83667/4504/64127/6720/8131…	102
BP	GO:0097242	amyloid-beta clearance	15/2907	37/18866	0.000200785	0.00369039	0.00300221	1595/4043/4311/728/1191/10347/8685/718/8766/4481/3684/3689/3458/348/4035	15
BP	GO:2000785	regulation of autophagosome assembly	15/2907	37/18866	0.000200785	0.00369039	0.00300221	29082/8897/65018/57535/90410/9554/79142/120892/9638/8131/8408/26471/51100/57533/5899	15
BP	GO:0000272	polysaccharide catabolic process	12/2907	26/18866	0.000202785	0.00371613	0.00302315	5261/79660/1118/8972/801/5837/5256/5236/5836/5509/2548/313	12
BP	GO:0043280	positive regulation of cysteine-type endopeptidase activity involved in apoptotic process	37/2907	134/18866	0.000205752	0.00375937	0.00305833	56616/51079/8837/27113/1512/27429/8717/572/637/842/8738/400410/112399/3932/6622/10016/8772/6280/581/51024/9026/10018/834/64581/22861/26355/356/6279/29108/91662/2934/3965/58484/2852/5468/55655/8743	37
BP	GO:0006937	regulation of muscle contraction	45/2907	173/18866	0.000207017	0.00377137	0.00306809	51130/5566/7168/6717/1760/29098/1613/10398/2017/801/2281/8877/274/7136/1264/4607/2946/79041/4636/9732/5025/4092/6546/80149/18/60675/9759/7134/3759/7139/7138/113246/5997/7140/4633/3784/2258/3778/2852/1824/126393/4625/7125/4634/7135	45
BP	GO:0043112	receptor metabolic process	50/2907	198/18866	0.00020849	0.00378707	0.00308086	3577/133/8678/55111/4600/3579/1889/4043/409/5336/10211/634/93343/1785/116985/10133/10330/54550/6622/967/3084/2966/27065/160/8650/6642/975/6386/10859/302/1175/2207/7422/4599/1020/84058/3586/11031/51100/26119/5641/20/43/5468/3690/3689/928/3458/348/4035	50
BP	GO:0032611	interleukin-1 beta production	31/2907	106/18866	0.000215619	0.0039051	0.00317688	5004/409/353514/54/79792/4210/114769/8877/11027/80149/834/64581/115362/22861/9447/64127/7305/29108/91662/1236/3965/58484/5005/6348/55655/149628/51311/4332/3458/3315/7099	31
BP	GO:0006119	oxidative phosphorylation	40/2907	149/18866	0.0002237	0.00403965	0.00328634	126328/4704/4701/6391/51079/374291/65018/4714/4696/4729/10476/54949/23479/6901/518/4708/4728/1327/637/4718/1337/539/6389/9551/4204/6622/10975/65990/84300/6834/400916/4707/4695/9167/516/514/521/513/26471/1339	40
BP	GO:0016575	histone deacetylation	25/2907	79/18866	0.000224845	0.00404852	0.00329355	65018/51547/22933/10467/25855/604/122953/83933/23410/79885/56848/51548/8841/25865/26993/4287/10943/1487/120892/7422/10014/9759/6720/10474/51043	25
BP	GO:0072659	protein localization to plasma membrane	66/2907	281/18866	0.000228447	0.00410144	0.00333661	1201/51130/51763/10139/9482/5590/10938/81619/8878/2580/9528/51304/9270/6810/208/90196/10211/582/6809/90410/29098/26088/5864/10133/3958/9914/353116/11079/10098/145567/79156/23136/64689/27065/8650/2181/975/598/26262/5583/8631/302/207/2207/2633/54997/54843/10490/5906/8766/1020/92162/2258/11031/55022/682/26119/2852/8417/10791/6521/6281/286/3458/2319/4035	66
BP	GO:0046365	monosaccharide catabolic process	22/2907	66/18866	0.000229521	0.00410377	0.0033385	5223/2582/226/132158/572/230/5213/2584/26007/2027/3101/5208/669/2529/2026/130589/51181/5236/8277/5224/216/229	22
BP	GO:1903008	organelle disassembly	32/2907	111/18866	0.000229901	0.00410377	0.0033385	11337/3831/11152/8678/65018/55062/65991/11345/26100/51368/8878/27429/79065/23710/84557/53918/643246/81631/2931/2017/9140/10133/285973/2629/25793/10533/1263/51024/6720/706/64422/23130	32
BP	GO:0090314	positive regulation of protein targeting to membrane	13/2907	30/18866	0.000241428	0.00429714	0.00349581	9270/208/285966/56947/2534/2064/51024/4641/8851/1020/3684/5058/3689	13
BP	GO:0002220	innate immune response activating cell surface receptor signaling pathway	33/2907	116/18866	0.000243052	0.00431365	0.00350924	8517/5715/6500/5700/5719/2867/5683/3385/5687/5698/5566/5336/22914/26253/5699/3384/11027/2534/5710/5971/5894/200958/2219/9491/9861/2207/100528032/338339/50856/5721/5058/10462/84433	33
BP	GO:0030888	regulation of B cell proliferation	21/2907	62/18866	0.000245882	0.00435141	0.00353996	2213/604/640/11314/933/54106/23495/958/683/975/115352/4282/51293/7305/3586/115650/57162/7293/84433/4332/7099	21
BP	GO:0032418	lysosome localization	24/2907	75/18866	0.000246623	0.00435208	0.00354051	27040/81565/6813/7942/79036/54785/54849/2647/9842/3566/65082/201163/640/56848/5864/11314/6284/118426/3162/2207/8773/2268/3965/23095	24
BP	GO:0009259	ribonucleotide metabolic process	91/2907	416/18866	0.000259535	0.00456693	0.00371529	11277/6818/65018/445329/7378/84649/4831/55229/2987/5223/203/10476/7114/6901/137964/4598/5210/518/226/10005/60490/5571/2180/196883/572/230/8942/23597/5213/9605/4597/6817/2584/201163/2954/5209/3155/2027/56848/8459/80025/51548/5138/539/10201/9551/8694/440672/4354/65990/11163/23305/3101/5208/120892/2181/8573/9524/5164/8460/8021/9567/516/514/5141/669/122622/521/513/9759/2026/80221/5236/3614/54541/4832…	91
BP	GO:0031638	zymogen activation	20/2907	58/18866	0.000261184	0.00458293	0.00372831	27141/83874/3240/1512/2678/572/7123/715/8772/2161/64115/26999/444/29108/55848/1514/58484/5641/7057/350	20
BP	GO:0030100	regulation of endocytosis	52/2907	210/18866	0.000265199	0.00464023	0.00377492	53916/1201/9094/60682/4043/409/51160/5336/57126/10211/1785/23011/567/23327/8877/11314/274/54550/3958/6622/967/933/1191/7251/6453/10347/160/8650/120892/9026/55738/6386/10859/302/1175/718/7422/79772/10188/929/55589/84058/11031/26119/977/20/5468/3690/341/345/348/4035	52
BP	GO:2000377	regulation of reactive oxygen species metabolic process	50/2907	200/18866	0.000270016	0.00471121	0.00383267	65018/22933/3043/3240/2358/8837/84334/440503/5547/4835/57126/22914/1785/54/11035/23410/56848/9263/6622/2534/1191/1410/1535/240/683/5025/80149/207/64581/11334/100528032/4317/3383/9759/4504/1647/706/7305/3586/2539/573971/23564/55022/3684/7057/1545/3689/7001/3458/7099	50
BP	GO:0019058	viral life cycle	77/2907	341/18866	0.000273037	0.00473781	0.00385431	29082/8812/11267/3669/339122/51763/10581/5094/27243/81559/28972/9217/200315/7311/9218/51160/10450/8519/10318/93343/53840/7316/60489/11060/8638/8764/9798/10542/3303/23327/79720/1604/5359/3693/6590/10410/6993/1487/55337/7251/5091/1378/51652/9080/975/3429/6504/80149/2219/1803/3304/4057/8021/10572/8692/4938/3383/10663/4599/4864/1514/84875/2934/1508/3965/9636/940/6352/4684/3690/3695/290/9582/7293/3434…	77
BP	GO:0030308	negative regulation of cell growth	48/2907	190/18866	0.00027307	0.00473781	0.00385431	51079/3300/1032/29946/322/3621/6794/29948/604/201163/2931/10509/3303/400410/56848/10201/978/10507/3475/7869/1410/9150/5467/203245/323/51094/10668/64218/3304/6423/8851/8692/10501/83667/4504/1020/5997/4633/2258/2539/1027/8482/5058/5468/5795/64061/2203/6696	48
BP	GO:0001774	microglial cell activation	18/2907	50/18866	0.000285078	0.00490492	0.00399026	10135/2358/8877/6622/728/1191/120892/1075/4317/7305/3684/8530/712/6348/51311/3689/3458/7097	18
BP	GO:0002269	leukocyte activation involved in inflammatory response	18/2907	50/18866	0.000285078	0.00490492	0.00399026	10135/2358/8877/6622/728/1191/120892/1075/4317/7305/3684/8530/712/6348/51311/3689/3458/7097	18
BP	GO:0097300	programmed necrotic cell death	18/2907	50/18866	0.000285078	0.00490492	0.00399026	81030/8837/11035/3705/353376/197259/8772/3661/581/291/84266/8531/929/356/5836/23643/57162/7099	18
BP	GO:0031334	positive regulation of protein-containing complex assembly	61/2907	257/18866	0.000287089	0.00492584	0.00400727	653440/374666/65018/2073/2968/205251/10093/10273/5526/10092/5908/637/389/89848/3303/7408/100287171/2017/274/10458/10435/129293/81857/3958/4204/6622/3084/2966/7013/1191/10602/581/7480/51466/9026/8631/6119/4641/10018/3055/8115/3304/8851/64581/55755/81873/10095/7422/3383/115362/342184/29108/1236/1027/2934/51100/6886/5058/11151/3458/7099	61
BP	GO:0031669	cellular response to nutrient levels	54/2907	221/18866	0.00029217	0.00499917	0.00406693	7494/968/11337/8897/8428/11152/8678/55062/7378/7942/10135/11345/5595/5289/26100/7392/64121/5571/23710/3934/84557/57535/55630/643246/81631/201163/81788/23378/2629/3162/6715/3600/120892/10533/5164/80149/3383/2350/83667/6720/8131/10634/8408/7421/6513/51100/1824/5468/213/2752/5899/360/5166/102724428	54
BP	GO:0032386	regulation of intracellular transport	80/2907	358/18866	0.000297261	0.00506495	0.00412044	51009/51763/65018/5296/81565/51547/5936/4600/4946/5595/11132/27113/10938/54828/5566/6794/27429/9270/5605/208/4947/8536/285966/6672/55072/2039/572/53407/637/59286/23011/7323/5494/2931/118424/56947/2664/23368/9520/8841/118426/26993/4607/2534/3305/65990/22885/2064/3002/1410/51652/120892/3059/9638/975/1263/3753/51024/3429/6342/80149/302/4641/8851/8021/8692/347/7134/6720/1020/404636/51100/3684/26119/9…	80
BP	GO:0006066	alcohol metabolic process	85/2907	385/18866	0.00029765	0.00506495	0.00412044	6818/51763/445329/5447/2710/84649/217/51478/10948/64768/1595/147015/6256/5333/4598/5336/5959/55825/10901/4802/4597/6817/2584/8854/26007/2224/2053/801/56848/151056/8877/10162/79153/64788/3705/27122/8291/4204/2629/6622/8694/23780/440672/3632/11163/5467/10577/9651/1593/5335/6609/113026/9619/1645/4864/4504/6720/231/1066/80271/8818/125/10682/5728/2539/7421/573971/55911/26119/9249/2852/20/3613/10170/59…	85
BP	GO:0002689	negative regulation of leukocyte chemotaxis	10/2907	20/18866	0.00030875	0.00523945	0.0042624	1652/27202/22914/11240/56833/4681/1803/100528032/4282/1588	10
BP	GO:0010876	lipid localization	95/2907	440/18866	0.000310994	0.00524572	0.0042675	57048/2874/9885/1201/83985/80765/10809/2867/1375/84649/10948/28232/26207/366/440503/10938/27166/6256/51099/26580/140606/208/634/2180/9399/57655/8714/9854/200931/80820/55113/80148/10162/5608/5359/10998/8291/8694/8398/23780/26020/1191/11000/10347/5467/10577/5025/2181/80833/6342/80149/338440/161247/302/207/58488/23762/8605/84266/718/9619/1645/347/56729/4282/4864/1066/4481/706/5443/6513/55911/26119/2…	95
BP	GO:0022408	negative regulation of cell-cell adhesion	48/2907	191/18866	0.000311101	0.00524572	0.0042675	135/2213/4155/3557/8379/634/10459/3566/383/604/8764/3659/11314/654346/3958/3142/1051/5598/2064/10288/84830/64115/4092/201633/30009/80149/10859/29126/207/1840/8651/9750/18/56253/7422/10653/284194/3586/3965/10457/3902/6375/51043/84868/57162/928/11326/7001	48
BP	GO:2001242	regulation of intrinsic apoptotic signaling pathway	43/2907	166/18866	0.00031166	0.00524572	0.0042675	7494/51079/23604/6648/8678/65018/4318/1032/27113/27429/572/637/201163/5414/3303/11035/8996/3932/2907/5598/79156/1191/6280/5329/581/120892/598/51024/5883/207/10018/6423/8531/4282/10625/6279/29108/9709/26471/8876/1649/7314/3315	43
BP	GO:0036037	CD8-positive, alpha-beta T cell activation	12/2907	27/18866	0.000314057	0.00527173	0.00428866	3659/64115/10859/29126/8651/56253/50856/3105/8320/944/6375/51043	12
BP	GO:0051817	modulation of process of other organism involved in symbiotic interaction	29/2907	99/18866	0.000329182	0.00551068	0.00448305	8812/51763/1667/9217/728358/6256/9218/10318/572/1072/3482/5091/9150/10910/10533/51176/598/3429/6351/80149/302/10018/4057/8692/8408/6348/6352/358/348	29
BP	GO:0002440	production of molecular mediator of immune response	70/2907	306/18866	0.000341722	0.00570519	0.00464129	7494/11277/3134/2867/729453/8807/6556/2213/5590/28893/6810/10459/3566/383/604/8764/28921/567/1604/56848/27343/8741/10312/3554/3162/933/8809/54106/958/10666/149840/975/2865/5423/4092/10417/30009/3805/10859/2207/115352/29802/10538/28677/4282/28942/64127/28691/3105/3586/7133/959/28664/8482/28669/2625/940/28919/6375/5950/5225/28518/3575/388325/7293/84433/7097/336/7099/1178	70
BP	GO:0006979	response to oxidative stress	98/2907	458/18866	0.000351639	0.00585498	0.00476315	56616/3039/11277/8428/5603/6648/3040/65018/4318/4831/22933/653361/8807/3043/140809/475/3240/8837/3163/84334/5595/4482/7168/406/10587/27429/6810/55139/3934/1785/572/383/4728/84557/5829/59338/116988/3303/11035/8996/23410/2878/2281/8877/4968/11284/10494/79661/6622/58515/25793/2534/3162/10636/5598/3848/1410/1535/240/26034/120892/10533/1263/6546/5798/5164/80149/4688/8309/207/3304/2034/8692/79772/347/9…	98
BP	GO:0062197	cellular response to chemical stress	80/2907	360/18866	0.000356828	0.00592048	0.00481644	56616/11277/8428/1201/5603/6648/65018/825/4318/4831/22933/653361/8807/140809/8837/5595/4482/7168/406/10587/27429/6810/55139/3934/1785/572/383/84557/5829/59338/116988/3303/11035/8996/23410/2878/8877/10494/8291/6622/25793/2534/3162/5971/5598/1535/240/120892/10533/677/5164/80149/4688/207/3304/2034/8531/4638/83667/4504/231/9973/706/3586/2539/573971/6513/8876/5468/4689/358/1545/51314/1649/1471/2113/70…	80
BP	GO:2000515	negative regulation of CD4-positive, alpha-beta T cell activation	13/2907	31/18866	0.000357485	0.00592048	0.00481644	3566/604/654346/3142/64115/4092/30009/80149/29126/284194/3965/6375/51043	13
BP	GO:0051452	intracellular pH reduction	19/2907	55/18866	0.000359551	0.00593882	0.00483135	1201/527/9114/6556/147007/653519/51463/51382/533/155066/55647/10312/529/535/1203/56833/79641/526/356	19
BP	GO:0002716	negative regulation of natural killer cell mediated immunity	9/2907	17/18866	0.000360687	0.00594175	0.00483373	3134/409/634/3106/3805/10859/3105/3965/84868	9
BP	GO:0005996	monosaccharide metabolic process	68/2907	296/18866	0.000363149	0.00596643	0.00485381	5372/51763/10296/51547/84649/5223/5261/60343/5210/79660/208/2582/226/132158/572/55277/51363/230/1390/5213/80183/2584/2931/7086/5209/26007/2027/5373/388581/4351/1528/6515/7033/5091/3101/5467/5208/4485/51094/5164/23275/207/669/4938/2529/2026/347/83667/231/130589/51181/5236/5443/2539/8277/57001/6513/23178/4123/6095/5224/5509/5950/2203/5166/2548/216/229	68
BP	GO:0045926	negative regulation of growth	60/2907	254/18866	0.000366065	0.00599842	0.00487984	51079/3300/1032/29946/322/3621/6794/29948/604/201163/2931/4501/10509/3303/400410/56848/4494/10201/978/10507/3475/7869/1410/9150/6788/5467/203245/323/51094/55841/10668/64218/3304/6423/8851/8692/10501/83667/4504/1020/4502/5997/4633/5728/2258/2539/1027/8482/5641/5058/4493/9518/5468/5795/5950/64061/2203/6696/4495/247	60
BP	GO:0016485	protein processing	54/2907	223/18866	0.000370386	0.00605323	0.00492443	27141/1201/83874/9789/55851/3240/28972/1889/9159/5289/5566/1512/9528/27429/4311/2678/7850/572/29100/81502/6687/114769/8996/90701/831/10162/7123/715/101/151516/1203/8772/120892/2161/64115/26999/25825/5046/27344/834/23478/444/1066/29108/55848/1514/2934/83464/58484/8530/5641/7057/350/9509	54
BP	GO:0051712	positive regulation of killing of cells of other organism	7/2907	11/18866	0.000380345	0.00619963	0.00504353	572/383/10018/64581/5551/2208/3458	7
BP	GO:0150076	neuroinflammatory response	24/2907	77/18866	0.000383449	0.00623382	0.00507134	135/4318/10135/2358/8877/6622/728/1191/120892/25825/1075/4317/7305/7133/26471/3684/8530/712/6348/51311/3689/3458/7097/4035	24
BP	GO:0001914	regulation of T cell mediated cytotoxicity	14/2907	35/18866	0.000384529	0.00623501	0.00507231	3134/2213/634/51571/567/11035/3106/8772/10859/3594/3105/8417/6375/3575	14
BP	GO:0043300	regulation of leukocyte degranulation	17/2907	47/18866	0.000391507	0.00633157	0.00515087	3134/6813/2213/6810/57126/634/3566/640/56848/11314/3162/2207/2268/29/3684/3965/3689	17
BP	GO:0060135	maternal process involved in female pregnancy	21/2907	64/18866	0.000402649	0.00643794	0.0052374	5595/6256/383/8398/23780/5467/639/5066/207/231/23641/2057/5997/7421/1508/682/3965/84868/6696/10661/3976	21
BP	GO:2000401	regulation of lymphocyte migration	21/2907	64/18866	0.000402649	0.00643794	0.0052374	22914/11240/8740/8764/11035/58515/101/8772/80024/84830/6351/207/9750/6793/100528032/347/29108/6846/6348/6352/6375	21
BP	GO:0031342	negative regulation of cell killing	11/2907	24/18866	0.000403281	0.00643794	0.0052374	3134/2213/409/634/3106/3805/10859/3105/3965/84868/3575	11
BP	GO:0044247	cellular polysaccharide catabolic process	11/2907	24/18866	0.000403281	0.00643794	0.0052374	5261/79660/8972/801/5837/5256/5236/5836/5509/2548/313	11
BP	GO:0046835	carbohydrate phosphorylation	11/2907	24/18866	0.000403281	0.00643794	0.0052374	64768/55577/5210/55277/2584/5209/26007/197258/3705/3101/5208	11
BP	GO:1902106	negative regulation of leukocyte differentiation	30/2907	105/18866	0.000420212	0.00669098	0.00544325	11025/4831/8993/2213/56834/634/3566/604/5914/3659/25793/3142/2064/11006/4092/30009/80149/10859/1840/8651/4057/55365/3902/6348/51043/714/28959/7001/7099/9935	30
BP	GO:0042093	T-helper cell differentiation	20/2907	60/18866	0.000435048	0.00690946	0.00562099	5590/3566/604/602/5914/3142/5971/8809/4063/51176/4092/30009/246778/80149/64218/10538/3594/2625/6095/51043	20
BP	GO:0002821	positive regulation of adaptive immune response	31/2907	110/18866	0.000441742	0.00699782	0.00569287	3134/6556/5590/10459/51571/4049/567/8741/3106/3554/3142/8809/8772/958/10666/149840/975/30009/8631/29126/2207/718/3594/3105/29108/115650/8417/2625/940/6375/2208	31
BP	GO:0048002	antigen processing and presentation of peptide antigen	48/2907	194/18866	0.000455366	0.00719524	0.00585348	8517/10437/5715/3831/5700/5719/8907/11258/3134/653361/5683/6556/5687/5698/2213/10540/1785/2210/2209/5699/567/9554/3693/3106/6890/83547/5710/1535/160/4688/1175/9491/3107/9861/2207/8773/50856/6891/3105/29108/3112/1514/5721/5641/3902/4689/3117/3109	48
BP	GO:0043620	regulation of DNA-templated transcription in response to stress	32/2907	115/18866	0.000460912	0.00726435	0.0059097	112398/5715/5700/5719/22933/5683/5687/5698/7311/7316/6921/5699/3303/112399/5710/3162/10636/1051/5598/9491/9861/6195/2034/7422/83667/4504/5721/6923/9531/3337/1649/7314	32
BP	GO:0050854	regulation of antigen receptor-mediated signaling pathway	22/2907	69/18866	0.000465484	0.00730975	0.00594664	2874/2213/634/79037/640/11314/25865/3958/3932/933/10666/11006/975/5583/115352/2633/53347/1236/930/5795/150372/84433	22
BP	GO:0009144	purine nucleoside triphosphate metabolic process	26/2907	87/18866	0.000466153	0.00730975	0.00594664	65018/4831/2987/10476/7114/6901/518/226/9605/201163/56848/539/10201/9551/65990/120892/9567/516/514/521/513/3614/4832/55022/131870/168537	26
BP	GO:0061025	membrane fusion	43/2907	169/18866	0.000470215	0.00735483	0.0059833	1201/9570/4600/9482/8775/147650/9218/6810/208/116841/1785/6809/53407/2352/80183/55968/6804/9554/55647/5864/8877/8291/6622/6890/8677/64601/51652/23355/302/84286/25801/8773/8692/10490/4599/2350/6891/137886/1514/8417/135927/11151/928	43
BP	GO:2001238	positive regulation of extrinsic apoptotic signaling pathway	18/2907	52/18866	0.00049541	0.0077294	0.00628803	162989/27429/51330/8742/637/1613/4118/8772/6788/4055/7078/8692/50486/29108/5728/2852/7057/8743	18
BP	GO:0044262	cellular carbohydrate metabolic process	67/2907	294/18866	0.000504578	0.00785266	0.0063883	8509/51763/10296/2710/51547/84649/64768/5223/5261/2131/55577/60343/5210/79660/208/572/55277/80183/2584/8972/2931/5209/26007/197258/801/51548/3705/8291/4204/6622/388581/3632/5504/7033/3101/5208/5837/4485/51094/2992/5164/374907/207/83931/9759/83667/231/5256/5236/54541/5443/5728/26471/57001/6513/2852/23178/55790/5836/6095/3613/5509/2203/6521/5166/2548/313	67
BP	GO:0009206	purine ribonucleoside triphosphate biosynthetic process	21/2907	65/18866	0.00050951	0.00790954	0.00643457	65018/4831/10476/7114/6901/518/226/9605/201163/56848/539/10201/9551/65990/516/514/521/513/3614/4832/55022	21
BP	GO:0042157	lipoprotein metabolic process	36/2907	135/18866	0.000514888	0.00797304	0.00648624	11152/65258/55062/84649/84243/81926/5289/26100/5279/51304/51227/5494/5283/9140/100996939/2629/23780/58515/131540/10533/80833/64840/54344/347/8818/9091/84885/7357/3690/4973/2752/341/345/348/4035/336	36
BP	GO:0035456	response to interferon-beta	13/2907	32/18866	0.000517746	0.0079973	0.00650597	11277/51079/10581/997/8519/27429/3659/5359/10410/55337/9447/149628/4332	13
BP	GO:0090382	phagosome maturation	17/2907	48/18866	0.000520067	0.00801316	0.00651888	339122/1201/527/9114/51382/57192/533/155066/55647/10312/529/535/56833/84286/526/11031/11151	17
BP	GO:0019884	antigen processing and presentation of exogenous antigen	46/2907	185/18866	0.00052675	0.00809601	0.00658627	8517/10437/5715/3831/5700/5719/8907/11258/3134/653361/5683/5687/5698/2213/10540/1785/2210/2209/5699/567/9554/3693/3106/6890/83547/5710/1535/160/4688/1175/9491/3107/9861/2207/8773/50856/6891/3105/3112/1514/5721/5641/3902/4689/3117/3109	46
BP	GO:0070665	positive regulation of leukocyte proliferation	39/2907	150/18866	0.000534065	0.00818811	0.0066612	5595/2323/604/1604/283234/23308/58515/54106/8772/958/3600/10288/3280/923/683/975/29126/916/100133941/115352/7535/4282/3594/51293/3105/29108/115650/959/3965/940/6352/6375/84868/11151/57162/7293/84433/3109/7099	39
BP	GO:0042100	B cell proliferation	28/2907	97/18866	0.000537185	0.00820745	0.00667693	2213/604/640/11314/933/54106/23495/958/581/683/975/51176/115352/931/4282/51293/7305/3586/115650/959/973/930/3575/57162/7293/84433/4332/7099	28
BP	GO:0042088	T-helper 1 type immune response	16/2907	44/18866	0.000537976	0.00820745	0.00667693	8807/6556/3566/602/3554/3142/5971/8809/51176/246778/64218/3594/6375/84868/9173/7099	16
BP	GO:0006650	glycerophospholipid metabolic process	76/2907	343/18866	0.000540213	0.00820986	0.00667889	7920/57048/1120/8897/1201/65258/51763/1460/5296/10809/100137049/162466/2358/6901/5289/51099/5279/137964/255043/5336/1606/51227/5338/51205/59338/5283/56994/9489/79888/660/100996939/57153/151056/10162/129642/79153/5359/23533/4204/375133/8398/10908/5833/79887/3632/145567/11145/9651/64419/2181/5130/10423/55529/55361/58488/8651/8605/5920/54344/7941/10903/347735/80271/8818/5728/79143/9091/84803/728233/…	76
BP	GO:0046916	cellular transition metal ion homeostasis	32/2907	116/18866	0.000543906	0.00820986	0.00667889	6500/654483/4738/2495/9114/552900/6556/475/147007/3163/23479/6717/2512/3934/10058/55630/1318/4501/113235/4494/3932/3162/6280/4057/212/91252/4504/4502/6279/4493/4495/3458	32
BP	GO:0051651	maintenance of location in cell	52/2907	216/18866	0.000544588	0.00820986	0.00667889	6500/23345/2495/65018/825/54923/205251/23568/7114/5566/6717/5336/2512/6672/3934/57192/602/8996/801/2281/3932/6622/11079/2946/6280/79041/1535/581/80024/400916/6546/207/5335/126306/1020/55636/356/6279/706/1236/2934/1627/2852/255231/930/6348/6375/213/11151/1649/2548/348	52
BP	GO:1903320	regulation of protein modification by small protein conjugation or removal	57/2907	242/18866	0.000545687	0.00820986	0.00667889	2874/6500/3300/55743/65018/51547/825/51256/150678/9683/5300/8878/409/51160/10273/10318/10459/2931/7329/5414/3303/54472/9810/100287171/8877/8841/51035/83593/55611/8291/10016/2534/26232/150684/79142/64689/120892/4092/80149/207/3304/374969/9759/64127/1020/10625/706/51343/9709/8452/5728/84875/27338/9636/7321/57162/7314	57
BP	GO:0019068	virion assembly	15/2907	40/18866	0.000546087	0.00820986	0.00667889	29082/11267/339122/27243/28972/7311/51160/93343/7316/79720/7251/5091/51652/7314/348	15
BP	GO:0097352	autophagosome maturation	15/2907	40/18866	0.000546087	0.00820986	0.00667889	11337/1201/11345/25851/23710/84557/80183/643246/81631/65082/57192/79142/7251/64601/51652	15
BP	GO:1902041	regulation of extrinsic apoptotic signaling pathway via death domain receptors	20/2907	61/18866	0.000554641	0.00831827	0.00676708	8837/117584/6810/85450/8717/6672/4118/3958/3162/8772/6788/5894/598/6423/7078/3383/356/5728/7057/8743	20
BP	GO:1903829	positive regulation of cellular protein localization	75/2907	338/18866	0.0005601	0.00837986	0.00681719	1201/65018/5296/4946/51112/27113/81926/54828/5566/8878/51160/6794/27429/9270/6810/208/4947/8536/285966/55072/572/6809/637/59286/7323/5494/2931/10542/29098/118424/919/56947/23368/9520/8841/50855/54550/3958/9696/2534/11079/3305/22885/7251/2064/3002/10347/3059/2181/975/1263/5583/51024/80149/4641/207/8851/2207/8692/83666/8766/83667/1020/7305/51100/3684/9531/2852/5058/149628/3689/2010/3458/3976/4035	75
BP	GO:0006163	purine nucleotide metabolic process	94/2907	442/18866	0.000567595	0.00847153	0.00689177	11277/6818/65018/445329/84649/4831/55229/2987/5223/203/10476/7114/6901/5635/137964/4598/5210/518/226/10005/60490/5571/2180/196883/572/230/8942/23597/5213/9605/4597/6817/2584/201163/2954/5209/3155/2027/56848/8459/80025/51548/5138/539/10201/9551/8694/440672/4354/65990/11163/23305/3101/5208/120892/2181/2766/8573/9524/5164/8460/8021/9567/516/514/30833/5141/669/122622/521/513/9759/2026/80221/5236/3614…	94
BP	GO:0031668	cellular response to extracellular stimulus	59/2907	253/18866	0.000576763	0.00858767	0.00698624	7494/968/11337/8897/8428/11152/8678/55062/7378/7942/10135/11345/5595/432/5289/26100/7392/64121/5571/23710/3934/84557/57535/55630/643246/79792/81631/201163/81788/23378/2629/3162/6715/3600/120892/10533/875/5164/80149/6423/3383/2350/83667/6720/8131/10634/166/8408/7421/6513/51100/1824/5468/213/2752/5899/360/5166/102724428	59
BP	GO:0009205	purine ribonucleoside triphosphate metabolic process	24/2907	79/18866	0.000582742	0.00865589	0.00704174	65018/4831/10476/7114/6901/518/226/9605/201163/56848/539/10201/9551/65990/120892/9567/516/514/521/513/3614/4832/55022/168537	24
BP	GO:1905517	macrophage migration	19/2907	57/18866	0.000599782	0.00888768	0.00723031	1652/5595/3958/51192/728/56833/5025/975/4485/1240/4282/255231/6348/6352/6288/7057/1588/928/719	19
BP	GO:2001185	regulation of CD8-positive, alpha-beta T cell activation	9/2907	18/18866	0.000622967	0.00918869	0.00747519	3659/64115/10859/29126/8651/56253/3105/6375/51043	9
BP	GO:0051701	interaction with host	51/2907	212/18866	0.000623063	0.00918869	0.00747519	10581/27243/81559/84321/1667/9217/728358/6256/9218/8519/10318/53840/572/11060/8563/8764/9798/3303/79720/1604/3693/10410/6993/7251/5091/1378/51652/10533/9080/975/598/6504/2219/1803/10018/3304/10572/8692/3383/4864/1514/8408/2934/1508/3965/4684/3690/3695/290/7293/3434	51
BP	GO:0009145	purine nucleoside triphosphate biosynthetic process	21/2907	66/18866	0.000640172	0.00941858	0.00766221	65018/4831/10476/7114/6901/518/226/9605/201163/56848/539/10201/9551/65990/516/514/521/513/3614/4832/55022	21
BP	GO:0006644	phospholipid metabolic process	96/2907	455/18866	0.000658531	0.00966573	0.00786327	7920/57048/1120/8897/1201/65258/51763/1460/5296/10809/100137049/162466/2358/6901/5289/51099/5279/137964/5333/4598/255043/5336/1606/51227/5338/51205/4597/59338/5283/64748/56994/100287171/9489/79888/2224/660/100996939/57153/56848/151056/10162/129642/79153/5359/23533/4204/375133/8398/10908/5833/79887/3632/145567/5467/11145/9651/64419/2181/975/5130/10423/55529/55361/161247/58488/5335/8651/6609/8605/1…	96
BP	GO:1905477	positive regulation of protein localization to membrane	34/2907	127/18866	0.000672019	0.00984039	0.00800536	1201/27113/8878/9270/6810/208/285966/572/6809/637/29098/56947/23368/54550/3958/2534/11079/2064/3002/2181/975/5583/51024/4641/207/8851/8766/1020/3684/2852/5058/3689/3458/4035	34
BP	GO:0070498	interleukin-1-mediated signaling pathway	29/2907	103/18866	0.000675759	0.00987182	0.00803093	8517/5715/6500/5700/5719/7335/81030/5683/5687/5698/5595/7311/8878/3557/7850/7316/5699/54472/3554/5710/9491/9861/79155/246330/64127/5721/3556/57162/7314	29
BP	GO:0002686	negative regulation of leukocyte migration	17/2907	49/18866	0.000683291	0.00992091	0.00807086	1652/27202/22914/11240/11314/3162/56833/84830/4681/1803/207/9750/100528032/347/4282/29/1588	17
BP	GO:2000107	negative regulation of leukocyte apoptotic process	17/2907	49/18866	0.000683291	0.00992091	0.00807086	3579/604/171558/939/8772/3059/10859/57864/2207/3665/4282/64127/1236/6352/1942/3575/1831	17
BP	GO:0090316	positive regulation of intracellular protein transport	45/2907	182/18866	0.000683924	0.00992091	0.00807086	65018/5296/4946/27113/54828/5566/27429/9270/208/4947/8536/285966/55072/572/637/59286/7323/5494/2931/118424/56947/23368/9520/8841/2534/3305/22885/2064/3002/3059/975/1263/51024/80149/4641/8851/8692/1020/51100/3684/9531/5058/3689/2010/3458	45
BP	GO:0019730	antimicrobial humoral response	36/2907	137/18866	0.000692923	0.0100273	0.00815739	8993/6556/1667/728358/60343/54145/3934/5266/283/602/820/8347/1668/2919/6590/8398/1191/10578/6280/6283/10417/5196/4057/671/8970/5197/1669/6279/3105/6223/55600/5320/5967/5225/5473/5645	36
BP	GO:0061615	glycolytic process through fructose-6-phosphate	12/2907	29/18866	0.000694494	0.0100273	0.00815739	5223/226/230/5213/2584/2027/3101/669/2026/5224/6521/229	12
BP	GO:0050714	positive regulation of protein secretion	43/2907	172/18866	0.000697004	0.0100401	0.00816783	7494/5715/135/79971/11132/322/6717/6810/338442/572/26253/65220/283/9854/55691/23410/640/50855/8398/101/388581/5467/3661/5208/8938/18/9619/56253/2268/929/4282/3586/2852/8754/43/5950/6288/2752/7293/3458/7097/4035/7099	43
BP	GO:0002687	positive regulation of leukocyte migration	37/2907	142/18866	0.000699559	0.0100535	0.00817875	23604/3579/2358/5595/8740/8764/8291/3958/63940/728/58515/3554/101/8772/5025/6351/9750/1240/2529/7422/3383/7941/29108/1236/8784/3965/6846/83483/5641/6403/3674/6348/6352/6375/7057/1230/719	37
BP	GO:0045824	negative regulation of innate immune response	20/2907	62/18866	0.000701669	0.0100605	0.00818442	11277/3134/409/60343/634/383/3106/84166/1378/56833/3805/10859/10906/79132/3105/6223/3965/5468/84868/11326	20
BP	GO:0019932	second-messenger-mediated signaling	96/2907	456/18866	0.000710369	0.0101617	0.00826677	23261/3577/133/135/27040/6818/445329/375346/222487/100137049/4831/3579/2357/2358/7320/5566/997/6717/643/2774/5336/9170/10900/1760/2039/196883/114804/374403/57192/2931/5026/2778/801/2281/8877/84658/5138/54331/91860/3084/58515/933/2946/3632/51643/5598/9034/11163/79041/4157/1232/683/5025/120892/6546/51024/5164/6351/10335/5196/916/83988/5335/53637/8844/7535/126306/5575/1240/2633/4772/5141/7422/2274/7…	96
BP	GO:0030258	lipid modification	62/2907	271/18866	0.000718985	0.0102613	0.00834776	30/8897/2109/51763/5296/5447/1375/84649/440503/5289/84129/208/1606/10005/55825/64748/55268/2053/56848/8877/10162/129642/2629/375133/3632/145567/1666/5467/240/1632/23600/51094/55529/6342/55361/8309/207/8651/64840/9619/347/7941/83667/10903/51/80271/6484/5728/79143/20/728233/3613/9021/5468/6483/1154/341/5166/247/2168/348/336	62
BP	GO:1905954	positive regulation of lipid localization	27/2907	94/18866	0.000727909	0.0103477	0.00841808	2874/440503/10938/27166/80820/10162/5608/8398/10347/5025/6342/80149/161247/302/718/9619/56729/4282/1066/4481/26119/1588/123/6696/29923/348/4035	27
BP	GO:0001676	long-chain fatty acid metabolic process	31/2907	113/18866	0.000729207	0.0103477	0.00841808	30/100137049/5595/4051/10005/2180/1564/2053/10998/4056/2946/66002/23305/11000/2948/240/2181/84830/6342/5066/6916/8605/51390/9536/51/4048/3248/5730/1545/247/2944	31
BP	GO:0045064	T-helper 2 cell differentiation	8/2907	15/18866	0.000730053	0.0103477	0.00841808	5590/3566/604/602/5914/3142/10538/2625	8
BP	GO:0045851	pH reduction	19/2907	58/18866	0.00076474	0.0108146	0.0087979	1201/527/9114/6556/147007/653519/51463/51382/533/155066/55647/10312/529/535/1203/56833/79641/526/356	19
BP	GO:0070252	actin-mediated cell contraction	33/2907	123/18866	0.000767745	0.0108324	0.00881236	7168/6717/4635/29098/4637/23327/6324/274/7136/4607/3753/1674/7111/7134/3759/7139/7138/7140/4633/3784/2258/4703/1824/58/102723475/4625/7125/4604/8557/4634/4632/7169/7135	33
BP	GO:0006767	water-soluble vitamin metabolic process	25/2907	85/18866	0.000770638	0.0108485	0.00882546	10588/55350/8875/6573/8566/54/27010/11330/80025/113235/79178/326625/1528/6515/5091/6947/2350/51293/8277/573971/6513/8876/5644/440387/6948	25
BP	GO:0048872	homeostasis of number of cells	59/2907	256/18866	0.000787199	0.0110565	0.00899468	27040/10296/60682/3579/23210/2323/338442/2039/604/8740/3303/567/11035/10162/10312/27240/3162/23495/8772/2038/581/3059/677/5423/207/57864/10018/3304/2207/212/2034/116151/669/7422/4282/4151/6688/1236/115650/2539/6223/3050/6886/3965/9636/2625/1777/5320/3575/11151/6521/1831/2623/51327/84433/2113/7001/10661/9935	59
BP	GO:0002468	dendritic cell antigen processing and presentation	7/2907	12/18866	0.000791245	0.0110631	0.00900009	968/6556/2213/50856/64127/1236/7057	7
BP	GO:0043301	negative regulation of leukocyte degranulation	7/2907	12/18866	0.000791245	0.0110631	0.00900009	3134/2213/634/11314/3162/29/3965	7
BP	GO:0048525	negative regulation of viral process	29/2907	104/18866	0.000801267	0.011178	0.00909357	8812/3669/51763/10581/81559/200315/9218/8519/10318/60489/8638/5359/6590/10410/55337/51652/6351/80149/2219/4057/4938/4599/84875/2934/9636/6348/6352/9582/3434	29
BP	GO:0009267	cellular response to starvation	41/2907	163/18866	0.000803901	0.0111896	0.00910295	7494/11337/8897/8428/11152/8678/55062/7378/7942/11345/5595/5289/26100/64121/5571/23710/84557/57535/55630/643246/81631/201163/81788/23378/2629/6715/120892/10533/80149/83667/6720/8131/10634/6513/51100/1824/213/2752/5899/5166/102724428	41
BP	GO:0043618	regulation of transcription from RNA polymerase II promoter in response to stress	30/2907	109/18866	0.000830946	0.0115401	0.00938811	112398/5715/5700/5719/22933/5683/5687/5698/7311/7316/6921/5699/3303/112399/5710/3162/1051/5598/9491/9861/2034/7422/83667/4504/5721/6923/9531/3337/1649/7314	30
BP	GO:0030004	cellular monovalent inorganic cation homeostasis	31/2907	114/18866	0.000856156	0.0118636	0.00965129	1201/527/9114/6556/147007/5595/653519/51463/51382/65010/154881/65082/533/155066/55647/23327/10312/529/535/1203/56833/120892/6546/79641/84286/3759/526/356/3778/23315/6521	31
BP	GO:0045807	positive regulation of endocytosis	28/2907	100/18866	0.000911084	0.0125965	0.0102476	1201/409/51160/5336/10211/1785/23011/567/23327/6622/967/1191/7251/6453/10347/160/120892/9026/302/718/7422/929/11031/26119/977/5468/348/4035	28
BP	GO:0035966	response to topologically incorrect protein	49/2907	205/18866	0.000914643	0.0126176	0.0102647	7494/3310/6818/51009/3300/7353/445329/9570/55062/9114/100137049/9217/10273/55139/5526/3338/2931/3303/118424/9797/10133/4287/3305/57414/1191/10987/7709/581/2161/2137/55738/2081/10018/3304/3311/26270/153222/9709/8452/285533/27129/9531/55658/64061/7057/3337/1649/3315/871	49
BP	GO:0009896	positive regulation of catabolic process	95/2907	454/18866	0.000927069	0.0127606	0.010381	8517/112398/11267/51079/5700/3300/1453/55743/65018/7942/4946/22933/5261/5595/440503/79016/51099/51160/6794/9528/10273/5210/208/4947/10524/53840/8742/572/11060/57535/201163/4210/2931/3303/5209/400410/9810/26088/79888/9554/23327/51548/10133/2629/6622/83547/4287/25793/101/3162/25820/79156/1191/84300/1634/581/5208/120892/10533/23192/6642/975/64115/677/4092/1263/80149/1075/207/10018/3304/9567/83667/51…	95
BP	GO:0002824	positive regulation of adaptive immune response based on somatic recombination of immune receptors built from immunoglobulin superfamily domains	29/2907	105/18866	0.00094667	0.0130015	0.010577	3134/6556/5590/10459/51571/4049/567/8741/3106/3554/3142/8809/8772/958/10666/149840/975/30009/29126/2207/718/3594/3105/115650/8417/2625/940/6375/2208	29
BP	GO:0043030	regulation of macrophage activation	19/2907	59/18866	0.0009672	0.0132248	0.0107587	2213/3566/8877/120892/80149/1075/671/79155/4317/4282/3586/8530/6095/6348/84868/7057/9173/11326/7099	19
BP	GO:0050707	regulation of cytokine secretion	19/2907	59/18866	0.0009672	0.0132248	0.0107587	2213/26253/54106/3661/8651/56253/2268/929/4282/7096/7100/91662/3586/81793/6288/51311/7293/3458/7097	19
BP	GO:0046777	protein autophosphorylation	55/2907	237/18866	0.000979278	0.0133605	0.010869	1198/8428/23604/65018/4831/8576/5527/2869/5595/9625/5566/9961/6794/5605/5526/1613/11035/2041/660/640/801/6503/9175/25865/8569/2047/10494/3932/10553/2534/780/2064/4294/4296/120892/3702/2081/207/3055/814/6793/7535/50488/2268/7422/10188/2872/1020/415116/91662/8408/10457/23178/5058/2050	55
BP	GO:0048246	macrophage chemotaxis	15/2907	42/18866	0.000988499	0.0134566	0.0109472	1652/5595/3958/51192/728/56833/4485/1240/4282/6348/6352/6288/7057/1588/719	15
BP	GO:0031396	regulation of protein ubiquitination	50/2907	211/18866	0.00100081	0.0135944	0.0110593	2874/6500/3300/55743/65018/51547/51256/9683/5300/8878/409/51160/10273/10459/2931/5414/3303/9810/100287171/8877/8841/51035/83593/55611/8291/10016/2534/26232/150684/79142/64689/120892/4092/207/3304/374969/64127/1020/10625/706/51343/9709/8452/5728/84875/27338/9636/7321/57162/7314	50
BP	GO:0009225	nucleotide-sugar metabolic process	14/2907	38/18866	0.00101764	0.0137625	0.0111961	5372/2987/51005/55577/2931/54187/197258/5373/4245/29925/7264/4351/5973/55790	14
BP	GO:0071276	cellular response to cadmium ion	14/2907	38/18866	0.00101764	0.0137625	0.0111961	4318/653361/5595/7323/4501/4494/4968/3162/207/4504/4502/2934/4493/4495	14
BP	GO:0002710	negative regulation of T cell mediated immunity	9/2907	19/18866	0.00102248	0.0137979	0.0112249	3134/2213/634/383/4092/30009/10859/6375/3575	9
BP	GO:0045017	glycerolipid biosynthetic process	61/2907	270/18866	0.00109826	0.0147288	0.0119822	57048/1120/8897/1201/65258/51763/1460/5296/10809/2710/100137049/84649/162466/2358/440503/6901/5289/51099/5279/137964/5336/1606/51227/2180/5338/51205/283/59338/5283/56994/9489/79888/660/100996939/57153/10162/5359/23533/8694/8398/5833/64419/2181/5130/255919/10423/55361/58488/8605/718/54344/6720/8818/5728/79143/9091/84803/43/5320/10677/336	61
BP	GO:0042130	negative regulation of T cell proliferation	20/2907	64/18866	0.0010986	0.0147288	0.0119822	8379/383/8764/654346/1051/2064/10288/64115/10859/29126/56253/284194/3586/3965/10457/6375/51043/84868/57162/11326	20
BP	GO:0046686	response to cadmium ion	20/2907	64/18866	0.0010986	0.0147288	0.0119822	4318/653361/5595/383/7323/4501/567/4494/4968/3162/1528/207/4864/4504/4502/1027/2934/4493/4495/6678	20
BP	GO:2000379	positive regulation of reactive oxygen species metabolic process	29/2907	106/18866	0.00111453	0.0148588	0.0120879	3043/2358/4835/57126/22914/1785/11035/23410/6622/1191/1535/5025/80149/207/64581/100528032/4317/3383/9759/1647/706/7305/23564/55022/3684/7057/3689/3458/7099	29
BP	GO:0051453	regulation of intracellular pH	25/2907	87/18866	0.00111687	0.0148588	0.0120879	1201/527/9114/6556/147007/653519/51463/51382/65010/65082/533/155066/55647/10312/529/535/1203/56833/120892/79641/84286/526/356/23315/6521	25
BP	GO:0055072	iron ion homeostasis	25/2907	87/18866	0.00111687	0.0148588	0.0120879	6500/654483/4738/2495/9114/552900/6556/147007/3163/23479/51312/6717/2512/3934/10058/567/113235/79689/3162/2038/4057/212/2034/8692/3458	25
BP	GO:0009743	response to carbohydrate	54/2907	233/18866	0.00111789	0.0148588	0.0120879	7494/4704/4087/5603/4831/10135/8892/5566/6717/6810/65010/572/65220/5908/2029/9854/2281/5608/23098/8398/388581/1535/5467/5208/5894/10533/677/6546/8938/5798/51024/2081/5127/26056/64581/1292/5906/3383/51714/83667/51092/56943/6720/415116/5728/10804/1027/2852/7057/2752/1471/6678/4035/336	54
BP	GO:0061387	regulation of extent of cell growth	30/2907	111/18866	0.0011447	0.0151826	0.0123514	3611/81565/28988/51330/1785/23011/9798/10509/2664/2017/9175/10507/3475/7869/1382/64218/8851/10501/7422/8766/4504/1020/2258/8482/1627/5058/2335/6696/348/4035	30
BP	GO:0008654	phospholipid biosynthetic process	61/2907	271/18866	0.00120843	0.0159936	0.0130111	57048/1120/8897/1201/65258/51763/1460/5296/10809/100137049/162466/2358/6901/5289/51099/5279/137964/4598/5336/1606/51227/5338/51205/4597/59338/5283/56994/9489/79888/2224/660/100996939/57153/56848/10162/129642/5359/23533/8398/5833/5467/11145/64419/2181/5130/10423/55361/161247/58488/8605/54344/8818/5728/79143/9091/3074/84803/20/43/5320/336	61
BP	GO:0006766	vitamin metabolic process	34/2907	131/18866	0.00121147	0.0159996	0.013016	10588/55350/79001/4051/8875/6573/8566/54/27010/8854/11330/80025/113235/79178/326625/1528/66002/6515/5091/5467/6947/1593/2350/51293/8277/7421/573971/6513/8876/5641/5644/440387/3458/6948	34
BP	GO:0009226	nucleotide-sugar biosynthetic process	10/2907	23/18866	0.00122707	0.0160769	0.0130789	5372/51005/55577/54187/197258/5373/29925/7264/4351/5973	10
BP	GO:0009251	glucan catabolic process	10/2907	23/18866	0.00122707	0.0160769	0.0130789	5261/79660/8972/801/5837/5256/5236/5836/5509/2548	10
BP	GO:0035743	CD4-positive, alpha-beta T cell cytokine production	10/2907	23/18866	0.00122707	0.0160769	0.0130789	8807/5590/383/1604/3554/8809/975/30009/2625/6375	10
BP	GO:0042775	mitochondrial ATP synthesis coupled electron transport	27/2907	97/18866	0.0012277	0.0160769	0.0130789	126328/4704/4701/6391/51079/374291/65018/4714/4696/4729/54949/23479/6901/4708/4728/1327/637/4718/1337/6389/4204/6622/10975/4707/4695/9167/1339	27
BP	GO:0002523	leukocyte migration involved in inflammatory response	8/2907	16/18866	0.0012635	0.016407	0.0133474	2867/101/6280/56833/240/2529/6279/3689	8
BP	GO:0033033	negative regulation of myeloid cell apoptotic process	8/2907	16/18866	0.0012635	0.016407	0.0133474	10296/3579/2207/3665/4282/64127/6352/350	8
BP	GO:0051014	actin filament severing	8/2907	16/18866	0.0012635	0.016407	0.0133474	1072/23380/2314/752/6840/2934/10677/822	8
BP	GO:0090083	regulation of inclusion body assembly	8/2907	16/18866	0.0012635	0.016407	0.0133474	3300/997/3303/10049/1191/3304/3337/55466	8
BP	GO:0050920	regulation of chemotaxis	53/2907	229/18866	0.00127614	0.0165364	0.0134527	23604/1652/3579/27202/3603/2358/5595/7114/23053/6810/22914/51571/11240/6809/8740/10509/25865/8291/10507/63940/728/4354/7869/56833/683/80024/5025/4485/4681/6351/1803/64218/9750/1240/10501/100528032/7422/4282/1901/7941/1236/8482/3965/6846/5641/6348/6352/6375/7057/1588/1230/719/3315	53
BP	GO:0003009	skeletal muscle contraction	15/2907	43/18866	0.00130438	0.0168671	0.0137218	1760/7136/2946/126306/7134/3759/7138/4151/113246/7140/4625/7125/8557/2548/7135	15
BP	GO:0042742	defense response to bacterium	75/2907	348/18866	0.00132773	0.0171291	0.0139349	8993/22933/28639/6556/3240/1667/2358/728358/2634/306/3537/4671/54145/22914/3934/54/26253/4049/5266/283/8764/79792/602/820/10133/8347/1668/6590/8398/728/1051/54106/10578/6280/1535/56833/6283/388077/5199/55876/28638/10417/4057/671/2207/8970/1669/11334/100528032/338339/2268/22861/64127/6279/3105/29108/7100/28526/3586/6223/58484/9636/6403/944/5320/84868/5225/5473/28473/1053/7097/100423062/7099/28452/…	75
BP	GO:0006801	superoxide metabolic process	22/2907	74/18866	0.00133018	0.0171291	0.0139349	6648/653361/2358/654816/57126/54/654817/23410/1535/683/4688/51167/64581/4504/9973/7305/573971/3684/4689/3689/10394/7001	22
BP	GO:0032755	positive regulation of interleukin-6 production	25/2907	88/18866	0.00133546	0.0171614	0.0139612	7494/5603/3603/4155/353514/11027/54106/10288/1535/10417/5450/2207/64581/8692/4317/64127/7096/7305/29108/3965/51311/388325/3458/7097/7099	25
BP	GO:0031640	killing of cells of other organism	20/2907	65/18866	0.00136042	0.0173963	0.0141522	8993/1667/728358/572/383/820/1668/10578/6283/5196/10018/4057/8970/64581/1669/11334/6223/5551/2208/3458	20
BP	GO:0006656	phosphatidylcholine biosynthetic process	14/2907	39/18866	0.00136496	0.0173963	0.0141522	1120/1460/10809/162466/137964/56994/79888/57153/10162/2181/5130/58488/43/336	14
BP	GO:0042092	type 2 immune response	14/2907	39/18866	0.00136496	0.0173963	0.0141522	5590/3566/383/604/602/5914/3142/975/30009/10538/64127/3586/2625/6375	14
BP	GO:1902116	negative regulation of organelle assembly	14/2907	39/18866	0.00136496	0.0173963	0.0141522	29082/65018/51256/27243/23329/1785/9554/197135/79142/120892/9638/55755/8558/26471	14
BP	GO:0002793	positive regulation of peptide secretion	46/2907	193/18866	0.00137074	0.0173982	0.0141538	7494/5715/135/79971/11132/322/6717/6810/338442/572/26253/65220/283/9854/55691/23410/640/50855/8398/101/388581/6453/5467/3661/5208/8938/18/9619/56253/2268/929/4282/51714/6279/3586/2852/8754/43/5950/6288/2752/7293/3458/7097/4035/7099	46
BP	GO:0030041	actin filament polymerization	46/2907	193/18866	0.00137074	0.0173982	0.0141538	79585/653440/374666/28988/10093/11078/7114/9051/51571/2039/10092/51734/23406/283/89848/7408/100287171/2017/274/10458/10435/375307/2314/10602/3059/51466/26999/9026/4641/3055/7111/81873/10095/3383/81553/342184/29108/1236/6840/2934/1627/6710/22921/10677/11151/822	46
BP	GO:0008202	steroid metabolic process	72/2907	332/18866	0.00137555	0.0174236	0.0141745	30/133/9885/6818/445329/5447/84649/51478/10948/1595/112812/6256/10273/4598/51706/10005/5959/10901/4802/84681/4597/6817/59338/2224/2053/80025/10162/64788/10998/27122/4204/2629/23780/6715/5087/5467/10577/23600/51700/1593/6342/10826/8309/6609/9619/1645/4864/80270/4504/6720/231/1066/706/10682/2539/7421/55911/26119/5641/20/6095/10170/1545/1588/1717/1646/27284/341/6696/3458/348/336	72
BP	GO:0050858	negative regulation of antigen receptor-mediated signaling pathway	12/2907	31/18866	0.00140015	0.0175295	0.0142606	2874/2213/634/79037/11314/3958/933/11006/115352/2633/53347/5795	12
BP	GO:0006691	leukotriene metabolic process	13/2907	35/18866	0.00140089	0.0175295	0.0142606	4259/4051/2678/241/4056/66002/240/2681/4048/64174/1357/10394/7097	13
BP	GO:0032633	interleukin-4 production	13/2907	35/18866	0.00140089	0.0175295	0.0142606	5590/5914/1051/3702/51176/916/2207/959/3965/2625/940/84868/1649	13
BP	GO:0042407	cristae formation	13/2907	35/18866	0.00140089	0.0175295	0.0142606	65018/10476/6901/518/6687/539/9551/125988/400916/516/514/521/513	13
BP	GO:0045066	regulatory T cell differentiation	13/2907	35/18866	0.00140089	0.0175295	0.0142606	604/3659/10288/1378/11006/64115/8651/2529/8784/3965/940/3902/3458	13
BP	GO:0048821	erythrocyte development	13/2907	35/18866	0.00140089	0.0175295	0.0142606	10296/23210/2039/604/2038/212/116151/669/2539/3050/6886/6521/2623	13
BP	GO:0006826	iron ion transport	23/2907	79/18866	0.00142859	0.0178401	0.0145133	527/2495/9114/6556/23479/51382/51312/2512/3934/10058/1785/57192/533/567/155066/113235/10312/529/535/4057/55640/526/3458	23
BP	GO:0001818	negative regulation of cytokine production	77/2907	360/18866	0.00144134	0.0179631	0.0146134	7353/3134/5094/8993/6556/27202/5004/2213/7114/5300/409/10524/353514/634/7850/54/383/604/4210/602/5914/114769/307/4795/57447/654346/2629/3162/84166/5971/54106/4157/3661/64115/51176/4092/201633/30009/6504/80149/10859/29126/100133941/4057/671/1240/2633/11334/4317/50856/79132/347/706/7305/29108/91662/284194/3586/5443/1236/28951/3965/10457/9636/2625/6375/84868/7057/51311/23547/9173/1649/7293/11326/345…	77
BP	GO:0006942	regulation of striated muscle contraction	27/2907	98/18866	0.00145	0.0179986	0.0146422	51130/5566/6717/1760/29098/801/2281/274/4607/2946/79041/5025/4092/6546/80149/9759/3759/113246/5997/7140/4633/3784/2258/1824/4625/4634/7135	27
BP	GO:0042773	ATP synthesis coupled electron transport	27/2907	98/18866	0.00145	0.0179986	0.0146422	126328/4704/4701/6391/51079/374291/65018/4714/4696/4729/54949/23479/6901/4708/4728/1327/637/4718/1337/6389/4204/6622/10975/4707/4695/9167/1339	27
BP	GO:0007007	inner mitochondrial membrane organization	17/2907	52/18866	0.00145869	0.0180703	0.0147005	440574/51079/65018/4580/10476/6901/518/6687/539/8834/9551/125988/400916/516/514/521/513	17
BP	GO:0038093	Fc receptor signaling pathway	55/2907	241/18866	0.00147167	0.0181947	0.0148017	8517/5715/6500/5700/27040/5719/5296/5683/5687/5698/2213/10093/5595/3537/28893/9402/2212/5336/5338/26253/10092/2214/2210/28921/2209/5699/919/801/10458/8398/2534/5710/388077/3702/26999/9491/4641/3055/5335/9861/2207/4772/10095/338339/2268/5906/3937/917/5721/5058/28919/5795/23547/84433/28452	55
BP	GO:0002430	complement receptor mediated signaling pathway	7/2907	13/18866	0.00148664	0.0182703	0.0148633	27202/2357/2358/728/1378/1240/719	7
BP	GO:1902563	regulation of neutrophil activation	7/2907	13/18866	0.00148664	0.0182703	0.0148633	2213/57126/11314/29/3684/5320/3689	7
BP	GO:1902902	negative regulation of autophagosome assembly	7/2907	13/18866	0.00148664	0.0182703	0.0148633	29082/65018/9554/79142/120892/9638/26471	7
BP	GO:0006885	regulation of pH	28/2907	103/18866	0.00149372	0.018321	0.0149045	1201/527/9114/6556/147007/5595/653519/51463/51382/65010/65082/533/155066/55647/10312/529/535/1203/56833/120892/5164/79641/84286/526/356/23315/6521/5166	28
BP	GO:0032535	regulation of cellular component size	81/2907	383/18866	0.00154799	0.0189289	0.015399	3611/653440/11267/1201/374666/81565/28988/10093/11078/7114/389541/51330/56996/1785/51571/2039/10092/23406/23011/9798/89848/10542/10509/7408/100287171/2664/2017/9175/274/10458/10435/10507/1072/83547/3475/7869/5916/2314/10602/1382/3059/51466/26999/9026/4641/207/3055/64218/7111/8851/81873/10501/10095/7422/8766/3383/81553/4504/1020/342184/29108/5728/1236/2258/6840/4703/3778/2934/8482/1627/5058/2335/6…	81
BP	GO:1903707	negative regulation of hemopoiesis	39/2907	158/18866	0.00154939	0.0189289	0.015399	8370/11025/4831/8993/2213/56834/634/554313/3566/604/80349/8363/5914/3659/25793/3142/2064/3280/11006/677/4092/30009/5196/80149/10859/1840/8651/4057/29909/55365/6886/3902/6348/51043/714/28959/7001/7099/9935	39
BP	GO:0002223	stimulatory C-type lectin receptor signaling pathway	30/2907	113/18866	0.00155669	0.0189806	0.0154411	8517/5715/6500/5700/5719/5683/3385/5687/5698/5566/5336/22914/26253/5699/3384/2534/5710/5971/5894/200958/9491/9861/2207/100528032/338339/50856/5721/5058/10462/84433	30
BP	GO:0032271	regulation of protein polymerization	53/2907	231/18866	0.00156613	0.0189908	0.0154494	653440/374666/65018/24139/28988/22924/10093/11078/7114/51571/2039/10092/6904/23406/89848/29098/3303/7408/100287171/2017/274/10458/10435/4204/6622/2314/10602/3059/51466/26999/9026/4641/3055/3304/7111/8851/55755/81873/10095/3383/81553/342184/29108/1236/6840/1027/2934/1627/5058/6710/10677/11151/822	53
BP	GO:0043903	regulation of symbiotic process	53/2907	231/18866	0.00156613	0.0189908	0.0154494	5435/8812/11267/3669/51763/10581/27243/81559/9217/200315/9218/10450/8519/10318/53840/572/5439/383/60489/8638/5438/5434/79720/5359/1072/6590/10410/3482/6993/55337/7251/5091/9150/51652/51176/3429/6351/80149/2219/10018/4057/4938/4599/84875/2934/3965/9636/940/6348/6352/9582/3434/348	53
BP	GO:0030048	actin filament-based movement	38/2907	153/18866	0.00156673	0.0189908	0.0154494	7168/23224/6717/4635/29098/4637/23327/6324/274/7136/4607/4648/4542/3753/1674/4643/4641/7111/7134/3759/7139/7138/7140/4633/3784/2258/4703/1824/58/102723475/4625/7125/4604/8557/4634/4632/7169/7135	38
BP	GO:0002524	hypersensitivity	6/2907	10/18866	0.00159427	0.0191741	0.0155985	2213/2207/718/2529/1236/2625	6
BP	GO:0030388	fructose 1,6-bisphosphate metabolic process	6/2907	10/18866	0.00159427	0.0191741	0.0155985	226/230/5213/2203/229/3458	6
BP	GO:0062012	regulation of small molecule metabolic process	94/2907	456/18866	0.00160218	0.0191741	0.0155985	5715/11277/133/5700/1201/5719/51763/65018/10296/5447/51547/84649/4946/5683/5687/1595/5698/5223/5261/440503/7114/6901/4598/60343/5210/79660/208/4947/5571/634/4802/572/4597/80183/201163/2931/2954/5699/5209/2224/2053/56848/80025/51548/10162/64788/978/27122/6622/5710/388581/65990/9056/7033/160/5467/5208/4485/51094/5164/9491/207/9861/8021/9619/9759/83667/6720/1066/51293/54541/5443/26471/5721/7421/5700…	94
BP	GO:0002544	chronic inflammatory response	9/2907	20/18866	0.00160644	0.0191741	0.0155985	4049/6280/9536/6279/3586/8876/6352/7057/1588	9
BP	GO:0002577	regulation of antigen processing and presentation	9/2907	20/18866	0.00160644	0.0191741	0.0155985	968/6556/2213/10288/64127/29108/3112/1236/7057	9
BP	GO:0051767	nitric-oxide synthase biosynthetic process	9/2907	20/18866	0.00160644	0.0191741	0.0155985	10135/5608/54106/120892/64127/2208/3458/7097/7099	9
BP	GO:0051769	regulation of nitric-oxide synthase biosynthetic process	9/2907	20/18866	0.00160644	0.0191741	0.0155985	10135/5608/54106/120892/64127/2208/3458/7097/7099	9
BP	GO:0038034	signal transduction in absence of ligand	22/2907	75/18866	0.0016128	0.0191741	0.0155985	27429/3934/572/842/2931/3303/1613/2534/5598/8772/581/598/5196/207/597/10018/3304/55437/2872/9531/2623/7001	22
BP	GO:0061844	antimicrobial humoral immune response mediated by antimicrobial peptide	22/2907	75/18866	0.0016128	0.0191741	0.0155985	8993/1667/728358/60343/54145/283/820/8347/1668/2919/10578/6280/6283/5196/4057/8970/5197/1669/6223/5967/5225/5473	22
BP	GO:0097192	extrinsic apoptotic signaling pathway in absence of ligand	22/2907	75/18866	0.0016128	0.0191741	0.0155985	27429/3934/572/842/2931/3303/1613/2534/5598/8772/581/598/5196/207/597/10018/3304/55437/2872/9531/2623/7001	22
BP	GO:0030641	regulation of cellular pH	26/2907	94/18866	0.00165338	0.0196189	0.0159603	1201/527/9114/6556/147007/5595/653519/51463/51382/65010/65082/533/155066/55647/10312/529/535/1203/56833/120892/79641/84286/526/356/23315/6521	26
BP	GO:1905521	regulation of macrophage migration	15/2907	44/18866	0.0017008	0.0201429	0.0163867	1652/5595/728/56833/5025/975/4485/1240/4282/6348/6352/7057/1588/928/719	15
BP	GO:0006626	protein targeting to mitochondrion	27/2907	99/18866	0.00170614	0.0201676	0.0164068	51079/65018/10245/728489/130916/27429/55072/637/59286/7323/2931/118424/80273/56947/92609/9520/401505/25793/3305/22885/120892/51024/51025/6720/706/51100/9531	27
BP	GO:1901136	carbohydrate derivative catabolic process	46/2907	195/18866	0.00171317	0.0202121	0.016443	7378/8993/200315/80896/51005/55577/4758/23670/1117/6448/60489/23583/1118/2931/3073/51733/5138/1116/978/10855/4968/4245/79661/2629/93611/2588/440672/26232/11163/1890/5973/1634/26270/8692/30833/5141/1514/6383/1486/10894/3074/9582/1471/131870/313/1462	46
BP	GO:0070482	response to oxygen levels	83/2907	396/18866	0.00178747	0.0210487	0.0171235	112398/5715/133/5700/5719/65018/9114/22933/5683/10135/147007/5687/5698/8837/3163/7311/5300/10273/7316/572/6921/4049/283/5699/64428/114769/112399/8996/9520/4204/5710/101/3162/29988/57085/1410/1535/5467/5894/10533/677/5423/1263/6546/51024/5066/1803/9491/207/27087/100133941/9861/51167/212/18/2034/7422/3383/4504/26355/4151/54541/5351/5728/5721/6923/1027/3778/6513/10397/5058/6095/5468/5967/7057/358/36…	83
BP	GO:0009199	ribonucleoside triphosphate metabolic process	24/2907	85/18866	0.001808	0.0211674	0.0172201	65018/4831/10476/7114/6901/518/226/9605/201163/56848/539/10201/9551/65990/120892/9567/516/514/521/513/3614/4832/55022/168537	24
BP	GO:0042594	response to starvation	48/2907	206/18866	0.00181154	0.0211674	0.0172201	7494/11337/8897/133/8428/11152/8678/55062/7378/7942/11345/5595/5289/54828/26100/64121/5571/23710/84557/57535/55630/643246/81631/201163/81788/23378/3155/2629/6715/120892/10533/80149/122622/83667/6720/8131/10634/8408/6513/51100/1824/5468/213/2752/5899/1649/5166/102724428	48
BP	GO:0002719	negative regulation of cytokine production involved in immune response	10/2907	24/18866	0.00181548	0.0211674	0.0172201	3134/383/604/3162/4092/30009/10859/3586/6375/336	10
BP	GO:0032753	positive regulation of interleukin-4 production	10/2907	24/18866	0.00181548	0.0211674	0.0172201	5590/5914/1051/916/2207/959/3965/2625/940/84868	10
BP	GO:0034123	positive regulation of toll-like receptor signaling pathway	10/2907	24/18866	0.00181548	0.0211674	0.0172201	10211/353376/54106/1535/4057/7096/7100/285852/57162/7097	10
BP	GO:0009201	ribonucleoside triphosphate biosynthetic process	21/2907	71/18866	0.00181806	0.0211674	0.0172201	65018/4831/10476/7114/6901/518/226/9605/201163/56848/539/10201/9551/65990/516/514/521/513/3614/4832/55022	21
BP	GO:0000041	transition metal ion transport	33/2907	129/18866	0.00183654	0.0213424	0.0173625	527/2495/9114/6556/475/23479/51382/51312/10063/2512/3934/10058/1785/55630/1318/57192/533/567/155066/113235/10312/9914/529/79689/535/6947/4057/55640/91252/4504/526/3458/6948	33
BP	GO:2001244	positive regulation of intrinsic apoptotic signaling pathway	19/2907	62/18866	0.00187006	0.0216913	0.0176463	8678/27113/572/637/201163/5414/11035/3932/79156/6280/581/598/51024/5883/10018/6279/26471/1649/7314	19
BP	GO:0002701	negative regulation of production of molecular mediator of immune response	13/2907	36/18866	0.00188707	0.0217663	0.0177074	3134/2213/383/604/3162/933/4092/30009/10859/115352/3586/6375/336	13
BP	GO:0006007	glucose catabolic process	13/2907	36/18866	0.00188707	0.0217663	0.0177074	5223/226/572/230/5213/2027/3101/5208/669/2026/8277/5224/229	13
BP	GO:0071402	cellular response to lipoprotein particle stimulus	13/2907	36/18866	0.00188707	0.0217663	0.0177074	968/84830/975/207/2207/9619/4864/1066/5468/3689/928/348/7099	13
BP	GO:0050792	regulation of viral process	50/2907	217/18866	0.00189865	0.0218592	0.0177829	5435/8812/11267/3669/51763/10581/27243/81559/9217/200315/9218/10450/8519/10318/53840/5439/60489/8638/5438/5434/79720/5359/1072/6590/10410/3482/6993/55337/7251/5091/9150/51652/51176/3429/6351/80149/2219/4057/4938/4599/84875/2934/3965/9636/940/6348/6352/9582/3434/348	50
BP	GO:0061620	glycolytic process through glucose-6-phosphate	11/2907	28/18866	0.00191393	0.0219535	0.0178596	5223/226/230/5213/2584/2027/3101/669/2026/5224/229	11
BP	GO:0090383	phagosome acidification	11/2907	28/18866	0.00191393	0.0219535	0.0178596	527/9114/51382/533/155066/55647/10312/529/535/56833/526	11
BP	GO:0032673	regulation of interleukin-4 production	12/2907	32/18866	0.00192959	0.0220515	0.0179393	5590/5914/1051/51176/916/2207/959/3965/2625/940/84868/1649	12
BP	GO:0045589	regulation of regulatory T cell differentiation	12/2907	32/18866	0.00192959	0.0220515	0.0179393	604/3659/10288/1378/11006/64115/8651/8784/3965/940/3902/3458	12
BP	GO:0045069	regulation of viral genome replication	27/2907	100/18866	0.0020002	0.0228163	0.0185616	8812/3669/51763/10581/9217/200315/9218/10450/8519/10318/60489/8638/5359/6590/10410/55337/3429/80149/4057/4938/4599/84875/9636/940/6352/9582/3434	27
BP	GO:0007034	vacuolar transport	37/2907	150/18866	0.00203813	0.0232063	0.0188788	29082/11267/1201/8678/374666/65018/9570/9114/200312/64400/27243/9482/80700/2580/51160/9146/93343/114804/29911/65082/3303/79720/22898/274/83547/3482/1191/7251/64601/23484/51652/120892/10490/8906/4864/6272/4035	37
BP	GO:0072678	T cell migration	20/2907	67/18866	0.00204578	0.0232506	0.0189148	58191/1667/728358/8740/8764/11035/58515/101/8772/9750/7535/3383/347/1901/29108/6846/6348/6352/6375/3695	20
BP	GO:0019915	lipid storage	23/2907	81/18866	0.00205483	0.0233093	0.0189626	2867/84649/440503/10938/51099/26580/8291/8694/5467/80149/161247/8605/84266/718/9619/1066/4481/3074/5468/3690/123/29923/348	23
BP	GO:0001666	response to hypoxia	76/2907	359/18866	0.00205981	0.0233093	0.0189626	112398/5715/133/5700/5719/65018/22933/5683/5687/5698/8837/3163/7311/5300/10273/7316/572/6921/4049/283/5699/64428/114769/112399/8996/9520/4204/5710/101/3162/29988/57085/1410/1535/5467/5894/677/1263/6546/51024/5066/1803/9491/207/27087/100133941/9861/212/18/2034/7422/3383/4504/26355/4151/54541/5351/5728/5721/6923/1027/3778/6513/10397/5058/6095/5967/7057/358/360/1471/7314/2113/2168/29923/7097	76
BP	GO:0016045	detection of bacterium	8/2907	17/18866	0.002066	0.0233093	0.0189626	8993/4671/3106/64127/7096/3105/58484/7097	8
BP	GO:0048535	lymph node development	8/2907	17/18866	0.002066	0.0233093	0.0189626	643/4050/4049/11035/8772/3600/5423/3575	8
BP	GO:0009141	nucleoside triphosphate metabolic process	29/2907	110/18866	0.00207048	0.0233173	0.0189691	65018/4831/9519/2987/203/10476/7114/6901/518/226/9605/201163/56848/539/10201/9551/65990/120892/9567/516/514/521/513/10924/3614/4832/55022/131870/168537	29
BP	GO:0072655	establishment of protein localization to mitochondrion	35/2907	140/18866	0.00208085	0.0233712	0.0190129	51079/65018/10245/728489/27113/130916/27429/55072/572/637/59286/7323/2931/118424/80273/56947/92609/23368/9520/401505/25793/3305/22885/3002/581/120892/51024/207/10018/51025/6720/706/51100/9531/1649	35
BP	GO:0002886	regulation of myeloid leukocyte mediated immunity	18/2907	58/18866	0.0020828	0.0233712	0.0190129	6813/2213/6810/57126/3566/383/640/56848/11314/3162/2207/718/2268/29/7305/3684/3965/3689	18
BP	GO:0031623	receptor internalization	30/2907	115/18866	0.00209095	0.0234202	0.0190528	3577/133/4600/3579/4043/409/5336/10211/634/1785/54550/6622/967/2966/8650/6642/975/6386/10859/2207/7422/4599/84058/11031/26119/43/3690/3689/928/4035	30
BP	GO:1905952	regulation of lipid localization	41/2907	171/18866	0.00214833	0.0240194	0.0195403	2874/440503/10938/27166/51099/208/80820/10162/5608/8398/10347/5467/5025/6342/80149/161247/302/207/84266/718/9619/56729/4282/1066/4481/706/5443/26119/20/5468/3690/7057/1588/123/341/6696/345/29923/348/4035/336	41
BP	GO:0034599	cellular response to oxidative stress	67/2907	310/18866	0.00215518	0.0240258	0.0195455	56616/11277/8428/5603/6648/65018/4318/4831/22933/653361/8807/140809/8837/5595/4482/7168/406/10587/27429/6810/55139/3934/1785/383/84557/5829/59338/116988/3303/11035/8996/23410/2878/8877/10494/6622/25793/2534/3162/5598/1535/240/120892/10533/5164/80149/4688/207/3304/2034/83667/4504/9973/3586/2539/573971/8876/4689/358/1545/51314/1471/2113/7001/2168/3315/7099	67
BP	GO:0016042	lipid catabolic process	73/2907	343/18866	0.00215666	0.0240258	0.0195455	7920/30/2109/1375/100137049/22933/285148/440503/4051/84129/51099/26580/4758/5333/338442/208/5336/10005/55825/283848/84681/5338/55268/3073/151056/8877/79153/2629/8398/10908/79887/66002/1666/6715/5467/11145/9651/84830/1632/23600/154791/1593/6342/8309/207/5335/6609/8605/113026/285848/51390/5920/7941/83667/4504/1066/51/643418/3248/2167/3074/5320/1545/1588/341/6696/1208/313/345/2168/348/4035/336	73
BP	GO:0070266	necroptotic process	15/2907	45/18866	0.00219288	0.0243417	0.0198025	81030/8837/11035/3705/353376/197259/8772/291/8531/929/356/5836/23643/57162/7099	15
BP	GO:0090311	regulation of protein deacetylation	15/2907	45/18866	0.00219288	0.0243417	0.0198025	65018/10467/25855/604/122953/56848/25865/26993/1487/120892/7422/6720/10474/51043/3458	15
BP	GO:0072521	purine-containing compound metabolic process	96/2907	472/18866	0.00221413	0.0245336	0.0199586	11277/6818/65018/445329/84649/4831/55229/2987/5223/203/10476/7114/6901/5635/137964/4598/5210/518/226/10005/60490/5571/2180/196883/572/230/8942/23597/5213/9605/4597/6817/2584/201163/2954/5209/3155/2027/56848/8459/80025/51548/5138/539/10201/9551/8694/440672/4354/65990/11163/23305/3101/5208/120892/2181/2766/8573/9524/5164/8460/8021/9567/516/514/30833/5141/669/122622/521/513/9759/2026/80221/5236/3614…	96
BP	GO:0006754	ATP biosynthetic process	17/2907	54/18866	0.00231048	0.0255555	0.02079	65018/10476/7114/6901/518/226/9605/201163/56848/539/9551/65990/516/514/521/513/55022	17
BP	GO:0042102	positive regulation of T cell proliferation	27/2907	101/18866	0.0023366	0.0257984	0.0209875	1604/283234/23308/58515/8772/3600/10288/3280/923/975/29126/916/100133941/7535/3594/3105/29108/115650/959/3965/940/6352/6375/84868/11151/84433/3109	27
BP	GO:0038083	peptidyl-tyrosine autophosphorylation	14/2907	41/18866	0.00235875	0.0259504	0.0211112	5595/9625/660/640/6503/3932/2534/780/3702/3055/7535/2268/7422/10188	14
BP	GO:2000008	regulation of protein localization to cell surface	14/2907	41/18866	0.00235875	0.0259504	0.0211112	30851/6810/6809/29098/919/23327/150684/23484/10347/207/26056/2207/7305/20	14
BP	GO:0030218	erythrocyte differentiation	31/2907	121/18866	0.00241792	0.0265543	0.0216025	10296/60682/23210/2039/604/3303/567/2038/3059/677/3304/212/2034/116151/669/7422/4151/6688/2539/6223/3050/6886/9636/2625/1777/6521/2623/51327/2113/10661/9935	31
BP	GO:0009142	nucleoside triphosphate biosynthetic process	23/2907	82/18866	0.00244683	0.0268242	0.0218221	65018/4831/9519/203/10476/7114/6901/518/226/9605/201163/56848/539/10201/9551/65990/516/514/521/513/3614/4832/55022	23
BP	GO:0002637	regulation of immunoglobulin production	20/2907	68/18866	0.00248554	0.0271525	0.0220891	7494/11277/2213/6810/10459/3566/604/8741/933/54106/958/149840/30009/115352/3586/959/940/6375/5950/7293	20
BP	GO:0002753	cytoplasmic pattern recognition receptor signaling pathway	20/2907	68/18866	0.00248554	0.0271525	0.0220891	8517/7353/6397/7335/7311/9958/7316/3303/26007/80216/5608/3661/57864/3304/79132/3665/64127/92610/7314/7099	20
BP	GO:2001057	reactive nitrogen species metabolic process	24/2907	87/18866	0.0025407	0.0277061	0.0225395	2644/5447/3043/22914/1785/54/1191/64757/5025/80149/207/64581/100528032/4317/3383/706/3586/23564/6095/1545/3689/3458/7097/7099	24
BP	GO:1903900	regulation of viral life cycle	38/2907	157/18866	0.00256045	0.0278724	0.0226748	8812/11267/3669/51763/10581/27243/81559/9217/200315/9218/10450/8519/10318/53840/60489/8638/79720/5359/6590/10410/55337/7251/5091/51652/3429/80149/2219/4057/4938/4599/84875/2934/3965/9636/940/6352/9582/3434	38
BP	GO:0043525	positive regulation of neuron apoptotic process	18/2907	59/18866	0.00257258	0.0278831	0.0226835	5300/997/4835/842/2931/4296/581/51024/10018/8851/9759/1020/356/7305/26471/3684/6348/1649	18
BP	GO:0001771	immunological synapse formation	7/2907	14/18866	0.00257943	0.0278831	0.0226835	2047/3958/923/975/1236/5551/84868	7
BP	GO:0045591	positive regulation of regulatory T cell differentiation	7/2907	14/18866	0.00257943	0.0278831	0.0226835	604/10288/11006/64115/8651/3965/3458	7
BP	GO:0051709	regulation of killing of cells of other organism	7/2907	14/18866	0.00257943	0.0278831	0.0226835	572/383/10018/64581/5551/2208/3458	7
BP	GO:0033028	myeloid cell apoptotic process	12/2907	33/18866	0.00261235	0.0281407	0.0228931	10296/3579/338442/3661/2207/3665/4282/64127/1514/5728/6352/350	12
BP	GO:0090022	regulation of neutrophil chemotaxis	12/2907	33/18866	0.00261235	0.0281407	0.0228931	23604/3579/27202/8291/728/4354/683/1803/9750/1236/6375/719	12
BP	GO:0051047	positive regulation of secretion	72/2907	340/18866	0.00263043	0.0282373	0.0229716	7494/5715/135/11267/65018/3134/27243/79971/11132/322/6717/6810/338442/57126/9146/3566/572/26253/65220/283/9854/6804/55691/23410/640/56848/5864/5608/50855/6622/8398/101/388581/7251/6453/1535/5467/3661/5208/5025/2181/8938/6386/2207/18/9619/56253/54843/2268/929/56729/4282/51714/1020/6279/3586/3684/2852/8754/43/5950/6288/358/1588/2752/3689/6696/7293/3458/7097/4035/7099	72
BP	GO:1990778	protein localization to cell periphery	72/2907	340/18866	0.00263043	0.0282373	0.0229716	1201/51130/51763/10139/9482/5590/10938/81619/8878/2580/9528/51304/9270/6810/208/116841/90196/10211/582/6809/90410/29098/26088/5864/10133/64130/4118/3958/9914/353116/11079/10098/145567/79156/8825/23136/64689/27065/8650/2181/975/598/26262/5583/8631/302/207/2207/2633/54997/54843/10490/5906/8766/1020/92162/2258/11031/55022/682/26119/2852/8417/10791/23095/20/6521/6281/286/3458/2319/4035	72
BP	GO:0090114	COPII-coated vesicle budding	21/2907	73/18866	0.00264824	0.0282844	0.0230099	51399/126003/1453/51693/9570/9217/8775/9218/2153/5265/9554/149111/10016/1294/27095/2157/64689/7039/966/1075/8452	21
BP	GO:0032373	positive regulation of sterol transport	11/2907	29/18866	0.00265914	0.0282844	0.0230099	2874/80820/10162/10347/6342/302/9619/1066/26119/348/4035	11
BP	GO:0032376	positive regulation of cholesterol transport	11/2907	29/18866	0.00265914	0.0282844	0.0230099	2874/80820/10162/10347/6342/302/9619/1066/26119/348/4035	11
BP	GO:0036151	phosphatidylcholine acyl-chain remodeling	11/2907	29/18866	0.00265914	0.0282844	0.0230099	100137049/255043/79888/151056/10162/129642/8398/79887/11145/8605/5320	11
BP	GO:0043032	positive regulation of macrophage activation	11/2907	29/18866	0.00265914	0.0282844	0.0230099	3566/120892/1075/79155/4317/3586/6348/84868/7057/9173/7099	11
BP	GO:0006476	protein deacetylation	26/2907	97/18866	0.00267592	0.0282844	0.0230099	65018/51547/22933/10467/25855/604/122953/83933/23410/79885/56848/51548/8841/25865/26993/4287/10943/1487/120892/7422/10014/9759/6720/10474/51043/3458	26
BP	GO:0030516	regulation of axon extension	26/2907	97/18866	0.00267592	0.0282844	0.0230099	3611/81565/28988/51330/1785/23011/10509/2664/2017/9175/10507/3475/7869/64218/8851/10501/7422/8766/4504/1020/8482/1627/5058/2335/348/4035	26
BP	GO:1990868	response to chemokine	26/2907	97/18866	0.00267592	0.0282844	0.0230099	3577/3579/643/11240/2859/2919/9034/1232/6351/5196/80149/9750/1240/5197/2532/10663/1236/6846/6358/6348/6352/6375/5967/5473/1230/6349	26
BP	GO:1990869	cellular response to chemokine	26/2907	97/18866	0.00267592	0.0282844	0.0230099	3577/3579/643/11240/2859/2919/9034/1232/6351/5196/80149/9750/1240/5197/2532/10663/1236/6846/6358/6348/6352/6375/5967/5473/1230/6349	26
BP	GO:1903532	positive regulation of secretion by cell	67/2907	313/18866	0.00275868	0.0291095	0.0236811	7494/5715/135/11267/65018/3134/27243/79971/11132/322/6717/6810/338442/57126/9146/3566/572/26253/65220/283/9854/6804/55691/23410/640/56848/5864/5608/50855/6622/8398/101/388581/7251/6453/5467/3661/5208/5025/8938/6386/2207/18/9619/56253/2268/929/56729/4282/51714/1020/3586/3684/2852/8754/43/5950/6288/1588/2752/3689/6696/7293/3458/7097/4035/7099	67
BP	GO:0051924	regulation of calcium ion transport	56/2907	253/18866	0.00276551	0.0291319	0.0236994	135/51763/7439/375346/825/54923/3603/5566/409/6717/5336/353514/5026/801/56848/2281/274/2859/8291/3958/6622/9914/8398/11027/2534/8787/2946/54106/10288/79041/1535/581/80024/5025/10681/8573/6546/6351/10859/5335/115352/126306/3383/4638/1020/55636/706/2539/2852/930/283229/6348/6352/6375/11151/1230	56
BP	GO:0051341	regulation of oxidoreductase activity	30/2907	117/18866	0.00277551	0.0291876	0.0237447	51070/5447/3240/84334/10063/1785/11035/23410/801/56848/8639/6622/1535/56833/120892/5164/10295/207/4504/64127/9973/3001/7421/573971/23564/6521/5166/2208/3458/348	30
BP	GO:0044275	cellular carbohydrate catabolic process	15/2907	46/18866	0.00279743	0.0293682	0.0238917	2710/5223/5261/79660/8972/2931/26007/801/5837/5256/5236/5836/5509/2548/313	15
BP	GO:0033157	regulation of intracellular protein transport	58/2907	264/18866	0.00280685	0.0294174	0.0239316	51009/51763/65018/5296/81565/51547/4946/27113/54828/5566/27429/9270/208/4947/8536/285966/6672/55072/2039/572/637/59286/7323/5494/2931/118424/56947/2664/23368/9520/8841/26993/2534/3305/22885/2064/3002/120892/3059/975/1263/3753/51024/3429/80149/4641/8851/8692/347/6720/1020/51100/3684/9531/5058/3689/2010/3458	58
BP	GO:0019216	regulation of lipid metabolic process	88/2907	431/18866	0.00293805	0.0307403	0.0250079	8897/11277/2874/133/5296/5447/84649/29095/1595/2358/440503/6256/6901/51099/26580/10273/4598/60343/338442/208/634/2180/4802/6604/4597/80183/2954/100287171/79888/23410/2224/2053/56848/80025/8877/8841/10162/23533/26230/64788/27122/8398/94103/85441/5467/10577/2181/975/255919/51094/154791/5164/207/8651/113791/718/9619/2268/2274/50486/347/64127/6720/1066/51/706/1236/7421/3248/26119/2852/20/930/6095/902…	88
BP	GO:0050864	regulation of B cell activation	45/2907	195/18866	0.00300269	0.0313636	0.025515	7494/28639/2213/3537/10459/572/604/374403/640/11314/8741/933/939/54106/23495/958/56833/683/388077/149840/975/677/28638/30009/115352/79155/4282/64127/51293/7305/28526/3586/115650/940/930/64092/57162/150372/28473/7293/84433/4332/100423062/7099/28452	45
BP	GO:0098927	vesicle-mediated transport between endosomal compartments	14/2907	42/18866	0.00304388	0.0314439	0.0255802	11267/8678/374666/64400/9482/5595/5289/5605/29911/23011/83547/51652/404636/11151	14
BP	GO:0002604	regulation of dendritic cell antigen processing and presentation	6/2907	11/18866	0.00305098	0.0314439	0.0255802	968/6556/2213/64127/1236/7057	6
BP	GO:0010918	positive regulation of mitochondrial membrane potential	6/2907	11/18866	0.00305098	0.0314439	0.0255802	205251/208/572/637/207/8115	6
BP	GO:0035747	natural killer cell chemotaxis	6/2907	11/18866	0.00305098	0.0314439	0.0255802	22914/6351/100528032/6348/6352/6375	6
BP	GO:0051673	membrane disruption in other organism	6/2907	11/18866	0.00305098	0.0314439	0.0255802	1667/728358/79792/1668/4057/1669	6
BP	GO:0090084	negative regulation of inclusion body assembly	6/2907	11/18866	0.00305098	0.0314439	0.0255802	3300/3303/10049/3304/3337/55466	6
BP	GO:0098883	synapse pruning	6/2907	11/18866	0.00305098	0.0314439	0.0255802	718/1020/713/3684/712/714	6
BP	GO:2000551	regulation of T-helper 2 cell cytokine production	6/2907	11/18866	0.00305098	0.0314439	0.0255802	5590/383/975/30009/2625/6375	6
BP	GO:0006497	protein lipidation	25/2907	93/18866	0.00306483	0.0314819	0.0256112	11152/65258/55062/84243/81926/5289/26100/5279/51304/51227/5494/5283/9140/100996939/2629/58515/131540/10533/64840/54344/8818/9091/84885/7357/2752	25
BP	GO:0051702	interaction with symbiont	25/2907	93/18866	0.00306483	0.0314819	0.0256112	8812/51763/1667/728358/9218/383/820/1072/3482/5091/9150/10910/51176/3429/6351/5196/80149/302/4057/11334/2335/6348/6352/358/348	25
BP	GO:0042158	lipoprotein biosynthetic process	26/2907	98/18866	0.00311861	0.0319813	0.0260174	11152/65258/55062/84243/81926/5289/26100/5279/51304/51227/5494/5283/9140/100996939/2629/58515/131540/10533/64840/54344/8818/9091/84885/7357/2752/348	26
BP	GO:0070230	positive regulation of lymphocyte apoptotic process	8/2907	18/18866	0.00322043	0.0329708	0.0268224	27166/101/581/29126/3586/3965/5133/6352	8
BP	GO:0002262	myeloid cell homeostasis	37/2907	154/18866	0.0033035	0.0337204	0.0274323	10296/60682/3579/23210/338442/2039/604/3303/567/3162/2038/581/3059/677/10018/3304/2207/212/2034/116151/669/7422/4151/6688/2539/6223/3050/6886/9636/2625/1777/6521/2623/51327/2113/10661/9935	37
BP	GO:0007032	endosome organization	22/2907	79/18866	0.00330998	0.0337204	0.0274323	29082/11267/374666/55111/64400/27243/5289/8878/51160/9146/93343/29911/9798/79720/23023/83547/79156/7251/51652/55361/8766/356	22
BP	GO:0043462	regulation of ATPase activity	22/2907	79/18866	0.00330998	0.0337204	0.0274323	3300/2968/11345/8775/7168/4635/5864/10049/5359/2966/4607/6742/4057/51025/7134/7139/7140/3337/4634/3434/7169/229	22
BP	GO:0036293	response to decreased oxygen levels	77/2907	371/18866	0.00333862	0.0339564	0.0276242	112398/5715/133/5700/5719/65018/22933/5683/10135/5687/5698/8837/3163/7311/5300/10273/7316/572/6921/4049/283/5699/64428/114769/112399/8996/9520/4204/5710/101/3162/29988/57085/1410/1535/5467/5894/677/1263/6546/51024/5066/1803/9491/207/27087/100133941/9861/212/18/2034/7422/3383/4504/26355/4151/54541/5351/5728/5721/6923/1027/3778/6513/10397/5058/6095/5967/7057/358/360/1471/7314/2113/2168/29923/7097	77
BP	GO:0048247	lymphocyte chemotaxis	19/2907	65/18866	0.00339904	0.0345142	0.028078	58191/1667/728358/22914/11240/8740/51192/101/80024/6351/100528032/80270/6846/6358/6348/6352/6375/6288/6349	19
BP	GO:0046209	nitric oxide metabolic process	23/2907	84/18866	0.00342262	0.0346967	0.0282265	2644/5447/3043/22914/1785/54/1191/5025/80149/207/64581/100528032/4317/3383/706/3586/23564/6095/1545/3689/3458/7097/7099	23
BP	GO:0070585	protein localization to mitochondrion	35/2907	144/18866	0.00343048	0.0347196	0.0282451	51079/65018/10245/728489/27113/130916/27429/55072/572/637/59286/7323/2931/118424/80273/56947/92609/23368/9520/401505/25793/3305/22885/3002/581/120892/51024/207/10018/51025/6720/706/51100/9531/1649	35
BP	GO:0018212	peptidyl-tyrosine modification	78/2907	377/18866	0.00343645	0.0347232	0.0282481	1198/84619/9094/9467/8798/8576/653361/23568/5595/4739/9625/5590/9961/409/5605/353514/5606/5526/80851/2039/9244/8764/2209/2041/7297/660/640/6503/8459/11314/5608/2047/10507/3932/3084/57732/2534/780/958/7251/2064/3600/11009/3280/7039/683/3059/3702/975/916/8460/3055/8651/100133941/6423/7535/8692/2268/83666/7422/10188/3383/4282/5008/8784/6886/64092/9021/6352/2050/3690/5795/1942/3689/2623/4145/3458/3976	78
BP	GO:0032635	interleukin-6 production	40/2907	170/18866	0.00345129	0.0347658	0.0282827	7494/5603/91966/8807/27202/5004/3603/4155/409/353514/56848/64343/3106/2629/11027/54106/10288/1535/10417/5450/6504/80149/671/2207/64581/8692/4317/64127/7096/7305/29108/91662/3586/3965/84868/51311/388325/3458/7097/7099	40
BP	GO:0034284	response to monosaccharide	47/2907	207/18866	0.00345188	0.0347658	0.0282827	7494/4704/4087/4831/10135/8892/5566/6717/6810/65010/572/65220/2029/9854/2281/23098/8398/388581/1535/5467/5208/5894/10533/6546/8938/5798/51024/2081/5127/26056/1292/3383/51714/83667/51092/56943/6720/415116/5728/10804/1027/2852/7057/2752/6678/4035/336	47
BP	GO:0016242	negative regulation of macroautophagy	12/2907	34/18866	0.00347906	0.034926	0.028413	29082/65018/27429/9554/3162/79142/120892/9638/207/4864/5768/26471	12
BP	GO:0055094	response to lipoprotein particle	12/2907	34/18866	0.00347906	0.034926	0.028413	968/84830/975/207/2207/4864/1066/5468/3689/928/348/7099	12
BP	GO:0035722	interleukin-12-mediated signaling pathway	15/2907	47/18866	0.00353292	0.0352968	0.0287147	654483/6648/552900/5908/7297/1072/302/6775/4282/3594/1265/3586/5721/759/3458	15
BP	GO:0002712	regulation of B cell mediated immunity	17/2907	56/18866	0.00354199	0.0352968	0.0287147	2213/10459/604/4049/8741/958/10666/1378/149840/30009/2207/718/3586/940/722/6375/2208	17
BP	GO:0002889	regulation of immunoglobulin mediated immune response	17/2907	56/18866	0.00354199	0.0352968	0.0287147	2213/10459/604/4049/8741/958/10666/1378/149840/30009/2207/718/3586/940/722/6375/2208	17
BP	GO:0005980	glycogen catabolic process	9/2907	22/18866	0.00355589	0.0352968	0.0287147	5261/79660/801/5837/5256/5236/5836/5509/2548	9
BP	GO:0045061	thymic T cell selection	9/2907	22/18866	0.00355589	0.0352968	0.0287147	6794/916/7535/917/1236/2625/940/915/84433	9
BP	GO:0045980	negative regulation of nucleotide metabolic process	9/2907	22/18866	0.00355589	0.0352968	0.0287147	201163/51548/978/9759/54541/26471/55022/2203/6521	9
BP	GO:0072576	liver morphogenesis	9/2907	22/18866	0.00355589	0.0352968	0.0287147	7494/8837/55679/634/1051/6195/8452/55959/2735	9
BP	GO:0009746	response to hexose	46/2907	202/18866	0.00356667	0.0353471	0.0287556	7494/4704/4087/4831/10135/8892/5566/6717/6810/65010/572/65220/2029/9854/2281/23098/8398/388581/1535/5467/5208/5894/10533/6546/8938/5798/51024/2081/5127/26056/1292/3383/51714/83667/51092/56943/6720/415116/5728/10804/1027/2852/7057/2752/4035/336	46
BP	GO:0034101	erythrocyte homeostasis	32/2907	129/18866	0.00358109	0.0354334	0.0288258	10296/60682/23210/2039/604/3303/567/3162/2038/3059/677/3304/212/2034/116151/669/7422/4151/6688/2539/6223/3050/6886/9636/2625/1777/6521/2623/51327/2113/10661/9935	32
BP	GO:0010758	regulation of macrophage chemotaxis	11/2907	30/18866	0.00362169	0.0356642	0.0290135	1652/5595/728/56833/4485/1240/4282/6352/7057/1588/719	11
BP	GO:0036258	multivesicular body assembly	11/2907	30/18866	0.00362169	0.0356642	0.0290135	29082/11267/27243/51160/9146/93343/9798/79720/7251/51652/8766	11
BP	GO:0060142	regulation of syncytium formation by plasma membrane fusion	11/2907	30/18866	0.00362169	0.0356642	0.0290135	8837/10938/2323/8536/10211/3566/8740/9750/7305/8754/9518	11
BP	GO:0031579	membrane raft organization	10/2907	26/18866	0.00366566	0.0359827	0.0292727	1201/10211/4118/10347/302/4864/914/2934/6281/2319	10
BP	GO:0031664	regulation of lipopolysaccharide-mediated signaling pathway	10/2907	26/18866	0.00366566	0.0359827	0.0292727	114769/1604/4795/11027/4057/4282/59307/23643/388325/7001	10
BP	GO:0042113	B cell activation	69/2907	328/18866	0.00376149	0.036865	0.0299905	7494/2874/79840/222487/28639/2213/3537/643/5336/10459/572/604/374403/602/640/11314/8741/10312/23308/933/7163/939/54106/23495/958/56833/581/683/388077/149840/975/51176/677/28638/30009/5450/115352/7535/10538/79155/10014/931/9759/4282/64127/51293/7305/28526/3586/3955/115650/959/973/940/115350/930/64092/974/5795/3575/57162/150372/28473/7293/84433/4332/100423062/7099/28452	69
BP	GO:0033013	tetrapyrrole metabolic process	18/2907	61/18866	0.00384264	0.0375415	0.0305408	3163/10058/11330/51629/326625/3162/6947/7390/645/212/5498/51293/706/644/3145/5644/440387/6948	18
BP	GO:0045576	mast cell activation	18/2907	61/18866	0.00384264	0.0375415	0.0305408	27040/6813/3566/640/56848/11314/5359/6284/3162/10666/6283/399/2207/8773/2268/3937/3965/10397	18
BP	GO:0030307	positive regulation of cell growth	40/2907	171/18866	0.00384914	0.0375458	0.0305443	3611/51009/81565/28988/58191/3020/5300/51330/114804/9798/3021/2664/23327/9175/8877/84717/10507/54512/57699/2064/6280/1535/1382/2137/51176/4092/6386/207/6195/6423/7422/8766/6279/8482/1627/5058/2335/5967/4035/5645	40
BP	GO:0050856	regulation of T cell receptor signaling pathway	14/2907	43/18866	0.00388363	0.0378227	0.0307695	634/79037/11314/25865/3958/3932/10666/11006/975/2633/53347/1236/5795/84433	14
BP	GO:0051056	regulation of small GTPase mediated signal transduction	68/2907	323/18866	0.0039243	0.0381588	0.0310429	8859/10156/5296/54509/23370/64333/8878/9649/100271927/5662/23092/10211/253980/83478/1785/51571/10144/9266/604/64787/389/26037/201163/55843/64411/116985/2664/22898/23550/57568/26230/2859/3084/89846/23380/6993/221002/6453/83892/89941/54869/5894/9267/9138/55738/27128/221472/399/9322/9750/9938/9922/56882/9448/29/2057/8452/23365/121512/23526/8477/9826/5909/115727/2203/345/348/9289	68
BP	GO:0048284	organelle fusion	34/2907	140/18866	0.00393796	0.0382315	0.0311022	1201/9570/9482/6810/208/116841/6809/80183/6804/6687/56947/9554/55647/2027/5864/8877/8291/6622/6890/8677/64601/51652/581/23355/51024/302/84286/8773/10490/2026/6891/55022/8417/11151	34
BP	GO:0071622	regulation of granulocyte chemotaxis	16/2907	52/18866	0.00396424	0.0384265	0.0312607	23604/3579/27202/5595/8291/728/4354/683/1803/9750/1240/1236/6352/6375/7057/719	16
BP	GO:0007162	negative regulation of cell adhesion	64/2907	301/18866	0.00397146	0.0384363	0.0312687	135/2213/4155/54828/9270/3557/8379/634/10459/2039/3566/383/6904/7045/604/8764/3659/11314/654346/3958/10507/3142/1051/5598/2064/10288/84830/64115/8573/4092/201633/30009/80149/10859/29126/207/1840/8651/5362/9750/10154/18/2633/56253/7422/347/10653/9448/284194/3586/5728/3965/10457/3902/6375/51043/84868/7057/1545/57162/928/11326/7001/4035	64
BP	GO:0046474	glycerophospholipid biosynthetic process	51/2907	230/18866	0.00399126	0.0385677	0.0313756	57048/1120/8897/1201/65258/51763/1460/5296/10809/100137049/162466/2358/6901/5289/51099/5279/137964/5336/1606/51227/5338/51205/59338/5283/56994/9489/79888/660/100996939/57153/10162/5359/23533/8398/5833/64419/2181/5130/10423/55361/58488/8605/54344/8818/5728/79143/9091/84803/43/5320/336	51
BP	GO:0006006	glucose metabolic process	48/2907	214/18866	0.00405023	0.0390765	0.0317896	51763/10296/51547/84649/5223/5261/60343/79660/208/226/572/230/1390/5213/80183/2931/2027/388581/7033/5091/3101/5467/5208/4485/51094/5164/207/669/4938/2026/347/83667/130589/51181/5236/5443/2539/8277/57001/23178/6095/5224/5509/5950/2203/5166/2548/229	48
BP	GO:0048207	vesicle targeting, rough ER to cis-Golgi	19/2907	66/18866	0.00409657	0.0394008	0.0320534	51399/126003/1453/51693/9570/8775/2153/5265/9554/149111/10016/1294/27095/2157/64689/7039/966/1075/8452	19
BP	GO:0048208	COPII vesicle coating	19/2907	66/18866	0.00409657	0.0394008	0.0320534	51399/126003/1453/51693/9570/8775/2153/5265/9554/149111/10016/1294/27095/2157/64689/7039/966/1075/8452	19
BP	GO:0045047	protein targeting to ER	30/2907	120/18866	0.00415585	0.039909	0.0324668	29082/6029/5372/9789/28972/130617/7311/6235/6728/6158/5373/6203/6157/6137/6142/23480/6168/9045/6139/6134/6234/6209/6141/6223/6169/6167/6173/6171/378706/6210	30
BP	GO:0050848	regulation of calcium-mediated signaling	26/2907	100/18866	0.00419139	0.0399563	0.0325053	23261/375346/5566/6717/374403/5026/801/2281/3084/58515/933/2946/51643/5598/683/5025/120892/5164/6351/916/7535/126306/1240/2633/2274/6348	26
BP	GO:1903960	negative regulation of anion transmembrane transport	7/2907	15/18866	0.00419764	0.0399563	0.0325053	124935/208/285966/338440/207/5997/7057	7
BP	GO:2000402	negative regulation of lymphocyte migration	7/2907	15/18866	0.00419764	0.0399563	0.0325053	22914/11240/84830/207/9750/100528032/347	7
BP	GO:2001044	regulation of integrin-mediated signaling pathway	7/2907	15/18866	0.00419764	0.0399563	0.0325053	9270/57126/55679/2039/967/683/7076	7
BP	GO:0006900	vesicle budding from membrane	28/2907	110/18866	0.00420346	0.0399563	0.0325053	29082/51399/126003/1453/51693/9570/4600/9217/8775/9218/1785/2153/5265/9554/83547/149111/10016/1294/27095/2157/64689/7039/966/302/1075/4599/8452/6281	28
BP	GO:0048259	regulation of receptor-mediated endocytosis	27/2907	105/18866	0.00420593	0.0399563	0.0325053	9094/60682/4043/409/5336/10211/1785/23011/567/54550/967/1191/160/8650/9026/6386/302/718/7422/10188/55589/84058/26119/20/3690/341/345	27
BP	GO:0097006	regulation of plasma lipoprotein particle levels	27/2907	105/18866	0.00420593	0.0399563	0.0325053	84649/10938/5566/4043/10162/10330/64788/8694/3162/10347/160/10577/2181/302/1175/9619/4864/7941/4481/55911/26119/5320/213/341/345/348/336	27
BP	GO:0045022	early endosome to late endosome transport	13/2907	39/18866	0.00423347	0.0401564	0.0326681	11267/8678/374666/64400/9482/5595/5289/5605/29911/23011/83547/51652/404636	13
BP	GO:0008643	carbohydrate transport	36/2907	151/18866	0.00425346	0.0402843	0.0327721	53916/51763/10237/366/57210/84255/11132/208/65010/79058/2931/51548/66035/29988/388581/6515/6253/5467/207/89872/718/5906/83667/219855/6513/55022/200010/11182/55600/388931/358/5473/144195/360/6272/2887	36
BP	GO:0042982	amyloid precursor protein metabolic process	20/2907	71/18866	0.00430639	0.0407234	0.0331293	1201/55851/5300/9445/2931/274/54550/1191/10347/27065/25825/9619/9911/26119/20/43/1942/3458/2319/348	20
BP	GO:0042743	hydrogen peroxide metabolic process	17/2907	57/18866	0.004336	0.0409408	0.0333062	3039/3040/65018/3043/3240/3049/3042/2878/3048/6622/2534/1535/4504/3050/3047/7001/3045	17
BP	GO:0043370	regulation of CD4-positive, alpha-beta T cell differentiation	15/2907	48/18866	0.00441947	0.0416654	0.0338957	5590/3566/604/5914/3142/4092/30009/246778/80149/8651/3594/3965/2625/51043/3458	15
BP	GO:0006986	response to unfolded protein	42/2907	183/18866	0.0044817	0.0421239	0.0342686	7494/3310/6818/51009/3300/445329/9570/55062/9114/100137049/9217/10273/5526/3338/2931/3303/118424/9797/10133/3305/57414/10987/7709/581/2137/55738/2081/10018/3304/3311/26270/153222/9709/285533/27129/9531/64061/7057/3337/1649/3315/871	42
BP	GO:0043433	negative regulation of DNA-binding transcription factor activity	42/2907	183/18866	0.0044817	0.0421239	0.0342686	222487/7114/409/6717/25855/6672/10459/11060/3399/307/4793/4795/3275/3162/150684/84166/54106/4294/3280/4092/80149/1240/9759/9447/57413/29108/8320/91662/3586/26471/84875/59307/55655/6375/84868/1545/55502/1649/57162/7293/7001/8553	42
BP	GO:0009135	purine nucleoside diphosphate metabolic process	33/2907	136/18866	0.00452184	0.0423725	0.0344709	11277/2987/5223/203/5210/226/5571/572/230/5213/2584/5209/2027/51548/4354/3101/5208/8573/8021/669/9759/2026/5236/54541/26471/11182/5224/2203/6521/131870/84433/229/3458	33
BP	GO:0009179	purine ribonucleoside diphosphate metabolic process	33/2907	136/18866	0.00452184	0.0423725	0.0344709	11277/2987/5223/203/5210/226/5571/572/230/5213/2584/5209/2027/51548/4354/3101/5208/8573/8021/669/9759/2026/5236/54541/26471/11182/5224/2203/6521/131870/84433/229/3458	33
BP	GO:0032509	endosome transport via multivesicular body sorting pathway	12/2907	35/18866	0.00456333	0.0425683	0.0346302	29082/11267/27243/80700/51160/93343/79720/83547/23484/51652/404636/6272	12
BP	GO:0032735	positive regulation of interleukin-12 production	12/2907	35/18866	0.00456333	0.0425683	0.0346302	3603/4050/54106/958/64581/1236/959/3965/388325/3458/7097/7099	12
BP	GO:0070371	ERK1 and ERK2 cascade	68/2907	325/18866	0.00456724	0.0425683	0.0346302	51231/6818/1652/445329/27202/2358/8837/5595/5590/5300/409/1512/4835/9270/5605/10318/634/5908/374403/201163/171389/23410/25865/1116/57447/2047/54550/728/10636/2064/10347/677/8685/6504/6351/7078/151306/2633/5906/3383/4282/4504/64127/152007/29108/91662/5728/1236/8482/3965/10457/6846/2852/6358/2335/6348/6352/5320/6375/84868/1230/388325/6237/6349/3976/348/4035/7099	68
BP	GO:0051656	establishment of organelle localization	87/2907	432/18866	0.00457021	0.0425683	0.0346302	29082/8517/51399/1201/126003/27040/57234/150365/1453/8678/65018/51693/9570/55062/81565/6813/4600/10948/27243/10239/51112/8775/5590/7320/23224/6794/10540/2647/8379/1785/3566/2153/5265/55968/9554/640/5413/56848/5864/11314/6284/118426/10494/10312/10749/9696/149111/54820/7013/10016/1294/3162/4648/92558/6993/8825/27095/2157/4542/64689/89941/7039/387755/3993/120892/9638/966/4643/1075/4641/2207/8773/557…	87
BP	GO:0046879	hormone secretion	66/2907	314/18866	0.0046118	0.0428912	0.0348928	5715/133/4087/2867/23568/11132/406/140606/6717/6810/338442/3557/572/65220/2029/9854/6804/2778/23410/640/2281/777/10312/8398/388581/84300/6453/5467/240/80024/5208/5894/291/2865/8938/5798/5127/1803/26056/51167/18/8773/5906/56729/51714/51092/56943/6720/55636/415116/5008/8425/5443/6513/2852/23178/2625/6352/5950/1588/2752/6696/64855/3458/3976/4035	66
BP	GO:0051851	modulation by host of symbiont process	18/2907	62/18866	0.0046496	0.0431779	0.0351261	8812/51763/9218/1072/3482/5091/9150/10910/51176/3429/6351/80149/302/4057/6348/6352/358/348	18
BP	GO:0008154	actin polymerization or depolymerization	49/2907	221/18866	0.00471051	0.043678	0.0355329	79585/653440/374666/28988/10093/11078/7114/9051/51571/2039/10092/51734/23406/283/9645/89848/7408/100287171/2017/274/10458/10435/375307/1072/2314/10602/3059/51466/26999/9026/4641/3055/7111/81873/10095/3383/81553/342184/29108/1236/6840/2934/1627/64780/6710/22921/10677/11151/822	49
BP	GO:0051282	regulation of sequestering of calcium ion	30/2907	121/18866	0.00472879	0.0437166	0.0355643	825/54923/205251/5566/6717/5336/57192/8996/801/2281/3932/6622/2946/79041/1535/581/80024/6546/5335/126306/55636/356/1236/2852/255231/930/6348/6375/11151/1649	30
BP	GO:0120254	olefinic compound metabolic process	30/2907	121/18866	0.00472879	0.0437166	0.0355643	30/133/100137049/10948/147015/5595/4051/10005/2180/8854/1564/2053/27122/2946/66002/6715/240/6342/6916/8605/9536/1645/51/5730/10170/1545/1588/1646/247/2944	30
BP	GO:0006869	lipid transport	80/2907	393/18866	0.00478062	0.0438948	0.0357094	57048/2874/9885/1201/83985/80765/10809/1375/10948/28232/26207/366/27166/6256/140606/208/634/2180/9399/57655/8714/9854/200931/80820/55113/80148/10162/5608/5359/10998/8398/23780/26020/1191/11000/10347/5467/10577/5025/2181/80833/6342/338440/302/207/58488/23762/9619/1645/347/56729/4282/4864/1066/4481/706/5443/6513/55911/26119/2167/7357/20/5468/5320/388931/3690/5950/7057/1588/123/6521/341/6696/345/216…	80
BP	GO:0034440	lipid oxidation	28/2907	111/18866	0.00481257	0.0438948	0.0357094	30/2109/5447/1375/84649/440503/84129/208/10005/55825/55268/1666/5467/240/1632/23600/51094/6342/8309/207/347/7941/83667/51/5468/5166/247/2168	28
BP	GO:0098732	macromolecule deacylation	28/2907	111/18866	0.00481257	0.0438948	0.0357094	7920/65018/51547/22933/10467/81926/25855/604/122953/83933/23410/79885/56848/51548/8841/25865/26993/4287/10943/1487/120892/7422/10014/9759/6720/10474/51043/3458	28
BP	GO:0032011	ARF protein signal transduction	8/2907	19/18866	0.00481894	0.0438948	0.0357094	5662/9266/23550/9267/55738/27128/9922/9448	8
BP	GO:0032012	regulation of ARF protein signal transduction	8/2907	19/18866	0.00481894	0.0438948	0.0357094	5662/9266/23550/9267/55738/27128/9922/9448	8
BP	GO:0070233	negative regulation of T cell apoptotic process	8/2907	19/18866	0.00481894	0.0438948	0.0357094	171558/939/8772/57864/6352/1942/3575/1831	8
BP	GO:0150146	cell junction disassembly	8/2907	19/18866	0.00481894	0.0438948	0.0357094	718/9922/1020/713/9448/3684/712/714	8
BP	GO:1902176	negative regulation of oxidative stress-induced intrinsic apoptotic signaling pathway	8/2907	19/18866	0.00481894	0.0438948	0.0357094	6648/65018/27429/8996/5598/207/8876/3315	8
BP	GO:1990182	exosomal secretion	8/2907	19/18866	0.00481894	0.0438948	0.0357094	11267/27243/9146/7251/10987/6386/8766/3458	8
BP	GO:2000010	positive regulation of protein localization to cell surface	8/2907	19/18866	0.00481894	0.0438948	0.0357094	6810/6809/29098/919/10347/207/2207/7305	8
BP	GO:0006906	vesicle fusion	26/2907	101/18866	0.00483439	0.0439252	0.035734	1201/9570/9482/6810/208/116841/6809/80183/6804/9554/55647/5864/8877/8291/6622/6890/8677/64601/23355/302/84286/8773/10490/6891/8417/11151	26
BP	GO:0002828	regulation of type 2 immune response	11/2907	31/18866	0.00484354	0.0439252	0.035734	5590/3566/383/604/5914/3142/975/30009/64127/2625/6375	11
BP	GO:0036257	multivesicular body organization	11/2907	31/18866	0.00484354	0.0439252	0.035734	29082/11267/27243/51160/9146/93343/9798/79720/7251/51652/8766	11
BP	GO:0051346	negative regulation of hydrolase activity	94/2907	473/18866	0.0048868	0.0442527	0.0360005	2874/135/10156/2644/5447/4318/3700/8837/440503/1032/117584/5590/54828/409/4671/22914/720/8178/5266/2029/8740/5265/721/10542/114769/8996/56848/2281/831/274/10049/51035/3958/10507/79661/6622/27151/6590/7013/1294/5598/939/5504/1410/5329/5973/1378/94274/5894/120892/90853/51176/2873/9814/302/9491/207/27344/1476/399/4057/6195/6423/718/7078/54843/100528032/7422/51025/10188/4504/23307/7139/10653/56882/97…	94
BP	GO:0036498	IRE1-mediated unfolded protein response	19/2907	67/18866	0.00490834	0.0443828	0.0361064	7494/6818/445329/9570/55062/9114/100137049/9217/5526/2931/9797/10987/7709/581/2137/55738/2081/10018/64061	19
BP	GO:0038061	NIK/NF-kappaB signaling	42/2907	184/18866	0.00496129	0.0447963	0.0364427	3611/5715/6500/5700/5719/222487/5683/54923/5687/5698/7114/8717/9516/8740/5494/602/5699/11035/5531/8877/1116/4791/5710/5971/8809/939/54106/51094/80149/9491/207/9861/4317/929/64127/91662/5721/3965/11156/84868/7097/7099	42
BP	GO:0007006	mitochondrial membrane organization	34/2907	142/18866	0.00498968	0.0448203	0.0364622	440574/51079/65018/4580/10476/27113/6901/518/572/637/2931/3303/6687/92609/23368/23593/539/8834/9551/6993/125988/3002/89941/581/203245/400916/598/9026/10018/84266/516/514/521/513	34
BP	GO:0002825	regulation of T-helper 1 type immune response	10/2907	27/18866	0.00502908	0.0448203	0.0364622	6556/3566/3554/3142/8809/246778/3594/6375/84868/9173	10
BP	GO:0006735	NADH regeneration	10/2907	27/18866	0.00502908	0.0448203	0.0364622	5223/226/230/5213/2027/3101/669/2026/5224/229	10
BP	GO:0015985	energy coupled proton transport, down electrochemical gradient	10/2907	27/18866	0.00502908	0.0448203	0.0364622	10476/518/9605/539/9551/65990/516/514/521/513	10
BP	GO:0015986	ATP synthesis coupled proton transport	10/2907	27/18866	0.00502908	0.0448203	0.0364622	10476/518/9605/539/9551/65990/516/514/521/513	10
BP	GO:0032607	interferon-alpha production	10/2907	27/18866	0.00502908	0.0448203	0.0364622	11277/64343/54106/3661/3665/3586/84868/51311/23547/7099	10
BP	GO:0061621	canonical glycolysis	10/2907	27/18866	0.00502908	0.0448203	0.0364622	5223/226/230/5213/2027/3101/669/2026/5224/229	10
BP	GO:0061718	glucose catabolic process to pyruvate	10/2907	27/18866	0.00502908	0.0448203	0.0364622	5223/226/230/5213/2027/3101/669/2026/5224/229	10
BP	GO:1901623	regulation of lymphocyte chemotaxis	10/2907	27/18866	0.00502908	0.0448203	0.0364622	22914/11240/8740/80024/6351/100528032/6846/6348/6352/6375	10
BP	GO:0007035	vacuolar acidification	9/2907	23/18866	0.005053	0.0449043	0.0365306	1201/9114/6556/147007/155066/10312/535/1203/79641	9
BP	GO:0042026	protein refolding	9/2907	23/18866	0.005053	0.0449043	0.0365306	3310/3300/3303/567/2281/3305/3304/3311/55466	9
BP	GO:0010256	endomembrane system organization	93/2907	468/18866	0.00510836	0.0453312	0.0368778	29082/51608/57048/11267/9885/339122/1201/23345/23423/1453/374666/81565/221496/9659/55111/9519/55909/64400/27243/5595/3801/9217/51112/5289/54828/8878/11018/2580/51160/5520/2647/6810/5605/208/9146/10211/1760/93343/1785/128989/53407/29911/9798/55968/55113/79720/5864/10133/93099/274/10162/5359/9144/10458/23023/10494/8291/26993/83547/353376/79156/23136/1191/7251/6280/64689/79041/10347/51652/120892/255…	93
BP	GO:0007015	actin filament organization	87/2907	434/18866	0.00519511	0.0460351	0.0374505	79585/653440/51763/374666/54509/55909/28988/23370/10093/4739/11078/7114/7168/9270/9051/226/253980/10459/51571/2039/10092/51734/23406/283/5829/389/9645/89848/7408/2041/116985/100287171/2017/274/10458/3693/10435/375307/1072/4648/2314/4542/10602/87/3059/51466/26999/9026/4643/4641/3055/399/134549/7111/4082/9938/81873/10095/3383/57471/1901/81553/201191/83715/342184/29108/8452/10634/27295/1236/6840/470…	87
BP	GO:0016197	endosomal transport	53/2907	244/18866	0.005273	0.0463304	0.0376907	29082/653440/11267/84440/83874/10139/374666/9570/55111/27243/9185/80700/10938/7311/10043/8878/51160/2647/9146/93343/7316/374403/29886/26088/100287171/79720/80148/9907/23023/83547/8677/1203/7251/64601/6453/23484/27065/51652/120892/6642/79735/8938/84661/10490/23258/8766/79958/404636/55658/57533/10123/7314/6272	53
BP	GO:0061418	regulation of transcription from RNA polymerase II promoter in response to hypoxia	21/2907	77/18866	0.00527857	0.0463304	0.0376907	112398/5715/5700/5719/22933/5683/5687/5698/7311/7316/6921/5699/112399/5710/9491/9861/2034/7422/5721/6923/7314	21
BP	GO:0019079	viral genome replication	31/2907	127/18866	0.00528502	0.0463304	0.0376907	8812/3669/51763/10581/5094/9217/200315/9218/10450/8519/10318/60489/8638/10542/5359/6590/10410/1487/55337/3429/80149/4057/4938/10663/4599/84875/9636/940/6352/9582/3434	31
BP	GO:0030833	regulation of actin filament polymerization	40/2907	174/18866	0.00528547	0.0463304	0.0376907	653440/374666/28988/10093/11078/7114/51571/2039/10092/23406/89848/7408/100287171/2017/274/10458/10435/2314/10602/3059/51466/26999/9026/4641/3055/7111/81873/10095/3383/81553/342184/29108/1236/6840/2934/1627/6710/10677/11151/822	40
BP	GO:0002863	positive regulation of inflammatory response to antigenic stimulus	6/2907	12/18866	0.00531071	0.0463304	0.0376907	4049/975/2207/718/1236/940	6
BP	GO:0006465	signal peptide processing	6/2907	12/18866	0.00531071	0.0463304	0.0376907	9789/28972/81502/90701/1203/23478	6
BP	GO:0032490	detection of molecule of bacterial origin	6/2907	12/18866	0.00531071	0.0463304	0.0376907	721/64127/7096/23643/7097/7099	6
BP	GO:0033700	phospholipid efflux	6/2907	12/18866	0.00531071	0.0463304	0.0376907	10347/9619/341/345/348/336	6
BP	GO:0034497	protein localization to phagophore assembly site	6/2907	12/18866	0.00531071	0.0463304	0.0376907	11152/55062/5289/26100/79065/285973	6
BP	GO:0042178	xenobiotic catabolic process	6/2907	12/18866	0.00531071	0.0463304	0.0376907	30/2180/2946/2948/2947/2944	6
BP	GO:0070269	pyroptosis	6/2907	12/18866	0.00531071	0.0463304	0.0376907	81030/4671/79792/55876/9447/58484	6
BP	GO:0006690	icosanoid metabolic process	30/2907	122/18866	0.00536667	0.0467527	0.0380343	7920/100137049/4259/5595/4051/2678/1564/2053/241/4056/66002/240/6916/2681/8605/9536/1645/4282/51/4048/3248/5730/64174/1545/1646/1357/247/10394/7097/2944	30
BP	GO:0045058	T cell selection	15/2907	49/18866	0.00547872	0.0475949	0.0387194	6794/4063/3600/30009/916/7535/10538/3594/917/1514/1236/2625/940/915/84433	15
BP	GO:0071349	cellular response to interleukin-12	15/2907	49/18866	0.00547872	0.0475949	0.0387194	654483/6648/552900/5908/7297/1072/302/6775/4282/3594/1265/3586/5721/759/3458	15
BP	GO:0005976	polysaccharide metabolic process	28/2907	112/18866	0.00549391	0.0476601	0.0387724	8509/51763/5261/2131/79660/208/80183/1118/8972/2931/801/5504/160/5837/2992/374907/56548/207/83931/5256/5236/5443/23178/55790/5836/5509/2548/313	28
BP	GO:0035601	protein deacylation	27/2907	107/18866	0.00553503	0.0478198	0.0389024	65018/51547/22933/10467/81926/25855/604/122953/83933/23410/79885/56848/51548/8841/25865/26993/4287/10943/1487/120892/7422/10014/9759/6720/10474/51043/3458	27
BP	GO:0090174	organelle membrane fusion	27/2907	107/18866	0.00553503	0.0478198	0.0389024	1201/9570/9482/6810/208/116841/6809/80183/6804/9554/55647/5864/8877/8291/6622/6890/8677/64601/51652/23355/302/84286/8773/10490/6891/8417/11151	27
BP	GO:0045582	positive regulation of T cell differentiation	24/2907	92/18866	0.00553548	0.0478198	0.0389024	7494/5590/3566/572/604/5914/101/3142/939/10288/11006/64115/9092/51176/8651/399/7535/3594/8876/3965/2625/51043/3575/3458	24
BP	GO:0051098	regulation of binding	75/2907	367/18866	0.00556633	0.0480193	0.0390647	6881/8663/4087/3300/1460/4318/64400/22933/22924/5595/7114/5566/4043/5300/409/6717/10273/9270/8536/10211/6672/10459/6604/24144/8932/9236/22927/602/10542/567/5914/114769/7122/81857/6590/3162/1203/23639/5329/3280/5986/6788/581/120892/51176/9026/302/207/9750/83666/4317/10014/9759/9775/1020/23641/166/3586/3955/3001/26119/3433/2625/5468/149628/6281/5899/1649/2623/3434/64855/3458/3976/348/4035	75
BP	GO:0008286	insulin receptor signaling pathway	34/2907	143/18866	0.00559863	0.0482307	0.0392367	51763/527/5296/81565/9114/5590/51382/208/10603/2931/533/155066/4303/10458/10312/529/535/29988/388581/896/2865/51094/5164/207/8651/2529/526/6720/55022/5058/9021/51043/5166/2887	34
BP	GO:0060759	regulation of response to cytokine stimulus	44/2907	196/18866	0.00564476	0.0485606	0.039505	8517/11277/2874/81030/117584/837/8717/3557/55072/7850/11240/383/3303/114769/8877/353376/3554/84166/5598/8772/7185/84888/3661/8651/100133941/3460/3304/81858/834/8970/83666/3665/246330/29108/153222/166/59307/9021/5468/6352/100130733/3458/7097/7099	44
BP	GO:0015980	energy derivation by oxidation of organic compounds	59/2907	278/18866	0.00573706	0.0492716	0.0400835	11277/126328/4704/4701/6391/51079/374291/2109/51763/65018/4714/4696/4729/5261/54949/23479/27166/6901/2647/79660/208/4708/4728/1327/637/80183/201163/2931/2778/23410/801/4718/80025/1337/6389/4204/6622/10975/5504/6834/5837/4707/4695/2992/207/9167/83931/513/4504/5256/5236/5443/55022/23178/5836/5509/2548/1339/3458	59
BP	GO:0042593	glucose homeostasis	53/2907	245/18866	0.00574332	0.0492716	0.0400835	7494/57048/51763/5296/2867/4831/5547/5566/6794/6717/6810/55777/572/79058/65220/9854/4303/2281/51548/8398/388581/3101/1535/240/80024/5894/51094/8938/5798/51024/5164/2081/25825/5127/10295/207/26056/51167/4938/3383/51714/83667/51092/56943/415116/5443/10804/2852/5836/5468/5950/5166/4035	53
BP	GO:0032675	regulation of interleukin-6 production	37/2907	159/18866	0.00578025	0.0495199	0.0402854	7494/5603/91966/27202/5004/3603/4155/409/353514/3106/2629/11027/54106/10288/1535/10417/5450/6504/80149/671/2207/64581/8692/4317/64127/7096/7305/29108/91662/3586/3965/84868/51311/388325/3458/7097/7099	37
BP	GO:0006631	fatty acid metabolic process	80/2907	396/18866	0.00583846	0.0498806	0.0405789	7920/7494/30/11277/2109/5447/1375/100137049/84649/5595/440503/4051/84129/51099/137964/208/2678/10005/5571/634/2180/55825/1390/2954/1564/55268/2053/241/80025/10998/387521/4056/2946/66002/1666/23305/11000/2948/5467/240/2181/84830/1632/23600/51094/9524/5164/6342/5066/6916/8309/207/8605/84266/718/51390/3995/9536/1645/4282/83667/79746/6720/1066/51/80221/55301/4048/3248/5730/5468/1545/1646/341/5166/247…	80
BP	GO:0010959	regulation of metal ion transport	80/2907	396/18866	0.00583846	0.0498806	0.0405789	135/51763/7439/375346/825/54923/3603/23479/5566/409/6717/5336/353514/1760/1785/11060/1318/29098/567/5026/2745/23327/6324/801/56848/2281/274/2859/8291/3958/53826/6622/967/9914/8398/11027/2534/8787/150684/2946/54106/10288/79041/1535/581/80024/5025/10681/8573/3753/6546/6351/10859/207/5335/53822/115352/126306/54997/3383/4638/3759/1020/55636/5348/706/3784/5728/2258/2539/2852/930/283229/6348/102723475/…	80
CC	GO:0042581	specific granule	78/3048	160/19559	6.18553e-23	4.58966e-20	3.73736e-20	30/1084/8907/222487/6813/64386/8993/5004/3240/2358/3163/311/25797/81619/51382/10043/306/4758/121260/6810/57126/8566/634/3934/383/6809/2352/1118/79792/54472/567/820/116844/57153/2204/1774/53831/1116/10855/2919/6590/8694/101/6515/94103/5329/10321/1535/28956/199675/683/5199/6947/966/10970/10562/11322/4057/6793/671/8773/1669/338339/5906/4317/56729/5768/1265/7133/3684/5005/1088/5795/126014/4973/3689/1…	78
CC	GO:0034774	secretory granule lumen	120/3048	322/19559	1.01844e-21	2.52895e-19	2.05932e-19	30/3310/5719/1460/4831/3700/6286/8993/28988/5683/5004/5223/3240/1667/8635/728358/1/25797/7114/51368/9961/64333/4758/1512/10450/29099/8566/226/2512/3934/51571/11240/383/10092/230/23406/2153/2352/5265/9798/1118/79792/54472/567/79169/820/116844/1774/1116/7123/23593/978/10855/83716/1668/2588/2919/6590/6993/2157/1191/6280/3101/10321/240/6283/10577/87/5199/10533/6947/81567/6282/2992/6386/5196/2219/302/…	120
CC	GO:0060205	cytoplasmic vesicle lumen	121/3048	326/19559	1.02249e-21	2.52895e-19	2.05932e-19	30/3310/5719/1460/4831/3700/6286/8993/28988/5683/5004/5223/3240/1667/8635/728358/1/25797/7114/51368/9961/64333/4758/1512/10450/29099/8566/226/2512/3934/51571/11240/383/10092/230/23406/2153/2352/5265/9798/1118/79792/54472/567/79169/820/116844/1774/1116/7123/23593/978/10855/83716/1668/2588/2919/6590/6993/2157/1191/6280/3101/10321/240/6283/10577/87/5199/10533/6947/81567/6282/2992/6386/5196/2219/302/…	121
CC	GO:0031983	vesicle lumen	121/3048	328/19559	1.85639e-21	3.25769e-19	2.65274e-19	30/3310/5719/1460/4831/3700/6286/8993/28988/5683/5004/5223/3240/1667/8635/728358/1/25797/7114/51368/9961/64333/4758/1512/10450/29099/8566/226/2512/3934/51571/11240/383/10092/230/23406/2153/2352/5265/9798/1118/79792/54472/567/79169/820/116844/1774/1116/7123/23593/978/10855/83716/1668/2588/2919/6590/6993/2157/1191/6280/3101/10321/240/6283/10577/87/5199/10533/6947/81567/6282/2992/6386/5196/2219/302/…	121
CC	GO:0070820	tertiary granule	77/3048	164/19559	2.19521e-21	3.25769e-19	2.65274e-19	527/2495/4318/6813/8993/28988/3043/6556/84418/5004/2357/3240/2358/25797/8778/5547/81619/1512/57126/226/634/230/374403/2352/1118/79792/8972/7130/567/820/116844/1604/2204/84658/11314/53831/978/3958/10312/2919/3687/535/101/6515/10288/10321/1535/28956/1378/199675/5199/6947/966/1476/10562/11322/4057/2207/8773/338339/4317/5768/79930/5236/1265/4048/3684/8417/1088/126014/4973/5473/3689/1471/2548/10004958…	77
CC	GO:0030667	secretory granule membrane	109/3048	306/19559	3.77146e-18	4.66403e-16	3.79792e-16	968/25798/1084/3577/53916/2215/8907/527/11025/53917/222487/54509/6813/64386/3579/6556/84418/2357/2358/3163/8778/5547/81619/51382/10043/9218/6717/121260/51706/4311/2212/762/57126/634/11336/6809/5908/374403/8972/79888/10326/1604/4718/57153/2204/5864/84658/11314/53831/3958/3106/10312/6622/967/353376/8694/728/3687/535/101/3482/259215/6515/94103/5329/10288/1535/28956/1378/199675/683/966/10970/5066/845…	109
CC	GO:1904724	tertiary granule lumen	35/3048	55/19559	9.20921e-16	9.76177e-14	7.94901e-14	2495/4318/8993/28988/3043/5004/3240/25797/1512/226/230/2352/1118/79792/7130/567/820/116844/978/2919/10321/5199/6947/1476/10562/4057/4317/5768/5236/1265/4048/126014/5473/1471/10394	35
CC	GO:0005774	vacuolar membrane	128/3048	427/19559	2.78374e-14	2.58192e-12	2.10246e-12	968/11337/25798/51622/55340/1201/221960/83985/8907/51296/527/55062/9114/3134/10948/7942/147007/11345/2357/79036/9482/10548/284129/54785/1889/8775/80700/5547/7311/51382/25851/10043/51368/9218/4758/9528/121260/2647/220002/51257/389541/56834/9516/64121/10211/23710/10058/9842/84557/5908/7056/729991/57535/80183/643246/81631/2783/65082/57192/201163/533/10542/79888/112770/4718/57153/56848/285973/118426/…	128
CC	GO:0035580	specific granule lumen	35/3048	62/19559	1.63924e-13	1.35147e-11	1.1005e-11	30/8993/5004/3240/25797/4758/8566/3934/383/2352/1118/79792/54472/567/820/116844/1774/1116/10855/2919/6590/10321/5199/6947/10562/4057/671/1669/4317/56729/5768/1265/5005/126014/10394	35
CC	GO:0101002	ficolin-1-rich granule	50/3048	124/19559	2.62424e-11	1.77017e-09	1.44145e-09	3310/5719/2495/1460/4318/56888/4831/28988/5683/3043/5223/1/25797/9961/1512/10450/29099/226/10092/230/23406/5265/79792/3303/7130/79169/116844/978/83716/6993/3848/3101/240/10533/2992/2219/1476/9861/3304/80301/4282/5236/3614/4048/2934/1508/5836/1471/4332/5553	50
CC	GO:1904813	ficolin-1-rich granule lumen	50/3048	124/19559	2.62424e-11	1.77017e-09	1.44145e-09	3310/5719/2495/1460/4318/56888/4831/28988/5683/3043/5223/1/25797/9961/1512/10450/29099/226/10092/230/23406/5265/79792/3303/7130/79169/116844/978/83716/6993/3848/3101/240/10533/2992/2219/1476/9861/3304/80301/4282/5236/3614/4048/2934/1508/5836/1471/4332/5553	50
CC	GO:0045335	phagocytic vesicle	54/3048	140/19559	3.28989e-11	2.03425e-09	1.65649e-09	339122/527/9114/3134/6813/8993/653361/6556/9482/311/5289/306/6810/1785/57192/533/567/155066/9554/55647/9140/3693/10435/3106/10312/6890/83547/535/23380/101/54106/10578/752/1535/51466/55529/4688/4641/26056/3107/4057/8773/5906/8766/64127/7096/6891/3105/11031/2934/4689/11151/388325/7097	54
CC	GO:0042101	T cell receptor complex	53/3048	140/19559	1.13329e-10	6.46849e-09	5.26729e-09	28639/634/919/926/28558/923/28638/925/28614/8631/916/7535/28568/28569/28619/28620/28677/28606/28689/28691/28670/28673/28672/28755/28671/28685/28526/917/28684/28680/28581/28690/28664/28682/28666/28660/28674/28662/28669/28616/28586/28617/28563/28576/28557/28589/28692/28653/28573/28583/28518/915/28567	53
CC	GO:0030139	endocytic vesicle	93/3048	313/19559	1.59416e-10	8.44906e-09	6.88007e-09	3039/339122/84440/527/3040/53917/9114/3134/6813/8993/653361/3043/6556/3240/9482/79971/311/10938/7311/5289/306/409/6810/9170/1785/7316/2210/57192/533/2209/567/155066/9554/55647/9140/8877/10755/22905/3693/10435/8291/3106/10312/6890/83547/535/23380/101/3482/1212/54106/10578/752/6453/1535/160/51466/8685/55529/4688/4643/1175/1803/4641/26056/3107/4057/8773/8692/5906/8766/64127/7096/6891/4481/3105/9332/…	93
CC	GO:0005765	lysosomal membrane	106/3048	375/19559	2.18377e-10	1.01272e-08	8.2466e-09	968/25798/51622/55340/1201/221960/83985/8907/51296/527/9114/3134/10948/7942/2357/79036/9482/10548/284129/54785/1889/80700/5547/7311/51382/25851/10043/9218/4758/9528/121260/2647/220002/51257/389541/56834/9516/10211/9842/5908/729991/57535/2783/65082/57192/201163/10542/79888/112770/4718/57153/56848/118426/10855/53346/2629/10312/967/529/83547/58986/10410/535/29988/3482/79156/1203/92979/54106/64601/84…	106
CC	GO:0098852	lytic vacuole membrane	106/3048	375/19559	2.18377e-10	1.01272e-08	8.2466e-09	968/25798/51622/55340/1201/221960/83985/8907/51296/527/9114/3134/10948/7942/2357/79036/9482/10548/284129/54785/1889/80700/5547/7311/51382/25851/10043/9218/4758/9528/121260/2647/220002/51257/389541/56834/9516/10211/9842/5908/729991/57535/2783/65082/57192/201163/10542/79888/112770/4718/57153/56848/118426/10855/53346/2629/10312/967/529/83547/58986/10410/535/29988/3482/79156/1203/92979/54106/64601/84…	106
CC	GO:0005766	primary lysosome	56/3048	155/19559	2.77998e-10	1.14597e-08	9.33162e-09	968/25798/527/6813/2357/1667/8635/728358/311/5547/10043/9218/2512/11240/383/6809/5908/9798/54472/3073/79888/4718/23593/1668/2588/967/10577/81567/10970/6386/302/1075/671/25801/718/8773/1669/55313/410/93100/56729/29108/3614/23526/8876/8417/5005/3074/1088/4680/150372/2548/4332/7276/719/5645	56
CC	GO:0042582	azurophil granule	56/3048	155/19559	2.77998e-10	1.14597e-08	9.33162e-09	968/25798/527/6813/2357/1667/8635/728358/311/5547/10043/9218/2512/11240/383/6809/5908/9798/54472/3073/79888/4718/23593/1668/2588/967/10577/81567/10970/6386/302/1075/671/25801/718/8773/1669/55313/410/93100/56729/29108/3614/23526/8876/8417/5005/3074/1088/4680/150372/2548/4332/7276/719/5645	56
CC	GO:0035579	specific granule membrane	38/3048	91/19559	1.90486e-09	7.43896e-08	6.05755e-08	1084/8907/222487/64386/2358/3163/81619/51382/10043/121260/57126/634/57153/2204/53831/8694/101/6515/94103/5329/1535/28956/199675/683/966/10970/11322/6793/8773/338339/5906/7133/3684/1088/5795/4973/3689/719	38
CC	GO:0005776	autophagosome	38/3048	97/19559	1.58233e-08	5.87046e-07	4.78031e-07	11337/1201/23604/8678/2495/374666/55062/53917/11345/10548/5289/25851/51368/8878/79065/2512/23710/84557/57655/80183/643246/81631/65082/4210/100287171/9140/10133/285973/23001/64601/120892/79735/81671/8408/51100/57533/29982/284417	38
CC	GO:0001772	immunological synapse	21/3048	39/19559	3.70234e-08	1.30816e-06	1.06523e-06	27040/3958/3932/3002/923/975/8631/951/916/399/7535/56253/3383/3001/8417/940/5795/84868/11151/388325/84433	21
CC	GO:0031838	haptoglobin-hemoglobin complex	10/3048	11/19559	7.8797e-08	2.65761e-06	2.16409e-06	3039/3040/3043/3240/3049/3042/3048/3050/3047/3045	10
CC	GO:0070821	tertiary granule membrane	30/3048	73/19559	1.44277e-07	4.65451e-06	3.79016e-06	527/6556/84418/2358/8778/81619/57126/634/8972/2204/11314/53831/3687/101/6515/10288/1535/28956/199675/966/11322/2207/8773/338339/3684/1088/4973/3689/2548/100049587	30
CC	GO:0005770	late endosome	77/3048	278/19559	1.56443e-07	4.66164e-06	3.79597e-06	29082/968/11267/51622/55340/1201/221960/51009/9570/10948/27243/6556/9482/5595/80700/5289/8878/1512/51160/9528/220002/5605/79065/389541/9146/9516/9399/93343/84557/57535/65082/1318/57192/10542/100287171/23327/79720/8291/10312/967/83547/353376/10410/3482/7251/64601/84888/28956/27065/51652/120892/8938/55529/302/643834/5575/10490/5906/54432/8766/643847/4864/3784/1514/11342/5222/404636/8417/973/8530/25…	77
CC	GO:0030670	phagocytic vesicle membrane	31/3048	77/19559	1.57063e-07	4.66164e-06	3.79597e-06	339122/527/9114/3134/6556/5289/306/6810/1785/57192/533/567/155066/9554/55647/9140/3106/10312/6890/83547/535/1535/55529/3107/8773/7096/6891/3105/11031/11151/7097	31
CC	GO:0098802	plasma membrane signaling receptor complex	83/3048	307/19559	1.63941e-07	4.67864e-06	3.80981e-06	56616/8807/28639/54923/27429/634/55072/919/567/926/3693/3682/149111/3687/8809/958/7185/2064/28558/923/28638/1145/925/6386/28614/8631/916/64840/7535/28568/28569/28619/28620/28677/28606/28689/3594/7096/28691/28670/28673/28672/2550/28755/28671/28685/28526/917/28684/28680/28581/3679/28690/28664/28682/28666/28660/28674/3684/28662/28669/28616/28586/28617/973/28563/28576/28557/28589/28692/28653/28573/36…	83
CC	GO:0005833	hemoglobin complex	10/3048	12/19559	4.06078e-07	1.08939e-05	8.87086e-06	3039/3040/3043/3049/3042/3048/3050/3047/51327/3045	10
CC	GO:0101003	ficolin-1-rich granule membrane	26/3048	61/19559	4.11089e-07	1.08939e-05	8.87086e-06	527/6556/2357/2358/8778/5547/374403/8972/1604/2204/84658/11314/3958/10312/3687/535/101/6515/10288/1378/2207/338339/79930/3689/2548/100049587	26
CC	GO:0009897	external side of plasma membrane	102/3048	417/19559	1.3136e-06	3.361e-05	2.73686e-05	3577/3134/3579/28639/2213/1889/3537/2323/79908/643/762/10211/22914/9244/2214/7056/2352/8764/567/80741/3824/23308/3682/3554/933/939/9034/2217/958/1441/923/10666/1232/388077/28638/966/925/10859/2219/29126/916/4162/100133941/2207/8692/9619/100528032/931/3383/929/10663/2350/1901/3594/4481/356/9332/28526/917/343413/1236/115650/959/914/8482/3684/1508/8784/1438/4240/308/5133/973/940/8754/6403/921/3674/9…	102
CC	GO:0031902	late endosome membrane	44/3048	140/19559	1.96403e-06	4.8577e-05	3.95562e-05	29082/968/11267/55340/1201/9570/10948/27243/6556/9482/80700/51160/9528/220002/79065/389541/9146/9516/9399/93343/57535/65082/57192/10542/79720/967/83547/353376/10410/7251/64601/84888/28956/27065/51652/8938/55529/302/10490/54432/4864/11342/255231/3109	44
CC	GO:0005767	secondary lysosome	11/3048	16/19559	2.6316e-06	6.29885e-05	5.12916e-05	1201/2495/653361/5289/8878/2512/84557/101/120892/4688/4689	11
CC	GO:0043292	contractile fiber	64/3048	238/19559	4.94991e-06	0.000114776	9.34622e-05	3611/23345/64236/825/9659/9260/5687/6606/7168/8878/23224/6717/10273/226/114907/4635/22927/10398/801/2281/274/1465/10049/7136/6607/4607/1410/4636/87/3753/6546/1674/7111/8851/2274/9172/9759/7134/7139/7138/29780/7140/4633/27295/6840/59/4703/6513/9531/5058/58/4625/7125/29895/4604/6521/8557/4634/286/1471/4632/7169/7135/3315	64
CC	GO:0005775	vacuolar lumen	50/3048	173/19559	6.1335e-06	0.000137911	0.000112301	10437/23604/1667/8635/728358/4758/6448/2512/11240/383/9798/54472/3073/23593/10855/1668/2629/2588/27065/10577/1634/81567/2992/6386/302/1075/6609/671/25801/718/55313/410/93100/56729/356/29108/3614/1514/6383/23526/1508/5005/5641/3074/2548/4332/6948/7276/5645/1462	50
CC	GO:0031252	cell leading edge	100/3048	421/19559	6.51528e-06	0.000142186	0.000115782	3611/135/51763/374666/81565/4831/28988/9260/4739/79971/5590/322/126432/54828/7168/23224/9270/117177/6810/5662/10011/208/9051/57126/51330/10211/23710/1785/10092/6809/64787/5829/59338/4210/64411/7408/2017/660/23550/50855/26230/10458/8291/1072/89846/23380/22885/6993/23625/23136/51225/6453/26499/10347/87/54869/64419/72/6642/51466/323/6282/9026/302/1803/4641/5335/221472/51177/6277/8844/9750/54997/5141…	100
CC	GO:0035578	azurophil granule lumen	31/3048	91/19559	1.0233e-05	0.00021694	0.000176655	1667/8635/728358/2512/11240/383/9798/54472/23593/1668/2588/10577/81567/6386/302/1075/671/25801/718/55313/410/93100/56729/29108/3614/23526/5005/3074/4332/7276/5645	31
CC	GO:0030027	lamellipodium	55/3048	201/19559	1.2898e-05	0.000265842	0.000216475	3611/374666/4831/28988/4739/322/23224/9270/117177/6810/9051/57126/10211/1785/10092/6809/5829/4210/64411/7408/2017/26230/8291/1072/89846/23380/22885/6993/23625/51225/6453/26499/72/6642/51466/323/1803/5335/221472/54997/4638/1020/29780/121512/59/2934/1627/5058/58/3690/10677/11151/822/11275/2319	55
CC	GO:0030666	endocytic vesicle membrane	47/3048	164/19559	1.46505e-05	0.000293802	0.000239243	339122/527/9114/3134/6556/79971/7311/5289/306/6810/1785/7316/2210/57192/533/2209/567/155066/9554/55647/9140/22905/3106/10312/6890/83547/535/1535/160/8685/55529/1175/3107/8773/7096/6891/4481/3105/9332/11031/11151/928/7314/3117/7097/348/4035	47
CC	GO:0030017	sarcomere	56/3048	207/19559	1.55334e-05	0.00030331	0.000246986	3611/23345/64236/825/9260/5687/6606/7168/8878/23224/6717/10273/226/114907/4635/22927/10398/801/2281/274/1465/10049/7136/6607/4607/1410/87/3753/6546/1674/7111/2274/9172/9759/7134/7139/7138/29780/7140/4633/27295/4703/6513/9531/5058/58/4625/7125/6521/8557/4634/286/4632/7169/7135/3315	56
CC	GO:0001726	ruffle	50/3048	179/19559	1.71398e-05	0.000326095	0.00026554	51763/4831/28988/9260/126432/7168/9270/5662/208/51330/1785/64787/59338/4210/64411/2017/660/23550/50855/10458/1072/89846/10347/87/54869/64419/6282/9026/302/4641/5335/221472/51177/6277/8844/54997/5141/2268/526/121512/2934/23526/5058/64092/3690/5795/822/388325/11275/7099	50
CC	GO:0000421	autophagosome membrane	17/3048	38/19559	1.91433e-05	0.000355107	0.000289164	11337/55062/11345/10548/25851/51368/23710/84557/80183/643246/81631/285973/23001/81671/8408/51100/284417	17
CC	GO:0031091	platelet alpha granule	30/3048	91/19559	2.90515e-05	0.000525761	0.000428127	5004/1/7114/51368/51706/226/51571/2153/5265/340205/6622/259215/2157/1191/87/5196/10490/7422/5768/5005/6403/3674/2335/3690/7057/213/5473/7076/928/6678	30
CC	GO:0030016	myofibril	59/3048	227/19559	3.39755e-05	0.000600233	0.00048877	3611/23345/64236/825/9659/9260/5687/6606/7168/8878/23224/6717/10273/226/114907/4635/22927/10398/801/2281/274/1465/10049/7136/6607/4607/1410/87/3753/6546/1674/7111/2274/9172/9759/7134/7139/7138/29780/7140/4633/27295/6840/4703/6513/9531/5058/58/4625/7125/4604/6521/8557/4634/286/4632/7169/7135/3315	59
CC	GO:0005769	early endosome	88/3048	377/19559	4.51637e-05	0.000779336	0.000634613	29907/653440/1201/51009/27342/374666/9114/3134/55111/100137049/10612/28988/9482/5595/79971/80700/10938/10043/51160/5605/4311/208/9146/9516/10211/114804/23011/2210/65082/29886/2209/567/926/26088/100287171/142678/8877/8639/2047/8291/3106/115123/57732/90203/353376/79689/150684/933/3482/7251/64601/2064/10347/27065/8650/9595/6642/23355/3805/55361/29126/302/26056/221472/3107/4057/79890/2532/10490/5906/…	88
CC	GO:0098798	mitochondrial protein complex	66/3048	265/19559	5.10025e-05	0.000860087	0.000700369	100188893/126328/4704/64951/4701/440574/6391/51079/374291/116540/4714/593/4696/9692/4729/64963/64978/6150/122704/4580/10245/10476/115416/26589/130916/55139/518/4708/84545/4728/10573/1327/80273/51069/6687/64969/51023/4718/92609/128308/29093/1337/401505/539/6389/9551/219927/125988/581/400916/4707/4695/5164/10295/51650/6183/6182/64979/64968/516/514/521/51025/513/84419/1339	66
CC	GO:0061702	inflammasome complex	10/3048	17/19559	5.61278e-05	0.000925485	0.000753623	837/4671/79792/171389/838/834/22861/9447/29108/58484	10
CC	GO:0098562	cytoplasmic side of membrane	50/3048	188/19559	6.94892e-05	0.00112089	0.000912742	29082/56616/9885/6235/84299/27429/2793/5605/2774/9516/55072/79058/2790/23011/57655/2783/81502/9854/2778/640/6503/54331/118426/3932/9914/2534/7185/84888/2781/120892/5775/10681/9267/5127/3055/6277/7535/2268/10188/6234/5997/5728/2791/914/2539/26119/7053/6710/6521/286	50
CC	GO:0033177	proton-transporting two-sector ATPase complex, proton-transporting domain	12/3048	24/19559	8.6003e-05	0.00135775	0.00110561	527/9114/10476/518/533/155066/539/9551/10312/535/516/521	12
CC	GO:0019867	outer membrane	56/3048	220/19559	9.78302e-05	0.00151229	0.00123146	100188893/440574/23345/65018/2710/1375/65991/54470/4580/7311/23224/85450/55139/518/2180/1760/10058/55154/7316/572/383/637/5414/56947/5138/401505/23098/4056/8303/1528/125988/64757/23305/89941/581/5894/120892/2181/5521/598/51024/3429/56172/597/10018/26056/116151/4504/706/8408/51100/4128/5320/1717/2010/7314	56
CC	GO:0072562	blood microparticle	41/3048	148/19559	0.000114967	0.00174094	0.00141764	3039/3310/3040/3700/3043/5004/3240/1/3537/720/721/3303/54973/3048/3305/715/1191/3848/72/6386/3304/3311/718/713/6513/2934/308/5005/722/3674/58/2335/28919/213/714/6521/5644/3045/348/336/28452	41
CC	GO:0000407	phagophore assembly site	14/3048	32/19559	0.000139692	0.00207303	0.00168807	11152/8678/55062/60673/5289/26100/8878/79065/9140/285973/10533/81671/8408/23130	14
CC	GO:0031968	organelle outer membrane	55/3048	218/19559	0.000144257	0.00209879	0.00170905	100188893/440574/23345/65018/2710/1375/65991/54470/4580/7311/23224/85450/55139/518/2180/1760/10058/55154/7316/572/383/637/5414/56947/5138/401505/23098/4056/8303/1528/125988/64757/23305/89941/581/5894/120892/2181/5521/598/51024/3429/597/10018/26056/116151/4504/706/8408/51100/4128/5320/1717/2010/7314	55
CC	GO:0009898	cytoplasmic side of plasma membrane	44/3048	164/19559	0.000147992	0.00211173	0.00171958	29082/56616/9885/84299/27429/2793/5605/2774/9516/55072/79058/2790/23011/57655/2783/9854/2778/640/6503/54331/3932/9914/2534/7185/2781/5775/10681/9267/5127/3055/6277/7535/2268/10188/5997/5728/2791/914/2539/26119/7053/6710/6521/286	44
CC	GO:0005865	striated muscle thin filament	11/3048	22/19559	0.000170595	0.00236185	0.00192325	7168/7136/7111/7134/7139/7138/7140/58/7125/7169/7135	11
CC	GO:0044754	autolysosome	7/3048	10/19559	0.000171887	0.00236185	0.00192325	1201/2495/5289/8878/2512/84557/120892	7
CC	GO:0036379	myofilament	12/3048	26/19559	0.000226411	0.00305449	0.00248727	7168/7136/4607/7111/7134/7139/7138/7140/58/7125/7169/7135	12
CC	GO:0005741	mitochondrial outer membrane	49/3048	192/19559	0.000241183	0.00319567	0.00260223	100188893/440574/65018/2710/1375/65991/54470/4580/7311/55139/518/2180/1760/10058/55154/7316/572/383/637/5414/56947/5138/401505/23098/8303/1528/125988/64757/23305/89941/581/5894/120892/2181/5521/598/51024/3429/597/10018/26056/116151/4504/706/8408/51100/4128/5320/7314	49
CC	GO:0019898	extrinsic component of membrane	71/3048	306/19559	0.000281931	0.00367005	0.00298852	8897/9885/11152/8678/55062/5296/51004/653361/80700/64072/5289/26100/2793/5662/2774/146705/79058/2790/79934/2352/57655/94120/79133/2783/9810/2778/640/6503/23533/54331/23001/4118/2629/3932/23098/2534/152789/5329/9628/2781/683/8650/10681/4092/9267/5127/80149/2219/302/10018/3055/8651/22895/6277/7535/54843/2268/51025/10188/84958/8408/2791/23130/7053/4240/6768/9021/1154/29982/6281/247	71
CC	GO:0005771	multivesicular body	21/3048	62/19559	0.000288588	0.00369193	0.00300634	29082/55340/27243/1512/9146/23327/967/7251/27065/51652/120892/643834/5575/8766/643847/1514/5222/973/8530/6440/1471	21
CC	GO:0033116	endoplasmic reticulum-Golgi intermediate compartment membrane	24/3048	75/19559	0.000293677	0.00369336	0.0030075	65258/23423/1453/9570/147007/11018/79058/2153/5265/9554/1604/57222/90522/6890/149111/1294/2157/64689/7039/81671/966/51226/1075/6891	24
CC	GO:0071682	endocytic vesicle lumen	10/3048	20/19559	0.00033957	0.00419174	0.00341333	3039/3040/8993/3043/3240/10578/4057/6288/6678/348	10
CC	GO:0031093	platelet alpha granule lumen	22/3048	67/19559	0.000344604	0.00419174	0.00341333	5004/1/7114/51368/226/51571/2153/5265/2157/1191/87/5196/10490/7422/5768/5005/2335/7057/213/5473/7076/6678	22
CC	GO:0005925	focal adhesion	91/3048	415/19559	0.000352717	0.00422123	0.00343734	3611/84964/527/5094/9260/5595/4739/11078/6235/23224/2580/5605/4311/23092/55679/10211/83478/79038/1785/10092/23011/5829/2783/6645/3303/7408/567/7089/2017/6503/1465/3693/1072/6203/1264/3482/2314/5329/1535/87/8650/975/51466/8573/966/10867/6386/726/6168/1803/3055/4162/3304/4082/8773/64098/81873/7145/7052/22800/10095/2274/3383/9448/6209/29780/1265/6840/6141/6223/6169/2934/682/308/10174/8754/5058/977/3…	91
CC	GO:0062023	collagen-containing extracellular matrix	93/3048	427/19559	0.000388914	0.00458054	0.00372994	4318/3700/5004/1667/728358/1/5118/311/80781/1512/30008/8728/7045/283/439921/5265/285613/307/7123/5359/3958/6590/7869/1294/1191/6280/3848/8510/5654/1634/5199/2161/4256/1299/4016/8573/4485/7148/5196/2219/5046/302/1075/6277/1476/8404/6423/1308/7078/7052/1292/4317/3383/6279/3914/713/8425/1514/6383/8482/1508/3965/4240/308/5005/712/6275/977/8292/2335/43/9518/4054/4684/7057/714/7076/1298/6281/5644/1471/…	93
CC	GO:0031901	early endosome membrane	42/3048	161/19559	0.000395266	0.00458262	0.00373163	653440/1201/27342/374666/3134/100137049/79971/80700/10938/9146/9516/23011/2210/29886/2209/567/926/26088/100287171/8877/2047/3106/115123/57732/90203/353376/79689/7251/10347/27065/6642/3805/55361/29126/26056/221472/3107/10490/3105/11031/10457/8417	42
CC	GO:0030055	cell-substrate junction	92/3048	423/19559	0.000437461	0.00499378	0.00406644	3611/84964/527/5094/9260/5595/4739/11078/6235/23224/2580/5605/4311/23092/55679/10211/83478/79038/1785/10092/23011/5829/2783/6645/3303/7408/567/7089/2017/6503/1465/3693/1072/6203/1264/3482/2314/5329/1535/87/8650/975/51466/8573/966/10867/6386/726/6168/1803/3055/4162/3304/4082/1308/8773/64098/81873/7145/7052/22800/10095/2274/3383/9448/6209/29780/1265/6840/6141/6223/6169/2934/682/308/10174/8754/5058/…	92
CC	GO:0031300	intrinsic component of organelle membrane	87/3048	398/19559	0.000521109	0.00585853	0.0047706	440574/1201/51009/3300/65018/221496/3134/65991/84649/81552/83460/10237/51234/205251/55831/10245/28972/84255/79971/1889/9159/2131/81926/26580/100131801/90196/9445/284361/1760/10058/637/57655/9409/81502/51016/6804/57134/567/6687/5026/56947/23770/5864/10998/94097/8834/129293/3106/57222/90522/6890/8677/11079/6252/57414/125988/6253/84888/5986/89941/80024/5025/291/400916/51024/9524/2081/161247/8460/310…	87
CC	GO:0016469	proton-transporting two-sector ATPase complex	18/3048	52/19559	0.000569829	0.00631065	0.00513876	527/9114/147007/10476/51382/518/533/155066/539/9551/10312/529/535/516/514/521/513/526	18
CC	GO:0031301	integral component of organelle membrane	81/3048	367/19559	0.000587127	0.00640659	0.00521689	440574/1201/51009/65018/221496/3134/65991/84649/81552/83460/10237/51234/205251/55831/10245/28972/84255/79971/9159/2131/26580/100131801/90196/9445/284361/1760/10058/637/9409/81502/51016/6804/57134/567/6687/5026/56947/23770/10998/94097/8834/129293/3106/57222/90522/6890/8677/11079/6252/57414/125988/6253/84888/5986/89941/80024/5025/291/400916/51024/9524/2081/161247/8460/3107/64840/91252/54344/5498/48…	81
CC	GO:0005793	endoplasmic reticulum-Golgi intermediate compartment	35/3048	130/19559	0.000624441	0.00671501	0.00546803	126003/65258/23423/1453/9570/147007/51112/4043/11018/762/79058/2153/5265/9798/9554/1604/57222/90522/6890/353376/149111/11079/1294/2157/64689/7039/29097/81671/966/51226/1075/6891/2335/290/871	35
CC	GO:0055037	recycling endosome	47/3048	190/19559	0.000672214	0.00712547	0.00580227	653440/53916/11267/84440/1201/27342/374666/3134/55111/9482/9744/117584/10938/81926/79065/55630/1318/89848/567/100287171/10133/3106/150684/933/64601/6453/27065/79735/8938/29126/26056/3107/4057/83590/9619/2532/10490/79772/8766/3105/8408/26119/2852/10397/8417/255231/57533	47
CC	GO:0005743	mitochondrial inner membrane	102/3048	489/19559	0.00101963	0.0106559	0.00867707	57048/126328/4704/64951/4701/440574/6391/51079/374291/83985/116540/65018/4714/4696/26164/4729/51004/64963/100137049/64978/6150/122704/116228/205251/147015/10245/10476/55969/84334/26589/6901/84129/51312/401612/100131801/518/4708/54998/84545/283130/4728/10573/58472/11194/51537/79934/1327/79133/80273/51069/6687/64969/51023/9489/4718/92609/56848/128308/29093/5138/1337/51629/539/94097/6389/8834/9551/3…	102
CC	GO:0000313	organellar ribosome	25/3048	87/19559	0.00131719	0.0133884	0.0109022	64951/4701/116540/26164/64963/64978/6150/122704/115416/26589/130916/84545/10573/51069/64969/51023/128308/29093/219927/92170/51650/6183/6182/64979/64968	25
CC	GO:0005761	mitochondrial ribosome	25/3048	87/19559	0.00131719	0.0133884	0.0109022	64951/4701/116540/26164/64963/64978/6150/122704/115416/26589/130916/84545/10573/51069/64969/51023/128308/29093/219927/92170/51650/6183/6182/64979/64968	25
CC	GO:1905368	peptidase complex	26/3048	92/19559	0.00139217	0.0139593	0.011367	5715/5700/5719/3300/9789/5683/5687/5698/9352/28972/130617/27429/5699/6687/90701/55578/5710/9491/112869/9861/23478/56943/90637/5721/10474/3315	26
CC	GO:0044391	ribosomal subunit	45/3048	187/19559	0.0015766	0.0154334	0.0125674	3039/64951/116540/3040/64963/64978/6150/122704/115416/26589/7311/130916/6235/84545/10573/51069/64969/51023/6158/128308/29093/6203/219927/6157/6137/6142/6168/51650/6183/6182/64979/64968/9045/6139/6134/6234/6209/6141/6223/6169/9636/6167/6173/6171/6210	45
CC	GO:0098857	membrane microdomain	72/3048	330/19559	0.00158078	0.0154334	0.0125674	1201/27040/8837/5595/5590/5566/4311/8717/57126/389541/10211/9399/10542/29098/1613/1604/5359/2047/10855/4118/8291/3932/2534/3162/962/8772/28956/10666/120892/84830/925/3753/6386/55361/8631/302/1803/4641/3055/100133941/7535/8692/931/3383/929/4864/1901/7096/356/5348/3937/3784/7133/914/3778/6513/3684/682/83483/973/930/55600/1241/4973/6281/3689/150372/84433/2319/7097/871/9289	72
CC	GO:0005811	lipid droplet	26/3048	93/19559	0.00165075	0.0159072	0.0129533	9885/497661/84649/440503/10938/51099/26580/5908/79888/729359/9144/2181/10970/302/8605/89872/285848/50486/80270/1066/23130/9249/2167/123/168537/29923	26
CC	GO:0033179	proton-transporting V-type ATPase, V0 domain	6/3048	10/19559	0.00169467	0.0161211	0.0131274	527/9114/533/155066/10312/535	6
CC	GO:0098800	inner mitochondrial membrane protein complex	35/3048	138/19559	0.00194834	0.0182996	0.0149014	126328/4704/4701/440574/6391/51079/374291/4714/4696/4729/10245/10476/518/4708/4728/1327/80273/6687/4718/92609/1337/539/6389/9551/125988/400916/4707/4695/516/514/521/51025/513/84419/1339	35
CC	GO:0008180	COP9 signalosome	13/3048	36/19559	0.00209588	0.0194393	0.0158294	3310/27040/150678/10211/10409/3303/3305/10987/2873/5335/3304/7111/3311	13
CC	GO:0031092	platelet alpha granule membrane	8/3048	17/19559	0.00222623	0.0203934	0.0166063	51706/6622/259215/6403/3674/3690/928/6678	8
CC	GO:0045121	membrane raft	71/3048	329/19559	0.00227843	0.020617	0.0167884	1201/27040/8837/5595/5590/5566/4311/8717/57126/389541/10211/9399/10542/29098/1613/1604/5359/2047/10855/4118/3932/2534/3162/962/8772/28956/10666/120892/84830/925/3753/6386/55361/8631/302/1803/4641/3055/100133941/7535/8692/931/3383/929/4864/1901/7096/356/5348/3937/3784/7133/914/3778/6513/3684/682/83483/973/930/55600/1241/4973/6281/3689/150372/84433/2319/7097/871/9289	71
CC	GO:0035577	azurophil granule membrane	18/3048	58/19559	0.00236934	0.0211813	0.0172479	968/25798/527/2357/5547/10043/9218/5908/79888/4718/967/10970/8876/1088/4680/150372/2548/719	18
CC	GO:0032153	cell division site	21/3048	72/19559	0.00253479	0.0223906	0.0182327	84440/84942/11258/10296/5662/9051/23011/389/5414/1731/5413/3384/54820/79187/200942/10801/113026/8766/4638/79768/6840	21
CC	GO:0031227	intrinsic component of endoplasmic reticulum membrane	40/3048	166/19559	0.0027017	0.0235842	0.0192046	1201/51009/3300/3134/84649/83460/10237/51234/55831/28972/84255/2131/26580/284361/57655/81502/51016/567/23770/10998/3106/57222/6890/6252/57414/6253/84888/9524/2081/161247/3107/64840/54344/6891/219855/8818/3105/10170/1717/3117	40
CC	GO:0030176	integral component of endoplasmic reticulum membrane	38/3048	158/19559	0.00351356	0.0303147	0.0246852	1201/51009/3134/84649/83460/10237/51234/55831/28972/84255/2131/26580/284361/81502/51016/567/23770/10998/3106/57222/6890/6252/57414/6253/84888/9524/2081/161247/3107/64840/54344/6891/219855/8818/3105/10170/1717/3117	38
CC	GO:0030018	Z disc	32/3048	128/19559	0.00376215	0.0320864	0.026128	64236/825/9260/6606/23224/6717/10273/114907/10398/2281/274/1465/10049/6607/1410/87/3753/6546/1674/2274/9759/29780/27295/4703/6513/9531/5058/4625/6521/8557/286/3315	32
CC	GO:0043209	myelin sheath	15/3048	47/19559	0.00394628	0.0332743	0.0270953	22933/4155/5590/6810/4359/2664/2064/6715/302/57471/231/5728/2934/10100/2752	15
CC	GO:0030135	coated vesicle	64/3048	298/19559	0.0040703	0.0339344	0.0276328	8907/23423/29924/9570/55062/3134/28988/147007/1889/11018/146705/1785/2153/2210/5265/65082/2209/567/9554/5864/22905/55707/3106/57222/90522/353376/149111/10016/1294/29988/3482/1212/2157/64601/160/7039/8650/29097/966/9026/51226/4643/1175/1075/83988/3107/10490/10188/8906/6720/3105/917/79958/8120/26119/6440/4900/3575/915/928/6272/3117/348/4035	64
CC	GO:0098589	membrane region	72/3048	343/19559	0.00439917	0.0362687	0.0295336	1201/27040/8837/5595/5590/5566/4311/8717/57126/389541/10211/9399/10542/29098/1613/1604/5359/2047/10855/4118/8291/3932/2534/3162/962/8772/28956/10666/120892/84830/925/3753/6386/55361/8631/302/1803/4641/3055/100133941/7535/8692/931/3383/929/4864/1901/7096/356/5348/3937/3784/7133/914/3778/6513/3684/682/83483/973/930/55600/1241/4973/6281/3689/150372/84433/2319/7097/871/9289	72
CC	GO:0055038	recycling endosome membrane	23/3048	85/19559	0.00464041	0.0378372	0.0308108	653440/84440/374666/3134/9744/117584/10938/81926/55630/567/100287171/10133/3106/27065/8938/29126/26056/3107/10490/8766/3105/10397/255231	23
CC	GO:0031674	I band	34/3048	140/19559	0.0047205	0.0380719	0.0310019	64236/825/9260/6606/23224/6717/10273/226/114907/10398/2281/274/1465/10049/6607/1410/87/3753/6546/1674/2274/9759/29780/27295/4703/6513/9531/5058/4625/6521/8557/4634/286/3315	34
CC	GO:0030134	COPII-coated ER to Golgi transport vesicle	25/3048	95/19559	0.00483111	0.038545	0.0313872	23423/9570/3134/11018/2153/5265/567/9554/3106/57222/90522/353376/149111/10016/1294/2157/7039/29097/966/1075/3107/10490/6720/3105/3117	25
CC	GO:0031904	endosome lumen	12/3048	35/19559	0.00501318	0.0395721	0.0322236	4043/1512/567/967/643834/643847/1514/5222/1508/5551/5641/6440	12
CC	GO:0098858	actin-based cell projection	49/3048	220/19559	0.00536453	0.0418998	0.034119	83874/374666/10809/6286/64072/322/23224/634/374403/64787/389/90410/7408/84173/8639/26230/2047/10458/3384/529/4354/4648/4542/160/9732/120892/200958/72/4643/4641/6533/9750/125336/8692/57471/526/231/1020/84958/83715/51181/5816/121512/2258/59/58/3690/10123/388325	49
CC	GO:0030662	coated vesicle membrane	42/3048	183/19559	0.00548932	0.0421686	0.0343379	8907/23423/29924/9570/3134/28988/147007/146705/2210/2209/567/9554/5864/22905/55707/3106/149111/10016/29988/3482/1212/160/7039/966/9026/51226/1175/83988/3107/10490/8906/6720/3105/917/8120/26119/4900/3575/915/928/3117/348	42
CC	GO:0015934	large ribosomal subunit	29/3048	116/19559	0.00561873	0.0421686	0.0343379	116540/64978/6150/122704/115416/26589/7311/130916/84545/10573/51069/6158/128308/29093/219927/6157/6137/6142/6168/6182/64979/9045/6139/6134/6141/6169/6167/6173/6171	29
CC	GO:0000276	mitochondrial proton-transporting ATP synthase complex, coupling factor F(o)	6/3048	12/19559	0.00562627	0.0421686	0.0343379	10476/518/539/9551/516/521	6
CC	GO:0044327	dendritic spine head	6/3048	12/19559	0.00562627	0.0421686	0.0343379	4600/1785/23380/4599/2852/4900	6
CC	GO:0032154	cleavage furrow	16/3048	54/19559	0.00666217	0.0494333	0.0402535	84440/84942/11258/5662/9051/23011/389/3384/54820/79187/200942/113026/8766/4638/79768/6840	16
MF	GO:0030246	carbohydrate binding	79/2955	267/18352	1.99936e-08	1.55235e-05	1.35769e-05	112398/408050/283820/79676/432/8778/1117/79660/226/22914/26253/51267/5213/27036/4247/2584/8972/721/112399/59271/80216/1116/7123/654346/3824/55057/3958/433/26232/933/29988/3482/1203/971/6515/3848/3101/29094/10423/5066/2219/89790/348174/64581/497190/3821/27180/100528032/338339/50856/79623/8693/130589/5351/284194/2539/682/3965/51348/2591/6403/5836/4123/55600/3820/5509/5967/2203/4973/10462/2548/10004…	79
MF	GO:0043177	organic acid binding	69/2955	224/18352	2.69271e-08	1.55235e-05	1.35769e-05	112398/3039/10588/79676/80765/3040/2644/4831/3043/652968/8778/6256/3049/6573/6809/3042/2352/27036/3399/7130/5914/112399/3155/145864/241/23569/113235/3048/933/2946/3482/5091/6280/5467/1382/6342/5066/2219/89790/8309/212/8692/27180/1645/2350/83667/51/6279/5351/165140/7421/573971/23564/3050/10894/2167/5730/6403/5836/3047/5468/213/1646/2752/341/100049587/2168/3045/1462	69
MF	GO:0042287	MHC protein binding	22/2955	42/18352	6.24255e-08	2.39922e-05	2.09837e-05	22914/51571/926/3824/6890/29990/29992/10288/975/925/10859/64581/100528032/6891/3809/3812/343413/28664/28682/28589/28653/3902	22
MF	GO:0140375	immune receptor activity	46/2955	135/18352	2.19973e-07	6.34073e-05	5.54565e-05	3577/3579/8807/27202/2213/2357/2358/1512/643/22914/7850/3566/9244/2210/2859/728/3554/8809/9034/1441/10288/1378/1232/50615/3805/10859/3460/3811/2207/1240/100528032/10663/3594/3112/2057/1236/3587/1438/51348/3560/3575/3556/9173/1230/3117/719	46
MF	GO:0019865	immunoglobulin binding	15/2955	24/18352	3.73067e-07	8.06308e-05	7.05202e-05	2215/2213/2212/2214/2210/2209/2204/3958/11027/933/2217/2207/9103/931/2208	15
MF	GO:0005344	oxygen carrier activity	11/2955	14/18352	4.19588e-07	8.06308e-05	7.05202e-05	3039/3040/3043/3049/3042/3048/26034/4151/3050/3047/3045	11
MF	GO:0031720	haptoglobin binding	9/2955	10/18352	6.16055e-07	0.000101473	8.8749e-05	3039/3040/3043/3049/3042/3048/3050/3047/3045	9
MF	GO:0016209	antioxidant activity	32/2955	86/18352	1.71716e-06	0.000247486	0.000216453	3039/6648/3040/6415/3043/140809/4259/3240/10587/3049/3042/2954/2878/241/3048/84817/4056/2946/6280/26034/125336/51714/83667/4504/9973/3050/3047/213/7001/2168/3045/348	32
MF	GO:0033293	monocarboxylic acid binding	28/2955	72/18352	2.74519e-06	0.000302056	0.00026418	80765/4831/6256/6809/3399/5914/241/2946/3482/5091/6280/5467/1382/6342/8309/1645/51/6279/165140/7421/2167/5730/5836/5468/213/1646/341/2168	28
MF	GO:0019864	IgG binding	9/2955	11/18352	2.89935e-06	0.000302056	0.00026418	2215/2213/2212/2214/2210/2209/2217/2207/9103	9
MF	GO:0003779	actin binding	107/2955	437/18352	3.22933e-06	0.000302056	0.00026418	79585/653440/23345/64236/374666/10296/28988/9260/10093/11078/7114/7168/23224/9051/226/634/2039/10092/6876/51734/23406/64787/283/4635/9645/4210/6645/7408/100287171/4046/2017/142678/10755/26260/274/7136/6622/1072/170954/1264/9696/4607/4648/22885/23136/64601/2314/752/4542/87/54869/120892/3059/51466/9026/4643/4641/83988/134549/7111/8851/4082/2633/64098/81873/7145/122622/10095/9172/4638/57471/7134/641…	107
MF	GO:0003953	NAD+ nucleosidase activity	11/2955	16/18352	3.66763e-06	0.000302056	0.00026418	8807/23098/3554/8809/683/7096/81793/3556/9173/7097/7099	11
MF	GO:0050135	NAD(P)+ nucleosidase activity	11/2955	16/18352	3.66763e-06	0.000302056	0.00026418	8807/23098/3554/8809/683/7096/81793/3556/9173/7097/7099	11
MF	GO:0061809	NAD+ nucleotidase, cyclic ADP-ribose generating	11/2955	16/18352	3.66763e-06	0.000302056	0.00026418	8807/23098/3554/8809/683/7096/81793/3556/9173/7097/7099	11
MF	GO:0031406	carboxylic acid binding	60/2955	212/18352	4.74106e-06	0.000364429	0.000318732	112398/10588/79676/80765/2644/4831/652968/8778/6256/6573/6809/2352/27036/3399/7130/5914/112399/3155/145864/241/23569/113235/933/2946/3482/5091/6280/5467/1382/6342/5066/2219/89790/8309/212/8692/27180/1645/2350/83667/51/6279/5351/165140/7421/573971/23564/10894/2167/5730/6403/5836/5468/213/1646/2752/341/100049587/2168/1462	60
MF	GO:0005504	fatty acid binding	18/2955	39/18352	1.01572e-05	0.000731954	0.000640172	4831/6809/3399/241/2946/6280/5467/6342/8309/51/6279/165140/2167/5730/5468/213/341/2168	18
MF	GO:0016504	peptidase activator activity	18/2955	40/18352	1.56966e-05	0.0010646	0.000931107	65018/8837/5118/1512/572/400410/4118/64115/1075/26577/834/6423/22861/29108/91662/5721/58484/2335	18
MF	GO:0008307	structural constituent of muscle	18/2955	43/18352	5.17516e-05	0.00331498	0.0028993	825/7168/10398/4637/1465/4607/4636/9172/444/4633/27295/4703/29895/4604/8557/4634/4632/7169	18
MF	GO:0060589	nucleoside-triphosphatase regulator activity	84/2955	348/18352	6.06746e-05	0.00368199	0.00322029	2874/83874/3300/10156/60682/51256/2968/23568/9744/11033/8498/126432/64333/100271927/9270/23092/10900/83478/23329/573/10144/119016/414059/5998/6904/374403/9605/26037/201163/55843/116988/64411/80273/729540/201176/116985/2664/5864/10049/57568/26230/10435/63940/4607/8787/23380/10636/9628/9732/9610/3993/120892/79735/23216/10681/9138/2873/55738/3267/729857/399/9938/79890/10188/83667/84220/8131/400966/5…	84
MF	GO:0038187	pattern recognition receptor activity	12/2955	23/18352	6.97992e-05	0.00402393	0.00351935	8993/26253/54106/8685/2219/64581/929/64127/23643/51311/7097/7099	12
MF	GO:0030695	GTPase regulator activity	75/2955	307/18352	9.7532e-05	0.00535497	0.00468349	2874/83874/10156/60682/51256/23568/9744/11033/8498/126432/64333/100271927/9270/23092/10900/83478/23329/10144/119016/414059/5998/6904/374403/9605/26037/201163/55843/116988/64411/729540/201176/116985/2664/57568/26230/10435/63940/8787/23380/10636/9628/9732/9610/3993/120892/79735/23216/10681/9138/2873/55738/3267/729857/399/9938/79890/10188/83667/84220/8131/400966/56882/29/5997/23365/11138/23526/9826/…	75
MF	GO:0005543	phospholipid binding	103/2955	454/18352	0.000134457	0.00704679	0.00616317	29907/9885/11152/65258/10156/29924/55062/100137049/653361/27243/26207/2869/11033/311/64342/25851/26100/64333/306/26580/100271927/5333/5662/4311/1606/654816/23092/27111/57649/572/5338/84557/80183/94120/59338/79792/29886/9854/55968/64411/654817/64853/116985/307/23550/11314/274/22905/23001/81846/8291/6622/57732/90203/79856/150684/57699/79156/2314/26499/51652/6642/55876/5130/8938/9026/6386/4643/302/2…	103
MF	GO:0036041	long-chain fatty acid binding	9/2955	15/18352	0.000141872	0.00711209	0.00622028	6809/241/6280/5467/6342/6279/165140/2167/5468	9
MF	GO:0016651	oxidoreductase activity, acting on NAD(P)H	33/2955	109/18352	0.000155303	0.00746099	0.00652543	4704/4701/51079/374291/4714/4696/5447/4729/653361/10587/4835/51706/654816/10901/4708/4728/9645/654817/4718/84817/1535/2766/4707/51700/4695/4688/51167/1645/51714/51181/64780/4689/1646	33
MF	GO:0019825	oxygen binding	15/2955	36/18352	0.000230203	0.010617	0.00928566	112398/3039/3040/3043/3049/3042/3048/875/4151/3050/3047/213/1545/1588/3045	15
MF	GO:0051015	actin filament binding	53/2955	206/18352	0.000254649	0.0112927	0.00987667	79585/23345/28988/10093/11078/7168/23224/9051/2039/10092/6876/23406/4635/2017/274/1072/4648/22885/64601/2314/752/4542/87/3059/9026/4643/4641/134549/7111/8851/4082/81873/122622/10095/9172/57471/7134/201191/83715/10634/10804/6840/4703/2934/1627/64780/6710/4625/7125/10677/11151/822/7169	53
MF	GO:0016684	oxidoreductase activity, acting on peroxide as acceptor	20/2955	56/18352	0.000278149	0.0114701	0.0100318	3039/3040/3043/4259/3049/3042/2954/2878/241/3048/84817/4056/2946/26034/125336/83667/3050/3047/7001/3045	20
MF	GO:0004601	peroxidase activity	19/2955	52/18352	0.000279835	0.0114701	0.0100318	3039/3040/3043/4259/3049/3042/2954/2878/241/3048/84817/4056/2946/26034/125336/3050/3047/7001/3045	19
MF	GO:0001540	amyloid-beta binding	25/2955	77/18352	0.000288493	0.0114701	0.0100318	9546/2213/2358/322/4043/9445/321/10307/26232/1191/1410/10288/323/8685/4481/3684/26119/712/43/3689/1471/7097/348/4035/7099	25
MF	GO:0002020	protease binding	38/2955	137/18352	0.000380397	0.0146199	0.0127867	374291/51009/65018/4155/8837/117584/6717/57126/10211/3934/7316/5265/8738/114769/8996/274/3554/57414/8772/51652/3640/302/1803/1476/8851/7078/4282/29108/5728/58484/940/2335/3690/7076/1471/6402/2319/4035	38
MF	GO:0044389	ubiquitin-like protein ligase binding	74/2955	316/18352	0.00042562	0.0150433	0.013157	8517/11337/3310/4087/4738/527/8678/65018/5094/5002/11345/9482/117584/11078/7320/322/7311/5566/8878/409/10273/9146/9470/23710/55072/573/7316/84557/637/8764/5829/643246/81631/81502/3303/54472/118424/9810/100287171/51035/55611/4287/25793/3305/25820/1051/1191/958/7251/7185/4157/875/4092/5798/1840/3304/4055/3311/155061/83666/10188/8452/28951/7133/6923/391257/2272/9636/1152/7321/8345/149628/5899/7314	74
MF	GO:0016799	hydrolase activity, hydrolyzing N-glycosyl compounds	14/2955	34/18352	0.0004289	0.0150433	0.013157	8807/23583/4968/79661/23098/3554/8809/683/7096/81793/3556/9173/7097/7099	14
MF	GO:0017016	Ras GTPase binding	93/2955	415/18352	0.000430555	0.0150433	0.013157	84440/83874/27342/8859/9467/23214/51256/26030/23370/79711/26297/11078/10938/8498/9649/117177/253980/23329/51571/80851/414059/374403/79961/64787/94120/647135/90410/29098/1613/729540/2664/56848/22898/10133/50855/26230/57139/83593/81846/10435/83547/89846/23380/92558/221002/752/10602/83892/4296/9732/54869/9610/3993/120892/79735/23216/26999/9138/4688/302/4641/26056/221472/22895/729857/399/5866/79890/5…	93
MF	GO:0050786	RAGE receptor binding	7/2955	11/18352	0.000503394	0.017071	0.0149304	6286/2357/6284/6280/6283/6279/6275	7
MF	GO:0031267	small GTPase binding	95/2955	428/18352	0.000528109	0.0173974	0.0152159	84440/83874/27342/8859/9467/23214/51256/26030/23370/79711/26297/11078/10938/8498/9649/117177/253980/23329/51571/80851/414059/374403/79961/64787/94120/647135/90410/29098/1613/729540/26088/2664/56848/22898/10133/50855/26230/57139/83593/81846/10435/83547/89846/23380/92558/221002/752/10602/83892/4296/9732/54869/9610/3993/120892/79735/23216/26999/9138/4688/302/4641/26056/221472/22895/729857/399/5866/7…	95
MF	GO:0005164	tumor necrosis factor receptor binding	13/2955	31/18352	0.000554973	0.0177746	0.0155457	8717/4050/8742/4049/8740/8741/8772/7185/10572/356/959/944/8743	13
MF	GO:0016627	oxidoreductase activity, acting on the CH-CH group of donors	20/2955	59/18352	0.00060836	0.0189578	0.0165806	30/6391/84129/55825/27034/54920/6389/64118/1666/6715/9524/6916/8309/645/1645/5498/51/644/1717/1646	20
MF	GO:0043028	cysteine-type endopeptidase regulator activity involved in apoptotic process	16/2955	43/18352	0.000659656	0.0200154	0.0175056	1512/4671/572/8740/400410/8996/6622/939/51176/834/6195/22861/4504/29108/25816/91662	16
MF	GO:0005096	GTPase activator activity	65/2955	275/18352	0.000710255	0.020998	0.018365	83874/10156/60682/51256/9744/11033/8498/126432/64333/100271927/23092/83478/23329/10144/119016/414059/5998/6904/374403/9605/26037/201163/55843/116988/64411/729540/201176/116985/2664/57568/26230/10435/8787/23380/10636/9628/9732/9610/3993/120892/79735/23216/10681/9138/55738/3267/729857/9938/79890/84220/8131/400966/29/5997/23365/11138/23526/9826/55357/5909/57533/64744/55803/6001/216	65
MF	GO:0005085	guanyl-nucleotide exchange factor activity	53/2955	215/18352	0.000765025	0.0218272	0.0190902	1936/51622/83874/27342/9467/26030/23370/266747/8892/26297/126432/9649/117177/5662/389541/80851/9266/10045/23348/79961/64787/201163/10542/29098/22898/51195/23550/26230/57139/81846/89846/221002/6453/28956/9732/54869/9267/9138/27128/221472/5866/79890/23258/5906/9922/29/23365/121512/79958/404636/9826/115727/55701	53
MF	GO:0005507	copper ion binding	20/2955	60/18352	0.000776163	0.0218272	0.0190902	475/10063/2153/283/8639/6284/314/6622/150684/2157/6283/5025/9616/4016/5066/333929/4504/285362/9973/213	20
MF	GO:0048029	monosaccharide binding	22/2955	69/18352	0.000858996	0.0235815	0.0206245	112398/79676/226/5213/2584/112399/80216/29988/3482/1203/6515/3101/5066/50856/5351/2539/682/3965/6403/5836/2203/229	22
MF	GO:0004407	histone deacetylase activity	11/2955	25/18352	0.000909649	0.0238369	0.0208479	51547/22933/25855/83933/23410/79885/51548/8841/4287/10014/9759	11
MF	GO:0023023	MHC protein complex binding	11/2955	25/18352	0.000909649	0.0238369	0.0208479	311/51571/3824/10288/975/925/10859/3821/931/3112/3109	11
MF	GO:0017136	NAD-dependent histone deacetylase activity	8/2955	15/18352	0.000988289	0.0253222	0.0221469	51547/22933/23410/79885/51548/8841/10014/9759	8
MF	GO:0004875	complement receptor activity	7/2955	12/18352	0.00104007	0.0260697	0.0228007	27202/2357/2358/728/1378/1240/719	7
MF	GO:0060090	molecular adaptor activity	72/2955	316/18352	0.00112949	0.0275083	0.0240589	6500/27040/8907/103091866/9570/825/9659/55909/64768/162989/9482/10093/8775/23479/409/10273/6810/5605/116841/8717/389541/10603/6809/53407/602/10542/5414/6804/8738/55691/22839/9554/1731/5413/10133/10458/284029/23098/8677/10016/25793/10636/23136/79368/6453/28956/160/387755/120892/9026/6386/55841/1175/916/8844/117157/10801/8773/10490/9046/8906/9709/10634/917/26119/286257/8417/6521/8557/55803/286/3883…	72
MF	GO:0042288	MHC class I protein binding	10/2955	22/18352	0.00114518	0.0275083	0.0240589	22914/926/6890/29990/29992/10288/925/10859/100528032/6891	10
MF	GO:1901981	phosphatidylinositol phosphate binding	45/2955	179/18352	0.00119731	0.0281734	0.0246406	9885/11152/55062/653361/11033/25851/26100/64333/5333/654816/27111/80183/59338/79792/64411/654817/116985/57732/90203/150684/79156/2314/26499/55876/9026/6386/302/207/79685/221472/22895/54843/3759/3784/29916/6840/79958/2934/23130/26119/4900/4689/10677/822/55803	45
MF	GO:0031625	ubiquitin protein ligase binding	68/2955	297/18352	0.00133461	0.0305006	0.026676	8517/11337/3310/4087/4738/527/8678/65018/5094/5002/11345/9482/117584/11078/7320/322/7311/5566/8878/409/10273/9470/23710/55072/573/7316/84557/637/8764/5829/643246/81631/81502/3303/54472/118424/9810/100287171/51035/55611/4287/25793/3305/25820/1191/958/7251/7185/4157/875/4092/1840/3304/4055/3311/155061/10188/8452/28951/7133/6923/2272/9636/1152/7321/149628/5899/7314	68
MF	GO:0033558	protein deacetylase activity	11/2955	26/18352	0.00134912	0.0305006	0.026676	51547/22933/25855/83933/23410/79885/51548/8841/4287/10014/9759	11
MF	GO:0046933	proton-transporting ATP synthase activity, rotational mechanism	9/2955	19/18352	0.00141521	0.0307874	0.0269269	527/10476/518/539/9551/516/514/521/513	9
MF	GO:0050664	oxidoreductase activity, acting on NAD(P)H, oxygen as acceptor	9/2955	19/18352	0.00141521	0.0307874	0.0269269	653361/654816/9645/654817/1535/4688/51167/64780/4689	9
MF	GO:0034979	NAD-dependent protein deacetylase activity	8/2955	16/18352	0.00169868	0.0362699	0.0317219	51547/22933/23410/79885/51548/8841/10014/9759	8
MF	GO:1902936	phosphatidylinositol bisphosphate binding	32/2955	119/18352	0.00184138	0.0385838	0.0337456	9885/11152/55062/653361/11033/26100/5333/654816/27111/59338/79792/64411/654817/90203/150684/2314/26499/55876/9026/6386/302/207/22895/54843/3759/3784/6840/2934/26119/10677/822/55803	32
MF	GO:0030145	manganese ion binding	20/2955	64/18352	0.00190378	0.0385838	0.0337456	79716/65258/6648/5566/383/4247/5494/3155/132160/4245/51567/10423/2992/147699/120071/5184/8693/2591/2752/131870	20
MF	GO:0031386	protein tag	7/2955	13/18352	0.0019409	0.0385838	0.0337456	4738/7311/7316/59286/391257/9636/7314	7
MF	GO:0032036	myosin heavy chain binding	7/2955	13/18352	0.0019409	0.0385838	0.0337456	4635/6804/10398/4607/4633/11151/4634	7
MF	GO:0016868	intramolecular transferase activity, phosphotransferases	6/2955	10/18352	0.00202059	0.038829	0.0339601	5372/5223/5373/669/5236/5224	6
MF	GO:0032052	bile acid binding	6/2955	10/18352	0.00202059	0.038829	0.0339601	80765/1645/7421/5836/1646/2168	6
MF	GO:0016811	hydrolase activity, acting on carbon-nitrogen (but not peptide) bonds, in linear amides	21/2955	69/18352	0.00214234	0.0397803	0.0347921	55350/51547/55191/8993/22933/4817/51005/8875/25855/123803/95/83933/23410/51733/79885/51548/8841/4287/10014/9759/8876	21
MF	GO:0016505	peptidase activator activity involved in apoptotic process	9/2955	20/18352	0.0022081	0.0397803	0.0347921	1512/572/400410/4118/1075/834/22861/29108/91662	9
MF	GO:0044769	ATPase activity, coupled to transmembrane movement of ions, rotational mechanism	9/2955	20/18352	0.0022081	0.0397803	0.0347921	527/9114/51382/533/155066/10312/529/535/526	9
MF	GO:0046961	proton-transporting ATPase activity, rotational mechanism	9/2955	20/18352	0.0022081	0.0397803	0.0347921	527/9114/51382/533/155066/10312/529/535/526	9
MF	GO:0004896	cytokine receptor activity	27/2955	97/18352	0.00236534	0.0419574	0.0366962	3577/3579/8807/643/7850/3566/9244/2859/3554/8809/9034/1441/1232/50615/3460/1240/10663/3594/2057/1236/3587/1438/3560/3575/3556/9173/1230	27
MF	GO:0035091	phosphatidylinositol binding	60/2955	262/18352	0.00245436	0.0422971	0.0369933	29907/9885/11152/65258/55062/653361/26207/11033/64342/25851/26100/64333/5333/654816/27111/57649/5338/80183/59338/79792/29886/9854/64411/654817/64853/116985/23001/81846/57732/90203/79856/150684/79156/2314/26499/6642/55876/9026/6386/4643/302/207/79685/221472/22895/54843/3759/3784/29916/6840/79958/2934/23130/26119/23178/4900/4689/10677/822/55803	60
MF	GO:0016810	hydrolase activity, acting on carbon-nitrogen (but not peptide) bonds	32/2955	121/18352	0.00245785	0.0422971	0.0369933	55350/51547/55191/8993/22933/4817/200315/51005/8875/25855/123803/95/11240/383/60489/83933/26873/23410/51733/79885/23569/51548/8841/978/4287/10014/9759/23564/8876/271/9582/9398	32
