# Supplementary material for: Novel Prognostic Signature for Acute Myeloid Leukemia: Bioinformatics Analysis of Combined CNV-Driven and Ferroptosis-Related Genes
Source: Front Genet. 2022 Apr 26;13:849437. doi: 10.3389/fgene.2022.849437 (PMC9086455; doi:10.3389/fgene.2022.849437)
Supplement: Supplementary file 8 [file Table11.xlsx]

## Sheet: sheet 1
Supplementary Table 9. Downregulated with decreased CNV.
C17orf49
OVCA2
GET4
CD68
GTF2IP1
GABARAP
ANKHD1
BRI3
GPS2
MRPS24
GIMAP1-GIMAP5
GIMAP5
INPP5K
LRCH4
CYREN
LSM12
GTF2IRD2B
NDEL1
GTF2IP4
EMC6
CCNJL
MATR3
ANKHD1-EIF4EBP3
NSUN5P2
NCF1
DBNL
GARS1-DT
GTF2IRD2
NAMPT
CYSTM1
IPPK
ATOX1
CYP51A1
ACAP1
ADAP1
BORCS6
PCOLCE
ASGR1
LRWD1
HARS1
CREB5
CYB5R1
NCF1B
ARHGAP26
LAMTOR4
ACY1
CYB5D1
MAD1L1
PHF12
PLEKHM1
ADAM19
ATPAF2
PLD2
ABCB8
KCTD7
MUSTN1
KRT23
DNAJC7
C7orf50
GPR146
ABCC3
MGAM
FLCN
IFT20
CASZ1
FCHSD1
DRG2
AGAP3
ARAP3
NCF1C
EEPD1
AIDA
LUCAT1
EPHA1
P2RX5
BUD31
CCM2
GLRX
HBP1
HOTAIRM1
KCTD11
MANSC1
ENO3
ABHD11
ATG12
GPX3
MLX
BUD23
IRF1
CAST
NPEPPS
HDAC3
AP5Z1
MRPL22
ATG9B
EPN2
DNAJB6
NSUN5
ATP5PO
MGAT1
ATP5MF
APBB3
ASGR2
MARCHF3
CAMKK1
KIF1C
ITGAE
CDRT4
ASL
MYBPC3
ATP6V0A1
HEIH
EIF4EBP3
PILRB
EIF4A1
LINC00957
ABLIM3
JAZF1
PILRA
PHF23
FAM193B
CCDC71L
MAPK7
GADD45G
EPB41L3
FAM153A
FLII
GZMB
ACSL6
ORMDL3
HSD17B1-AS1
DLGAP1-AS1
MKRN1
DOCK4
ITK
GSDMB
CHRNE
CYFIP2
ADIPOR1
NDUFA2
FMC1
FIS1
HEXIM2
PAM
CAMTA2
ATOH8
MRPS33
C7orf61
FAXDC2
AGFG1
MYO1C
NDUFAF3
GIMAP4
NFE4
FKBP9
FMC1-LUC7L2
CAMK4
MOSPD3
CDK5R1
GIMAP1
PLCD3
PCBP4
KPNB1-DT
NAA38
KLRC1
EPB41L4A-AS1
MINK1
ARPC1B
MNT
MCTP1
NT5C3B
DHX58
HDAC5
CD14
CCDC126
ARF5
GZMH
CDK5
ABR
LINC-PINT
DOK3
NSUN5P1
LFNG
ORAI2
GNG11
ACTA2
MGAM2
GPNMB
GPER1
LLCFC1
ITGA2B
ACTA1
CPVL
PGAM2
ACHE
EPHB4
ITGB3
HAVCR2
AQP1
PLIN2
CLEC10A
NME8
ADAP2
PDK4
GPR141
ALOX15B
CARD11
AOAH
FLOT2
HSPB1
