# Supplementary material for: Novel Prognostic Signature for Acute Myeloid Leukemia: Bioinformatics Analysis of Combined CNV-Driven and Ferroptosis-Related Genes
Source: Front Genet. 2022 Apr 26;13:849437. doi: 10.3389/fgene.2022.849437 (PMC9086455; doi:10.3389/fgene.2022.849437)
Supplement: Supplementary file 9 [file Table4.xlsx]

## Sheet: diff_expr
Supplementary Table 2. Differential expression
	logFC	AveExpr	t	P.Value	adj.P.Val	B
MT-TP	11.1547	3.45193	343.075	0	0	1328.5
RPL41P5	6.89653	2.13433	177.103	0	0	1013.28
EEF1G	-7.95119	5.78082	-159.512	0	0	963.264
SPSB3	-5.09845	3.84294	-155.359	0	0	950.666
ZNF410	-3.02312	2.82852	-143.798	0	0	913.79
SNORD62B	6.0528	1.87326	141.871	0	0	907.364
ARL6IP4	-5.30978	4.21934	-132.128	0	0	873.534
ABHD16A	-3.83579	4.04063	-126.711	0	0	853.677
RNASEK	-6.10963	6.3684	-125.864	0	0	850.501
ILK	-4.64353	4.25108	-122.123	0	0	836.218
GUSBP11	-4.04233	3.22027	-120.389	0	0	829.458
C17orf49	-4.75056	3.72049	-119.264	0	0	825.019
TOMM6	-5.14311	3.5517	-117.926	0	0	819.692
POLR2F	-3.97516	2.80168	-117.14	0	0	816.537
MIR590	5.4532	1.68772	115.883	0	0	811.45
CHMP4A	-3.61271	4.01636	-114.347	0	0	805.161
SNORD14A	5.31095	1.64371	113.809	0	0	802.94
SNORD63B	5.96101	1.84485	113.01	0	0	799.619
MIR647	5.2706	1.63122	112.532	0	0	797.625
OVCA2	-3.69528	2.55187	-110.442	0	0	788.808
DIABLO	-2.76164	2.91671	-110.192	0	0	787.744
IKBKG	-3.76244	3.40471	-108.101	0	0	778.744
XBP1	-5.03676	3.47825	-107.505	0	0	776.149
GET4	-3.35	2.83985	-106.932	0	0	773.644
CD68	-6.39058	4.99862	-105.446	0	0	767.083
GTF2IP1	-4.39353	3.1978	-103.49	0	0	758.32
SLX1A	-4.8039	3.35277	-102.407	0	0	753.402
TOP3B	-3.11012	2.32794	-102.184	0	0	752.383
U2AF1	-4.42898	3.54415	-100.982	0	0	746.856
IFI30	-7.86795	6.30425	-100.903	0	0	746.492
RNY4P10	4.31529	1.33562	99.3562	0	0	739.284
EGLN2	-3.96536	4.94464	-98.7611	0	0	736.484
RNU6-1053P	3.88398	1.20217	98.6028	0	0	735.737
PLSCR3	-3.84219	3.04337	-98.3905	0	0	734.733
RCC2	3.80997	4.30139	98.218	0	0	733.915
HNRNPUL2-BSCL2	-3.12972	2.37421	-98.1512	0	0	733.599
PSMD9	-3.4684	3.33671	-98.1443	0	0	733.566
RNU6-125P	4.41841	1.36753	97.9508	0	0	732.647
GABARAP	-6.05875	7.50286	-97.6596	1.97626258336499e-323	7.7271867009571e-321	731.261
EEF1D	-4.17994	6.4021	-97.2826	1.58101006669199e-322	6.02710681361737e-320	729.461
MIR4312	4.77574	1.4781	96.1679	3.39521911822105e-320	1.26277299695837e-317	724.102
SNORD12B	5.89042	1.82301	96.0733	5.36654104512762e-320	1.9484377943225e-317	723.645
POLR2J3	-4.3326	3.83906	-94.0014	1.34941767464075e-315	4.7854116559631e-313	713.524
ANKHD1	-3.20842	3.42039	-93.9904	1.42463066140966e-315	4.93731658087181e-313	713.47
HBA1	-13.3566	11.845	-93.7973	3.70196477438592e-315	1.2544724632116e-312	712.516
LINC01001	-5.9842	4.78651	-93.307	4.2109725977503e-314	1.39593741615422e-311	710.087
TEN1	-3.09633	2.3063	-93.0763	1.3275305884665e-313	4.30713062628198e-311	708.94
CHKB	-3.58416	4.12357	-92.5487	1.85155273954879e-312	5.88215160945408e-310	706.307
NPIPB12	-4.00579	3.25769	-91.8079	7.66468926843695e-311	2.38528e-308	702.587
RN7SL1	-7.9597	5.49676	-90.6769	2.37399e-308	7.24019e-306	696.857
RNU6-595P	4.77828	1.47889	90.5486	4.56945e-308	1.36627e-305	696.202
RNU6-1016P	5.10669	1.5805	90.4687	6.87355e-308	2.01567e-305	695.794
VRK3	-2.64243	3.73619	-89.9099	1.20417e-306	3.46459e-304	692.933
ACAA1	-3.71054	4.97143	-87.1259	2.39703e-300	6.76894e-298	678.44
ZMYM4	2.88457	2.45452	86.9805	5.169e-300	1.43313e-297	677.672
RNU6-850P	4.54573	1.40693	86.8678	9.38609e-300	2.55586e-297	677.076
MIR4292	3.68128	1.13945	86.4672	7.86767e-299	2.10481e-296	674.951
SAP30BP	-2.60912	4.30095	-86.1926	3.39619e-298	8.92906e-296	673.49
KLC1	-2.61066	4.12689	-86.1882	3.47727e-298	8.98727e-296	673.466
U2AF1L5	-4.38335	3.28579	-86.1514	4.2302e-298	1.07511e-295	673.27
MTMR3	-4.3089	4.07856	-85.9446	1.27653e-297	3.19113e-295	672.166
TREX1	-4.02922	2.78248	-85.5931	8.38936e-297	2.06338e-294	670.285
BRI3	-4.97893	5.6744	-85.3168	3.70157e-296	8.95957e-294	668.801
NDUFA11	-4.05091	4.28176	-85.1642	8.42117e-296	2.00647e-293	667.98
POP4	-2.7914	3.23243	-84.9899	2.15566e-295	5.05719e-293	667.04
NDUFA9	-2.86086	3.079	-84.9266	3.03435e-295	7.01074e-293	666.698
CEACAM3	-5.21301	3.9095	-84.7186	9.3497e-295	2.12796e-292	665.574
BANP	-2.47766	2.90932	-84.6009	1.76831e-294	3.96544e-292	664.937
POLD4	-3.78488	4.74357	-84.2953	9.29498e-294	2.05419e-291	663.278
CIDEB	-4.10638	3.23171	-84.0789	3.01913e-293	6.57695e-291	662.101
MIR621	3.87031	1.19794	84.061	3.32701e-293	7.14557e-291	662.004
TM2D3	-2.57815	2.83773	-83.222	3.28815e-291	6.96402e-289	657.412
ARPC4-TTLL3	-3.7818	3.03243	-83.1917	3.88456e-291	8.11448e-289	657.246
GPS2	-3.32572	4.38643	-82.7725	3.9154e-290	8.06838e-288	654.936
SLX1A-SULT1A3	-3.09403	2.19187	-81.8345	7.15327e-288	1.4544e-285	649.731
MRPS24	-3.61857	3.09471	-81.7297	1.28431e-287	2.5769e-285	649.146
RNA5SP82	4.50594	1.39462	81.6764	1.72934e-287	3.42477e-285	648.848
MYB	5.80405	2.95176	81.4933	4.81724e-287	9.4177e-285	647.824
MIA2	-3.09318	2.60075	-81.3095	1.34929e-286	2.60447e-284	646.795
NDUFA7	-3.12278	3.15731	-80.9111	1.26719e-285	2.41542e-283	644.556
MIR5094	2.81497	0.871386	80.7736	2.75174e-285	5.1804e-283	643.781
SNX15	-2.55233	2.10964	-80.5149	1.18702e-284	2.20743e-282	642.319
CAMTA1	-2.63883	2.66903	-80.508	1.23452e-284	2.26809e-282	642.28
CARS1	-2.43498	3.68776	-80.4244	1.9806e-284	3.59549e-282	641.807
UPK3BL1	-4.27716	3.27329	-80.4168	2.06877e-284	3.71138e-282	641.764
MIR570	4.63442	1.43437	80.2692	4.77374e-284	8.4645e-282	640.928
CORO7	-3.90612	4.40539	-80.2341	5.82842e-284	1.02158e-281	640.728
GNL3L	2.96498	2.64609	79.4497	5.09081e-282	8.82156e-280	636.26
ZBED4	2.97569	2.15344	79.4332	5.59626e-282	9.58847e-280	636.165
STAG3L5P-PVRIG2P-PILRB	-3.67733	3.51371	-79.4272	5.79015e-282	9.81044e-280	636.131
NHEJ1	-2.01851	1.62779	-78.7625	2.63805e-280	4.42062e-278	632.313
CXCR1	-7.43226	5.46959	-78.1642	8.40029e-279	1.39235e-276	628.853
WASH6P	-3.74809	3.53615	-78.1264	1.04581e-278	1.71479e-276	628.634
MT-TY	6.59921	2.04233	78.114	1.12435e-278	1.82396e-276	628.562
CLK3	-3.54946	4.70616	-77.9004	3.89183e-278	6.247e-276	627.32
RNU6-531P	4.69331	1.45259	77.8233	6.09404e-278	9.68e-276	626.872
NPIPB5	-3.70541	3.52025	-77.5635	2.77429e-277	4.36135e-275	625.357
PHBP19	2.72803	0.957988	77.4946	4.14946e-277	6.45665e-275	624.954
TAF10	-3.3728	5.461	-77.3403	1.02381e-276	1.57698e-274	624.051
PMM1	-2.71273	2.46452	-77.0677	5.06172e-276	7.71862e-274	622.453
MIR5587	4.50477	1.39426	77.0323	6.23451e-276	9.41288e-274	622.245
MIR186	4.03247	1.24811	76.1996	8.50134e-274	1.27095e-271	617.33
EIF3C	-4.65134	3.90963	-75.9306	4.19997e-273	6.218e-271	615.733
MIR3198-1	4.21973	1.30606	75.8472	6.89791e-273	1.01141e-270	615.237
HAUS7	-2.71233	2.39677	-75.7602	1.15819e-272	1.68202e-270	614.719
MT-ND4	6.03686	12.1648	75.7364	1.33493e-272	1.92041e-270	614.577
ZFPL1	-2.85558	2.95897	-75.6338	2.4614e-272	3.50784e-270	613.965
NAA10	-3.0173	3.99976	-75.4728	6.43677e-272	9.08837e-270	613.004
CCNK	-2.70931	3.18539	-75.0003	1.09327e-270	1.52947e-268	610.172
SPIN1	3.60293	2.64683	74.6577	8.60202e-270	1.19247e-267	608.109
SNORD6	4.05668	1.2556	74.3586	5.24223e-269	7.20168e-267	606.302
ADM	-5.59283	4.35418	-74.2389	1.08283e-268	1.47429e-266	605.577
MICOS10	-2.89186	3.43158	-74.1415	1.95422e-268	2.63717e-266	604.986
KCNJ15	-5.26237	3.7399	-73.3427	2.54488e-266	3.40411e-264	600.117
SNORD100	3.93283	1.21728	73.3153	3.01021e-266	3.99154e-264	599.949
ALKBH6	-2.29417	2.39958	-73.2975	3.35676e-266	4.41269e-264	599.84
RAB4B	-3.5484	4.32133	-73.2843	3.63987e-266	4.74396e-264	599.759
SLX1B	-3.67475	2.57599	-73.2442	4.65194e-266	6.01164e-264	599.514
PNN	3.27523	4.60767	73.0354	1.67638e-265	2.14816e-263	598.232
KHDRBS1	2.4681	4.81936	72.9489	2.85289e-265	3.62531e-263	597.7
ADORA2A	-4.0736	3.01178	-72.886	4.19965e-265	5.2926e-263	597.314
DBNDD2	-2.89424	2.14789	-72.864	4.80954e-265	6.01153e-263	597.178
GIMAP1-GIMAP5	-3.16664	2.1877	-72.8542	5.10905e-265	6.33398e-263	597.118
LIMD1-AS1	-2.25202	1.61593	-72.6822	1.47447e-264	1.81324e-262	596.058
NOMO3	-2.54653	2.16956	-72.5995	2.45777e-264	2.99828e-262	595.547
MT-CO1	6.16489	12.4693	72.551	3.31527e-264	4.01226e-262	595.247
SNF8	-2.30375	4.19909	-72.4111	7.87296e-264	9.45313e-262	594.383
SDHC	-3.4081	4.40811	-72.3666	1.03727e-263	1.23572e-261	594.107
H2AC19	-6.91659	4.86733	-72.3253	1.33964e-263	1.58358e-261	593.851
SKP1	-3.20732	5.4906	-72.3098	1.4744e-263	1.72947e-261	593.755
NDUFA13	-3.6266	4.46918	-71.9625	1.2733e-262	1.48218e-260	591.599
SNORD13E	3.96012	1.22573	71.832	2.86922e-262	3.31461e-260	590.787
SPCS2P4	-2.50562	2.19315	-71.6525	8.79193e-262	1.00803e-259	589.667
ARPIN-AP3S2	-3.06806	2.12548	-71.6382	9.61078e-262	1.09369e-259	589.578
RNU6-879P	3.57366	1.10614	71.4243	3.66064e-261	4.1349e-259	588.24
SNORD117	3.84337	1.1896	71.2749	9.33588e-261	1.04679e-258	587.304
CDC26	-2.35357	3.29195	-71.2412	1.15258e-260	1.2829e-258	587.093
RNU6-118P	4.4895	1.38953	71.2304	1.23368e-260	1.36321e-258	587.025
RNU6-611P	3.78304	1.17093	71.2006	1.4873e-260	1.63165e-258	586.838
BOLA2B	-3.41949	2.44829	-71.1801	1.69173e-260	1.84265e-258	586.709
RNU6-415P	4.35938	1.34927	71.1744	1.75283e-260	1.89567e-258	586.674
ALG13-AS1	3.26786	1.01423	71.0979	2.83501e-260	3.04444e-258	586.193
PUM1	3.01937	3.26541	71.0263	4.44599e-260	4.74104e-258	585.743
RPL23AP64	3.41143	1.47447	70.7406	2.68758e-259	2.84604e-257	583.944
FAM156B	-2.7443	1.9055	-70.6558	4.59014e-259	4.82724e-257	583.408
NOMO2	-2.95374	3.11369	-70.5391	9.60141e-259	1.00282e-256	582.67
ARID1A	3.11079	4.24895	70.4857	1.34532e-258	1.39556e-256	582.333
UHRF1BP1	2.16424	1.52789	70.4599	1.58473e-258	1.6328e-256	582.169
ILF2	2.78935	5.28522	70.3457	3.26579e-258	3.34229e-256	581.446
MTHFS	-4.28764	3.63836	-70.3053	4.2188e-258	4.28883e-256	581.19
MT-TL1	6.68236	2.06806	70.1287	1.29408e-257	1.30685e-255	580.069
MIR4513	3.40554	1.05413	70.1238	1.33556e-257	1.33987e-255	580.037
FAAP20	-3.29633	3.30816	-70.0378	2.30669e-257	2.299e-255	579.491
OSBPL2	-2.69403	3.66282	-69.9752	3.43591e-257	3.40222e-255	579.092
CBWD3	-2.39175	1.75997	-69.9447	4.17336e-257	4.10578e-255	578.898
CDK6	5.62711	2.90977	69.9212	4.84644e-257	4.7374e-255	578.748
LARP1	3.37165	3.89388	69.8583	7.2336e-257	7.02581e-255	578.348
RPP21	-2.71146	2.69531	-69.7699	1.27147e-256	1.22713e-254	577.784
HSPA6	-6.23972	4.90927	-69.7654	1.30804e-256	1.25448e-254	577.755
STK24	-2.6959	3.67924	-69.7102	1.8607e-256	1.77336e-254	577.403
NPIPA9	-4.33933	3.02411	-69.6779	2.28823e-256	2.16728e-254	577.196
POLE3	2.49389	4.22898	69.5655	4.69318e-256	4.41768e-254	576.478
NBPF14	-2.94697	2.60392	-69.4703	8.63075e-256	8.07426e-254	575.868
CBWD5	-2.81705	2.32519	-69.4572	9.38766e-256	8.72881e-254	575.784
RPS12P27	3.29354	1.18935	69.387	1.47158e-255	1.36e-253	575.335
RNF216-IT1	2.69922	0.867416	69.3625	1.72195e-255	1.58181e-253	575.178
HSPE1P27	3.33837	1.05898	69.2785	2.95068e-255	2.6943e-253	574.639
WDR45	-2.88176	4.75928	-69.1757	5.70902e-255	5.18196e-253	573.979
ARFGEF2	2.58961	1.97079	68.853	4.55997e-254	4.1145e-252	571.901
H2AC18	-7.60807	5.33618	-68.8125	5.92209e-254	5.31211e-252	571.639
SERF2	-3.89976	7.34473	-68.8035	6.27392e-254	5.5948e-252	571.581
PSMC1	-3.58403	3.773	-68.3544	1.14771e-252	1.01753e-250	568.674
NPEPL1	-3.44318	3.86156	-68.3061	1.57005e-252	1.38391e-250	568.361
RNU6-199P	3.68076	1.13928	68.2537	2.20632e-252	1.93357e-250	568.021
PPIAP41	3.6218	1.23853	68.2479	2.29071e-252	1.99606e-250	567.983
ISG20	-4.75215	4.49336	-68.2332	2.5203e-252	2.18364e-250	567.888
RNU6-1095P	2.61478	0.809442	68.1618	4.00951e-252	3.45429e-250	567.423
TTC4	-1.57447	1.55429	-68.1513	4.29172e-252	3.67666e-250	567.355
MIR421	4.33508	1.34175	68.1421	4.55782e-252	3.88281e-250	567.295
BORCS8-MEF2B	-3.24566	2.49282	-68.0628	7.6369e-252	6.46973e-250	566.779
FAM177A1	-2.61844	3.36244	-68.021	1.00258e-251	8.44663e-250	566.507
XPO4	2.02525	1.48778	67.9792	1.31605e-251	1.10266e-249	566.235
APEX1	3.43888	5.51156	67.9054	2.12927e-251	1.77428e-249	565.753
MIR3176	3.71237	1.14907	67.8256	3.58463e-251	2.97076e-249	565.232
MIR573	3.35893	1.0397	67.6931	8.52469e-251	7.02665e-249	564.366
KRTCAP2	-3.41685	4.53084	-67.5185	2.67311e-250	2.19152e-248	563.223
TRAPPC4	-2.41134	3.33171	-67.46	3.92131e-250	3.19765e-248	562.839
RAB43	-3.9387	3.00477	-67.4099	5.44634e-250	4.41762e-248	562.511
LINC02887	-4.53366	3.45739	-67.3551	7.80688e-250	6.29879e-248	562.151
HNRNPAB	2.94814	4.93288	67.2651	1.41015e-249	1.13176e-247	561.559
CDK11A	-3.5187	3.85907	-67.2305	1.77033e-249	1.41339e-247	561.332
IPO7	3.20352	2.98957	67.2254	1.83011e-249	1.45351e-247	561.299
NOTCH2NLA	-2.99342	2.29196	-67.2013	2.14477e-249	1.69459e-247	561.14
RPL26P27	1.86344	0.645366	67.151	2.98579e-249	2.34692e-247	560.809
CCZ1	-2.80558	2.66825	-67.0294	6.6515e-249	5.20147e-247	560.008
SYNCRIP	2.6834	3.55008	66.9587	1.06076e-248	8.25283e-247	559.541
RNU6-780P	3.45623	1.06981	66.8945	1.61969e-248	1.25374e-246	559.118
RAB11FIP4	-2.84798	2.42009	-66.8773	1.81468e-248	1.39758e-246	559.004
MOB2	-2.49308	3.54734	-66.654	7.94344e-248	6.08691e-246	557.527
SNORD62A	3.42026	1.05868	66.6317	9.21182e-248	7.02355e-246	557.379
OGFOD2	-2.21524	2.13767	-66.6202	9.93617e-248	7.53814e-246	557.303
LINC00106	3.58801	1.81376	66.5996	1.13952e-247	8.60222e-246	557.166
MIR3682	3.47814	1.07659	66.5445	1.6418e-247	1.23329e-245	556.801
NARF	-3.27096	5.36321	-66.5181	1.95592e-247	1.46205e-245	556.626
ZNF121	2.98061	2.01	66.366	5.36715e-247	3.99238e-245	555.616
CAPRIN1	2.56913	4.68822	66.3398	6.38815e-247	4.72878e-245	555.442
GIMAP5	-3.78879	2.99055	-66.2916	8.79845e-247	6.48153e-245	555.122
GAPDHP61	2.97508	1.0712	66.2726	9.98917e-247	7.32331e-245	554.995
KPNA6	1.61297	3.19628	66.2527	1.13994e-246	8.3172e-245	554.863
CLN3	-2.78662	4.06715	-66.2261	1.36073e-246	9.88081e-245	554.686
SNORA66	3.62331	1.16794	66.0492	4.42172e-246	3.19559e-244	553.507
SMAD2	-2.12891	3.14615	-65.9524	8.4392e-246	6.07025e-244	552.86
SNORD59A	3.54298	1.09665	65.8605	1.55936e-245	1.11637e-243	552.246
SOGA1	2.50161	1.33049	65.7678	2.89773e-245	2.06484e-243	551.626
EEF1A1P3	3.25066	1.16236	65.7516	3.22953e-245	2.29056e-243	551.518
NDUFS7	-3.43414	3.75939	-65.704	4.44186e-245	3.13583e-243	551.199
LIN37	-2.76696	2.5604	-65.4873	1.90101e-244	1.33587e-242	549.745
MMP24OS	-2.79322	3.91915	-65.3718	4.129e-244	2.88821e-242	548.969
FCGR3B	-8.0658	6.08023	-65.3534	4.6734e-244	3.2541e-242	548.845
TRAPPC5	-4.4896	3.69171	-65.351	4.7517e-244	3.29358e-242	548.828
PBRM1	2.53089	2.60547	65.3116	6.19023e-244	4.27126e-242	548.564
WBP2	-3.00386	6.04806	-65.2817	7.57036e-244	5.20002e-242	548.362
DNAJC17	-2.14298	2.7179	-65.199	1.32215e-243	9.04102e-242	547.805
CCZ1B	-2.8648	2.7601	-65.1949	1.35838e-243	9.24729e-242	547.778
YWHAQ	2.72936	5.21173	65.1083	2.43657e-243	1.65135e-241	547.193
SYNE1	-2.95523	2.91471	-65.0744	3.06201e-243	2.06307e-241	546.965
DAPK2	-3.93879	2.92771	-65.074	3.07113e-243	2.06307e-241	546.962
PDS5A	2.61122	3.09133	65.0375	3.92969e-243	2.62824e-241	546.715
SMARCC1	2.80616	3.49692	64.9751	5.98995e-243	3.98868e-241	546.293
HMGN3	3.39369	4.05664	64.8927	1.04542e-242	6.93114e-241	545.736
NEDD8	-2.71402	5.21139	-64.8911	1.0571e-242	6.97823e-241	545.725
TXLNA	2.07534	3.14821	64.8434	1.45924e-242	9.59134e-241	545.403
MAPK13	-3.08588	3.27295	-64.6829	4.33057e-242	2.8342e-240	544.315
SRSF6	3.19864	4.93014	64.6663	4.84476e-242	3.15717e-240	544.202
GNE	1.76202	1.75638	64.6059	7.30171e-242	4.73803e-240	543.792
NUDT22	-2.89946	3.78593	-64.5945	7.88783e-242	5.09668e-240	543.715
RNA5-8SN2	-8.61621	5.96582	-64.5858	8.36797e-242	5.3841e-240	543.656
RNA5-8SN3	-8.60933	5.96795	-64.5215	1.29465e-241	8.295e-240	543.219
ETFB	-3.00307	3.62812	-64.454	2.0493e-241	1.30752e-239	542.76
RNU6-942P	3.39081	1.04957	64.4493	2.1161e-241	1.34452e-239	542.728
SNORA70G	4.43472	1.44175	64.4008	2.94201e-241	1.85435e-239	542.398
PTPRCAP	-5.74613	3.96813	-64.4008	2.94283e-241	1.85435e-239	542.398
RNA5-8SN1	-8.59315	5.97296	-64.3781	3.43392e-241	2.15489e-239	542.243
SNORD12C	3.49493	1.08178	64.373	3.55579e-241	2.22222e-239	542.208
SNORA55	3.62304	1.17841	64.3678	3.68429e-241	2.29314e-239	542.173
MIR1285-1	3.10629	0.961527	64.328	4.82995e-241	2.99398e-239	541.902
SLX1B-SULT1A4	-2.33773	1.62414	-64.2124	1.0621e-240	6.55707e-239	541.114
PIP4K2B	2.4476	3.10889	64.1929	1.21322e-240	7.45981e-239	540.981
NPM1P7	-2.92381	2.0191	-64.0474	3.27655e-240	2.00659e-238	539.987
LAT	-4.30389	3.26384	-64.0385	3.48193e-240	2.12384e-238	539.926
ATXN7L3B	2.34573	2.90346	64.0378	3.49973e-240	2.12619e-238	539.921
SNORD124	2.20002	0.681104	63.8341	1.41043e-239	8.53478e-238	538.527
SNORD11	3.62286	1.12137	63.8138	1.62099e-239	9.77015e-238	538.387
CEP20	2.663	2.5926	63.8128	1.63264e-239	9.8016e-238	538.38
ATP5F1B	2.10721	7.37656	63.7961	1.83073e-239	1.09478e-237	538.266
TBC1D10A	-2.65244	2.84636	-63.753	2.45966e-239	1.46513e-237	537.97
HTATSF1	2.65626	3.01828	63.6885	3.82811e-239	2.2714e-237	537.528
DIP2A-IT1	2.64644	0.896251	63.6713	4.3085e-239	2.54653e-237	537.41
RNU4ATAC12P	3.15588	0.976872	63.5038	1.36305e-238	8.02514e-237	536.257
RNU6-856P	2.38295	0.737707	63.4516	1.95198e-238	1.14484e-236	535.898
CEP85	2.09125	2.38581	63.4106	2.58804e-238	1.51207e-236	535.616
BRCA1P1	4.16172	1.2881	63.3657	3.52597e-238	2.0522e-236	535.307
RNU6-151P	3.71222	1.14902	63.332	4.45066e-238	2.58054e-236	535.074
RNA5SP317	2.87469	0.889867	63.3036	5.41173e-238	3.12589e-236	534.878
EIF3A	3.40988	4.32875	63.2472	7.98576e-238	4.59528e-236	534.489
RNU6-91P	2.54893	0.789065	63.2379	8.5144e-238	4.88106e-236	534.425
RNY4P25	3.27734	1.01446	63.2102	1.03133e-237	5.89017e-236	534.233
RPL23AP42	-4.99456	6.34541	-63.1477	1.58759e-237	9.03324e-236	533.802
CSE1L	2.8108	3.25308	63.1006	2.19899e-237	1.24656e-235	533.476
ANKRD40	1.9132	2.24421	63.0834	2.4775e-237	1.39923e-235	533.356
MIR374B	4.04466	1.25188	63.0472	3.18056e-237	1.78968e-235	533.106
SDR39U1	-2.8483	3.61854	-63.0275	3.64525e-237	2.04362e-235	532.97
SNORD19	3.31939	1.02747	63.0023	4.34235e-237	2.42551e-235	532.795
HEATR5B	2.88287	2.63283	62.982	4.99587e-237	2.78037e-235	532.655
MAVS	2.89535	3.41871	62.8171	1.5674e-236	8.69138e-235	531.511
PHACTR4	2.13395	2.57688	62.7611	2.31186e-236	1.27731e-234	531.122
MPPE1	-3.36445	3.75344	-62.7047	3.42099e-236	1.88327e-234	530.73
MIR3174	3.92647	1.21531	62.6975	3.59692e-236	1.973e-234	530.68
ATRIP	-1.40204	1.15628	-62.678	4.11834e-236	2.25091e-234	530.544
SNORD9	1.94315	0.601623	62.6661	4.47182e-236	2.43539e-234	530.462
PABPC1P1	2.69845	0.913399	62.6069	6.75058e-236	3.66333e-234	530.05
CPSF6	2.6654	3.46944	62.6051	6.83614e-236	3.69661e-234	530.038
ASB3	-1.49529	1.59957	-62.5737	8.50421e-236	4.58236e-234	529.819
SULT1A3	-3.62186	2.56789	-62.5018	1.40328e-235	7.5347e-234	529.318
ZGPAT	-2.39931	3.1644	-62.4847	1.58089e-235	8.45857e-234	529.199
MIR199A1	2.89865	0.897278	62.4841	1.58725e-235	8.46295e-234	529.195
RNU6-1262P	3.03277	0.93878	62.4586	1.89659e-235	1.00771e-233	529.017
TGFBRAP1	3.04961	2.52959	62.4374	2.19888e-235	1.16426e-233	528.869
PSMD13	-1.75525	5.19968	-62.382	3.23421e-235	1.70652e-233	528.483
DERL2	-2.4102	3.75834	-62.3425	4.26326e-235	2.24174e-233	528.206
RABGEF1	-3.29847	2.95836	-62.2924	6.04863e-235	3.16961e-233	527.856
RPRD2	2.1066	2.61554	62.2849	6.37281e-235	3.32805e-233	527.804
SNORD83A	3.39319	1.0503	62.2627	7.43944e-235	3.87181e-233	527.649
ATAD5	2.71551	1.26849	62.2447	8.44134e-235	4.3783e-233	527.523
GAPDHP43	2.32523	0.972991	62.2263	9.5983e-235	4.96151e-233	527.395
MTDH	3.41785	3.73668	62.1699	1.42333e-234	7.33254e-233	527
FAM156A	-2.24693	1.58862	-62.1463	1.67993e-234	8.62532e-233	526.835
SPNS1	-2.64698	2.81137	-62.1039	2.26012e-234	1.15653e-232	526.538
SLC7A6OS	-1.61283	2.08832	-62.094	2.42182e-234	1.23513e-232	526.469
STARD5	-2.33911	1.86316	-62.0832	2.61134e-234	1.32734e-232	526.393
EP300	2.9455	3.51669	62.0004	4.66495e-234	2.36332e-232	525.813
SOD2	-5.34393	6.28991	-61.9892	5.04543e-234	2.54761e-232	525.734
CCDC159	-2.88221	4.34085	-61.9179	8.32421e-234	4.1893e-232	525.233
SARNP	-2.8279	2.64	-61.8809	1.07898e-233	5.4123e-232	524.974
ZBTB12BP	1.95929	0.769489	61.8697	1.1675e-233	5.83711e-232	524.895
MT-ND5	4.09254	8.90265	61.8387	1.45091e-233	7.23039e-232	524.678
APPL1	2.71616	2.5707	61.7737	2.29151e-233	1.13822e-231	524.22
NDST2	-3.18876	3.38966	-61.5392	1.19436e-232	5.91326e-231	522.569
TMEM120A	-4.06971	4.87041	-61.4528	2.19739e-232	1.0844e-230	521.959
ESYT2	3.57144	3.79989	61.4008	3.17245e-232	1.56054e-230	521.591
WASH7P	-2.61154	2.62631	-61.3794	3.68916e-232	1.80887e-230	521.441
ZKSCAN8	2.54436	2.13503	61.3393	4.89649e-232	2.39316e-230	521.157
CPT1A	3.21753	4.03193	61.226	1.0919e-231	5.31963e-230	520.355
STK19	-2.13867	2.70319	-61.1974	1.33657e-231	6.49086e-230	520.153
MRPL53	-2.83771	3.48683	-61.1562	1.78962e-231	8.66349e-230	519.861
TRRAP	2.58593	2.36692	61.1332	2.10605e-231	1.0163e-229	519.698
INPP5K	-2.37118	4.04907	-61.0925	2.80995e-231	1.3517e-229	519.409
IRF9	-3.44002	4.94108	-61.0873	2.91589e-231	1.39825e-229	519.372
AP1M1	-2.22533	4.08015	-61.025	4.53614e-231	2.16839e-229	518.93
RNU4ATAC11P	3.49553	1.08197	61.0191	4.73061e-231	2.25428e-229	518.888
PTPN11	2.53682	2.60978	61.0182	4.76225e-231	2.26229e-229	518.882
TMED3	-2.3895	2.83916	-60.9935	5.67431e-231	2.68719e-229	518.706
SLC15A3	-4.7623	4.4182	-60.9832	6.10196e-231	2.88077e-229	518.634
RPN2	3.04851	5.6765	60.9287	8.98667e-231	4.22956e-229	518.246
PIKFYVE	2.96043	2.64319	60.9231	9.35464e-231	4.3892e-229	518.206
STARD7	2.27347	4.19127	60.9139	9.98654e-231	4.67131e-229	518.141
NOLC1	3.13493	3.48743	60.866	1.4034e-230	6.54448e-229	517.8
UPF3B	2.55251	2.38136	60.8607	1.45728e-230	6.77502e-229	517.763
SRSF1	2.73621	4.94422	60.8389	1.70264e-230	7.89167e-229	517.607
ATP5PDP4	4.16328	1.69456	60.664	5.91287e-230	2.73228e-228	516.361
FOXP1-AS1	2.44311	0.781573	60.61	8.69424e-230	4.00539e-228	515.976
ATP6V0C	-4.085	6.52659	-60.5829	1.05473e-229	4.84447e-228	515.782
SRP72	2.65047	4.14949	60.5215	1.6343e-229	7.4839e-228	515.344
POLH	2.05228	2.00443	60.5	1.90677e-229	8.70551e-228	515.19
MAT2A	3.73631	5.22245	60.454	2.64873e-229	1.20569e-227	514.861
DCAF7	2.44494	3.88545	60.4507	2.71173e-229	1.23069e-227	514.838
LINC00869	-2.65551	2.82909	-60.4322	3.09559e-229	1.40073e-227	514.705
RFX7	2.52354	1.58869	60.4025	3.82665e-229	1.72641e-227	514.493
GOLPH3	2.90774	4.17456	60.3622	5.10701e-229	2.29725e-227	514.204
ARFRP1	-2.11913	3.00892	-60.2842	8.92313e-229	4.00202e-227	513.646
CANX	3.22046	5.4578	60.2792	9.24921e-229	4.13611e-227	513.61
DNAJB2	-3.60769	3.82816	-60.2032	1.59493e-228	7.11142e-227	513.065
CHD1L	2.66156	3.56301	60.1223	2.84906e-228	1.26663e-226	512.485
MFSD4B	1.72722	1.0938	60.1067	3.18711e-228	1.4128e-226	512.372
HCFC1	3.04144	3.7388	60.0901	3.59098e-228	1.58722e-226	512.253
MIR5194	4.23799	1.33692	60.0412	5.10316e-228	2.24908e-226	511.902
RNU7-40P	3.2109	0.993899	60.0148	6.16852e-228	2.71077e-226	511.712
MEI1	-2.91447	2.83314	-59.9934	7.19078e-228	3.15092e-226	511.558
YWHAG	2.84679	4.22736	59.9709	8.45329e-228	3.69353e-226	511.397
OTUD4	2.45023	2.23281	59.9617	9.03193e-228	3.93508e-226	511.33
H4C14	-3.03439	2.15088	-59.8967	1.44267e-227	6.26759e-226	510.862
SMC3	2.99447	3.18329	59.8853	1.56565e-227	6.78255e-226	510.78
PDLIM2	-3.36466	3.61075	-59.8396	2.17496e-227	9.39545e-226	510.451
HINFP	-1.69438	2.6163	-59.7935	3.03248e-227	1.30628e-225	510.119
WDR43	2.53761	2.43573	59.7865	3.19052e-227	1.37048e-225	510.068
RBM34	-2.17373	2.70742	-59.7579	3.91955e-227	1.67891e-225	509.862
EIF2S3	2.5871	5.43543	59.7552	3.99641e-227	1.70704e-225	509.842
WASH9P	-2.79542	3.02425	-59.7481	4.2071e-227	1.79201e-225	509.791
RBM14	2.6776	4.2403	59.7368	4.56535e-227	1.93919e-225	509.709
CSNK1D	-2.66317	5.55368	-59.6378	9.32758e-227	3.95101e-225	508.994
NEMP1	2.65712	1.98142	59.5518	1.73671e-226	7.33603e-225	508.373
GANAB	2.93801	5.7085	59.5512	1.74442e-226	7.34826e-225	508.368
C11orf98	-3.02874	3.50966	-59.5196	2.19124e-226	9.20502e-225	508.14
RASA4	-2.98473	2.19415	-59.5008	2.51018e-226	1.05159e-224	508.004
NOL12	-2.41535	2.88746	-59.4807	2.90319e-226	1.2129e-224	507.859
CHFR	-2.10486	3.37612	-59.4687	3.16667e-226	1.31936e-224	507.772
RNU7-3P	2.9015	0.898161	59.4489	3.65672e-226	1.51938e-224	507.628
UFD1	-2.24646	3.83939	-59.4477	3.68733e-226	1.52794e-224	507.619
LEO1	2.08422	2.32509	59.4398	3.90524e-226	1.61385e-224	507.562
SNORD101	3.75898	1.16349	59.4383	3.94624e-226	1.62638e-224	507.551
NPIPB3	-2.91708	3.39715	-59.3092	1.00618e-225	4.13563e-224	506.615
BECN1	-2.07465	3.7504	-59.3076	1.01765e-225	4.17156e-224	506.604
SNORA1B	4.77158	1.5559	59.2788	1.25448e-225	5.12855e-224	506.394
SLC16A3	-4.81148	5.8321	-59.262	1.41676e-225	5.77652e-224	506.273
ZNF609	2.7772	2.68813	59.223	1.87988e-225	7.64436e-224	505.99
NPIPA1	-3.19705	2.68058	-59.1908	2.37599e-225	9.63602e-224	505.755
EPN1	-3.1014	4.19604	-59.1609	2.9529e-225	1.1944e-223	505.538
SNORD69	3.347	1.03601	59.1355	3.55127e-225	1.43263e-223	505.353
SP110	-2.98193	4.07833	-59.1342	3.58434e-225	1.44215e-223	505.344
C18orf32	-3.2019	2.92729	-59.1107	4.25067e-225	1.70575e-223	505.173
UBE2F	-2.98946	4.23296	-59.1011	4.55809e-225	1.82431e-223	505.104
FTH1	-5.31422	11.0387	-59.0995	4.61225e-225	1.84116e-223	505.092
TUG1	2.71828	4.40026	59.0861	5.08435e-225	2.02431e-223	504.994
MIRLET7D	3.02639	0.936804	59.0211	8.16114e-225	3.24086e-223	504.521
RNU6-672P	3.18772	0.986726	59.0207	8.18295e-225	3.24109e-223	504.518
PRPF4B	2.43027	3.55231	58.982	1.08462e-224	4.28482e-223	504.236
TMEM106A	3.1444	2.80731	58.9515	1.35434e-224	5.33652e-223	504.014
TOP2B	2.78611	4.82388	58.9392	1.48177e-224	5.82357e-223	503.924
HBA2	-10.5412	13.4703	-58.9108	1.82188e-224	7.14187e-223	503.717
WDR73	-1.57685	1.98477	-58.8858	2.18585e-224	8.54668e-223	503.535
WASH3P	-2.68831	3.57998	-58.8804	2.27438e-224	8.87007e-223	503.495
ESF1	2.34477	1.44999	58.7318	6.72632e-224	2.61657e-222	502.41
SMIM12	-2.31479	3.13538	-58.7251	7.06631e-224	2.74184e-222	502.361
DDT	-3.1571	3.95376	-58.6797	9.84582e-224	3.81063e-222	502.029
IGFLR1	-3.75112	3.87243	-58.6153	1.57757e-223	6.0902e-222	501.558
JARID2	2.91007	3.57328	58.5788	2.0598e-223	7.93179e-222	501.291
PINK1	-3.98355	3.98408	-58.5569	2.41832e-223	9.28891e-222	501.13
MT-TF	5.94249	1.83912	58.5532	2.48491e-223	9.52071e-222	501.103
EIF3CL	-3.19434	2.33279	-58.5462	2.61487e-223	9.99353e-222	501.052
ACLY	2.17865	4.06151	58.5252	3.05015e-223	1.16279e-221	500.898
GBF1	1.93826	3.45516	58.5238	3.08243e-223	1.17217e-221	500.887
UBE2Q2	2.60961	2.78113	58.523	3.0995e-223	1.17573e-221	500.882
RNU4ATAC18P	2.9941	0.95561	58.4692	4.59755e-223	1.73966e-221	500.487
COX6CP14	2.33828	0.740141	58.4536	5.15388e-223	1.94533e-221	500.373
CCAR1	2.90705	3.32006	58.4106	7.06533e-223	2.66023e-221	500.058
UPF2	2.71707	3.26936	58.4091	7.14339e-223	2.683e-221	500.047
SEC14L1	-3.72904	5.10259	-58.3743	9.22006e-223	3.45446e-221	499.791
DDX21	3.44111	3.84643	58.3444	1.14878e-222	4.29358e-221	499.571
ADNP	2.67286	3.1648	58.2841	1.78899e-222	6.67002e-221	499.128
INO80B	-2.49317	2.85882	-58.2599	2.13733e-222	7.94931e-221	498.95
RNU6-1048P	2.2578	0.698984	58.2307	2.64813e-222	9.82512e-221	498.736
ELOF1	-2.9533	3.81799	-58.2197	2.87112e-222	1.06266e-220	498.655
INO80B-WBP1	-2.64582	1.84467	-58.187	3.65309e-222	1.34881e-220	498.414
BAZ1B	2.25936	3.00729	58.1263	5.70933e-222	2.09864e-220	497.967
RN7SL558P	2.82736	1.04922	58.1263	5.71144e-222	2.09864e-220	497.967
UNC119	-3.2723	4.30596	-58.1065	6.60571e-222	2.42141e-220	497.821
SULT1A4	-3.72798	2.5848	-58.0119	1.32614e-221	4.84947e-220	497.124
FAM168B	1.70711	3.3241	58.0021	1.42572e-221	5.20113e-220	497.051
RNU6-890P	2.54349	0.787384	57.9636	1.89394e-221	6.89277e-220	496.767
DCTN3	-2.23039	4.25747	-57.9536	2.03974e-221	7.40573e-220	496.693
MIR4755	2.73213	0.845753	57.9365	2.31404e-221	8.38166e-220	496.567
CHAMP1	2.22504	2.20648	57.9158	2.69584e-221	9.74142e-220	496.414
LINC01145	-2.61306	2.59929	-57.8714	3.74063e-221	1.34848e-219	496.086
MLLT10	2.35073	2.93821	57.7946	6.60267e-221	2.37462e-219	495.518
CBWD1	-1.93872	1.80148	-57.7911	6.77517e-221	2.43093e-219	495.492
SRCAP	2.56991	3.4624	57.724	1.11309e-220	3.9844e-219	494.995
OCRL	2.00443	1.69205	57.7061	1.27006e-220	4.53563e-219	494.863
NUTM2B-AS1	-2.36668	2.86338	-57.6715	1.64123e-220	5.84744e-219	494.607
VNN3	-4.28487	3.48937	-57.6674	1.6924e-220	6.01573e-219	494.576
NDC1	2.32491	1.67166	57.6377	2.1083e-220	7.47661e-219	494.356
CCDC32	-1.61954	2.43506	-57.5675	3.54908e-220	1.25568e-218	493.835
RAB43P1	-3.22846	2.62173	-57.5165	5.17796e-220	1.82775e-218	493.457
RPS11P5	3.27271	2.07048	57.4573	8.03921e-220	2.83118e-218	493.017
GCHFR	-2.77353	2.34463	-57.4457	8.76102e-220	3.07827e-218	492.931
POLR1H	-2.30296	3.11949	-57.4432	8.92785e-220	3.12967e-218	492.912
DCP1A	1.88152	2.4632	57.4135	1.11313e-219	3.89315e-218	492.691
RPSAP58	-4.16123	3.04424	-57.4102	1.14025e-219	3.97886e-218	492.667
RBM26	2.45952	3.13827	57.4008	1.2232e-219	4.25859e-218	492.597
NTMT1	-2.30624	2.64631	-57.3727	1.50767e-219	5.23701e-218	492.388
TGOLN2	2.45378	5.49792	57.2676	3.29419e-219	1.14038e-217	491.606
NDUFB8	-2.27982	4.61945	-57.2675	3.29797e-219	1.14038e-217	491.605
PUM2	2.60727	3.86084	57.2234	4.57936e-219	1.57988e-217	491.276
TRAPPC2L	-2.32702	3.06988	-57.2228	4.5995e-219	1.58325e-217	491.272
MAEA	-2.66175	4.32762	-57.214	4.91242e-219	1.68715e-217	491.206
LRRC58	2.8158	1.96218	57.208	5.13418e-219	1.75935e-217	491.162
RPL21P16	-4.99915	5.40065	-57.16	7.34205e-219	2.51029e-217	490.804
NOSIP	-2.96541	4.50199	-57.1375	8.6846e-219	2.96267e-217	490.636
CPXM1	5.51847	2.31815	57.1326	9.01194e-219	3.06748e-217	490.599
SNORA70B	2.09504	0.64862	57.132	9.04835e-219	3.07301e-217	490.595
NOP14	2.10892	2.92878	57.0917	1.22189e-218	4.14059e-217	490.294
TAF11	1.82953	3.34309	57.08	1.3334e-218	4.50842e-217	490.207
SNORD71	3.08823	0.955939	57.0652	1.48997e-218	5.02666e-217	490.096
GOSR2	-1.63774	2.74576	-57.0265	1.98883e-218	6.69484e-217	489.807
MIR4435-2HG	-3.69594	3.84058	-56.9778	2.86087e-218	9.60913e-217	489.443
SNORA28	3.50853	1.11644	56.9522	3.46409e-218	1.16097e-216	489.252
CTCF	1.75985	3.58563	56.9464	3.61855e-218	1.21007e-216	489.208
CSNK2B	-2.20768	5.51324	-56.9282	4.14577e-218	1.38334e-216	489.072
WIPI1	-3.2909	3.63316	-56.8635	6.72646e-218	2.23956e-216	488.588
MCTS2P	2.53764	1.52336	56.7787	1.26902e-217	4.21597e-216	487.953
LRCH4	-3.06899	5.5746	-56.7181	1.9986e-217	6.62534e-216	487.498
MIR553	2.79256	0.864453	56.7012	2.2698e-217	7.50807e-216	487.371
YTHDF1	1.63735	3.35179	56.6657	2.96112e-217	9.77362e-216	487.105
TTC19	2.07759	2.59359	56.6545	3.22118e-217	1.0609e-215	487.021
RNA5SP78	2.8012	0.867126	56.5896	5.24531e-217	1.72383e-215	486.533
CYREN	-2.65356	3.80363	-56.5829	5.51375e-217	1.80815e-215	486.483
PIK3R2	-2.0483	1.60096	-56.5313	8.12848e-217	2.6599e-215	486.094
VPS36	2.34071	2.93484	56.5275	8.36501e-217	2.73144e-215	486.066
NRAS	2.647	2.87903	56.4906	1.10346e-216	3.59543e-215	485.789
THAP3	-2.14698	2.34301	-56.4517	1.47869e-216	4.80778e-215	485.496
BCKDHA	-2.54948	2.88656	-56.4331	1.70125e-216	5.51966e-215	485.355
GPATCH11	2.28423	1.79097	56.4318	1.71803e-216	5.56224e-215	485.346
ISY1-RAB43	-2.84465	1.96782	-56.4263	1.79004e-216	5.78312e-215	485.305
TMEM185A	-1.61631	2.01207	-56.4219	1.84986e-216	5.96374e-215	485.272
ARL4AP4	2.98038	1.00151	56.3672	2.79452e-216	8.9902e-215	484.859
LILRB3	-5.71057	6.00332	-56.321	3.95635e-216	1.27011e-214	484.511
CYTOR	-3.12744	3.63862	-56.2917	4.93526e-216	1.58104e-214	484.29
NAA35	1.59616	1.82238	56.2577	6.37543e-216	2.03813e-214	484.034
LSM12	-1.83028	2.87364	-56.2378	7.41113e-216	2.36427e-214	483.883
FAM157C	-4.55525	3.71315	-56.196	1.01608e-215	3.2347e-214	483.567
MT-TC	4.83683	1.497	56.1726	1.21223e-215	3.85112e-214	483.391
RPL10P12	3.60132	1.45788	56.1378	1.57634e-215	4.99744e-214	483.128
TTN-AS1	-2.77718	2.54502	-56.1255	1.73033e-215	5.47422e-214	483.035
NUDT13	1.77824	1.28541	56.121	1.78985e-215	5.65082e-214	483.001
MLEC	2.85054	3.828	56.1205	1.79678e-215	5.66098e-214	482.997
RN7SL246P	2.15039	0.696089	56.1153	1.86878e-215	5.87568e-214	482.958
NRIP2	1.66737	1.23218	56.1092	1.95626e-215	6.13808e-214	482.912
TMEM134	-2.63824	2.98312	-56.0961	2.16008e-215	6.76367e-214	482.813
TMCC3	-3.14038	2.44827	-56.0931	2.21072e-215	6.90806e-214	482.789
GTF2IRD2B	-1.95741	1.98489	-56.0823	2.39734e-215	7.47589e-214	482.708
NDUFA3	-2.98687	4.67809	-56.0742	2.55051e-215	7.93729e-214	482.646
ZNF821	-1.70769	1.5085	-56.0679	2.67459e-215	8.30648e-214	482.599
GATD3B	-3.03376	2.69289	-56.0414	3.26872e-215	1.0131e-213	482.398
RNU6-375P	2.14037	0.662648	56.0249	3.70269e-215	1.14528e-213	482.273
RREB1	2.36807	2.51851	56.0208	3.81874e-215	1.17879e-213	482.243
POR	-3.93036	4.76209	-55.9913	4.77214e-215	1.47011e-213	482.02
TUBA4A	-4.88858	5.99501	-55.9881	4.89242e-215	1.50412e-213	481.995
RPL32P29	-3.10008	2.14084	-55.9798	5.20784e-215	1.59787e-213	481.932
HM13-IT1	2.99848	1.60833	55.9747	5.41242e-215	1.65731e-213	481.894
MIR3609	5.12873	1.58732	55.9626	5.93094e-215	1.81244e-213	481.802
MIR548AA1	3.42244	1.05935	55.9163	8.42456e-215	2.56932e-213	481.451
MTG2	-2.20072	3.14787	-55.9148	8.52068e-215	2.59345e-213	481.44
CNTRL	2.67506	3.30051	55.9049	9.18539e-215	2.7902e-213	481.364
TBCB	-2.59832	4.75726	-55.9029	9.32589e-215	2.82725e-213	481.349
HNRNPA1P14	2.05905	0.671954	55.8974	9.7212e-215	2.94124e-213	481.308
METAP1	1.9753	2.93183	55.8622	1.26953e-214	3.83347e-213	481.041
RNA5SP307	3.81019	1.19291	55.8594	1.29654e-214	3.90731e-213	481.019
MIR3679	2.61771	0.810349	55.8445	1.45186e-214	4.36675e-213	480.906
C15orf40	-1.83794	2.01357	-55.8328	1.58653e-214	4.76239e-213	480.818
MIR25	3.28486	1.01678	55.8308	1.61041e-214	4.82458e-213	480.803
DTX2	-2.58142	3.31414	-55.8299	1.62233e-214	4.85078e-213	480.795
NCBP1	2.0551	2.60981	55.8259	1.67209e-214	4.98976e-213	480.765
MIR616	3.81585	1.18109	55.7849	2.2816e-214	6.79532e-213	480.454
TNFRSF10C	-5.85967	4.97177	-55.7546	2.87189e-214	8.53674e-213	480.224
PCBP1-AS1	-2.68139	3.37866	-55.7327	3.39295e-214	1.0066e-212	480.057
ZFP36L2	4.35391	5.84825	55.718	3.79323e-214	1.12316e-212	479.945
RNU6-510P	3.31226	1.02526	55.6871	4.79563e-214	1.41722e-212	479.711
MIR5584	5.26978	1.63097	55.6576	6.00266e-214	1.7705e-212	479.486
CDC42-IT1	2.65057	0.984644	55.5747	1.1278e-213	3.32004e-212	478.855
RPL39P14	2.2126	0.684997	55.574	1.13388e-213	3.33152e-212	478.85
OSBP	1.41507	2.73864	55.5511	1.34899e-213	3.95592e-212	478.676
DIS3L	1.94827	2.43994	55.5384	1.48639e-213	4.35047e-212	478.579
MGA	2.36524	1.75757	55.5166	1.7545e-213	5.12535e-212	478.413
TADA1	1.71063	1.66757	55.5071	1.88691e-213	5.50162e-212	478.34
MFSD13B	2.2747	0.773505	55.5032	1.94318e-213	5.65488e-212	478.311
STARD10	-3.69546	3.1281	-55.5026	1.95192e-213	5.66949e-212	478.306
RAB24	-3.69525	4.87261	-55.5002	1.98797e-213	5.76323e-212	478.288
SETDB2	2.15007	1.96293	55.4959	2.0551e-213	5.94652e-212	478.255
PRORP	-1.8247	2.37495	-55.485	2.23247e-213	6.44754e-212	478.172
RPL23AP82	-1.79116	1.74232	-55.4694	2.51444e-213	7.24816e-212	478.053
DLSTP1	1.57576	0.727602	55.4395	3.1581e-213	9.08639e-212	477.825
SOX4	4.82051	2.27466	55.4226	3.59213e-213	1.03157e-211	477.696
SNORD99	3.3457	1.03561	55.3926	4.51465e-213	1.29406e-211	477.467
AMZ2	-1.91	3.78261	-55.3498	6.26225e-213	1.79161e-211	477.14
SMARCAD1	2.51532	1.84129	55.3455	6.47144e-213	1.848e-211	477.107
MIR6739	2.07311	0.641835	55.314	8.23126e-213	2.34614e-211	476.866
FAM98C	-2.16325	2.66839	-55.3022	9.00323e-213	2.56139e-211	476.777
GOPC	2.31237	2.10974	55.2597	1.24543e-212	3.53661e-211	476.452
DENR	2.2619	3.07943	55.1383	3.15409e-212	8.9399e-211	475.522
NDEL1	-2.79376	4.7072	-55.0937	4.43522e-212	1.25478e-210	475.181
SEC61A1	1.78757	5.1861	55.0889	4.6026e-212	1.29972e-210	475.144
RPS27AP7	2.65168	0.970945	55.0627	5.62354e-212	1.58509e-210	474.944
RNA5SP474	2.11188	0.653833	55.0451	6.43652e-212	1.8109e-210	474.808
MIR378J	3.15029	1.01573	55.0391	6.74273e-212	1.89355e-210	474.762
WDR13	-2.91446	4.24701	-55.0375	6.82482e-212	1.91308e-210	474.75
SCCPDH	3.30094	3.06245	54.9925	9.63292e-212	2.69527e-210	474.405
BEST1	-3.49099	3.13399	-54.9615	1.2224e-211	3.41398e-210	474.167
CMTM2	-5.83403	4.59365	-54.9201	1.67982e-211	4.68293e-210	473.849
TFCP2	1.97963	2.99072	54.9002	1.95709e-211	5.44593e-210	473.696
FCF1P7	2.21877	0.814464	54.8972	2.00226e-211	5.56148e-210	473.673
CRIP1	-4.93261	4.54005	-54.895	2.03594e-211	5.64474e-210	473.656
CMC4	-1.60201	1.11358	-54.8491	2.89707e-211	8.01767e-210	473.303
RNU4-89P	2.97635	0.971065	54.8445	2.99999e-211	8.28747e-210	473.268
SH3BP5	-3.50781	3.11076	-54.8321	3.30219e-211	9.1058e-210	473.172
STIMATE	-2.80806	2.36885	-54.8308	3.33411e-211	9.17723e-210	473.163
TM9SF3	2.32267	3.55378	54.8271	3.43145e-211	9.42813e-210	473.134
SCAF8	2.00535	2.87073	54.7671	5.44018e-211	1.49204e-209	472.673
ZNF146	3.08164	2.88171	54.6735	1.11805e-210	3.06089e-209	471.952
RNA5SP283	4.30665	1.35634	54.6486	1.35512e-210	3.70326e-209	471.76
UPP1	-5.09453	5.24399	-54.6428	1.41615e-210	3.86312e-209	471.715
GK	-3.36132	3.73376	-54.6377	1.47341e-210	4.01215e-209	471.676
ATP6V0D1	-3.44587	5.64081	-54.6292	1.57304e-210	4.27581e-209	471.61
LEMD2	-1.90976	3.96628	-54.606	1.88062e-210	5.10278e-209	471.432
WASF2	2.48272	5.53615	54.6047	1.89954e-210	5.14496e-209	471.422
RPS19BP1	-2.5019	3.8537	-54.5892	2.14066e-210	5.78775e-209	471.302
FAM131A	-2.04228	2.25132	-54.5792	2.31291e-210	6.24027e-209	471.225
SIRT7	-2.53259	3.95288	-54.579	2.31621e-210	6.24027e-209	471.223
HLA-F	-4.57275	5.83764	-54.5444	3.02597e-210	8.13809e-209	470.956
SELENOW	-3.04956	4.11645	-54.5339	3.28126e-210	8.80915e-209	470.875
FFAR2	-5.32754	4.28425	-54.4994	4.27958e-210	1.14691e-208	470.609
5_8S_rRNA	-3.15772	2.20521	-54.475	5.16743e-210	1.38242e-208	470.42
RNU7-75P	2.85772	0.884613	54.4555	6.00844e-210	1.6046e-208	470.269
YTHDF2	1.78166	3.75208	54.452	6.17063e-210	1.64503e-208	470.243
USO1	2.48379	3.18026	54.4388	6.83738e-210	1.8196e-208	470.14
MUC20-OT1	-2.39468	3.15056	-54.4216	7.80524e-210	2.07356e-208	470.008
MPHOSPH6P1	3.26706	1.23324	54.3959	9.52081e-210	2.52492e-208	469.809
RPL12P16	-2.88418	1.99174	-54.3954	9.56081e-210	2.53113e-208	469.805
CAPN3	-2.72396	2.61466	-54.356	1.29584e-209	3.42465e-208	469.5
UBE2V1	-2.3506	4.08944	-54.354	1.31641e-209	3.47299e-208	469.485
RBM4	-2.3353	4.47313	-54.2939	2.09598e-209	5.52013e-208	469.019
GTF2IP4	-3.29533	3.3174	-54.2906	2.15042e-209	5.65375e-208	468.994
BDP1	2.41029	1.85151	54.2875	2.20251e-209	5.78075e-208	468.97
CPT1B	-2.86445	3.07095	-54.2517	2.90617e-209	7.61447e-208	468.692
ANKRD52	1.80308	2.41993	54.181	5.02332e-209	1.3139e-207	468.145
MMP9	-6.52633	5.29306	-54.1734	5.33104e-209	1.392e-207	468.085
SRPRA	1.60152	5.22489	54.1486	6.45832e-209	1.68347e-207	467.893
FUNDC2	-3.21971	3.64189	-54.1462	6.57943e-209	1.71211e-207	467.875
NDUFV2	-2.14196	3.98361	-54.1289	7.52852e-209	1.95575e-207	467.74
ADGRG3	-5.37633	5.88861	-54.1219	7.94875e-209	2.0614e-207	467.685
COQ6	-1.45617	1.90837	-54.104	9.13045e-209	2.36384e-207	467.547
RPL36AP15	2.62242	0.913926	54.0968	9.65287e-209	2.49486e-207	467.491
ZC3H13	2.2365	2.63928	54.0795	1.10432e-208	2.84937e-207	467.356
PDE4DIP	-2.08082	1.83628	-54.0744	1.14878e-208	2.95908e-207	467.317
MRPS11	-1.94137	2.87694	-54.0737	1.15481e-208	2.96959e-207	467.312
PLEKHJ1	-2.45021	3.61329	-54.033	1.58408e-208	4.0666e-207	466.995
ANKRD17	2.34576	3.07924	54.023	1.71192e-208	4.3874e-207	466.918
ASLP1	2.30809	0.910181	54.0039	1.98677e-208	5.08327e-207	466.769
YPEL3	-3.85298	6.7896	-54.0034	1.99393e-208	5.09304e-207	466.765
EEF1A1P4	1.75796	0.643353	54.003	2.00087e-208	5.10221e-207	466.762
CINP	-2.07296	3.03508	-53.9868	2.26835e-208	5.77463e-207	466.636
FAM20B	1.97943	2.18174	53.9802	2.38823e-208	6.06722e-207	466.585
RNU6-101P	2.69473	0.83418	53.98	2.39124e-208	6.06722e-207	466.583
HMGN2P28	2.23695	0.744689	53.9625	2.73943e-208	6.93913e-207	466.447
PLA2G4B	-2.57143	2.0115	-53.9609	2.77405e-208	7.01518e-207	466.435
TOMM20	2.7248	4.34551	53.9595	2.8049e-208	7.08144e-207	466.424
PRR13	-2.75291	7.03729	-53.8873	4.91719e-208	1.23938e-206	465.862
RHOF	-3.15247	2.76232	-53.8779	5.28934e-208	1.33098e-206	465.789
DGAT2	-5.43288	4.1599	-53.8441	6.88367e-208	1.72931e-206	465.525
SNORD46	2.7369	0.862179	53.839	7.16356e-208	1.79666e-206	465.485
XPO6	-3.38655	7.24457	-53.8333	7.48893e-208	1.87518e-206	465.441
MIR576	2.81022	0.869917	53.7735	1.19348e-207	2.9835e-206	464.975
NUP160	2.23544	2.40823	53.7538	1.39097e-207	3.47151e-206	464.821
IFITM2	-5.62228	10.5804	-53.7062	2.01557e-207	5.02214e-206	464.45
CNOT11	1.72317	3.62125	53.6987	2.13729e-207	5.31674e-206	464.392
R3HDM4	-3.23785	7.25371	-53.6898	2.29198e-207	5.69224e-206	464.322
GOLIM4	2.53165	1.65291	53.6798	2.47793e-207	6.14406e-206	464.244
NBPF10	-2.17088	1.7068	-53.6649	2.78252e-207	6.88809e-206	464.128
GOLGA3	1.7128	2.51938	53.6195	3.96541e-207	9.80041e-206	463.773
POLR3C	1.59895	3.25687	53.5873	5.10224e-207	1.25897e-205	463.521
SNRPGP14	2.02127	0.661927	53.5793	5.42806e-207	1.3372e-205	463.459
MIR135A1	2.01882	0.625035	53.5602	6.30415e-207	1.55052e-205	463.309
RPL7AP60	1.44519	0.58854	53.5168	8.84967e-207	2.17308e-205	462.97
ZC3HAV1L	2.70065	1.00081	53.4954	1.04634e-206	2.56521e-205	462.802
MTND4P12	6.08034	2.176	53.4876	1.11199e-206	2.7218e-205	462.741
EOLA1	-1.9172	2.48947	-53.4605	1.37499e-206	3.36014e-205	462.529
CCNJ	1.91712	1.43073	53.4451	1.55038e-206	3.78267e-205	462.409
THRAP3	1.83678	4.77972	53.4388	1.62871e-206	3.96745e-205	462.36
VOPP1	-2.97481	3.39989	-53.4237	1.83333e-206	4.45876e-205	462.241
ZBP1	-3.41383	2.76397	-53.4156	1.95359e-206	4.74368e-205	462.178
KPNA3	1.8843	2.57391	53.4108	2.02907e-206	4.91912e-205	462.14
TOMM70	2.00872	2.40937	53.3907	2.37395e-206	5.74609e-205	461.983
WDR75	2.06748	2.37625	53.3544	3.15548e-206	7.62566e-205	461.698
TOB2	2.17365	2.74031	53.2986	4.88589e-206	1.17888e-204	461.26
MIR645	2.43505	0.753828	53.2851	5.43102e-206	1.30834e-204	461.154
POU5F1P4	1.55929	0.620279	53.2605	6.59019e-206	1.58508e-204	460.961
CERS6	2.48113	2.03232	53.2495	7.18586e-206	1.72563e-204	460.874
ANKRD10-IT1	3.58448	2.81442	53.2449	7.45012e-206	1.78627e-204	460.838
RNU6-90P	2.27589	0.704582	53.2426	7.58039e-206	1.81465e-204	460.821
SUV39H2	1.91154	1.29414	53.2414	7.65513e-206	1.82967e-204	460.811
KCMF1	-1.82684	3.83361	-53.2013	1.04838e-205	2.50183e-204	460.496
SLC25A5	2.44227	6.41523	53.196	1.09312e-205	2.60454e-204	460.454
STXBP2	-4.35366	6.92054	-53.1742	1.29797e-205	3.08778e-204	460.283
RPS15AP10	2.80876	1.22606	53.1535	1.52716e-205	3.62736e-204	460.12
CHCHD5	-2.35697	2.70289	-53.1389	1.71195e-205	4.05995e-204	460.006
ALDH2	-3.81458	3.76009	-53.1207	1.97623e-205	4.67943e-204	459.862
HSPA8P15	1.49912	0.592583	53.1025	2.27896e-205	5.38789e-204	459.719
EMC6	-2.58391	2.66953	-53.0848	2.61976e-205	6.18402e-204	459.58
MX2	-4.026	4.52636	-52.9828	5.84455e-205	1.37749e-203	458.777
ARHGEF18-AS1	4.4457	1.71442	52.9448	7.88932e-205	1.85655e-203	458.477
ZBTB40-IT1	1.88564	0.646099	52.9418	8.07772e-205	1.89795e-203	458.453
LINC00937	-3.93613	2.84778	-52.9353	8.50304e-205	1.99481e-203	458.402
COMMD4	-2.39074	3.10273	-52.9317	8.74325e-205	2.04802e-203	458.374
AKAP11	2.43513	1.79532	52.9212	9.4971e-205	2.22119e-203	458.291
NADSYN1	-2.19846	4.8085	-52.9194	9.63583e-205	2.25018e-203	458.277
WASH2P	-2.18534	2.79609	-52.8773	1.3422e-204	3.12955e-203	457.945
ARHGEF6	2.81599	4.29226	52.844	1.74673e-204	4.06654e-203	457.681
RPL5P4	1.74619	0.86163	52.8289	1.96717e-204	4.57276e-203	457.563
RNY4P6	3.46455	1.07238	52.8269	1.99784e-204	4.637e-203	457.547
TMEM191A	-2.02148	1.57895	-52.7931	2.60998e-204	6.04857e-203	457.28
CCNJL	-4.18932	3.00538	-52.7584	3.43146e-204	7.94026e-203	457.006
RIMKLBP2	2.60442	1.02675	52.7173	4.74795e-204	1.09699e-202	456.681
TRIM3	-1.81431	1.96182	-52.7136	4.89072e-204	1.12827e-202	456.651
EEF2K	2.21775	1.83702	52.7047	5.24762e-204	1.20878e-202	456.581
DHX9	1.97993	4.90433	52.6972	5.56573e-204	1.28012e-202	456.522
TBP	1.46625	2.47792	52.6779	6.48586e-204	1.4895e-202	456.369
KIAA0100	2.3662	4.34355	52.6747	6.64912e-204	1.5247e-202	456.344
RNU6-476P	2.8342	0.877335	52.6713	6.83363e-204	1.56466e-202	456.316
ZMYM3	2.75709	2.53989	52.6678	7.02148e-204	1.60526e-202	456.289
MRPL38	-2.6844	3.24063	-52.6637	7.25157e-204	1.65538e-202	456.257
RNU6-1165P	2.67084	0.826789	52.6399	8.76046e-204	1.99683e-202	456.068
BOLA2	-2.11091	1.45774	-52.614	1.0749e-203	2.44644e-202	455.863
MRPL23	-2.75256	3.76288	-52.5968	1.2313e-203	2.79822e-202	455.727
RNU6-288P	2.15001	0.665631	52.5908	1.29131e-203	2.93024e-202	455.68
NME2	-3.25248	4.74066	-52.5872	1.32838e-203	3.00988e-202	455.651
HSD17B7	-1.74996	2.05715	-52.5725	1.49265e-203	3.37707e-202	455.535
FARSB	2.06951	2.44193	52.5614	1.63004e-203	3.68245e-202	455.447
RNU6-88P	2.68161	0.830122	52.5065	2.51859e-203	5.68136e-202	455.011
DNM1L	2.11183	3.18189	52.4888	2.89737e-203	6.52614e-202	454.871
VAMP8	2.7891	6.2643	52.4491	3.9699e-203	8.92877e-202	454.556
RNU6-387P	2.81246	0.87061	52.4402	4.25858e-203	9.56392e-202	454.486
RNU6-1141P	2.91022	0.900859	52.431	4.58131e-203	1.02736e-201	454.413
RFWD3	1.90653	2.37777	52.4062	5.57918e-203	1.24929e-201	454.215
DDOST	2.28519	5.79109	52.4043	5.6647e-203	1.26658e-201	454.2
STARD3	-1.82927	4.56538	-52.3866	6.51885e-203	1.45543e-201	454.06
EEF1A1P19	2.31475	1.05583	52.3524	8.55082e-203	1.90631e-201	453.788
CSNK2A1	1.60149	3.56415	52.3385	9.54861e-203	2.12565e-201	453.678
RNU6-638P	3.1963	0.98938	52.3228	1.0817e-202	2.4045e-201	453.553
SETP5	2.37941	1.05217	52.3006	1.29018e-202	2.86375e-201	453.376
GPATCH8	1.81609	2.65633	52.2745	1.58853e-202	3.52086e-201	453.168
SNORA11F	2.58708	0.865971	52.2578	1.81299e-202	4.01252e-201	453.036
RNU6-652P	1.98136	0.613446	52.2242	2.36858e-202	5.23457e-201	452.769
DARS1	2.58835	3.69384	52.1903	3.10266e-202	6.84695e-201	452.498
FOSB	6.40682	3.5259	52.187	3.18615e-202	7.02104e-201	452.472
TBPL1	-2.1273	2.90546	-52.1855	3.22469e-202	7.09571e-201	452.46
GTF2IP23	2.63791	0.897066	52.1789	3.39807e-202	7.46645e-201	452.407
PCNA	3.58066	4.66747	52.1609	3.92116e-202	8.60342e-201	452.264
ZFP91	1.62278	3.3362	52.1546	4.12287e-202	9.033e-201	452.214
RNU6-198P	2.54037	0.786419	52.1471	4.37544e-202	9.57261e-201	452.154
STT3B	3.03339	4.71744	52.0829	7.29591e-202	1.59392e-200	451.643
TRMT2B	1.2859	2.34277	52.0797	7.48726e-202	1.63338e-200	451.617
BIN3	-2.40408	3.74202	-52.0649	8.42495e-202	1.83532e-200	451.499
MATR3	-1.76714	2.10252	-52.0496	9.5147e-202	2.06975e-200	451.377
ITIH4	-2.90178	2.33857	-52.0143	1.26115e-201	2.73949e-200	451.095
ENOPH1	2.06202	2.60715	51.9918	1.50955e-201	3.27441e-200	450.915
NBPF9	-1.60395	1.51093	-51.9866	1.57363e-201	3.40857e-200	450.874
RNU6-1223P	2.05973	0.637694	51.965	1.86887e-201	4.04233e-200	450.702
CCDC107	-3.10899	2.63228	-51.9418	2.24981e-201	4.8594e-200	450.516
TMEM245	1.86726	2.07182	51.9225	2.62394e-201	5.65947e-200	450.362
GTF3C4	1.27726	1.10748	51.8957	3.25107e-201	7.00219e-200	450.148
ERCC5	-1.73901	3.25988	-51.8832	3.59268e-201	7.72706e-200	450.048
MIR320B2	1.70087	0.533287	51.8445	4.89656e-201	1.05166e-199	449.738
ATAD2	2.90899	1.96436	51.8265	5.65196e-201	1.21219e-199	449.594
BOLA2-SMG1P6	-2.09249	1.94104	-51.8143	6.23041e-201	1.33438e-199	449.497
COX6CP1	2.62373	0.906857	51.7921	7.44244e-201	1.59172e-199	449.319
ZDHHC18	-3.47075	4.96262	-51.7798	8.2155e-201	1.7546e-199	449.22
SDF2	-2.28663	4.15861	-51.7506	1.03724e-200	2.21215e-199	448.987
RPL26P6	2.21215	0.959712	51.7215	1.30996e-200	2.78988e-199	448.753
TAX1BP3	-2.48453	3.08252	-51.6753	1.89708e-200	4.03467e-199	448.382
HMGN2P5	-3.11986	3.99148	-51.673	1.93225e-200	4.10374e-199	448.364
APOOL	1.28291	1.15865	51.6307	2.71259e-200	5.75303e-199	448.025
SNRPGP18	3.54948	1.17429	51.63	2.72764e-200	5.77691e-199	448.019
RNY1P13	3.07022	0.950366	51.6173	3.01867e-200	6.38442e-199	447.918
HAGH	-3.89855	4.12435	-51.6167	3.03288e-200	6.4056e-199	447.913
CCDC12	-1.90393	3.50596	-51.6014	3.43081e-200	7.23602e-199	447.79
POFUT1	1.63821	2.03139	51.5979	3.52647e-200	7.4275e-199	447.762
RNF215	-1.3448	1.41823	-51.5929	3.67126e-200	7.72179e-199	447.722
OIP5-AS1	2.1549	3.46588	51.5789	4.10876e-200	8.6301e-199	447.609
QSER1	2.03937	1.35939	51.5632	4.66008e-200	9.77464e-199	447.483
NOL9	1.63187	1.88514	51.5569	4.9004e-200	1.02646e-198	447.433
RNU7-181P	4.12866	1.27788	51.5372	5.74289e-200	1.20128e-198	447.274
MCM3	3.1431	3.70492	51.4846	8.76242e-200	1.83039e-198	446.851
RRP1B	2.23303	2.33389	51.4824	8.91943e-200	1.86064e-198	446.834
MIR548O	2.52276	0.78097	51.4384	1.26983e-199	2.64531e-198	446.48
SMAP1	-1.47029	2.49833	-51.4278	1.38248e-199	2.87606e-198	446.395
DHDDS-AS1	2.31233	0.97392	51.4212	1.45863e-199	3.03034e-198	446.341
EP300-AS1	2.55732	1.11586	51.4201	1.47074e-199	3.05134e-198	446.333
IL32	-5.36451	4.84875	-51.4192	1.48154e-199	3.06957e-198	446.326
ZNF460	2.921	1.57116	51.3918	1.84735e-199	3.82229e-198	446.105
PPIAP42	2.26937	0.778365	51.3806	2.02162e-199	4.17718e-198	446.015
EIF4EBP2	1.8637	4.42081	51.3173	3.36418e-199	6.94186e-198	445.505
DIMT1	2.06192	2.50801	51.2854	4.34937e-199	8.96263e-198	445.248
RNU6-10P	4.0219	1.24484	51.2819	4.473e-199	9.20497e-198	445.22
DHX33	1.75713	1.49636	51.2563	5.50033e-199	1.13038e-197	445.013
RN7SKP163	2.4962	0.854142	51.2423	6.15632e-199	1.2635e-197	444.9
ANAPC15	-2.8611	3.24388	-51.2226	7.21435e-199	1.47865e-197	444.742
ESS2	-1.86491	2.52044	-51.138	1.42768e-198	2.92225e-197	444.059
PPP1R12C	-2.35245	4.72087	-51.1341	1.47325e-198	3.01148e-197	444.027
PHIP	2.88628	2.79639	51.1304	1.51788e-198	3.09854e-197	443.997
TXNL4A	-1.89943	3.96018	-51.0974	1.98181e-198	4.04019e-197	443.731
OSTCP8	1.66595	0.551214	51.0645	2.5857e-198	5.26427e-197	443.464
RNVU1-33	2.16744	0.690138	51.0612	2.65551e-198	5.39918e-197	443.438
KRR1P1	2.34247	0.981891	51.0607	2.66522e-198	5.41171e-197	443.434
MTR	2.14526	1.6691	51.0464	2.99234e-198	6.06785e-197	443.318
SLC35B1	-1.65198	3.49285	-51.028	3.47198e-198	7.03111e-197	443.169
ASH1L	2.66949	2.87401	51.0174	3.78343e-198	7.65165e-197	443.083
AKTIP	-2.39181	2.48343	-50.9944	4.55693e-198	9.20379e-197	442.897
TSEN34	-3.6652	4.60717	-50.9494	6.55677e-198	1.32254e-196	442.533
RPL18P10	3.12209	1.32529	50.8893	1.06634e-197	2.14804e-196	442.047
TXLNG	1.71963	1.89475	50.8612	1.33929e-197	2.69431e-196	441.819
H2AJ	-3.64364	3.92309	-50.8571	1.38453e-197	2.78166e-196	441.785
RNU6-606P	2.11555	0.654969	50.8491	1.47636e-197	2.96224e-196	441.721
DARS2	1.95746	1.95526	50.837	1.6289e-197	3.264e-196	441.623
CROCCP2	2.42134	1.75127	50.8327	1.68681e-197	3.37561e-196	441.588
RNU6-878P	4.63142	1.44732	50.8173	1.91145e-197	3.82015e-196	441.463
POLG2	2.07992	2.84423	50.7997	2.20491e-197	4.40087e-196	441.32
PCBP2	-1.81643	7.11479	-50.7985	2.22498e-197	4.43512e-196	441.311
FAM120A	2.01925	4.43968	50.7853	2.477e-197	4.93105e-196	441.203
INTS2	1.52024	1.19249	50.7566	3.12589e-197	6.21469e-196	440.97
KIF5B	2.75355	3.6208	50.751	3.2726e-197	6.49789e-196	440.924
PANK4	-1.9176	2.88158	-50.7361	3.69353e-197	7.32414e-196	440.803
ZDHHC21	1.76167	1.06915	50.7038	4.7976e-197	9.50112e-196	440.542
CCNI	2.27113	7.01814	50.6802	5.81485e-197	1.15007e-195	440.349
RN7SL182P	2.63919	0.841599	50.6658	6.53573e-197	1.29098e-195	440.232
UGGT1	1.96524	3.09699	50.6586	6.92895e-197	1.36688e-195	440.174
RNA5SP465	2.52911	0.782935	50.6359	8.32906e-197	1.64095e-195	439.99
ZMAT5	-2.64235	2.99542	-50.6308	8.68504e-197	1.70888e-195	439.948
MTCO1P40	4.45621	1.5377	50.5748	1.36885e-196	2.6899e-195	439.493
GUF1	1.764	2.29309	50.5262	2.03235e-196	3.98859e-195	439.097
ARMC1	2.11731	2.07572	50.5192	2.15215e-196	4.21827e-195	439.04
EIF2B1	1.43743	3.36402	50.5167	2.19677e-196	4.3002e-195	439.019
CIDECP1	-2.03753	2.61369	-50.4824	2.90362e-196	5.67658e-195	438.74
SNRNP35	-2.29714	3.00541	-50.4702	3.20768e-196	6.26299e-195	438.64
MRPL52	-2.45087	3.79645	-50.4686	3.2492e-196	6.33595e-195	438.627
ALDH18A1	2.8425	2.63077	50.4683	3.25846e-196	6.34589e-195	438.625
DDX50	1.86019	3.08887	50.4625	3.4141e-196	6.64051e-195	438.578
NGRN	-1.64299	2.38372	-50.4573	3.5632e-196	6.92169e-195	438.535
MIR4748	2.26955	0.70262	50.4518	3.72697e-196	7.2306e-195	438.49
S100P	-6.14131	5.65601	-50.4407	4.07975e-196	7.90496e-195	438.4
EPM2AIP1	2.24041	2.33913	50.4321	4.37437e-196	8.46508e-195	438.33
SYPL1	2.61743	4.01107	50.375	6.96626e-196	1.34637e-194	437.864
PAN3	2.88625	3.76829	50.3524	8.37623e-196	1.61682e-194	437.68
ANKRD44-IT1	3.0364	1.13054	50.3273	1.02828e-195	1.98233e-194	437.475
MRPL45	2.19365	3.17571	50.3203	1.08811e-195	2.09502e-194	437.418
MKRN2	1.51229	2.89714	50.3163	1.12479e-195	2.16291e-194	437.385
INO80D	2.01224	1.7727	50.2913	1.37912e-195	2.64865e-194	437.181
FAM157B	-3.68317	2.66649	-50.2882	1.41516e-195	2.71444e-194	437.155
EMC4	-1.43546	3.80469	-50.2824	1.48269e-195	2.8404e-194	437.108
H3P25	1.74312	0.657066	50.2817	1.49125e-195	2.85321e-194	437.103
ZC3H15	2.236	3.59972	50.2549	1.85593e-195	3.54651e-194	436.884
ANKHD1-EIF4EBP3	-2.23444	2.40764	-50.2197	2.47525e-195	4.72403e-194	436.596
ANAPC11	-2.60972	3.91727	-50.2035	2.82512e-195	5.38502e-194	436.463
RPL31P58	1.58867	0.520829	50.1989	2.93508e-195	5.58764e-194	436.425
METTL22	-1.71578	3.10547	-50.1723	3.64537e-195	6.9312e-194	436.208
RPS6KB2	-2.04811	4.18995	-50.1427	4.64736e-195	8.82536e-194	435.965
N4BP2	2.29247	1.28489	50.1288	5.20511e-195	9.87224e-194	435.852
PM20D2	3.36685	2.03692	50.1108	6.03251e-195	1.14166e-193	435.704
CTRL	-2.24299	1.70258	-50.1107	6.03435e-195	1.14166e-193	435.704
DCAF1	1.72898	2.26208	50.108	6.17258e-195	1.16636e-193	435.681
TMEM183A	-1.47806	4.04918	-50.1055	6.30054e-195	1.18907e-193	435.661
GLUD1P3	1.69776	1.09407	50.0872	7.31612e-195	1.37903e-193	435.511
ARPP19	2.02104	3.76548	50.0709	8.36111e-195	1.57406e-193	435.378
SUGP1	-1.62873	3.44384	-50.0373	1.1006e-194	2.06942e-193	435.102
MIR4477B	4.34599	1.34512	50.0218	1.25023e-194	2.34788e-193	434.975
SNORD121A	1.93138	0.597982	50.0082	1.39679e-194	2.61989e-193	434.864
MIR5581	2.51846	0.779637	49.9858	1.6795e-194	3.14628e-193	434.68
ATG101	-2.06205	2.71188	-49.9444	2.3579e-194	4.41174e-193	434.34
NSUN5P2	-2.30569	2.09335	-49.9441	2.36354e-194	4.41687e-193	434.338
RNY1P16	3.43939	1.11593	49.9231	2.80799e-194	5.24101e-193	434.165
MMP25	-6.4034	5.75832	-49.9172	2.94586e-194	5.49161e-193	434.117
EEF1A1P25	2.76252	0.988237	49.9124	3.06447e-194	5.70575e-193	434.078
NADK2-AS1	1.7874	0.624229	49.8967	3.4863e-194	6.48325e-193	433.949
PSMD10P1	2.53247	1.18869	49.8703	4.32974e-194	8.04192e-193	433.732
PMS2P6	-1.71438	1.35866	-49.8622	4.62814e-194	8.5857e-193	433.665
TBC1D7	-2.28491	2.5841	-49.849	5.16032e-194	9.56132e-193	433.556
SAP25	-3.82233	3.53972	-49.844	5.37574e-194	9.94838e-193	433.515
STRAP	1.85643	4.33455	49.8104	7.0833e-194	1.30925e-192	433.239
MIR4766	1.9436	0.601762	49.792	8.23721e-194	1.52069e-192	433.088
ALG1L6P	1.77814	0.556146	49.7915	8.27576e-194	1.52596e-192	433.084
EML2	-2.0589	3.14309	-49.7733	9.60545e-194	1.769e-192	432.934
VMA21	2.42533	2.87605	49.7659	1.02117e-193	1.87839e-192	432.873
ZNF70	2.30935	1.09745	49.7479	1.18443e-193	2.17608e-192	432.725
SPCS2	-1.87195	4.27166	-49.743	1.23233e-193	2.26135e-192	432.685
MRPL53P1	2.98121	1.35253	49.7415	1.24814e-193	2.28761e-192	432.672
TRPM7	2.03577	2.21135	49.7271	1.40429e-193	2.57071e-192	432.554
TFEB	-3.75316	4.07725	-49.72	1.48928e-193	2.72302e-192	432.496
RNU6-100P	2.1053	0.651796	49.6823	2.03184e-193	3.7106e-192	432.185
SEPTIN7P12	2.28217	0.817941	49.6752	2.15288e-193	3.92694e-192	432.127
CUL5	1.81927	1.84714	49.6605	2.43065e-193	4.42832e-192	432.005
ERMP1	2.77123	2.09953	49.6533	2.57811e-193	4.69136e-192	431.946
BIRC6-AS2	1.7756	0.666057	49.6458	2.74255e-193	4.98463e-192	431.885
GTDC1	-2.53873	2.54989	-49.6196	3.40516e-193	6.18158e-192	431.668
ARMCX6	-1.85281	2.89546	-49.5899	4.34709e-193	7.88214e-192	431.424
ZMYND8	2.70016	2.71881	49.5783	4.78339e-193	8.66293e-192	431.328
PTRH1	-1.92898	1.37126	-49.5738	4.96535e-193	8.9818e-192	431.291
ABCE1	2.40345	2.49658	49.5647	5.35119e-193	9.66829e-192	431.216
CASP8AP2	2.01288	1.4996	49.5012	9.03424e-193	1.63033e-191	430.692
ATF6B	1.57692	5.36325	49.4589	1.2812e-192	2.30934e-191	430.342
OAZ1	-3.02519	9.53649	-49.4509	1.36878e-192	2.46429e-191	430.276
PGLYRP1	-5.50142	4.99746	-49.4315	1.60625e-192	2.88841e-191	430.116
SMC1A	2.27924	3.11956	49.4098	1.92128e-192	3.45083e-191	429.937
UBR7	1.72087	2.64983	49.3566	2.98245e-192	5.35052e-191	429.497
CNOT6	1.95569	2.31837	49.3525	3.08503e-192	5.52805e-191	429.463
DYRK4	-2.16248	2.25875	-49.3444	3.29983e-192	5.90599e-191	429.395
PLEKHG3	-3.06921	3.02969	-49.339	3.45039e-192	6.16824e-191	429.351
SRP9	3.08639	4.82188	49.3306	3.69896e-192	6.60484e-191	429.281
MIB1	2.53927	1.90775	49.328	3.77906e-192	6.73998e-191	429.26
TMEM35B	-2.1577	2.82288	-49.3213	3.99396e-192	7.11494e-191	429.204
STK16	-2.50586	3.61963	-49.3188	4.07807e-192	7.25631e-191	429.183
CXCR2	-5.77822	5.05194	-49.3121	4.30807e-192	7.65661e-191	429.129
MRTFA-AS1	1.38031	0.562669	49.3003	4.74924e-192	8.43086e-191	429.031
SSR2	-1.84329	6.04111	-49.2957	4.93671e-192	8.75347e-191	428.992
PPP4R1L	-2.4787	2.35913	-49.2896	5.18929e-192	9.19065e-191	428.942
LIMK2	-2.99209	5.20544	-49.2833	5.46769e-192	9.67248e-191	428.89
SIRT2	-2.04846	4.21482	-49.2799	5.62244e-192	9.93471e-191	428.862
POLDIP3	1.48338	4.46639	49.2757	5.82587e-192	1.02823e-190	428.826
NCF1	-5.66884	5.87413	-49.2657	6.3253e-192	1.11508e-190	428.744
ZNF7	-1.43057	2.34537	-49.2624	6.49933e-192	1.14444e-190	428.717
IL18RAP	-5.33139	4.49397	-49.2592	6.67622e-192	1.17423e-190	428.69
RNU6-1297P	2.18121	0.675283	49.2513	7.12574e-192	1.25185e-190	428.625
PSENEN	-2.99171	4.4829	-49.2511	7.14127e-192	1.25313e-190	428.623
DBNL	-2.32636	5.62312	-49.2317	8.38252e-192	1.46925e-190	428.462
DKC1	2.11594	3.41189	49.2036	1.05839e-191	1.85297e-190	428.229
PDLIM7	-3.57096	5.58348	-49.1969	1.11864e-191	1.9562e-190	428.174
GARS1-DT	-2.32011	4.06475	-49.1611	1.50469e-191	2.62829e-190	427.877
GTF2IRD2	-1.94809	1.65006	-49.1423	1.75847e-191	3.06806e-190	427.721
SERF1B	-1.82096	1.36092	-49.1407	1.78177e-191	3.10517e-190	427.708
SLCO3A1	-2.66768	3.99492	-49.1367	1.84144e-191	3.20549e-190	427.675
GTF2H4	-1.70202	1.8859	-49.1045	2.40597e-191	4.18342e-190	427.407
TRBC1	-5.27999	4.14282	-49.0975	2.54875e-191	4.42664e-190	427.35
SETD1A	1.95429	2.26299	49.0928	2.65035e-191	4.59786e-190	427.31
MT-TT	5.23226	1.61936	49.0912	2.6868e-191	4.65579e-190	427.297
SNORD104	4.1038	1.27018	49.08	2.94692e-191	5.10075e-190	427.204
ALPL	-6.87056	5.25543	-49.0531	3.68484e-191	6.37076e-190	426.981
CHML	2.31346	1.23363	49.0448	3.94882e-191	6.81943e-190	426.911
HEATR1	1.94194	1.81414	49.0382	4.17186e-191	7.19646e-190	426.856
PSMA2	-2.76438	3.19666	-49.0346	4.29732e-191	7.40449e-190	426.827
PPP2R5C	-2.38825	4.60518	-49.0143	5.08554e-191	8.75276e-190	426.658
SNORD70	2.72229	0.842707	49.0071	5.39903e-191	9.28183e-190	426.598
SLC43A2	-3.96796	4.40771	-48.989	6.27364e-191	1.07733e-189	426.448
GUK1	-4.41646	6.81559	-48.9818	6.66468e-191	1.14319e-189	426.388
INO80C	-1.78759	2.36714	-48.9774	6.91308e-191	1.18447e-189	426.351
NOA1	1.72598	2.6566	48.961	7.91793e-191	1.35511e-189	426.215
RC3H1-IT1	2.2653	0.788073	48.9474	8.87032e-191	1.51641e-189	426.102
MIR221	4.31881	1.37777	48.9388	9.52906e-191	1.6272e-189	426.03
GPR75	1.56216	0.79132	48.8972	1.34632e-190	2.29642e-189	425.684
HSPE1P13	2.1953	0.733451	48.892	1.40545e-190	2.39461e-189	425.641
BICRA-AS1	1.67544	0.560349	48.8785	1.57346e-190	2.67786e-189	425.528
SLBP	1.77264	4.24944	48.8754	1.61432e-190	2.74434e-189	425.502
INTS7	1.86717	2.16792	48.8656	1.75183e-190	2.97479e-189	425.421
HBB	-7.98992	14.2964	-48.8509	1.97922e-190	3.3572e-189	425.298
REST	2.5176	2.36166	48.8417	2.13626e-190	3.61954e-189	425.222
ARHGEF18	-2.03302	2.81883	-48.8371	2.21986e-190	3.75701e-189	425.184
OGT	3.23829	5.56702	48.834	2.27729e-190	3.84994e-189	425.158
MSH2	2.36127	1.99825	48.8319	2.31883e-190	3.91581e-189	425.14
HIGD1AP17	1.90459	0.617944	48.8219	2.51934e-190	4.24971e-189	425.057
CHMP2A	-2.39151	6.02997	-48.8203	2.55261e-190	4.30108e-189	425.044
AP3S2	-2.40669	2.98907	-48.8196	2.56805e-190	4.32232e-189	425.038
RNU6-1280P	3.18034	0.98444	48.8055	2.88707e-190	4.8539e-189	424.921
TFB2M	2.26295	1.83674	48.7817	3.52145e-190	5.91394e-189	424.722
CHD9	2.28357	2.04914	48.7791	3.59986e-190	6.03898e-189	424.7
RNU6-795P	2.09137	0.647486	48.7647	4.05712e-190	6.79857e-189	424.58
NAMPT	-5.95585	7.03381	-48.7619	4.1529e-190	6.95143e-189	424.557
H2AZP1	2.14084	0.715126	48.7211	5.83672e-190	9.75923e-189	424.216
EEF1A1P9	2.2318	0.996498	48.6938	7.32599e-190	1.22359e-188	423.989
SRXN1	-3.84953	2.86174	-48.6793	8.26821e-190	1.37945e-188	423.868
IPO4	-1.56768	1.73346	-48.6696	8.96846e-190	1.49465e-188	423.786
ABTB1	-4.30099	6.34441	-48.6601	9.70878e-190	1.61626e-188	423.707
NDUFA3P2	2.33452	0.80012	48.6472	1.0809e-189	1.79745e-188	423.6
SKP2	1.95164	1.9712	48.641	1.13824e-189	1.89074e-188	423.548
SCNM1	-2.31455	4.33633	-48.6206	1.35036e-189	2.24065e-188	423.377
SLC11A1	-6.64013	6.80395	-48.6018	1.57969e-189	2.61833e-188	423.22
AGPAT5	2.76796	1.95302	48.5836	1.83838e-189	3.0438e-188	423.068
CHROMR	2.47713	1.97267	48.5578	2.28023e-189	3.77128e-188	422.853
MIR3685	2.40709	0.745176	48.5479	2.47746e-189	4.09305e-188	422.77
SMC5	2.3118	2.5794	48.5471	2.49384e-189	4.11565e-188	422.763
LRPPRC	2.33832	2.85203	48.5435	2.56991e-189	4.2366e-188	422.733
NAA60	-2.33892	3.78093	-48.5172	3.20231e-189	5.27344e-188	422.513
LILRA6	-5.26737	4.90813	-48.5056	3.52885e-189	5.80489e-188	422.416
TEC	3.29168	2.14914	48.4991	3.72565e-189	6.12204e-188	422.361
PRPF6	1.85538	4.36838	48.4963	3.81346e-189	6.25958e-188	422.338
ORMDL2	-2.57515	3.51044	-48.4646	4.9734e-189	8.15477e-188	422.072
TIMM23B-AGAP6	1.62186	0.708387	48.4583	5.24167e-189	8.58541e-188	422.02
ANKMY2	1.84916	1.96738	48.4269	6.81724e-189	1.11541e-187	421.757
NANOGP5	1.77271	0.579598	48.4135	7.62426e-189	1.24611e-187	421.645
ZNF22	2.42103	2.45727	48.4035	8.29453e-189	1.35421e-187	421.56
YY1	1.64429	3.73807	48.3793	1.01547e-188	1.65613e-187	421.358
CYSTM1	-5.32046	5.1182	-48.3733	1.06795e-188	1.73988e-187	421.307
PRRC2C	2.40971	4.39188	48.3662	1.13312e-188	1.84406e-187	421.248
CAAP1	1.77017	1.7075	48.3637	1.15713e-188	1.88114e-187	421.227
TSN	1.9439	3.06986	48.3414	1.3949e-188	2.26526e-187	421.04
TNKS2	2.0381	3.14912	48.3399	1.41297e-188	2.29216e-187	421.027
WDR5B-DT	-2.54268	2.62434	-48.3342	1.48192e-188	2.40146e-187	420.98
MIR579	1.85565	0.574546	48.3173	1.70763e-188	2.7643e-187	420.838
ASH1L-IT1	1.62826	0.531909	48.3154	1.73477e-188	2.80525e-187	420.822
ICAM3	-4.39137	5.97961	-48.3107	1.80462e-188	2.9151e-187	420.782
TMX2	1.66107	4.08138	48.3028	1.92825e-188	3.11152e-187	420.716
RNU2-68P	1.9433	0.601669	48.2802	2.33148e-188	3.75822e-187	420.526
PITPNC1	-2.69309	3.33081	-48.277	2.39451e-188	3.85575e-187	420.499
SUPT16H	1.81762	3.80914	48.276	2.41377e-188	3.88266e-187	420.491
TNFRSF14-AS1	-2.3784	2.07052	-48.2642	2.66504e-188	4.28232e-187	420.392
RNU6ATAC16P	1.86775	0.57829	48.2619	2.7167e-188	4.36074e-187	420.373
CSDE1	2.13036	6.19292	48.2496	3.01213e-188	4.82986e-187	420.27
IPPK	-1.21523	1.47809	-48.2368	3.35415e-188	5.37263e-187	420.162
STK26	3.27201	3.62397	48.2291	3.57826e-188	5.7256e-187	420.097
WDR5	1.51067	2.76436	48.2075	4.29087e-188	6.85865e-187	419.916
RTEL1	-1.79113	1.5692	-48.2048	4.38831e-188	7.00704e-187	419.893
PPIAP72	3.25289	1.11239	48.1992	4.60109e-188	7.33912e-187	419.846
SMARCE1	-1.59921	3.50826	-48.1545	6.69462e-188	1.06673e-186	419.471
VKORC1	-2.37326	3.83901	-48.1542	6.71419e-188	1.06873e-186	419.468
ABCB7	1.6999	2.75688	48.1317	8.1093e-188	1.28946e-186	419.279
NIT1	-1.74468	3.58196	-48.1264	8.48176e-188	1.34727e-186	419.234
MRPL3	2.47392	3.39884	48.1183	9.08182e-188	1.44109e-186	419.165
MRPS10	1.59635	2.98518	48.1172	9.16005e-188	1.45199e-186	419.157
HMGB1P14	2.08238	0.889065	48.1049	1.01634e-187	1.60937e-186	419.053
APBA3	-2.07035	2.79954	-48.0932	1.12068e-187	1.77275e-186	418.955
TIMM9P2	1.7957	0.563301	48.0866	1.18479e-187	1.87221e-186	418.899
ZNF618	2.01428	0.986393	48.0743	1.31387e-187	2.07404e-186	418.796
HIGD1AP16	2.14907	0.770989	48.0693	1.37102e-187	2.16201e-186	418.753
EIF2S2	1.81412	4.13636	48.0682	1.38359e-187	2.17959e-186	418.744
ZNRD2	-2.33467	3.45316	-48.061	1.46973e-187	2.31289e-186	418.684
N4BP2L2-IT2	1.83472	1.59529	48.0579	1.50835e-187	2.37122e-186	418.658
ETV6	2.86683	4.53049	48.0555	1.53945e-187	2.41762e-186	418.637
NSA2P7	2.01689	0.701712	48.051	1.59865e-187	2.508e-186	418.599
SMIM29	-2.1507	3.09174	-48.0242	2.00345e-187	3.13983e-186	418.374
COX20	-1.57434	2.11316	-48.0187	2.09803e-187	3.28468e-186	418.327
FBXW8	1.50594	1.49935	48.0104	2.25114e-187	3.52079e-186	418.257
ABCC1	3.1775	3.27434	47.9949	2.56296e-187	4.00436e-186	418.127
C5AR2	-3.7207	3.12638	-47.9936	2.59259e-187	4.04652e-186	418.116
NUP43	1.71077	2.35514	47.9912	2.64482e-187	4.12381e-186	418.096
RNU4-39P	1.96314	0.615906	47.9886	2.70434e-187	4.21231e-186	418.073
PIGM	1.83329	1.45085	47.9809	2.88387e-187	4.48735e-186	418.009
BAG5	1.41047	2.29044	47.9764	2.99517e-187	4.6558e-186	417.971
AQP9	-6.04688	5.5854	-47.9674	3.23222e-187	5.01915e-186	417.895
LRRC40	1.94549	1.67998	47.9568	3.53471e-187	5.4833e-186	417.805
TUBB	3.54328	6.57674	47.9297	4.44192e-187	6.88361e-186	417.577
CBX7	-2.40147	2.97344	-47.9249	4.6223e-187	7.15588e-186	417.537
PCED1B-AS1	-3.86484	4.34406	-47.915	5.02847e-187	7.77679e-186	417.453
FKBP1AP1	1.93249	0.660528	47.9104	5.22537e-187	8.07312e-186	417.414
MIR1296	2.51948	0.779955	47.8948	5.95913e-187	9.19744e-186	417.283
EIF5B	2.50863	3.28397	47.8796	6.77367e-187	1.04441e-185	417.155
ATOX1	-2.24166	3.84422	-47.8674	7.50765e-187	1.1564e-185	417.052
DCAF16	2.47758	2.49629	47.8664	7.57421e-187	1.16548e-185	417.043
MTCO1P53	2.62226	0.816125	47.8636	7.75635e-187	1.1923e-185	417.019
LIME1	-3.70599	3.53903	-47.8592	8.0458e-187	1.23555e-185	416.982
INO80E	-2.01365	3.60171	-47.8114	1.20476e-186	1.84823e-185	416.578
SCAF4	1.83098	3.31871	47.7957	1.3756e-186	2.10819e-185	416.446
NAA25	1.60064	1.60363	47.7914	1.42651e-186	2.18401e-185	416.409
USP22	2.0424	4.2798	47.7778	1.60017e-186	2.44745e-185	416.294
LIMS1-AS1	1.79785	0.63505	47.7554	1.93303e-186	2.95359e-185	416.105
MIR5692A1	3.28845	1.01789	47.75	2.02369e-186	3.08902e-185	416.059
ZNHIT1	-2.24334	3.79811	-47.7494	2.03349e-186	3.10086e-185	416.054
MIR548AR	2.45401	0.759694	47.7317	2.36169e-186	3.59774e-185	415.905
MED11	-2.12425	3.29995	-47.7238	2.52426e-186	3.84156e-185	415.838
FLT3	5.41224	3.48364	47.705	2.95853e-186	4.49797e-185	415.679
INO80	1.48818	2.59002	47.7006	3.07232e-186	4.66631e-185	415.641
RNU6-711P	2.53438	0.784563	47.6947	3.22883e-186	4.89915e-185	415.592
TMEM199	-1.84708	2.35481	-47.6761	3.77956e-186	5.72907e-185	415.434
REPS2	-3.33235	3.06333	-47.6669	4.08483e-186	6.18322e-185	415.356
PTPRA	1.42612	3.97567	47.6668	4.08727e-186	6.18322e-185	415.356
KCTD20	1.89439	3.79311	47.6413	5.07186e-186	7.66509e-185	415.14
RGL4	-4.29765	4.40566	-47.5884	7.93804e-186	1.19849e-184	414.692
TRIM44	1.98111	2.43562	47.5856	8.12605e-186	1.22566e-184	414.668
ORM1	-4.84857	3.53891	-47.5729	9.04639e-186	1.36313e-184	414.561
LINC00641	2.29095	2.12715	47.5459	1.1372e-185	1.71187e-184	414.332
MAN1A2	1.72878	1.82919	47.535	1.24811e-185	1.87697e-184	414.239
PSMA6	-3.01408	4.01762	-47.5239	1.37111e-185	2.05991e-184	414.145
MTLN	-2.41431	2.23793	-47.5185	1.43542e-185	2.15441e-184	414.099
CASTOR1	-2.05517	1.70012	-47.5178	1.44364e-185	2.1646e-184	414.093
CYP51A1	-1.58374	1.36904	-47.5087	1.559e-185	2.33528e-184	414.016
E2F3-IT1	2.16952	0.715481	47.5084	1.56317e-185	2.33924e-184	414.013
BPNT2	1.81012	2.42405	47.5008	1.6668e-185	2.49186e-184	413.949
MFSD14C	2.02816	2.44695	47.4931	1.77954e-185	2.6578e-184	413.884
DEDD2	-2.56175	5.20218	-47.4905	1.81914e-185	2.7143e-184	413.862
RNY4P7	2.3639	0.731812	47.4803	1.98301e-185	2.95591e-184	413.775
NUDT15	1.49315	1.44707	47.4708	2.15041e-185	3.20231e-184	413.694
ACBD3	1.83337	2.61391	47.4695	2.17428e-185	3.23469e-184	413.683
PMS2P1	1.94907	2.07926	47.4492	2.58218e-185	3.83778e-184	413.511
LIN7C	1.66618	1.79563	47.4425	2.7337e-185	4.05902e-184	413.454
PSMB9	-3.2037	5.14517	-47.4314	3.00444e-185	4.45668e-184	413.36
MED1	1.82395	2.57571	47.4267	3.12633e-185	4.63298e-184	413.32
POMK	2.3976	1.21348	47.4166	3.40451e-185	5.04032e-184	413.234
LTV1	2.08425	2.61275	47.4139	3.48442e-185	5.15363e-184	413.211
JMJD6	-3.34363	4.38665	-47.4084	3.64945e-185	5.39249e-184	413.165
ZNF629	1.61267	1.22172	47.3911	4.22878e-185	6.24247e-184	413.017
RPL13AP25	2.76433	1.32894	47.3875	4.35892e-185	6.42835e-184	412.987
TGS1	1.79836	2.07232	47.3835	4.5111e-185	6.64635e-184	412.953
PKD2	2.96221	1.9641	47.3816	4.58214e-185	6.7445e-184	412.937
RNU6-645P	2.98552	0.924158	47.348	6.09642e-185	8.96473e-184	412.651
CELF1	1.83274	4.2145	47.3245	7.44526e-185	1.09376e-183	412.451
MIS18BP1	2.8741	3.26922	47.3232	7.52986e-185	1.10513e-183	412.44
MIR5690	4.18933	1.29665	47.3092	8.47634e-185	1.24284e-183	412.322
FCGR2B	-3.13824	2.6812	-47.2928	9.7496e-185	1.42816e-183	412.182
TRPC4AP	1.44265	5.18874	47.2923	9.78707e-185	1.43228e-183	412.178
CSPP1	1.83266	1.46803	47.2857	1.03484e-184	1.51297e-183	412.122
API5	2.02566	3.45643	47.28	1.08697e-184	1.58766e-183	412.073
RNU6-407P	1.80412	0.558604	47.275	1.13372e-184	1.65436e-183	412.031
RPS10-NUDT3	-2.45297	1.71509	-47.273	1.1531e-184	1.68104e-183	412.014
RN7SL481P	3.14092	1.3143	47.2685	1.19803e-184	1.74487e-183	411.975
HCAR3	-5.09447	3.85684	-47.2351	1.59231e-184	2.31691e-183	411.691
SCLY	-1.20296	1.61341	-47.2331	1.61978e-184	2.35463e-183	411.674
RPL21P30	1.87109	0.594118	47.2272	1.70262e-184	2.47269e-183	411.624
MEMO1	-1.97778	3.06605	-47.1335	3.77985e-184	5.48421e-183	410.826
GLUD1	1.98095	4.34644	47.1287	3.9377e-184	5.70779e-183	410.785
SIAH2-AS1	1.95959	0.734253	47.121	4.20614e-184	6.09111e-183	410.719
UTP20	1.38402	1.00017	47.1207	4.21572e-184	6.09919e-183	410.716
RNU6-190P	2.36664	0.732661	47.1177	4.32428e-184	6.25032e-183	410.691
UBE2V2P4	1.96923	0.646082	47.0953	5.2346e-184	7.55894e-183	410.5
PGAM1	-2.87429	5.7658	-47.0952	5.23958e-184	7.55898e-183	410.499
SNORA16B	3.11498	1.09798	47.0891	5.51987e-184	7.95581e-183	410.447
HADHA	1.74731	5.63863	47.0739	6.28154e-184	9.04506e-183	410.317
DHRS13	-3.66241	3.28759	-47.0574	7.23049e-184	1.04017e-182	410.176
ARL2BP	-1.48603	2.50054	-47.0098	1.08551e-183	1.56012e-182	409.77
MTX1	-3.14361	4.10211	-46.9873	1.31556e-183	1.88899e-182	409.577
IBTK	1.77293	1.96441	46.9862	1.32835e-183	1.90555e-182	409.568
EMC3	-2.38064	4.69092	-46.9384	1.9981e-183	2.86363e-182	409.159
MIR548L	2.14019	0.662591	46.9373	2.01704e-183	2.88805e-182	409.15
RBL1	2.07481	1.50897	46.9276	2.18991e-183	3.13264e-182	409.068
EIF2B2	-1.49472	2.96768	-46.9086	2.57658e-183	3.68232e-182	408.905
NUFIP2	2.44836	3.57157	46.9063	2.6276e-183	3.75171e-182	408.885
SOS1	2.27929	2.57481	46.9055	2.64592e-183	3.77433e-182	408.878
RPL7AP10	2.2113	1.03557	46.8806	3.27385e-183	4.66569e-182	408.665
PAGR1	-1.95592	2.50959	-46.8534	4.12941e-183	5.87949e-182	408.433
SNORD13D	2.09085	0.647325	46.8457	4.412e-183	6.27599e-182	408.367
TIMM17B	-2.14491	4.16195	-46.8426	4.5299e-183	6.43769e-182	408.34
PAK2	2.14075	4.4342	46.817	5.64096e-183	8.00922e-182	408.121
ELF1	2.64455	5.00825	46.8138	5.79494e-183	8.22019e-182	408.094
AHCYL1	1.56397	3.6481	46.8096	6.00804e-183	8.51455e-182	408.058
CYCSP10	2.02375	0.77731	46.8074	6.12015e-183	8.66538e-182	408.039
PIK3C2A	1.7544	1.80615	46.7867	7.31174e-183	1.03429e-181	407.861
CREB3L2	2.21939	2.77497	46.7826	7.57281e-183	1.07023e-181	407.826
RNU6-828P	1.80877	0.56004	46.7667	8.67352e-183	1.22465e-181	407.69
ANP32B	2.70826	6.11422	46.7494	1.00588e-182	1.41893e-181	407.542
MIR7854	2.59135	0.802193	46.7464	1.0323e-182	1.45486e-181	407.516
ZNF888	1.89813	0.690751	46.7306	1.18188e-182	1.66412e-181	407.38
SLC22A18	-3.32481	3.30602	-46.7171	1.32691e-182	1.86661e-181	407.265
KDM1A	1.89419	3.49546	46.7146	1.35541e-182	1.90495e-181	407.243
MIR644A	2.38759	0.739143	46.7137	1.3654e-182	1.91722e-181	407.236
PABPN1P1	2.2254	1.0537	46.6848	1.74973e-182	2.45461e-181	406.988
MIR3671	3.38463	1.04766	46.6609	2.14678e-182	3.00885e-181	406.783
MGST3	-2.26914	3.42388	-46.646	2.43993e-182	3.41657e-181	406.655
KLHL11	1.35765	0.738543	46.6393	2.58344e-182	3.6142e-181	406.598
TIMM10B	1.4842	2.8302	46.6226	2.98357e-182	4.17016e-181	406.454
CNOT9	1.33983	3.1619	46.6099	3.32461e-182	4.64257e-181	406.345
GABARAPL2	-2.51092	5.44157	-46.6039	3.5012e-182	4.88471e-181	406.294
USB1	-2.74544	4.63806	-46.5942	3.80574e-182	5.30473e-181	406.21
CBX5	2.54699	2.53601	46.5809	4.26746e-182	5.94288e-181	406.096
JMJD7	-1.56528	1.55778	-46.578	4.37159e-182	6.08234e-181	406.071
SNORD19C	2.3541	0.728782	46.577	4.40947e-182	6.12944e-181	406.063
RNA5SP219	2.73971	0.87311	46.5364	6.24856e-182	8.67798e-181	405.714
FPR1	-6.69663	6.98596	-46.5298	6.61526e-182	9.1789e-181	405.657
MARK2P8	3.02737	1.31288	46.5017	8.42225e-182	1.16755e-180	405.415
SNORA2B	2.85781	0.924843	46.4983	8.67311e-182	1.20124e-180	405.386
MIR1284	2.28371	0.707001	46.4966	8.80074e-182	1.21781e-180	405.371
FOXJ3	1.83481	2.98389	46.4871	9.55088e-182	1.32041e-180	405.289
AK1	-3.93489	3.05332	-46.4179	1.7304e-181	2.39012e-180	404.695
HP	-5.28818	4.1521	-46.4137	1.79549e-181	2.47778e-180	404.658
KLHL42	1.43912	1.49712	46.4095	1.86113e-181	2.56604e-180	404.622
GRK5	-1.9583	1.98562	-46.4085	1.87614e-181	2.5844e-180	404.614
NORAD	2.77321	4.20436	46.402	1.98443e-181	2.7311e-180	404.558
KXD1	-1.4779	4.69755	-46.3935	2.13465e-181	2.9352e-180	404.485
RNU6-834P	2.3283	0.720796	46.3933	2.13983e-181	2.93967e-180	404.482
ACTG1P14	1.39281	0.684634	46.3926	2.15139e-181	2.95289e-180	404.477
MIR3177	2.59982	0.804813	46.3849	2.30021e-181	3.15431e-180	404.41
SNORA33	3.87119	1.38083	46.377	2.46188e-181	3.37298e-180	404.342
FAM200B	-2.55798	3.23534	-46.3533	3.01922e-181	4.13286e-180	404.138
RAB14	1.88465	3.82749	46.3237	3.89376e-181	5.32519e-180	403.883
NRROS	3.07313	3.99446	46.3234	3.90492e-181	5.33568e-180	403.88
ZNHIT3	-1.49426	2.39779	-46.3047	4.5895e-181	6.26547e-180	403.718
EAF2	3.20048	2.71656	46.2886	5.26918e-181	7.18691e-180	403.58
SMC2	2.52893	1.67178	46.2711	6.12724e-181	8.3498e-180	403.429
RPL9P30	1.94665	0.637774	46.2668	6.3613e-181	8.66103e-180	403.392
SNORA11B	2.00396	0.620437	46.2595	6.77069e-181	9.21019e-180	403.329
IL16	-2.67457	4.63035	-46.2349	8.37506e-181	1.13825e-179	403.117
SMN1	-1.66199	1.88279	-46.2309	8.66548e-181	1.17667e-179	403.082
COPS9	-2.50012	3.76968	-46.2224	9.32921e-181	1.26567e-179	403.009
RNU6-1284P	2.36338	0.731652	46.2118	1.02178e-180	1.38499e-179	402.918
CXCL16	-4.20367	4.20668	-46.2034	1.09841e-180	1.48753e-179	402.845
TRIM69	-2.16193	2.45698	-46.1986	1.14569e-180	1.55018e-179	402.803
EIF1AX-AS1	2.20466	0.734243	46.1893	1.24064e-180	1.67717e-179	402.723
H3-3A	-4.19865	7.80847	-46.1833	1.30683e-180	1.76509e-179	402.671
AK3	2.00297	2.74985	46.1796	1.34974e-180	1.82144e-179	402.639
STX8	-1.96044	3.48112	-46.1757	1.39534e-180	1.8813e-179	402.606
IFITM3P5	1.62716	0.582246	46.1687	1.48218e-180	1.99662e-179	402.545
WRN	2.08758	1.44159	46.1628	1.56036e-180	2.10008e-179	402.494
RNU6-1011P	2.16538	0.670386	46.1618	1.57357e-180	2.116e-179	402.485
MIR6512	2.49758	0.773176	46.1569	1.64087e-180	2.20455e-179	402.444
IAH1	-1.56538	2.97884	-46.1074	2.51773e-180	3.37965e-179	402.015
TIMM23	2.22785	3.68918	46.1025	2.62679e-180	3.52295e-179	401.973
KIAA2026	1.87257	2.55702	46.1011	2.65738e-180	3.56084e-179	401.961
ATRN	1.75707	2.00432	46.0917	2.88141e-180	3.85765e-179	401.88
RNU6-1099P	2.19099	0.67831	46.0755	3.31666e-180	4.43647e-179	401.739
PDZK1IP1	-4.76578	3.66433	-46.0749	3.3321e-180	4.45322e-179	401.735
SBNO1	2.00074	2.37355	46.0716	3.42865e-180	4.57824e-179	401.706
EEF2	2.38431	8.43728	46.0198	5.36728e-180	7.16061e-179	401.258
CCT8	2.22196	5.00255	46.0111	5.78776e-180	7.71482e-179	401.182
TRIM11	-1.56075	2.96839	-46.0036	6.17558e-180	8.22457e-179	401.117
FANCL	2.00496	1.83281	46.0022	6.25235e-180	8.31956e-179	401.105
NUP153	2.14225	3.36822	45.9949	6.65485e-180	8.84741e-179	401.042
MRE11	1.71754	2.14764	45.9749	7.91795e-180	1.05175e-178	400.868
SERGEF	-1.8838	2.44773	-45.9741	7.97004e-180	1.05775e-178	400.862
MAPRE3	-2.09592	2.00078	-45.9636	8.73173e-180	1.15783e-178	400.771
KDM4A	1.75796	2.94482	45.9501	9.80739e-180	1.29933e-178	400.654
EIF3J	1.9937	3.62577	45.9198	1.27532e-179	1.68814e-178	400.391
PPIL4	1.95646	2.65756	45.851	2.31525e-179	3.06203e-178	399.795
PANK2-AS1	1.78789	0.980571	45.8443	2.45328e-179	3.24178e-178	399.737
MT-ND4L	3.67592	10.2159	45.8431	2.47886e-179	3.27275e-178	399.726
TXNL1	-1.70641	3.33893	-45.8374	2.60396e-179	3.43493e-178	399.677
SON	2.32002	5.20093	45.8172	3.10289e-179	4.08953e-178	399.502
SPCS1	-2.21213	4.58495	-45.8156	3.14718e-179	4.14433e-178	399.487
ZNF731P	3.37092	4.32424	45.8029	3.51361e-179	4.62287e-178	399.377
DHX29	1.51888	2.18486	45.7972	3.69092e-179	4.85197e-178	399.328
LANCL1	2.13847	2.09351	45.7789	4.32492e-179	5.68051e-178	399.169
TMEM116	-1.30682	1.42319	-45.7736	4.53032e-179	5.94517e-178	399.123
SLC30A7	1.64766	2.2043	45.7686	4.73191e-179	6.20437e-178	399.079
SMIM27	-2.27947	2.36444	-45.7612	5.04708e-179	6.61194e-178	399.015
ATP5PD	-2.12398	4.83778	-45.7065	8.11376e-179	1.06203e-177	398.54
PHOSPHO1	-4.89624	4.47377	-45.7023	8.41069e-179	1.09995e-177	398.504
AKAP8	1.44726	3.12011	45.6387	1.46235e-178	1.91083e-177	397.95
MBP	-2.38453	4.09164	-45.6361	1.49611e-178	1.95326e-177	397.927
THOC3	-1.85615	2.05089	-45.5888	2.25756e-178	2.94487e-177	397.516
NINJ1	-4.20829	5.65644	-45.5878	2.27718e-178	2.96793e-177	397.507
ACAP1	-2.55137	6.16664	-45.5818	2.39837e-178	3.1232e-177	397.455
N4BP1	-1.97976	4.18422	-45.578	2.47897e-178	3.22541e-177	397.422
SNORA77	3.19376	1.07102	45.5745	2.55676e-178	3.32379e-177	397.391
TGIF2P1	1.55361	0.527753	45.5723	2.60638e-178	3.38541e-177	397.372
MT-CYB	3.05697	10.4597	45.5718	2.61672e-178	3.39594e-177	397.368
TATDN2P2	1.9088	1.04637	45.5604	2.88898e-178	3.74609e-177	397.269
DEFA1	-9.36874	6.47156	-45.5403	3.44165e-178	4.45894e-177	397.094
RN7SL329P	1.53869	0.516327	45.5399	3.45564e-178	4.47326e-177	397.09
RNU6-877P	2.2566	0.698613	45.536	3.57401e-178	4.62256e-177	397.056
RAB5IF	-2.53834	5.88818	-45.5334	3.65588e-178	4.72445e-177	397.033
FPR2	-4.85345	4.36492	-45.5324	3.68681e-178	4.76038e-177	397.025
PDCD7	1.47488	2.28541	45.5282	3.82483e-178	4.93275e-177	396.988
GLO1	2.26705	3.73293	45.5281	3.82677e-178	4.93275e-177	396.988
CHKB-CPT1B	-2.10742	1.96931	-45.5102	4.47249e-178	5.76023e-177	396.831
CDK3	-2.02176	1.78585	-45.4818	5.72867e-178	7.37186e-177	396.584
SLC45A4	-2.89223	3.00763	-45.4727	6.20302e-178	7.97553e-177	396.504
C20orf96	2.57136	2.05563	45.4466	7.7856e-178	1.00019e-176	396.277
RN7SL382P	2.57058	0.982101	45.4391	8.3096e-178	1.06661e-176	396.212
FBXO41	2.07775	2.01601	45.4326	8.80151e-178	1.1288e-176	396.154
GRAP	-2.11215	1.93178	-45.4025	1.14357e-177	1.4654e-176	395.892
EPRS1	2.1552	3.50944	45.3969	1.20162e-177	1.5385e-176	395.842
DNLZ	-2.26143	1.77597	-45.3806	1.38428e-177	1.77088e-176	395.701
KAT6B	2.08123	1.78772	45.3436	1.91255e-177	2.44463e-176	395.377
MALAT1	4.01208	7.9026	45.3241	2.26792e-177	2.89645e-176	395.207
RNU6-789P	2.78474	0.862032	45.3013	2.76599e-177	3.52959e-176	395.008
ISY1	-1.67694	3.06693	-45.2767	3.42958e-177	4.37271e-176	394.793
AP3M1	1.73917	2.90542	45.2749	3.48333e-177	4.43754e-176	394.777
MIR8055	1.6753	0.518743	45.2745	3.49643e-177	4.45051e-176	394.774
DHX34	-2.66987	4.68257	-45.2704	3.6248e-177	4.61005e-176	394.737
TLE3	-3.33827	5.08121	-45.2418	4.65552e-177	5.916e-176	394.487
RNASET2	-3.35967	6.31519	-45.2409	4.68847e-177	5.95292e-176	394.48
MSH6	1.67595	2.34529	45.226	5.34442e-177	6.78012e-176	394.349
MIR3680-1	2.19142	0.678442	45.221	5.57989e-177	7.07296e-176	394.306
MIR1273H	2.61835	0.822225	45.2166	5.79817e-177	7.34354e-176	394.267
ARPC4	-2.45927	6.23636	-45.2136	5.95413e-177	7.53482e-176	394.241
TRAM2	1.86958	1.85201	45.2108	6.10457e-177	7.71879e-176	394.216
TOPBP1	1.9284	3.19163	45.2031	6.5289e-177	8.24849e-176	394.149
CFLAR	-2.51281	5.60329	-45.189	7.38312e-177	9.31997e-176	394.026
CMC2	-2.48484	2.5974	-45.1858	7.591e-177	9.57445e-176	393.998
NUP210	3.46185	4.31509	45.1767	8.22002e-177	1.03593e-175	393.918
HMOX2	-1.90975	3.68181	-45.1637	9.21063e-177	1.15981e-175	393.804
SURF4	1.87581	5.12112	45.16	9.51841e-177	1.19758e-175	393.771
ZBTB39	1.12053	0.985501	45.1511	1.02863e-176	1.29312e-175	393.694
GNL3	2.30973	3.36984	45.1491	1.04721e-176	1.3154e-175	393.676
CKAP2	2.47582	2.3871	45.141	1.12367e-176	1.41027e-175	393.605
CALR	3.34828	7.19115	45.1348	1.18703e-176	1.48857e-175	393.55
HNRNPRP1	1.7453	0.593938	45.1228	1.31803e-176	1.6515e-175	393.446
ZC3H7B	1.74982	2.60934	45.1131	1.43439e-176	1.79582e-175	393.361
LARP4	1.5865	1.63515	45.1129	1.43713e-176	1.79777e-175	393.359
MIR4706	1.88964	0.585065	45.1073	1.50979e-176	1.88711e-175	393.31
RABEP1	1.73742	2.85727	45.1013	1.59101e-176	1.987e-175	393.257
RALY	-1.61648	5.63809	-45.0997	1.6129e-176	2.0127e-175	393.244
LATS1	1.92429	2.055	45.0985	1.63003e-176	2.0324e-175	393.233
ACAP2-IT1	2.35591	1.10721	45.0826	1.87496e-176	2.33589e-175	393.093
CARS2	-2.48357	4.65486	-45.054	2.40842e-176	2.99804e-175	392.842
ZNF280C	1.17913	0.786574	45.052	2.45137e-176	3.04901e-175	392.825
COA8	-1.69222	2.70903	-45.0235	3.14554e-176	3.90924e-175	392.575
PHKG2	-1.78214	3.66722	-45.0222	3.18328e-176	3.95292e-175	392.563
SDHAF2	-1.76549	3.70507	-44.9989	3.90511e-176	4.84532e-175	392.359
MCUR1P1	1.63279	0.609406	44.9929	4.11458e-176	5.10107e-175	392.306
RIF1	2.03349	1.81321	44.9838	4.45483e-176	5.51841e-175	392.227
JPT1	-3.13349	5.68612	-44.9812	4.5575e-176	5.64101e-175	392.204
CIAO1	1.21548	4.08242	44.9811	4.56287e-176	5.64308e-175	392.203
MAPK3	-2.5042	5.22552	-44.9776	4.70439e-176	5.81339e-175	392.172
PLAGL2	1.99806	2.6806	44.9758	4.78002e-176	5.90207e-175	392.156
TCTN3	1.73913	2.51815	44.9643	5.28622e-176	6.52181e-175	392.056
RNA5SP195	2.69212	0.845547	44.9538	5.79745e-176	7.14676e-175	391.963
KIFC3	-2.41158	2.20239	-44.9471	6.15191e-176	7.57759e-175	391.904
POLR1A	1.69779	1.55106	44.9469	6.16114e-176	7.58282e-175	391.902
UBXN4	2.2944	4.28609	44.9095	8.55046e-176	1.0515e-174	391.574
NEDD9	-2.91634	3.30472	-44.8888	1.02599e-175	1.2607e-174	391.392
CARHSP1	-2.16789	4.07426	-44.8858	1.0538e-175	1.29384e-174	391.365
MTCO1P2	2.75923	0.854139	44.8794	1.11426e-175	1.36696e-174	391.309
PLIN5	-4.08803	2.99832	-44.8705	1.20471e-175	1.47674e-174	391.231
DUTP2	2.06742	0.687535	44.8675	1.23732e-175	1.51549e-174	391.205
KCTD3	1.93326	1.451	44.8529	1.40587e-175	1.72056e-174	391.077
GLE1	1.47892	3.45723	44.8495	1.4496e-175	1.77265e-174	391.046
RNU6-60P	2.69466	0.834158	44.8375	1.61092e-175	1.96834e-174	390.94
ZBTB5	1.58139	1.68881	44.8252	1.79472e-175	2.19117e-174	390.832
CDKN2D	-3.2409	5.55969	-44.8209	1.86389e-175	2.27379e-174	390.794
TPP1	2.55531	6.41973	44.8199	1.87974e-175	2.2913e-174	390.786
ZFR	2.08712	3.59769	44.8178	1.91554e-175	2.33307e-174	390.767
MYB-AS1	2.5462	0.838155	44.8119	2.01598e-175	2.45344e-174	390.716
MIR3680-2	1.88594	0.583921	44.8068	2.10957e-175	2.5653e-174	390.671
KIT	4.98575	1.952	44.7903	2.43775e-175	2.96201e-174	390.526
VAPB	-1.104	2.41788	-44.7825	2.61225e-175	3.17151e-174	390.457
PAXBP1	2.12134	2.6669	44.778	2.71803e-175	3.29731e-174	390.417
CBWD6	-2.02227	1.6362	-44.7534	3.37412e-175	4.08998e-174	390.201
AATK	-3.48846	3.16099	-44.7434	3.68388e-175	4.46191e-174	390.113
DEFA1B	-9.55533	6.59974	-44.6933	5.72713e-175	6.9312e-174	389.671
LUC7L3	2.53547	4.60329	44.6828	6.283e-175	7.5979e-174	389.578
A1BG	-2.37251	2.11903	-44.6808	6.39205e-175	7.72364e-174	389.561
MIR3186	5.34793	1.65515	44.672	6.90665e-175	8.33883e-174	389.484
UBE2V1P1	2.28502	0.840857	44.6669	7.22761e-175	8.71945e-174	389.438
PAICS	2.44857	2.87066	44.6514	8.28176e-175	9.98328e-174	389.302
LUZP1	2.11544	1.62721	44.636	9.48785e-175	1.14281e-173	389.166
GPR89A	-1.37184	1.5413	-44.6348	9.58683e-175	1.15382e-173	389.156
G3BP1	1.90532	3.22704	44.574	1.63851e-174	1.97047e-173	388.619
IARS2	1.86639	3.14823	44.5672	1.73964e-174	2.09044e-173	388.559
WDR36	1.63819	1.72652	44.5662	1.75569e-174	2.10807e-173	388.55
ADAP1	-3.25815	3.75842	-44.5527	1.97732e-174	2.37232e-173	388.431
LINC00216	1.70181	0.759838	44.5466	2.08629e-174	2.50109e-173	388.377
RFXAP	1.6816	1.49972	44.5388	2.23559e-174	2.67797e-173	388.308
MIR326	2.06923	0.640635	44.5244	2.53954e-174	3.03968e-173	388.181
TEX10	1.7117	2.32674	44.5191	2.66118e-174	3.18277e-173	388.134
TM9SF1	-2.05619	2.19795	-44.5027	3.07504e-174	3.67486e-173	387.989
TTLL3	-2.02351	4.57293	-44.4935	3.33603e-174	3.98365e-173	387.908
RAD52	1.81581	2.14969	44.4905	3.42408e-174	4.08558e-173	387.882
SLC37A3	-3.25249	2.64985	-44.4861	3.56102e-174	4.24565e-173	387.842
AGPS	1.97025	2.066	44.4745	3.94386e-174	4.69843e-173	387.74
NBPF15	-1.77968	1.85922	-44.472	4.03242e-174	4.80018e-173	387.718
RN7SL648P	3.24078	1.20459	44.4667	4.22765e-174	5.02866e-173	387.671
WLS	-3.46209	2.59555	-44.4571	4.59887e-174	5.46595e-173	387.586
ZNF143	-1.43606	3.08534	-44.4557	4.65875e-174	5.53281e-173	387.573
SNORA30	1.69637	0.525261	44.4418	5.2649e-174	6.24782e-173	387.451
ROCK2	1.71867	1.73591	44.4209	6.33642e-174	7.51354e-173	387.266
RTF2	-1.81423	5.4661	-44.386	8.6242e-174	1.02184e-172	386.957
CYB561D2	-1.46818	2.1897	-44.3837	8.80275e-174	1.04218e-172	386.937
DEK	2.72775	4.12327	44.3665	1.02435e-173	1.21181e-172	386.785
RNU7-45P	2.78105	0.860892	44.3505	1.1802e-173	1.39511e-172	386.643
RNU6-268P	1.94874	0.603352	44.3406	1.2882e-173	1.5216e-172	386.556
MIR32	1.62638	0.503606	44.3361	1.34053e-173	1.58217e-172	386.516
ARF1P2	1.79226	0.596933	44.3334	1.37402e-173	1.62045e-172	386.491
ZNF511	-1.74262	2.70159	-44.3142	1.62854e-173	1.91913e-172	386.321
RNU6-141P	2.33458	0.722742	44.2912	1.99479e-173	2.34892e-172	386.118
GPR89B	-1.31458	1.60636	-44.276	2.2836e-173	2.68692e-172	385.983
UFL1	1.97576	1.97607	44.2602	2.62631e-173	3.08778e-172	385.843
DHRS1	-1.89025	3.15446	-44.2599	2.63409e-173	3.09455e-172	385.84
TRAPPC11	1.52638	3.00496	44.2557	2.73259e-173	3.20779e-172	385.803
ATP5MC2P3	2.29164	0.880143	44.2286	3.47508e-173	4.07627e-172	385.562
TRAPPC12	-1.70592	3.82234	-44.2256	3.56776e-173	4.18176e-172	385.536
EXOSC6	1.52461	1.78297	44.2255	3.57076e-173	4.18207e-172	385.535
BTBD3	1.79596	1.32266	44.2225	3.66864e-173	4.29341e-172	385.508
SLC26A11	-2.23565	2.09279	-44.2199	3.75245e-173	4.38812e-172	385.486
CCDC88A	2.50859	2.76016	44.2004	4.46266e-173	5.21464e-172	385.312
ARSG	-2.4662	2.1239	-44.184	5.16141e-173	6.02652e-172	385.167
BORCS6	-1.77158	2.32165	-44.1627	6.23213e-173	7.27113e-172	384.978
BTAF1	2.6867	2.93387	44.1501	6.96754e-173	8.12294e-172	384.866
EPS15	2.0914	3.75728	44.1305	8.2935e-173	9.66139e-172	384.692
TCF12	2.0984	2.61835	44.1159	9.43693e-173	1.0985e-171	384.563
RFFL	-1.50474	3.02347	-44.1064	1.02746e-172	1.19509e-171	384.478
HDDC3	-1.55506	2.21144	-44.1062	1.02868e-172	1.1956e-171	384.476
SF3A3	1.65226	3.9049	44.106	1.03075e-172	1.19635e-171	384.474
POLR1F	2.72044	1.9132	44.106	1.03089e-172	1.19635e-171	384.474
MIR1972-1	1.92705	0.596641	44.0913	1.17421e-172	1.36164e-171	384.344
FAM204A	-1.64223	2.52227	-44.0874	1.21617e-172	1.40923e-171	384.309
RNY3P12	1.72623	0.534502	44.0821	1.27456e-172	1.47577e-171	384.262
MIR4677	2.30877	0.714755	44.0789	1.31122e-172	1.51706e-171	384.234
WRAP73	-1.78861	2.84211	-44.0733	1.37762e-172	1.59267e-171	384.184
TMEM258	-1.9764	4.54828	-44.0392	1.86587e-172	2.15551e-171	383.88
NONO	1.94243	6.02828	44.0301	2.02353e-172	2.33587e-171	383.799
FAM193A	1.32043	3.15573	44.0226	2.16295e-172	2.49492e-171	383.733
MIR5692C2	2.68796	0.832086	44.0067	2.49106e-172	2.87121e-171	383.591
CRKL	1.61883	3.6972	43.9854	3.01032e-172	3.4671e-171	383.402
MIR4744	2.25658	0.698605	43.9848	3.02477e-172	3.48111e-171	383.397
ASS1P1	3.25163	1.58821	43.9738	3.33622e-172	3.83665e-171	383.299
CDV3	1.66017	5.02561	43.9625	3.68994e-172	4.24023e-171	383.198
ECE1	-3.43706	4.09525	-43.9571	3.87079e-172	4.4447e-171	383.15
PRPS2	2.03437	2.70642	43.9522	4.04497e-172	4.64122e-171	383.106
PRAF2	-2.01826	3.34165	-43.952	4.04915e-172	4.64252e-171	383.105
TRAM1	2.33538	4.63547	43.9492	4.15392e-172	4.75907e-171	383.08
RNVU1-4	3.36096	1.19994	43.9484	4.18276e-172	4.78851e-171	383.073
RAD54L2	1.42878	1.7358	43.9341	4.75027e-172	5.43413e-171	382.945
CAPN10	-1.7702	2.89619	-43.9332	4.78671e-172	5.47171e-171	382.938
NAPA	-2.51097	5.26683	-43.9308	4.89202e-172	5.58789e-171	382.916
MALSU1	-2.11648	2.68616	-43.9188	5.44127e-172	6.21062e-171	382.809
TRIOBP	-2.56869	3.08904	-43.9184	5.46065e-172	6.22808e-171	382.806
UFM1	1.95622	2.76938	43.9034	6.24114e-172	7.11294e-171	382.672
XPOT	2.06111	2.88011	43.8994	6.47102e-172	7.36943e-171	382.636
ZZZ3	1.64267	1.80651	43.8981	6.54657e-172	7.4499e-171	382.624
MXD3	-3.66462	4.20958	-43.8908	6.9806e-172	7.93789e-171	382.56
NOP58	2.84632	3.81851	43.8802	7.67682e-172	8.72309e-171	382.465
PCOLCE	-2.14335	2.0014	-43.8701	8.39651e-172	9.53376e-171	382.375
TM7SF3	3.26	4.25147	43.8466	1.0349e-171	1.17419e-170	382.166
P2RY8	3.00555	4.28712	43.8358	1.13931e-171	1.29169e-170	382.07
ZFHX2-AS1	-1.44584	1.43098	-43.8348	1.14947e-171	1.30225e-170	382.061
POGK	1.34111	2.38523	43.8275	1.22749e-171	1.38961e-170	381.995
PCSK7	-2.59553	3.86613	-43.8189	1.3248e-171	1.49865e-170	381.919
TASOR2	2.08181	2.08959	43.8168	1.3501e-171	1.52615e-170	381.9
USP24	2.25637	3.05538	43.7836	1.81557e-171	2.05079e-170	381.604
RNU5B-2P	2.70104	0.905495	43.7733	1.99037e-171	2.24657e-170	381.512
UBXN6	-3.5759	5.73139	-43.7716	2.01968e-171	2.27797e-170	381.497
FASTKD1	2.17363	2.25233	43.7461	2.53623e-171	2.85846e-170	381.269
IQCB1	1.76385	2.80856	43.7362	2.76887e-171	3.11835e-170	381.181
NARS1	1.85072	4.11485	43.7195	3.21387e-171	3.61685e-170	381.032
DTX2P1-UPK3BP1-PMS2P11	-1.25835	1.3883	-43.7072	3.58737e-171	4.0342e-170	380.922
UQCRBP1	1.80245	0.602302	43.6942	4.02882e-171	4.5273e-170	380.806
MIR548C	2.64478	0.818724	43.6585	5.54349e-171	6.22479e-170	380.486
UBN2	1.49979	1.41179	43.6562	5.65584e-171	6.34627e-170	380.466
ASGR1	-2.71267	2.23055	-43.6414	6.45503e-171	7.23771e-170	380.334
CDH23	-2.2942	2.06609	-43.6249	7.48336e-171	8.38455e-170	380.186
MIR3164	2.01902	0.625098	43.6044	8.98898e-171	1.00641e-169	380.003
DPY19L4	1.73199	1.37416	43.5877	1.04314e-170	1.16696e-169	379.854
MIR640	2.45849	0.761081	43.5877	1.04383e-170	1.16696e-169	379.853
CYP4F3	-3.44182	2.98262	-43.5862	1.05803e-170	1.18197e-169	379.84
HAUS8	-1.43224	1.84442	-43.5834	1.08443e-170	1.21057e-169	379.815
MIR6819	2.15508	0.667198	43.5819	1.09889e-170	1.22582e-169	379.802
EXT1	-2.6469	2.16153	-43.5802	1.11602e-170	1.24402e-169	379.786
ANXA11	-2.11512	6.20334	-43.5727	1.19285e-170	1.32869e-169	379.72
MRPS35	1.80172	2.91703	43.5717	1.20396e-170	1.34009e-169	379.71
SLC25A36	2.63969	2.70562	43.5667	1.25861e-170	1.39989e-169	379.666
MIR4263	1.62865	0.504308	43.5249	1.83056e-170	2.03457e-169	379.291
CTDSPL2	1.78717	2.05369	43.5223	1.87363e-170	2.08092e-169	379.268
FAF1-AS1	1.66695	0.518126	43.5166	1.97075e-170	2.18719e-169	379.217
AHNAK	3.67569	4.75796	43.5005	2.27709e-170	2.52533e-169	379.073
MSRA	-2.37317	3.28269	-43.4828	2.66812e-170	2.95685e-169	378.914
IMPDH2	2.74134	5.16531	43.4658	3.10586e-170	3.43946e-169	378.762
GDI2	2.20553	5.71785	43.4593	3.29093e-170	3.64175e-169	378.704
APOBEC3A	-5.43981	5.36962	-43.4462	3.70025e-170	4.09174e-169	378.587
QPCT	-4.63422	4.15284	-43.446	3.70684e-170	4.09606e-169	378.585
HS1BP3	-2.29894	2.74881	-43.4419	3.84602e-170	4.24678e-169	378.548
RPL9P32	1.55527	0.535664	43.4329	4.17098e-170	4.60227e-169	378.467
RIOK1	1.41711	2.3646	43.413	4.98344e-170	5.49476e-169	378.289
CARNMT1	1.59057	1.28661	43.4093	5.15117e-170	5.6756e-169	378.256
LYRM7	1.93219	1.43429	43.406	5.3064e-170	5.84241e-169	378.226
POLR2KP1	2.0307	0.670579	43.4057	5.32256e-170	5.85597e-169	378.223
OSTC	2.37455	4.27807	43.3933	5.94858e-170	6.54001e-169	378.112
RNU6-1043P	2.1186	0.655911	43.3901	6.12176e-170	6.72555e-169	378.083
SSBP3-AS1	1.5795	0.885455	43.3831	6.51551e-170	7.15299e-169	378.02
NAT10	2.13712	3.10026	43.3798	6.70869e-170	7.35977e-169	377.991
RBM25	2.10569	4.04262	43.3773	6.86343e-170	7.52411e-169	377.968
PRKCZ	-2.60285	2.19715	-43.3739	7.07803e-170	7.7538e-169	377.938
TRIM41	-1.32694	2.73072	-43.3735	7.10413e-170	7.7768e-169	377.934
MPZL3	-2.56995	2.69275	-43.3597	8.03523e-170	8.78976e-169	377.811
SERTAD3	-2.24001	3.36969	-43.3569	8.24437e-170	9.01207e-169	377.785
RNVU1-30	3.30799	1.23494	43.3536	8.48789e-170	9.27162e-169	377.756
BBC3	-2.67869	2.62227	-43.3534	8.50193e-170	9.28031e-169	377.754
TMEM181	1.9483	2.42691	43.3271	1.07692e-169	1.17468e-168	377.518
NUBP2	-1.94653	3.32667	-43.3242	1.10549e-169	1.20498e-168	377.491
KIF11	2.74699	1.71819	43.3226	1.12151e-169	1.22156e-168	377.477
CCNDBP1	-2.68036	5.05952	-43.2981	1.39659e-169	1.5201e-168	377.257
XRCC2	1.7023	0.768721	43.2842	1.58192e-169	1.7206e-168	377.133
RNU6-94P	2.19903	0.680797	43.2741	1.73244e-169	1.88296e-168	377.042
NBPF19	-1.7974	2.11377	-43.2737	1.73914e-169	1.8889e-168	377.038
EHD1	-2.46489	5.16117	-43.2453	2.24471e-169	2.43627e-168	376.783
RNU6-312P	1.92218	0.595133	43.2357	2.44489e-169	2.65165e-168	376.697
LMAN1	2.59404	2.57829	43.2248	2.69833e-169	2.92444e-168	376.598
ABL1	2.12584	2.7918	43.2172	2.8886e-169	3.12843e-168	376.53
SEC24B	1.77691	2.99623	43.2085	3.12377e-169	3.38073e-168	376.452
LDB1	2.26274	5.04256	43.2046	3.23386e-169	3.49738e-168	376.417
ATP8B1	1.76242	0.860781	43.1984	3.42066e-169	3.69679e-168	376.361
UBE2B	-2.49639	5.61619	-43.1819	3.96654e-169	4.2837e-168	376.213
SNHG9	-2.70972	2.91587	-43.1721	4.32991e-169	4.67281e-168	376.125
PUM3	2.03093	2.53487	43.1706	4.39134e-169	4.73576e-168	376.111
SLC35A3	1.61744	1.51022	43.1624	4.7252e-169	5.0922e-168	376.038
FNBP1	2.06753	4.92446	43.1578	4.92785e-169	5.30683e-168	375.996
PABPC1	2.24518	8.57206	43.1485	5.35755e-169	5.76551e-168	375.912
RNU7-84P	2.65692	0.822481	43.1293	6.36604e-169	6.84596e-168	375.739
AFF1	2.45494	3.36513	43.1254	6.59533e-169	7.08754e-168	375.704
MIR938	2.25495	0.698101	43.125	6.6163e-169	7.10507e-168	375.701
ISCU	-2.07988	4.8853	-43.1242	6.66474e-169	7.15205e-168	375.693
DDA1	-1.57756	3.50122	-43.1229	6.74489e-169	7.23297e-168	375.681
MIR23A	4.15212	1.28514	43.0908	9.0022e-169	9.64684e-168	375.393
FAM185BP	1.34463	0.673165	43.0814	9.7912e-169	1.0485e-167	375.308
MIR4420	3.76007	1.16382	43.0777	1.01248e-168	1.08346e-167	375.275
SIGLEC5	-3.82449	2.9511	-43.0744	1.04315e-168	1.1155e-167	375.245
PRCP	-2.96902	4.08817	-43.0723	1.06343e-168	1.13639e-167	375.226
PARK7P1	1.47001	0.560953	43.0546	1.24685e-168	1.33146e-167	375.067
TET3	1.87356	2.59223	43.0449	1.36018e-168	1.45146e-167	374.98
CASP4	-2.67079	5.67339	-43.0316	1.53336e-168	1.63512e-167	374.86
GTF2H2C	-2.14675	1.90815	-43.0274	1.59228e-168	1.69676e-167	374.822
CPQ	-2.6429	4.11493	-43.023	1.65675e-168	1.76423e-167	374.782
EZH2	2.32634	2.31169	43.0103	1.85762e-168	1.97675e-167	374.668
FTH1P4	2.17042	1.14384	43.0034	1.97786e-168	2.10324e-167	374.605
TMSB4X	-2.53091	11.1544	-42.983	2.37722e-168	2.52615e-167	374.421
ABHD17A	-2.85659	4.74211	-42.9667	2.75316e-168	2.9236e-167	374.274
APBB1	-2.51385	2.18183	-42.9429	3.41103e-168	3.61968e-167	374.059
WDR25	-1.36725	1.61868	-42.9249	4.01312e-168	4.25563e-167	373.897
PRELID1	-2.80458	5.45491	-42.9236	4.05978e-168	4.30213e-167	373.885
FDX2	-1.7222	1.54782	-42.9171	4.30402e-168	4.55778e-167	373.827
C20orf194	1.99046	1.58632	42.8926	5.36886e-168	5.68145e-167	373.605
MBTD1	2.14374	2.26076	42.8882	5.5865e-168	5.90766e-167	373.566
RANBP3	-1.21218	3.86061	-42.8863	5.6867e-168	6.00946e-167	373.548
RXRA	-3.44884	4.72077	-42.8828	5.86871e-168	6.1975e-167	373.516
DDX47	-1.65101	2.35089	-42.882	5.91103e-168	6.23788e-167	373.509
TWSG1	2.30297	1.57539	42.8789	6.07692e-168	6.4085e-167	373.482
SECTM1	-5.0057	4.88539	-42.8614	7.12092e-168	7.50428e-167	373.323
SELENON	2.46896	3.49002	42.8342	9.09782e-168	9.58098e-167	373.078
RNA5SP464	2.23789	0.692823	42.8263	9.77102e-168	1.02828e-166	373.006
RPS18P12	2.68933	1.10722	42.8205	1.0303e-167	1.08352e-166	372.953
MT-ND2	3.0562	10.5933	42.8154	1.0786e-167	1.13353e-166	372.907
RNU6-32P	1.89714	0.587386	42.7809	1.47313e-167	1.54709e-166	372.595
SMIM11B	-1.80591	1.25222	-42.7796	1.49015e-167	1.56389e-166	372.584
RNU6-1034P	1.66412	0.515282	42.7754	1.54794e-167	1.62246e-166	372.546
CMPK1	2.44285	3.83911	42.7754	1.54809e-167	1.62246e-166	372.546
snoZ196	1.68254	0.520983	42.7709	1.61233e-167	1.68863e-166	372.505
MT-TM	4.17997	1.29375	42.7707	1.61493e-167	1.69019e-166	372.503
RBMX	2.00062	5.13184	42.7617	1.75234e-167	1.83275e-166	372.422
SENP3	-1.47198	3.12253	-42.7474	1.99385e-167	2.08391e-166	372.292
GBP2	-3.59034	5.34012	-42.7344	2.24325e-167	2.34297e-166	372.175
ZNF41	1.15229	1.19804	42.7146	2.68343e-167	2.80079e-166	371.995
FKTN	1.22519	1.05777	42.7039	2.95629e-167	3.08347e-166	371.898
TTC28-AS1	-1.29601	1.70616	-42.6811	3.63261e-167	3.78631e-166	371.692
ZFAND2B	-2.12398	4.40654	-42.6759	3.80766e-167	3.96605e-166	371.645
SLC7A1	2.40158	1.89319	42.6743	3.86258e-167	4.02051e-166	371.631
GLT1D1	-4.50863	3.73882	-42.6694	4.03859e-167	4.20085e-166	371.586
MRPL46	-1.5338	1.54556	-42.6505	4.79176e-167	4.98089e-166	371.415
MIR623	2.32952	0.721174	42.647	4.9473e-167	5.13906e-166	371.383
URB1	1.53275	1.28386	42.6431	5.12511e-167	5.32013e-166	371.348
UBA52	-3.05299	9.17649	-42.6389	5.32244e-167	5.52122e-166	371.31
RNU6-522P	2.90619	0.899612	42.6324	5.64695e-167	5.85386e-166	371.251
TAZ	-1.92446	4.69369	-42.6275	5.90112e-167	6.1132e-166	371.207
TSPAN14	-2.77023	4.57043	-42.6237	6.10772e-167	6.32292e-166	371.172
CYHR1	-1.97167	3.92619	-42.6199	6.31954e-167	6.53776e-166	371.138
DDX1	1.96688	3.24117	42.5987	7.66035e-167	7.9195e-166	370.945
DFFA	1.36313	2.34679	42.5974	7.75113e-167	8.00793e-166	370.934
RNA5SP282	2.82796	0.875406	42.5962	7.83353e-167	8.08758e-166	370.923
MTERF4	-1.39174	2.67447	-42.5925	8.10284e-167	8.35996e-166	370.889
EIF4E	-1.63346	2.43566	-42.5897	8.31296e-167	8.57095e-166	370.864
USP14	1.73111	2.79235	42.5878	8.45782e-167	8.71442e-166	370.846
SCMH1	2.54619	2.75104	42.586	8.59292e-167	8.84763e-166	370.83
SFT2D2	1.94233	2.61123	42.5789	9.16488e-167	9.43018e-166	370.766
RBM23	-1.88724	4.27243	-42.5596	1.09144e-166	1.12228e-165	370.591
ARGFXP2	1.37669	0.630965	42.5421	1.27915e-166	1.3144e-165	370.432
TSPYL1	1.63398	3.23308	42.5419	1.28148e-166	1.31592e-165	370.431
MIR320E	3.09629	1.02303	42.54	1.30412e-166	1.33826e-165	370.413
EI24	1.69841	2.97627	42.534	1.37703e-166	1.41213e-165	370.359
RNU6-1306P	1.96105	0.60716	42.5319	1.40346e-166	1.43826e-165	370.34
RNF139	2.18578	3.24415	42.5197	1.56814e-166	1.60594e-165	370.228
C5orf15	2.23598	3.36584	42.5192	1.57492e-166	1.6118e-165	370.224
ATP6V1D	-1.9367	3.6472	-42.5187	1.58212e-166	1.61809e-165	370.22
ZKSCAN1	2.05891	2.78762	42.5185	1.58477e-166	1.61971e-165	370.218
RAD17	1.33886	2.27087	42.5146	1.64207e-166	1.67716e-165	370.182
PIK3C3	-1.71402	3.32985	-42.511	1.69652e-166	1.7316e-165	370.15
FAM214B	-2.45512	4.07886	-42.5099	1.71369e-166	1.74797e-165	370.14
ZBED6	2.27104	1.21406	42.5093	1.72228e-166	1.75555e-165	370.135
RPS29	-3.91946	7.2868	-42.4926	2.00455e-166	2.04191e-165	369.983
TBCCD1	1.10147	1.65698	42.4921	2.01424e-166	2.05041e-165	369.978
ASB14	1.00812	0.61624	42.4778	2.2923e-166	2.33191e-165	369.849
URI1	1.85646	3.01826	42.463	2.62331e-166	2.66686e-165	369.714
VN1R83P	2.13075	0.949447	42.4566	2.77844e-166	2.82268e-165	369.656
AARSD1	-1.91818	2.47555	-42.453	2.87155e-166	2.91533e-165	369.623
RINL	-2.17063	3.0204	-42.4389	3.26526e-166	3.31284e-165	369.494
SET	2.35413	5.49466	42.4285	3.58571e-166	3.63554e-165	369.401
SSU72	-1.7342	4.8872	-42.4203	3.86462e-166	3.91572e-165	369.326
TECPR1	-1.83278	2.98378	-42.4156	4.03295e-166	4.08357e-165	369.283
COL18A1	-3.43726	3.26878	-42.4105	4.22417e-166	4.27434e-165	369.237
TP53	2.28442	3.56387	42.3991	4.68353e-166	4.73602e-165	369.133
POLA1	1.54406	1.34021	42.3473	7.50011e-166	7.57913e-165	368.662
RNU6-430P	2.08341	0.645022	42.3416	7.90435e-166	7.98235e-165	368.61
BCAS3	-1.56505	2.29363	-42.3407	7.96408e-166	8.03734e-165	368.602
EIF4G2	1.99556	6.37755	42.3263	9.07861e-166	9.15607e-165	368.471
SNORD37	1.73507	0.537238	42.3079	1.07322e-165	1.08166e-164	368.304
RPL23AP11	1.45292	0.510449	42.3057	1.0951e-165	1.10299e-164	368.283
ACAD11	-1.53147	1.21709	-42.2765	1.42822e-165	1.43755e-164	368.018
SOX12	2.50019	1.72653	42.2757	1.43924e-165	1.44769e-164	368.01
MIR6769A	1.62651	0.503646	42.2403	1.98617e-165	1.99651e-164	367.688
TMEM87B	1.74133	2.2119	42.2379	2.02991e-165	2.03914e-164	367.666
EEF1A1P12	1.90848	0.889477	42.2369	2.04861e-165	2.05656e-164	367.657
SNORD53B	2.03817	0.631023	42.2343	2.09691e-165	2.10367e-164	367.633
ARL8B	2.03415	4.37112	42.2327	2.1289e-165	2.13436e-164	367.618
SNHG3	2.78684	3.69457	42.227	2.24203e-165	2.2463e-164	367.566
LRWD1	-2.54151	3.08384	-42.2256	2.27132e-165	2.27415e-164	367.553
TOM1	-2.92171	4.95771	-42.2246	2.29084e-165	2.2922e-164	367.545
EEF1B2	3.13064	6.61906	42.2133	2.5392e-165	2.53903e-164	367.442
DNAH17	-3.19229	2.64887	-42.196	2.97409e-165	2.97195e-164	367.284
RAD50	1.74145	1.84709	42.1959	2.9767e-165	2.97261e-164	367.283
DEF8	-2.9433	4.25754	-42.1626	4.03121e-165	4.02303e-164	366.979
NPL	-3.6567	3.90536	-42.1592	4.15544e-165	4.1443e-164	366.949
SNORD72	1.65108	0.511249	42.1562	4.27251e-165	4.25827e-164	366.921
ABHD5	-2.96348	4.32485	-42.1531	4.39323e-165	4.37572e-164	366.893
POLDIP2	1.36458	4.27215	42.1281	5.51954e-165	5.49396e-164	366.665
RNF38	1.59848	3.34012	42.1219	5.83914e-165	5.80829e-164	366.608
WIPI2	-1.28508	4.03935	-42.1116	6.41453e-165	6.37648e-164	366.514
TEX264	-1.81502	3.45187	-42.1089	6.57671e-165	6.53344e-164	366.489
IARS1	2.44721	3.29725	42.0946	7.49214e-165	7.438e-164	366.359
SH3BGRL	2.41898	6.08547	42.0941	7.52896e-165	7.46968e-164	366.354
FAM136A	1.685	2.94632	42.0672	9.61723e-165	9.53531e-164	366.109
CBWD2	-1.46614	2.08688	-42.0617	1.01206e-164	1.00278e-163	366.058
TARBP1	2.87256	3.14134	42.061	1.01809e-164	1.00811e-163	366.052
MAP3K5-AS1	1.86179	0.664331	42.0598	1.02934e-164	1.01858e-163	366.041
PELATON	-4.89252	4.978	-42.0547	1.078e-164	1.06605e-163	365.995
NMRK1	-2.08745	2.79802	-42.052	1.10528e-164	1.09231e-163	365.97
PIGC	-1.5158	2.83617	-42.0476	1.1506e-164	1.13636e-163	365.93
PPFIBP2	-1.8739	1.77246	-42.0467	1.1602e-164	1.1451e-163	365.921
BRF1	-1.83776	2.24113	-42.0457	1.1704e-164	1.15442e-163	365.913
CENPJ	2.33709	1.6824	42.0302	1.34857e-164	1.3293e-163	365.771
SLC25A6	2.19373	7.157	42.0225	1.44639e-164	1.42481e-163	365.701
PABIR2	1.82218	3.12049	42.0063	1.67689e-164	1.6508e-163	365.553
SFPQ	1.95813	6.25569	42.0012	1.75744e-164	1.72898e-163	365.506
C1orf122	-2.22862	3.02855	-41.9867	2.00595e-164	1.9722e-163	365.373
EID1	2.18354	4.34128	41.9854	2.03049e-164	1.99504e-163	365.361
MT-RNR2	4.67732	11.7317	41.9779	2.17491e-164	2.13555e-163	365.292
RNU6-377P	2.33841	0.723925	41.971	2.31587e-164	2.2725e-163	365.23
PRKACA	-2.45016	4.64071	-41.9547	2.68807e-164	2.63604e-163	365.08
TRIM39	-1.43938	2.1677	-41.9522	2.75021e-164	2.69524e-163	365.058
EBLN2	2.08825	1.50947	41.9244	3.54606e-164	3.47295e-163	364.803
SETD2	1.65472	3.4942	41.9119	3.97344e-164	3.88903e-163	364.689
SELENOI	1.55602	1.35321	41.9041	4.26956e-164	4.17617e-163	364.617
RNU6-613P	1.91194	0.591966	41.8953	4.62741e-164	4.52329e-163	364.537
TBC1D5	1.69862	2.72501	41.8911	4.809e-164	4.69778e-163	364.498
LTN1	1.73571	1.79023	41.886	5.03811e-164	4.91844e-163	364.452
NIPSNAP3A	2.31662	2.91201	41.8857	5.04933e-164	4.92625e-163	364.45
CNBP	1.71834	6.83283	41.8835	5.15416e-164	5.02531e-163	364.429
MAPRE1	1.76161	5.15766	41.8818	5.23713e-164	5.10294e-163	364.413
SNORD36C	1.97199	0.610545	41.8644	6.13601e-164	5.97497e-163	364.255
HERC2P10	2.12297	0.720847	41.8644	6.14034e-164	5.97537e-163	364.254
LRPAP1	-2.89583	5.3143	-41.862	6.27439e-164	6.10193e-163	364.232
PIN1	-1.82606	3.93187	-41.8531	6.80448e-164	6.61323e-163	364.151
ZBTB40	1.58562	2.34792	41.8464	7.23617e-164	7.0283e-163	364.089
SLC25A37	-4.16343	7.81255	-41.8301	8.40425e-164	8.15763e-163	363.94
MIR624	2.12174	0.656884	41.8257	8.75128e-164	8.48907e-163	363.899
MVP	-3.06484	5.61744	-41.816	9.55803e-164	9.26576e-163	363.811
COX5BP6	1.89711	0.685593	41.8003	1.10437e-163	1.06992e-162	363.666
MIEN1	-2.14511	3.99371	-41.7993	1.11359e-163	1.07817e-162	363.658
SLC25A53	-1.25452	1.32594	-41.7967	1.14122e-163	1.10421e-162	363.634
LSMEM1	-2.73216	2.27896	-41.7867	1.25087e-163	1.20955e-162	363.542
RPL22P3	1.78258	0.656388	41.7703	1.45318e-163	1.40428e-162	363.392
ZNF707	-1.33951	1.83167	-41.7698	1.45972e-163	1.40971e-162	363.387
ANAPC1P2	-1.61733	2.66154	-41.76	1.59685e-163	1.54116e-162	363.297
MCFD2	1.64919	2.83084	41.7593	1.60701e-163	1.54998e-162	363.291
CRYZP1	1.16142	0.500618	41.7584	1.6207e-163	1.5622e-162	363.283
TMEM123	3.02207	4.99554	41.754	1.68734e-163	1.62541e-162	363.242
ARHGAP9	-2.77512	7.04499	-41.7514	1.72857e-163	1.66407e-162	363.218
IL3RA	3.5258	3.36903	41.7508	1.73811e-163	1.6722e-162	363.213
SASS6	1.3076	0.998174	41.7455	1.82392e-163	1.75365e-162	363.164
KIF20B	1.90568	1.13879	41.7402	1.9138e-163	1.83891e-162	363.116
YWHAE	1.74372	5.96847	41.7401	1.91673e-163	1.84057e-162	363.115
BMS1	1.17499	1.81396	41.7324	2.05732e-163	1.97433e-162	363.044
ANXA3	-5.32552	4.26258	-41.7233	2.2346e-163	2.14311e-162	362.961
AMDHD2	-2.78331	3.21199	-41.7158	2.39365e-163	2.2942e-162	362.892
CNNM4	1.48159	1.62809	41.7157	2.39669e-163	2.29567e-162	362.891
BSCL2	-2.22879	2.65705	-41.6938	2.9311e-163	2.8058e-162	362.69
SPACA6	-2.36909	2.01978	-41.6893	3.0527e-163	2.92036e-162	362.649
ZNF236	1.21085	1.13669	41.6702	3.6385e-163	3.47859e-162	362.473
RFXANK	-1.92565	4.6147	-41.6693	3.66963e-163	3.50615e-162	362.465
UBE2E1	1.85867	4.0043	41.6683	3.7033e-163	3.53611e-162	362.456
ZNF660	1.54189	0.77299	41.6563	4.13478e-163	3.94563e-162	362.345
MYSM1	2.08074	2.49192	41.6476	4.4766e-163	4.26915e-162	362.266
VNN2	-6.06271	6.41144	-41.6444	4.61133e-163	4.39488e-162	362.236
VAPA	-2.38846	5.54979	-41.6385	4.86509e-163	4.63384e-162	362.182
TPM1	-2.97901	2.67647	-41.6303	5.24544e-163	4.99299e-162	362.107
HARS1	-1.27908	3.25315	-41.6024	6.77982e-163	6.4495e-162	361.85
PINX1	-0.87041	0.93938	-41.596	7.18705e-163	6.83262e-162	361.792
AMY2B	-2.10066	2.3953	-41.5878	7.75489e-163	7.36787e-162	361.716
MIR320C1	1.95352	0.60483	41.587	7.80653e-163	7.41231e-162	361.709
WBP11	1.63943	3.36627	41.581	8.25284e-163	7.83121e-162	361.654
RTRAF	-1.50198	4.12116	-41.5756	8.66699e-163	8.21909e-162	361.605
RNA5SP159	1.81507	0.561992	41.5563	1.03482e-162	9.80727e-162	361.427
RNU4-9P	2.81434	0.871191	41.5558	1.03972e-162	9.84761e-162	361.422
NAGK	-2.50512	5.36666	-41.5461	1.13737e-162	1.07659e-161	361.333
RFC3	1.84515	1.5499	41.5449	1.15006e-162	1.08792e-161	361.321
RPL7P52	1.63097	0.600481	41.5445	1.15391e-162	1.09088e-161	361.318
CCT4	2.34205	4.86688	41.543	1.16971e-162	1.10513e-161	361.305
SQSTM1	-2.37362	5.37702	-41.5424	1.17683e-162	1.11118e-161	361.298
SCML4	-2.06972	1.96854	-41.5291	1.32948e-162	1.25453e-161	361.176
TOP1	1.98477	4.33234	41.5276	1.34742e-162	1.27068e-161	361.163
NEU1	-1.72338	3.52518	-41.5228	1.40899e-162	1.32791e-161	361.118
FCHSD2	1.91594	3.56016	41.5118	1.55887e-162	1.46826e-161	361.017
PITPNB	1.14316	3.08656	41.5023	1.70056e-162	1.60073e-161	360.93
TMED1	-1.75516	3.03531	-41.4927	1.85781e-162	1.74768e-161	360.842
RNU6-1316P	1.73317	0.536649	41.4922	1.86605e-162	1.75434e-161	360.837
RNF10	-2.3311	7.01213	-41.4766	2.15361e-162	2.02344e-161	360.694
PHACTR2-AS1	1.74334	0.600463	41.4728	2.23061e-162	2.0945e-161	360.659
SMARCA2	1.91053	4.06657	41.4697	2.29638e-162	2.15493e-161	360.629
MTND2P28	4.51181	6.14404	41.4438	2.91277e-162	2.73167e-161	360.391
CASP2	2.23554	3.72275	41.4386	3.05499e-162	2.86328e-161	360.344
CHD4	2.08069	5.17823	41.4361	3.12803e-162	2.92993e-161	360.32
DRG1	1.46921	3.79767	41.4273	3.39003e-162	3.17339e-161	360.24
TREML3P	-2.99652	2.35091	-41.4129	3.87173e-162	3.62208e-161	360.107
TMEM234	-1.69685	2.87919	-41.4127	3.87798e-162	3.62571e-161	360.105
SNORA71C	4.09368	1.5201	41.4095	3.9933e-162	3.73124e-161	360.076
SYNE2	-2.67336	2.51491	-41.4041	4.19845e-162	3.92053e-161	360.026
CDCA4	1.78758	2.10999	41.4014	4.30337e-162	4.01604e-161	360.001
RNA5SP33	2.58459	0.800101	41.3908	4.74343e-162	4.42401e-161	359.903
HNRNPA1P76	1.64783	0.641706	41.374	5.53849e-162	5.16237e-161	359.748
CDC34	-2.66375	5.06958	-41.3723	5.62713e-162	5.24179e-161	359.732
PAK1IP1	1.77224	1.76853	41.3601	6.29692e-162	5.86213e-161	359.62
PRPSAP1	-1.32455	2.8632	-41.3526	6.74519e-162	6.27562e-161	359.551
DHX15	1.8024	4.09733	41.3214	8.99762e-162	8.36614e-161	359.263
TCEAL8	2.05839	3.05552	41.3191	9.18291e-162	8.53322e-161	359.242
RNU6-5P	1.93326	0.641645	41.309	1.00863e-161	9.36698e-161	359.148
ZRANB2	2.60461	3.91283	41.2922	1.17754e-161	1.0929e-160	358.994
ZSWIM8	-1.96268	5.09625	-41.2916	1.18359e-161	1.09784e-160	358.988
COPA	1.48398	4.90594	41.2913	1.18675e-161	1.10011e-160	358.986
NFX1	1.34379	2.85318	41.2901	1.20008e-161	1.11179e-160	358.975
ING1	-1.89774	2.75917	-41.2864	1.24177e-161	1.14971e-160	358.94
GAK	-1.66712	4.67113	-41.2841	1.26833e-161	1.17359e-160	358.919
NDUFS5	2.28745	5.68118	41.2639	1.52785e-161	1.41287e-160	358.733
ZC3H14	-1.05102	1.97718	-41.26	1.58415e-161	1.46404e-160	358.697
LYRM9	-1.6095	1.44134	-41.2474	1.78004e-161	1.64408e-160	358.58
ZNF839	-1.43745	2.34056	-41.2302	2.08533e-161	1.92489e-160	358.422
URB2	1.1667	0.922912	41.2295	2.1003e-161	1.93754e-160	358.414
C12orf76	-1.40738	2.32674	-41.227	2.14921e-161	1.98146e-160	358.391
TMEM218	-1.34516	2.22875	-41.2246	2.19556e-161	2.02297e-160	358.37
ARNTL	-2.36207	2.91456	-41.2201	2.28924e-161	2.10801e-160	358.328
SOCS7	1.26754	1.44847	41.2008	2.73675e-161	2.51857e-160	358.15
ODR4	1.32011	1.93246	41.1924	2.9567e-161	2.71934e-160	358.072
LRRC8D	1.60888	2.85286	41.1751	3.4685e-161	3.18814e-160	357.912
RNA5SP394	3.56392	1.11806	41.1725	3.55452e-161	3.26524e-160	357.888
TREM1	-4.60992	5.56504	-41.1643	3.83475e-161	3.52053e-160	357.812
GTF2H3	1.48308	1.76619	41.1638	3.85071e-161	3.53306e-160	357.808
PWP1	1.44357	3.15521	41.1582	4.05513e-161	3.71838e-160	357.756
ARRB2	-2.97985	7.8599	-41.1522	4.28726e-161	3.92887e-160	357.7
TXNRD2	-1.62209	2.67406	-41.1466	4.5157e-161	4.13573e-160	357.648
NAA15	1.62818	1.97603	41.1216	5.68936e-161	5.20751e-160	357.417
CWF19L2	1.83635	2.18877	41.1195	5.79721e-161	5.30304e-160	357.398
PMS1	1.46316	1.73097	41.1129	6.16306e-161	5.63432e-160	357.337
RPL11P3	3.534	2.37736	41.0978	7.08824e-161	6.47625e-160	357.197
CEP290	1.36874	0.962033	41.0741	8.82196e-161	8.05546e-160	356.978
CTSH	-3.61796	5.17263	-41.0485	1.11792e-160	1.02017e-159	356.741
IGLC1	-5.74167	3.96504	-41.0452	1.153e-160	1.05156e-159	356.71
GPAT4	-2.40389	4.68189	-41.0338	1.28103e-160	1.16763e-159	356.605
RNU6-130P	1.69358	0.524397	41.0199	1.45748e-160	1.32766e-159	356.476
ICE1	1.45956	1.80512	41.0046	1.67879e-160	1.52835e-159	356.334
METAP2	1.96882	3.40235	41.0027	1.70902e-160	1.55495e-159	356.316
COX6CP10	1.57511	0.501244	41.0008	1.7385e-160	1.58082e-159	356.299
COX17	-1.70094	2.90246	-40.9909	1.90545e-160	1.7316e-159	356.208
NHLRC2	1.75681	1.50959	40.9701	2.30986e-160	2.09786e-159	356.015
TRIM24	2.06252	2.1955	40.9646	2.43009e-160	2.20574e-159	355.964
RALGPS1	-1.24097	1.31268	-40.943	2.96974e-160	2.69396e-159	355.763
SELENOM	-2.4831	1.85721	-40.9291	3.37814e-160	3.06262e-159	355.634
RNU6-315P	1.90688	0.590398	40.9162	3.80717e-160	3.44952e-159	355.515
PRPF38B	1.77307	3.85449	40.9095	4.04935e-160	3.66678e-159	355.453
SEC14L1P1	0.878019	0.520366	40.894	4.67499e-160	4.23079e-159	355.309
ACTG1P20	1.53672	0.800433	40.8933	4.70537e-160	4.25576e-159	355.303
POLR3A	0.90241	1.57085	40.8877	4.95604e-160	4.47983e-159	355.251
RPL5	2.49745	7.81921	40.8863	5.02108e-160	4.53593e-159	355.238
RASA4B	-2.38772	1.67778	-40.8789	5.37912e-160	4.8565e-159	355.169
KRT18P57	1.81743	0.841118	40.8674	5.98181e-160	5.39743e-159	355.063
USP15	-2.61475	5.36651	-40.8521	6.89594e-160	6.21858e-159	354.92
VPS28	-2.12109	5.73432	-40.8172	9.53717e-160	8.59529e-159	354.596
SPN	3.79028	4.92107	40.8122	9.98827e-160	8.99653e-159	354.55
RNU1-3	-3.74842	2.59795	-40.8026	1.09189e-159	9.82898e-159	354.46
AQP11	1.11235	0.702894	40.7954	1.16719e-159	1.05006e-158	354.394
RNU6-1019P	1.9671	0.609033	40.7901	1.22554e-159	1.1019e-158	354.345
STK11	-2.04814	4.06391	-40.7878	1.25238e-159	1.12537e-158	354.323
RNA5SP194	2.22637	0.703664	40.7752	1.40759e-159	1.26409e-158	354.206
SLX4IP	1.29533	1.20883	40.7591	1.63433e-159	1.46686e-158	354.057
PPIE	-1.76427	3.00503	-40.7482	1.80864e-159	1.62235e-158	353.955
CDC7	1.89351	1.52028	40.7446	1.87049e-159	1.67685e-158	353.922
MSN	1.72286	7.54739	40.7252	2.24054e-159	2.0074e-158	353.741
TTC22	-1.24473	1.0251	-40.7214	2.32171e-159	2.0789e-158	353.705
LNPEP	1.93628	2.55392	40.705	2.70413e-159	2.41991e-158	353.553
STAG3L1	-1.49942	1.44101	-40.6982	2.87953e-159	2.57537e-158	353.49
IGHJ3	4.82368	1.49294	40.6938	2.99904e-159	2.68068e-158	353.449
SERTAD2	2.21216	3.24125	40.68	3.40979e-159	3.04604e-158	353.321
TRMU	-1.37252	2.79649	-40.6591	4.14171e-159	3.69771e-158	353.126
TAF3	1.51177	1.7126	40.6442	4.75745e-159	4.24496e-158	352.988
NAIP	-4.59538	4.12627	-40.6385	5.01432e-159	4.47154e-158	352.935
PLCD1	-1.93545	2.37932	-40.6176	6.09362e-159	5.43084e-158	352.74
ZMYND11	2.05265	2.3188	40.617	6.12594e-159	5.45506e-158	352.735
NINJ2	-2.91586	3.65942	-40.617	6.12795e-159	5.45506e-158	352.734
DENND11	2.81842	2.26652	40.6161	6.17982e-159	5.49802e-158	352.726
SRI	-1.87136	4.46222	-40.6071	6.71749e-159	5.97289e-158	352.642
HNRNPF	1.62754	5.72548	40.5971	7.37663e-159	6.55514e-158	352.549
RN7SKP80	2.45839	1.16206	40.5917	7.7565e-159	6.88869e-158	352.498
RNU4-40P	2.22659	0.69637	40.551	1.13234e-158	1.00507e-157	352.12
FTH1P10	-2.93919	2.26978	-40.5399	1.25596e-158	1.11415e-157	352.016
RNU7-170P	1.97131	0.610336	40.5383	1.27446e-158	1.1299e-157	352.001
IREB2	1.66589	2.74268	40.5328	1.34234e-158	1.18938e-157	351.949
HNRNPU	1.80034	5.95535	40.529	1.38967e-158	1.2306e-157	351.915
MIR106B	2.09614	0.64896	40.5276	1.40865e-158	1.24669e-157	351.901
IFITM1	-5.01881	7.39356	-40.5049	1.74028e-158	1.5393e-157	351.69
FLT3LG	-3.4974	2.90644	-40.4984	1.84865e-158	1.63421e-157	351.629
SF3B4	1.51589	4.81604	40.4785	2.22499e-158	1.96575e-157	351.444
CREB5	-3.42782	3.2529	-40.4671	2.47561e-158	2.18591e-157	351.337
PNRC2	2.15872	4.31049	40.4595	2.65745e-158	2.34511e-157	351.266
MCCC2	1.51919	2.40225	40.453	2.82279e-158	2.48957e-157	351.206
RAB11FIP2	1.51809	1.51346	40.4484	2.94726e-158	2.59785e-157	351.162
EXOSC2	1.36335	2.62571	40.4379	3.25174e-158	2.86458e-157	351.064
RANBP9	1.79371	3.88118	40.4352	3.33376e-158	2.93514e-157	351.039
BZW2	1.92283	3.26419	40.4266	3.61251e-158	3.17871e-157	350.959
ZNF326	1.57253	1.83725	40.4231	3.73066e-158	3.28079e-157	350.926
MIR1255A	1.9649	0.608352	40.4214	3.79017e-158	3.3312e-157	350.911
CCDC92	-1.87185	2.57945	-40.417	3.95157e-158	3.47105e-157	350.869
SFXN4	1.95096	2.70045	40.4097	4.22766e-158	3.71143e-157	350.801
MT-TV	2.99958	0.928511	40.401	4.58737e-158	4.0249e-157	350.72
TSR1	1.41721	2.01238	40.3982	4.70889e-158	4.12915e-157	350.693
HBQ1	-4.64257	3.89673	-40.39	5.08004e-158	4.45204e-157	350.618
FAM216A	1.91968	1.9612	40.3866	5.24525e-158	4.59419e-157	350.586
CCDC18	1.63713	1.61609	40.3851	5.31875e-158	4.65589e-157	350.572
SPIN4	2.8363	1.35201	40.3781	5.68026e-158	4.96949e-157	350.506
BNIP3P27	1.86988	0.673107	40.3668	6.30956e-158	5.51688e-157	350.401
RCBTB1	2.34957	2.41901	40.3637	6.49416e-158	5.67504e-157	350.372
TMEM59	-2.16669	5.67641	-40.359	6.78983e-158	5.93002e-157	350.327
HSF4	-2.16048	2.15655	-40.3368	8.34879e-158	7.28739e-157	350.12
TPP2	2.17066	3.51592	40.3269	9.15641e-158	7.98776e-157	350.028
NKTR	2.40967	3.64777	40.3184	9.91328e-158	8.64309e-157	349.948
TBC1D13	1.84254	3.19792	40.3116	1.05717e-157	9.21187e-157	349.884
CEMIP2	-2.69993	3.50196	-40.3041	1.1338e-157	9.87396e-157	349.814
SNTB1	2.14052	2.53265	40.2953	1.23019e-157	1.07073e-156	349.732
RASA1	2.11057	2.61313	40.2866	1.3354e-157	1.16164e-156	349.65
GNAQ	2.6713	4.07484	40.2771	1.45912e-157	1.26854e-156	349.562
TMEM14C	2.34501	3.96973	40.277	1.46059e-157	1.26909e-156	349.561
STUB1	-1.91741	4.05285	-40.269	1.57419e-157	1.36702e-156	349.486
ITCH-IT1	1.79619	0.592475	40.267	1.60309e-157	1.39132e-156	349.467
IGKV1D-39	-4.68592	3.43728	-40.2545	1.8028e-157	1.56376e-156	349.35
NSD1	1.43958	2.89786	40.2446	1.97761e-157	1.71441e-156	349.257
MTIF2	1.41818	2.44355	40.2426	2.01458e-157	1.74547e-156	349.239
PDPR	1.98249	2.71111	40.238	2.10191e-157	1.8201e-156	349.196
PIGT	2.079	4.87688	40.2346	2.17091e-157	1.87879e-156	349.164
GATB	-1.16258	1.61817	-40.2224	2.43293e-157	2.10436e-156	349.05
MVK	-1.24424	1.45576	-40.2173	2.5518e-157	2.20592e-156	349.002
NUP133	1.26743	2.45327	40.2165	2.57168e-157	2.22185e-156	348.994
PPP2R2A	-1.30138	3.69882	-40.2112	2.70147e-157	2.33266e-156	348.945
AMMECR1L	1.06386	1.94204	40.2047	2.87142e-157	2.478e-156	348.884
PEBP1	2.68799	4.61754	40.1962	3.10892e-157	2.68144e-156	348.805
BTBD1	1.61266	3.03926	40.1894	3.31297e-157	2.85582e-156	348.741
PPRC1	2.10594	3.01997	40.1878	3.36466e-157	2.89874e-156	348.726
TTC3	2.40973	3.08195	40.178	3.68801e-157	3.17552e-156	348.634
PLCXD1	2.32644	2.90144	40.1751	3.78834e-157	3.26007e-156	348.607
MFSD1P1	1.67014	0.653302	40.1749	3.79665e-157	3.26537e-156	348.605
MT-ND1	2.67753	10.5707	40.1593	4.39203e-157	3.77532e-156	348.459
EIF2S2P3	1.9854	0.912188	40.1562	4.5217e-157	3.88459e-156	348.43
GAPDHP39	1.66826	0.585392	40.1526	4.67565e-157	4.01459e-156	348.396
HMGA1P2	1.66101	0.834141	40.1368	5.42043e-157	4.65144e-156	348.248
DCK	2.47427	3.22788	40.1353	5.49822e-157	4.71554e-156	348.234
RNU1-28P	-3.69489	2.61452	-40.1319	5.67487e-157	4.86431e-156	348.202
GRAP2	-2.72141	2.95076	-40.1263	5.9837e-157	5.12615e-156	348.149
HTRA2	-1.54649	3.49079	-40.1145	6.68353e-157	5.72246e-156	348.039
HPRT1	2.17342	3.50305	40.1132	6.76216e-157	5.78654e-156	348.027
PRPF19	1.87842	4.33571	40.0829	8.97988e-157	7.67999e-156	347.743
SUZ12P1	1.83664	2.47916	40.0652	1.0606e-156	9.06564e-156	347.577
GNPAT	1.65316	3.57353	40.0619	1.09427e-156	9.3482e-156	347.545
NFS1	-1.2602	2.36783	-40.0596	1.11782e-156	9.54406e-156	347.524
ZNF367	1.79723	1.07804	40.0558	1.15802e-156	9.88174e-156	347.489
SIK2	1.18417	1.56375	40.0535	1.18383e-156	1.00963e-155	347.467
FAM3A	-1.74834	3.18105	-40.0348	1.41021e-156	1.20203e-155	347.291
PATZ1	1.66705	2.65731	40.0346	1.41335e-156	1.20403e-155	347.289
MDP1	-1.96188	1.72717	-40.0298	1.47802e-156	1.25842e-155	347.244
TOMM34	1.63488	2.67742	40.0249	1.54816e-156	1.3174e-155	347.198
NQO2	-4.02524	4.33624	-40.0208	1.60857e-156	1.36804e-155	347.16
DNAJC25-GNG10	-3.44687	2.38111	-40.0087	1.80211e-156	1.5318e-155	347.046
DCTN2	-1.35078	4.99247	-40.0028	1.9043e-156	1.61775e-155	346.991
YWHAB	1.78452	6.34341	40.0011	1.93422e-156	1.64225e-155	346.975
SLC15A4	-2.42155	4.15925	-39.9777	2.41001e-156	2.04509e-155	346.755
RPS3AP20	1.91223	0.948134	39.9366	3.5456e-156	3.00706e-155	346.369
LINC00852	1.73057	1.63864	39.9234	4.01301e-156	3.40158e-155	346.245
TMEM9B-AS1	1.76677	1.27174	39.9141	4.37628e-156	3.70744e-155	346.158
BLOC1S1	-3.20792	5.36501	-39.8857	5.71533e-156	4.83915e-155	345.891
RNU6-310P	1.86179	0.576446	39.8813	5.9582e-156	5.04199e-155	345.849
SLC19A1	-2.86777	3.65273	-39.8754	6.29761e-156	5.32625e-155	345.794
CHI3L2	-2.15175	1.76823	-39.8716	6.52981e-156	5.51958e-155	345.758
GSE1	3.03335	2.91023	39.8643	6.9875e-156	5.90318e-155	345.69
CYB561A3	-1.93306	3.22408	-39.8639	7.01917e-156	5.92665e-155	345.685
ZDHHC3	-1.75069	4.23968	-39.8593	7.32927e-156	6.18506e-155	345.642
ITGB1BP1	-1.74415	3.30743	-39.859	7.35014e-156	6.19924e-155	345.639
RNU6-1237P	1.74182	0.539326	39.8447	8.40803e-156	7.08756e-155	345.505
KPNA2P3	-2.73784	1.89068	-39.843	8.53929e-156	7.19424e-155	345.489
ZNF551	1.63124	1.15622	39.8278	9.8493e-156	8.29331e-155	345.346
MIR548K	1.73346	0.548485	39.8244	1.0173e-155	8.56119e-155	345.314
RAB3IP	-1.76844	1.8867	-39.8231	1.02958e-155	8.65971e-155	345.302
EFCAB14	1.41449	3.83327	39.8176	1.08398e-155	9.11227e-155	345.25
RUFY1-AS1	1.26235	0.625766	39.8147	1.11407e-155	9.36e-155	345.223
RBP7	-3.49515	2.84286	-39.7999	1.28139e-155	1.07598e-154	345.083
MIR378H	2.43423	0.753575	39.7938	1.35681e-155	1.13869e-154	345.026
FIRRE	2.02132	0.737661	39.7912	1.38944e-155	1.16543e-154	345.002
STX4	-1.97123	4.75396	-39.785	1.47291e-155	1.23476e-154	344.944
SMIM7	-1.1939	3.59794	-39.7827	1.50524e-155	1.26117e-154	344.922
RAB5CP1	1.36762	0.500437	39.7798	1.54771e-155	1.29605e-154	344.894
HCAR2	-4.62267	3.88527	-39.7575	1.90893e-155	1.59765e-154	344.684
EIF1AX	2.00965	2.89349	39.7562	1.93248e-155	1.61648e-154	344.672
ABRAXAS2	1.44281	2.19273	39.7494	2.06051e-155	1.72262e-154	344.608
CS	1.34356	4.71762	39.7489	2.07007e-155	1.72967e-154	344.603
SNORD11B	2.1959	0.679828	39.7412	2.22551e-155	1.85853e-154	344.531
CCT2	2.29712	4.16285	39.7193	2.73456e-155	2.28239e-154	344.324
EPDR1	2.52501	1.50003	39.7149	2.85153e-155	2.37872e-154	344.282
TDGF1P6	1.70078	0.595888	39.6829	3.85335e-155	3.21267e-154	343.981
GNGT2	-2.45796	2.08407	-39.6793	3.98643e-155	3.3218e-154	343.947
SGSH	-2.99917	3.43102	-39.6656	4.53393e-155	3.77596e-154	343.818
CICP14	2.3791	2.23551	39.6617	4.7062e-155	3.91729e-154	343.781
PSD	-1.21121	1.10992	-39.6613	4.72152e-155	3.9279e-154	343.778
PFKFB4	-3.25136	3.70686	-39.6606	4.7554e-155	3.95393e-154	343.771
SNORD51	1.65951	0.513857	39.6363	5.97738e-155	4.96725e-154	343.542
BRCC3	1.47423	1.95897	39.6297	6.36033e-155	5.28261e-154	343.48
CYB5R1	-2.21723	3.59533	-39.6111	7.58571e-155	6.29693e-154	343.303
RNU6-450P	1.62685	0.503749	39.6052	8.01992e-155	6.65374e-154	343.248
RANBP6	1.93713	1.83485	39.5979	8.58765e-155	7.12089e-154	343.179
PRSS57	5.67893	3.65091	39.5915	9.11887e-155	7.55726e-154	343.119
DNAAF2	1.52107	1.24276	39.5883	9.4025e-155	7.78809e-154	343.088
BCL2L2	1.17473	1.77488	39.5873	9.48987e-155	7.85619e-154	343.079
MAP2K2	-1.86497	5.50473	-39.5701	1.11668e-154	9.23943e-154	342.916
TAF9	1.78016	3.53524	39.5697	1.12042e-154	9.2653e-154	342.913
MME	-3.81821	2.8526	-39.5631	1.19207e-154	9.85251e-154	342.851
COMMD9	-1.91381	3.87832	-39.5626	1.19794e-154	9.89567e-154	342.846
MIR601	1.85375	0.573958	39.5596	1.23213e-154	1.01726e-153	342.818
HPCAL1	-2.21249	4.77057	-39.5473	1.38484e-154	1.14271e-153	342.701
TMEM86B	-2.5225	2.92366	-39.5451	1.41381e-154	1.16599e-153	342.68
C19orf25	-1.96242	2.86342	-39.5419	1.45641e-154	1.20048e-153	342.651
RABAC1	-2.95647	5.52606	-39.5311	1.61288e-154	1.32873e-153	342.548
POLR2J4	-1.11081	1.83408	-39.5284	1.655e-154	1.36269e-153	342.523
TAF2	1.48417	2.20857	39.5236	1.73128e-154	1.42473e-153	342.478
BTNL8	-3.4293	2.43147	-39.523	1.74152e-154	1.43239e-153	342.472
MTCO1P12	4.99204	4.63734	39.5125	1.92312e-154	1.5809e-153	342.372
ANKRD61	1.09342	0.61302	39.5062	2.04103e-154	1.67692e-153	342.313
TMEM183B	-1.88357	1.6199	-39.4987	2.19007e-154	1.7984e-153	342.242
ATF2	1.60773	2.77453	39.497	2.22592e-154	1.82686e-153	342.226
ARID5A	-2.79228	5.33655	-39.4871	2.44467e-154	2.00532e-153	342.132
NRBF2P5	1.70629	0.848069	39.4784	2.65312e-154	2.17513e-153	342.05
SRA1	-1.87928	4.29914	-39.4642	3.03467e-154	2.4866e-153	341.916
PPP1R3B	-2.99282	3.03304	-39.4621	3.09448e-154	2.53425e-153	341.896
SS18	1.33823	3.02158	39.4584	3.20519e-154	2.62351e-153	341.861
TMX1	2.33423	2.85466	39.4488	3.50842e-154	2.87017e-153	341.771
TUT1	-1.25932	2.13424	-39.4416	3.7554e-154	3.07057e-153	341.703
RPS6P25	1.49353	0.92518	39.4377	3.89898e-154	3.18625e-153	341.665
ZBTB33	1.96398	1.97177	39.4306	4.16772e-154	3.40405e-153	341.598
PPP2R3B	-1.8487	2.59494	-39.4217	4.53304e-154	3.70045e-153	341.514
CXCR5	-2.0491	1.46109	-39.4207	4.5789e-154	3.73589e-153	341.504
FCGR2A	-4.90212	6.27071	-39.4011	5.50798e-154	4.49151e-153	341.319
TRGJP1	4.63374	1.43416	39.3893	6.16316e-154	5.02309e-153	341.207
ARID1B	2.03181	2.7319	39.3803	6.71101e-154	5.46668e-153	341.122
PDCD11	1.71229	2.5501	39.3784	6.83029e-154	5.56087e-153	341.104
HMGN1P1	1.4818	0.563338	39.3727	7.2107e-154	5.86745e-153	341.05
TGIF2	2.03611	2.72599	39.3638	7.84145e-154	6.37729e-153	340.966
MIR5695	2.30778	0.714449	39.3611	8.04727e-154	6.54119e-153	340.94
MCM4	3.01329	2.89547	39.3564	8.41029e-154	6.83263e-153	340.896
SNORD1B	1.65958	0.513878	39.3521	8.76159e-154	7.11424e-153	340.855
PDE4DIPP6	2.52373	1.43645	39.3471	9.18311e-154	7.45254e-153	340.808
AKT2	-1.65912	4.4887	-39.3406	9.76958e-154	7.92428e-153	340.746
ZNF37A	1.31366	1.34418	39.3167	1.22403e-153	9.92301e-153	340.52
CELF6	-0.986212	0.768613	-39.3114	1.2878e-153	1.04344e-152	340.469
ATP6V1G1	1.75188	5.12361	39.31	1.30479e-153	1.05665e-152	340.456
CKAP5	2.07124	2.95416	39.3013	1.41721e-153	1.14708e-152	340.374
MCCC1	1.40355	2.35097	39.2962	1.48751e-153	1.20334e-152	340.325
ZNF836	-1.3057	1.69889	-39.2882	1.60343e-153	1.29644e-152	340.25
ST20-MTHFS	-2.20504	1.5341	-39.2717	1.8752e-153	1.51537e-152	340.093
NF2	1.07204	2.00294	39.2691	1.92291e-153	1.5531e-152	340.068
RAVER2	2.19086	1.30954	39.2665	1.97089e-153	1.59101e-152	340.043
MTCP1	-1.49049	1.41802	-39.2608	2.08005e-153	1.67824e-152	339.99
PRDX3P2	1.47812	0.506442	39.2581	2.13378e-153	1.72068e-152	339.964
CCDC14	2.21872	2.26437	39.2553	2.1897e-153	1.76484e-152	339.938
MUS81	-1.56595	3.8012	-39.252	2.26057e-153	1.82099e-152	339.906
IPO5	1.9007	3.14914	39.25	2.30244e-153	1.85374e-152	339.888
USF2	-1.49444	5.72204	-39.2463	2.38476e-153	1.91901e-152	339.853
ATG9A	-2.12095	4.02481	-39.2404	2.522e-153	2.02837e-152	339.797
BCOR	1.70041	2.06021	39.2401	2.53059e-153	2.03421e-152	339.793
GNAL	-1.09945	0.996256	-39.2384	2.57068e-153	2.06535e-152	339.778
POLR1B	1.47206	1.71934	39.2275	2.85197e-153	2.29014e-152	339.674
RAB11FIP1P1	2.32404	1.98553	39.2245	2.93259e-153	2.35363e-152	339.646
MARCHF2	-2.74565	4.78067	-39.2231	2.97369e-153	2.38536e-152	339.632
PLCG2	-1.7978	4.55064	-39.2206	3.04322e-153	2.43985e-152	339.609
ANKRD28	3.22072	2.9211	39.2099	3.36991e-153	2.70035e-152	339.507
PSTPIP1	-3.16456	5.35494	-39.2085	3.41515e-153	2.73517e-152	339.493
CA4	-4.81212	3.42376	-39.1775	4.57803e-153	3.66458e-152	339.2
DLAT	1.37703	1.89043	39.1703	4.90443e-153	3.9238e-152	339.131
LPAR2	-3.19792	5.68747	-39.1664	5.0907e-153	4.07069e-152	339.094
CERKL	2.77009	3.02843	39.1614	5.33385e-153	4.26289e-152	339.047
MTND4LP30	2.91799	0.954653	39.1596	5.42542e-153	4.3338e-152	339.03
EMC3-AS1	1.57352	1.25577	39.1463	6.15879e-153	4.91704e-152	338.903
TRIM73	-1.20349	0.996703	-39.1455	6.20517e-153	4.95148e-152	338.896
KMT2A	2.67426	2.73101	39.1452	6.22153e-153	4.96193e-152	338.893
ITPRIP	-2.38044	4.26744	-39.1331	6.97866e-153	5.56286e-152	338.778
PSMC1P1	-2.39915	1.96813	-39.121	7.82728e-153	6.23606e-152	338.663
DGKA	-2.56201	4.79604	-39.118	8.05912e-153	6.41741e-152	338.634
SNAP47	-1.36889	2.17543	-39.106	9.02501e-153	7.18279e-152	338.521
BRMS1	-1.69021	4.0369	-39.1029	9.29862e-153	7.3967e-152	338.491
RNU6-1005P	2.49767	0.773204	39.076	1.19999e-152	9.54045e-152	338.236
NCF1B	-4.35589	4.56082	-39.0674	1.30213e-152	1.03471e-151	338.154
SH3BP2	-2.45535	5.58104	-39.0531	1.49157e-152	1.18464e-151	338.018
RNU1-4	-3.75466	2.62219	-39.0247	1.95478e-152	1.55172e-151	337.747
SF3B2	-1.36026	5.28344	-39.0046	2.36546e-152	1.87674e-151	337.557
TSPAN31	-1.22056	2.84211	-38.9969	2.54449e-152	2.01773e-151	337.484
TRADD	-1.81389	3.31601	-38.9942	2.61025e-152	2.0688e-151	337.458
WASHC5	1.68447	3.14929	38.9865	2.80855e-152	2.22481e-151	337.385
FUBP3	1.2007	2.24755	38.9783	3.03867e-152	2.40585e-151	337.306
CD177	-6.87232	4.93635	-38.9726	3.20568e-152	2.53676e-151	337.252
TSPYL4	1.81944	2.11359	38.9681	3.34616e-152	2.64656e-151	337.209
MIR548AQ	3.23024	0.999881	38.9589	3.6516e-152	2.88664e-151	337.122
ARHGAP26	-2.97373	4.42066	-38.9559	3.75993e-152	2.97073e-151	337.093
ATP6V0E1P1	2.44407	0.810535	38.9536	3.84231e-152	3.03425e-151	337.071
NCL	2.36633	5.76434	38.9462	4.12093e-152	3.25259e-151	337.001
CDC23	1.35233	2.16777	38.937	4.49948e-152	3.54954e-151	336.913
OAZ2	-2.38005	5.06899	-38.9351	4.58211e-152	3.61285e-151	336.895
ZNF775	-1.96186	2.55253	-38.9323	4.70455e-152	3.70748e-151	336.868
RN7SL431P	2.78095	1.38616	38.9279	4.90811e-152	3.86589e-151	336.826
LSM10	-1.98253	4.44141	-38.925	5.04347e-152	3.97046e-151	336.799
GGT1	-2.87567	3.36197	-38.9235	5.11493e-152	4.02464e-151	336.785
STX16-NPEPL1	-2.38066	2.39492	-38.9228	5.14967e-152	4.04989e-151	336.778
DENND6A-AS1	1.39553	0.570134	38.9107	5.77882e-152	4.54233e-151	336.663
PDXK	-2.23621	3.9598	-38.9065	6.01787e-152	4.72779e-151	336.622
JPT2	1.53052	2.41827	38.8424	1.10724e-151	8.69431e-151	336.012
BACH1-IT1	2.02539	1.13361	38.8419	1.11308e-151	8.73564e-151	336.007
DMWD	-1.91228	1.94819	-38.8417	1.11491e-151	8.7455e-151	336.005
LAMTOR4	-2.35331	5.89767	-38.7965	1.7153e-151	1.34481e-150	335.574
RUNX2	2.62677	2.55548	38.7949	1.74234e-151	1.36531e-150	335.558
LMNB2	1.88255	2.63629	38.7867	1.88344e-151	1.47512e-150	335.48
NPIPB13	-1.38836	1.10934	-38.7751	2.10431e-151	1.64726e-150	335.369
SH2B3	2.23939	3.63306	38.7721	2.1655e-151	1.69429e-150	335.341
CCDC6	1.67603	2.21413	38.7612	2.40134e-151	1.87785e-150	335.237
R3HDM1	1.35223	2.54773	38.7594	2.44426e-151	1.91043e-150	335.219
MT-ND6	2.88577	9.31141	38.7551	2.54491e-151	1.98808e-150	335.179
RNU1-27P	-3.72986	2.62987	-38.7545	2.56011e-151	1.99893e-150	335.173
DESI2	1.17553	2.14275	38.7526	2.60812e-151	2.03538e-150	335.155
ZHX1	1.56075	1.72687	38.7417	2.89296e-151	2.25651e-150	335.051
STIMATE-MUSTN1	-2.08291	1.86283	-38.7284	3.28496e-151	2.56096e-150	334.924
KAT5	-1.34831	4.02516	-38.7194	3.57842e-151	2.78831e-150	334.838
PIGP	-1.23663	1.57478	-38.7107	3.88918e-151	3.02891e-150	334.755
BCLAF1	1.83192	4.02795	38.7	4.30651e-151	3.35222e-150	334.653
UBA2	1.84896	3.71523	38.6987	4.36121e-151	3.39306e-150	334.64
SLC15A2	2.59115	2.32842	38.6939	4.56551e-151	3.5502e-150	334.594
RPL5P30	1.26761	0.707453	38.6805	5.18963e-151	4.03347e-150	334.466
MBD5	-1.72941	2.15527	-38.6775	5.34027e-151	4.14844e-150	334.437
C22orf39	-0.923764	2.78552	-38.6714	5.65781e-151	4.39287e-150	334.38
NUP54	1.47475	2.55012	38.66	6.3084e-151	4.89551e-150	334.271
THUMPD1	2.22213	2.50942	38.6438	7.36747e-151	5.71447e-150	334.115
MLANA	1.22378	0.632113	38.6335	8.12747e-151	6.30076e-150	334.017
CDCA7	3.58738	1.99471	38.6321	8.2331e-151	6.3794e-150	334.004
RNU6-597P	1.67575	0.518883	38.614	9.79005e-151	7.58194e-150	333.831
FOXRED2	1.66007	1.0937	38.6065	1.05179e-150	8.14149e-150	333.759
TNIP1	-1.72595	5.84356	-38.6062	1.05471e-150	8.15999e-150	333.756
MIR7848	2.67123	0.826909	38.606	1.05663e-150	8.17063e-150	333.754
MIR3128	2.16623	0.67065	38.5984	1.13607e-150	8.78047e-150	333.682
IMMT	1.46398	4.09768	38.5826	1.32179e-150	1.02107e-149	333.53
PPAN	-1.95255	2.68396	-38.5776	1.38695e-150	1.07086e-149	333.482
PLGLB1	-1.70918	1.31932	-38.5721	1.461e-150	1.12747e-149	333.43
HMGN4	1.69365	4.31662	38.5691	1.50328e-150	1.15951e-149	333.402
RBM12	1.54798	3.07878	38.5627	1.59841e-150	1.23227e-149	333.34
PNPT1	1.46765	1.64461	38.5592	1.65349e-150	1.27408e-149	333.306
GFPT1	1.1874	1.56052	38.5587	1.66036e-150	1.27873e-149	333.302
EGR1	5.63012	3.59265	38.5486	1.82961e-150	1.40836e-149	333.205
TRMT13	1.79874	1.71711	38.5378	2.02923e-150	1.56124e-149	333.101
LIMS2	-1.81639	1.36769	-38.5353	2.07771e-150	1.59773e-149	333.078
RRN3	1.66825	2.20359	38.5306	2.17263e-150	1.66988e-149	333.033
PPAT	1.39554	1.12141	38.5249	2.2946e-150	1.76274e-149	332.978
UBE3A	1.69544	2.33636	38.5218	2.3647e-150	1.81567e-149	332.948
CALU	1.88701	2.8825	38.5094	2.66195e-150	2.04288e-149	332.83
GPR137	-1.88569	3.17212	-38.5018	2.86298e-150	2.19606e-149	332.757
PPP1R7	-1.37712	4.11987	-38.4946	3.06614e-150	2.35071e-149	332.688
NCOA4	2.91317	6.26654	38.4871	3.2949e-150	2.52482e-149	332.616
HACD3	1.67895	1.99088	38.484	3.39438e-150	2.59975e-149	332.587
BOLA2P2	1.39708	0.66016	38.4556	4.45326e-150	3.40902e-149	332.315
PPP2R2D	-1.11496	3.07904	-38.4489	4.75222e-150	3.63606e-149	332.25
HLA-S	1.76554	0.546666	38.4482	4.78088e-150	3.65615e-149	332.244
NUP188	2.02488	3.16168	38.44	5.17442e-150	3.95512e-149	332.165
ETAA1	1.27705	1.11562	38.4291	5.74237e-150	4.38704e-149	332.06
EIF3F	-1.77864	5.53835	-38.424	6.02814e-150	4.60306e-149	332.012
RNU6-1322P	1.94183	0.601213	38.422	6.14457e-150	4.68962e-149	331.993
[truncated: 13,251 more rows]
