# Supplementary material for: Novel Prognostic Signature for Acute Myeloid Leukemia: Bioinformatics Analysis of Combined CNV-Driven and Ferroptosis-Related Genes
Source: Front Genet. 2022 Apr 26;13:849437. doi: 10.3389/fgene.2022.849437 (PMC9086455; doi:10.3389/fgene.2022.849437)
Supplement: Supplementary file 10 [file Table1.xlsx]

## Sheet: uniCox
Table 1. Univariate Cox analysis.
	HR	HR.95L	HR.95H	p-value
Age	1.03482	1.01883	1.05107	1.66026e-05
Gender	0.962367	0.619558	1.49486	0.864443
Risk score	2.55282	1.70387	3.82475	5.53512e-06
