# Supplementary material for: Novel Prognostic Signature for Acute Myeloid Leukemia: Bioinformatics Analysis of Combined CNV-Driven and Ferroptosis-Related Genes
Source: Front Genet. 2022 Apr 26;13:849437. doi: 10.3389/fgene.2022.849437 (PMC9086455; doi:10.3389/fgene.2022.849437)
Supplement: Supplementary file 11 [file Table10.xlsx]

## Sheet: sheet 1
Supplementary Table 8. Upregulated in AML with increased CNV.
HSPE1P27
KPNA6
CEP85
BRCA1P1
ANKRD40
MTDH
CPT1A
GANAB
MIR548AA1
OSBP
KIAA0100
ATAD2
INTS2
MRPL45
MRTFA-AS1
AGPAT5
ACBD3
CSPP1
MIR548L
MIR3671
MRE11
DUTP2
LUC7L3
MIR326
CRKL
DPY19L4
CMPK1
EI24
LTN1
LRRC8D
CWF19L2
ACTG1P20
DCK
MCM4
DLAT
KMT2A
FOXRED2
NDUFAF2P2
HP1BP3
LINC00674
MIR4762
FEN1
DDX17
MFSD14A
CENATAC-DT
BPTF
FAM111A
EIF3D
GART
DSCC1
DEPTOR
CAT
NOL11
ATL3
EIF3I
OTUD6B
LRRC37A16P
MED13
MIS18A
APOBEC3C
HMGXB4
ATF4
CLNS1A
KPNA2
LMO2
BRIP1
NEU3
LRRC59
MIR1249
MRPL15
MTREX
LRRCC1
ERG
MTMR2
HSPA13
DDX5
NBR2
DCAKD
NUDCD1
AKAP1
EIF4G3
DYRK1A
AGO1
CELF2-AS1
PAQR7
BAG4
FAM222B
C2CD2
HMBOX1
CDC45
LRP8
NIPAL2
PKN2
EFR3A
NRIP1
BRCA1
NOCT
HPS4
ARRB1
FAM168A
PHF5A
PCM1
HMGN1
MORC3
MCM5
AK2
NLK
MIR155HG
CHEK1
KIF2C
ABHD15
NBN
MYO18A
HYOU1
LPO
LRFN4
ADGRA2
ARTN
EIF4EBP1
KBTBD11
MMRN1
LINC02573
MN1
ATP5MFP4
MDK
CITED4
ADA2
