# Supplementary material for: Novel Prognostic Signature for Acute Myeloid Leukemia: Bioinformatics Analysis of Combined CNV-Driven and Ferroptosis-Related Genes
Source: Front Genet. 2022 Apr 26;13:849437. doi: 10.3389/fgene.2022.849437 (PMC9086455; doi:10.3389/fgene.2022.849437)
Supplement: Supplementary file 12 [file Table12.xlsx]

## Sheet: go
Supplementary Table 10. GO analysis.
ONTOLOGY	ID	Description	GeneRatio	BgRatio	pvalue	p.adjust	qvalue	geneID	Count
BP	GO:1900408	negative regulation of cellular response to oxidative stress	2021-02-06	58/18866	0.000138235	0.0178066	0.00804788	3315/468	2
BP	GO:1903202	negative regulation of oxidative stress-induced cell death	2021-02-06	58/18866	0.000138235	0.0178066	0.00804788	3315/468	2
BP	GO:1902883	negative regulation of response to oxidative stress	2021-02-06	60/18866	0.000147977	0.0178066	0.00804788	3315/468	2
BP	GO:1903201	regulation of oxidative stress-induced cell death	2021-02-06	77/18866	0.000244034	0.0185474	0.00838268	3315/468	2
BP	GO:0006446	regulation of translational initiation	2021-02-06	79/18866	0.000256889	0.0185474	0.00838268	3315/468	2
BP	GO:1900407	regulation of cellular response to oxidative stress	2021-02-06	92/18866	0.00034838	0.0189412	0.0085607	3315/468	2
BP	GO:0036473	cell death in response to oxidative stress	2021-02-06	97/18866	0.000387221	0.0189412	0.0085607	3315/468	2
BP	GO:1902882	regulation of response to oxidative stress	2021-02-06	101/18866	0.00041975	0.0189412	0.0085607	3315/468	2
BP	GO:0006986	response to unfolded protein	2021-02-06	183/18866	0.00136818	0.0401195	0.0181324	3315/468	2
BP	GO:0006413	translational initiation	2021-02-06	192/18866	0.00150452	0.0401195	0.0181324	3315/468	2
BP	GO:0035966	response to topologically incorrect protein	2021-02-06	205/18866	0.00171257	0.0401195	0.0181324	3315/468	2
BP	GO:0045766	positive regulation of angiogenesis	2021-02-06	208/18866	0.00176243	0.0401195	0.0181324	92140/3315	2
BP	GO:0006457	protein folding	2021-02-06	230/18866	0.00214924	0.0401195	0.0181324	10049/3315	2
BP	GO:1904018	positive regulation of vasculature development	2021-02-06	235/18866	0.00224231	0.0401195	0.0181324	92140/3315	2
BP	GO:0043122	regulation of I-kappaB kinase/NF-kappaB signaling	2021-02-06	252/18866	0.00257299	0.0401195	0.0181324	92140/3315	2
BP	GO:0090649	response to oxygen-glucose deprivation	2021-01-06	10/18866	0.00317653	0.0401195	0.0181324	468	1
BP	GO:0007249	I-kappaB kinase/NF-kappaB signaling	2021-02-06	286/18866	0.0032997	0.0401195	0.0181324	92140/3315	2
BP	GO:0097193	intrinsic apoptotic signaling pathway	2021-02-06	290/18866	0.00339088	0.0401195	0.0181324	3315/468	2
BP	GO:0042789	mRNA transcription by RNA polymerase II	2021-01-06	11/18866	0.00349372	0.0401195	0.0181324	468	1
BP	GO:0043619	regulation of transcription from RNA polymerase II promoter in response to oxidative stress	2021-01-06	11/18866	0.00349372	0.0401195	0.0181324	468	1
BP	GO:0090084	negative regulation of inclusion body assembly	2021-01-06	11/18866	0.00349372	0.0401195	0.0181324	10049	1
BP	GO:1905383	protein localization to presynapse	2021-01-06	11/18866	0.00349372	0.0401195	0.0181324	3315	1
BP	GO:1990440	positive regulation of transcription from RNA polymerase II promoter in response to endoplasmic reticulum stress	2021-01-06	11/18866	0.00349372	0.0401195	0.0181324	468	1
BP	GO:1905461	positive regulation of vascular associated smooth muscle cell apoptotic process	2021-01-06	12/18866	0.00381083	0.0401195	0.0181324	468	1
BP	GO:0034599	cellular response to oxidative stress	2021-02-06	310/18866	0.00386456	0.0401195	0.0181324	3315/468	2
BP	GO:0071287	cellular response to manganese ion	2021-01-06	13/18866	0.00412785	0.0401195	0.0181324	468	1
BP	GO:0099640	axo-dendritic protein transport	2021-01-06	13/18866	0.00412785	0.0401195	0.0181324	3315	1
BP	GO:0010889	regulation of sequestering of triglyceride	2021-01-06	14/18866	0.00444479	0.0401195	0.0181324	123	1
BP	GO:0035358	regulation of peroxisome proliferator activated receptor signaling pathway	2021-01-06	14/18866	0.00444479	0.0401195	0.0181324	247	1
BP	GO:0043558	regulation of translational initiation in response to stress	2021-01-06	14/18866	0.00444479	0.0401195	0.0181324	468	1
BP	GO:0070307	lens fiber cell development	2021-01-06	14/18866	0.00444479	0.0401195	0.0181324	468	1
BP	GO:2001028	positive regulation of endothelial cell chemotaxis	2021-01-06	15/18866	0.00476164	0.0401195	0.0181324	3315	1
BP	GO:0010506	regulation of autophagy	2021-02-06	347/18866	0.00481834	0.0401195	0.0181324	92140/3315	2
BP	GO:0019372	lipoxygenase pathway	2021-01-06	16/18866	0.00507841	0.0401195	0.0181324	247	1
BP	GO:0090083	regulation of inclusion body assembly	2021-01-06	16/18866	0.00507841	0.0401195	0.0181324	10049	1
BP	GO:0062197	cellular response to chemical stress	2021-02-06	360/18866	0.00517708	0.0401195	0.0181324	3315/468	2
BP	GO:0009299	mRNA transcription	2021-01-06	17/18866	0.0053951	0.0401195	0.0181324	468	1
BP	GO:0030730	sequestering of triglyceride	2021-01-06	17/18866	0.0053951	0.0401195	0.0181324	123	1
BP	GO:0010744	positive regulation of macrophage derived foam cell differentiation	2021-01-06	19/18866	0.00602822	0.0401195	0.0181324	247	1
BP	GO:0034393	positive regulation of smooth muscle cell apoptotic process	2021-01-06	19/18866	0.00602822	0.0401195	0.0181324	468	1
BP	GO:0045947	negative regulation of translational initiation	2021-01-06	19/18866	0.00602822	0.0401195	0.0181324	468	1
BP	GO:1902176	negative regulation of oxidative stress-induced intrinsic apoptotic signaling pathway	2021-01-06	19/18866	0.00602822	0.0401195	0.0181324	3315	1
BP	GO:1905288	vascular associated smooth muscle cell apoptotic process	2021-01-06	19/18866	0.00602822	0.0401195	0.0181324	468	1
BP	GO:1905459	regulation of vascular associated smooth muscle cell apoptotic process	2021-01-06	19/18866	0.00602822	0.0401195	0.0181324	468	1
BP	GO:0010042	response to manganese ion	2021-01-06	20/18866	0.00634465	0.0401195	0.0181324	468	1
BP	GO:0043555	regulation of translation in response to stress	2021-01-06	20/18866	0.00634465	0.0401195	0.0181324	468	1
BP	GO:0045618	positive regulation of keratinocyte differentiation	2021-01-06	20/18866	0.00634465	0.0401195	0.0181324	247	1
BP	GO:0071243	cellular response to arsenic-containing substance	2021-01-06	20/18866	0.00634465	0.0401195	0.0181324	468	1
BP	GO:0045765	regulation of angiogenesis	2021-02-06	403/18866	0.00644996	0.0401195	0.0181324	92140/3315	2
BP	GO:0035357	peroxisome proliferator activated receptor signaling pathway	2021-01-06	21/18866	0.006661	0.0401195	0.0181324	247	1
BP	GO:0036499	PERK-mediated unfolded protein response	2021-01-06	21/18866	0.006661	0.0401195	0.0181324	468	1
BP	GO:0043651	linoleic acid metabolic process	2021-01-06	21/18866	0.006661	0.0401195	0.0181324	247	1
BP	GO:0045943	positive regulation of transcription by RNA polymerase I	2021-01-06	21/18866	0.006661	0.0401195	0.0181324	468	1
BP	GO:0060713	labyrinthine layer morphogenesis	2021-01-06	21/18866	0.006661	0.0401195	0.0181324	10049	1
BP	GO:0140467	integrated stress response signaling	2021-01-06	21/18866	0.006661	0.0401195	0.0181324	468	1
BP	GO:1903204	negative regulation of oxidative stress-induced neuron death	2021-01-06	21/18866	0.006661	0.0401195	0.0181324	468	1
BP	GO:0002089	lens morphogenesis in camera-type eye	2021-01-06	22/18866	0.00697727	0.0401195	0.0181324	468	1
BP	GO:0035162	embryonic hemopoiesis	2021-01-06	23/18866	0.00729345	0.0401195	0.0181324	468	1
BP	GO:1901522	positive regulation of transcription from RNA polymerase II promoter involved in cellular response to chemical stimulus	2021-01-06	23/18866	0.00729345	0.0401195	0.0181324	468	1
BP	GO:0036003	positive regulation of transcription from RNA polymerase II promoter in response to stress	2021-01-06	24/18866	0.00760955	0.0401195	0.0181324	468	1
BP	GO:0070841	inclusion body assembly	2021-01-06	24/18866	0.00760955	0.0401195	0.0181324	10049	1
BP	GO:0048608	reproductive structure development	2021-02-06	443/18866	0.00775128	0.0401195	0.0181324	247/10049	2
BP	GO:1901342	regulation of vasculature development	2021-02-06	444/18866	0.00778524	0.0401195	0.0181324	92140/3315	2
BP	GO:0001819	positive regulation of cytokine production	2021-02-06	447/18866	0.00788754	0.0401195	0.0181324	3315/468	2
BP	GO:0061458	reproductive system development	2021-02-06	447/18866	0.00788754	0.0401195	0.0181324	247/10049	2
BP	GO:0045109	intermediate filament organization	2021-01-06	25/18866	0.00792556	0.0401195	0.0181324	10049	1
BP	GO:0060669	embryonic placenta morphogenesis	2021-01-06	25/18866	0.00792556	0.0401195	0.0181324	10049	1
BP	GO:2001026	regulation of endothelial cell chemotaxis	2021-01-06	25/18866	0.00792556	0.0401195	0.0181324	3315	1
BP	GO:0006417	regulation of translation	2021-02-06	450/18866	0.00799047	0.0401195	0.0181324	3315/468	2
BP	GO:0048568	embryonic organ development	2021-02-06	451/18866	0.00802491	0.0401195	0.0181324	10049/468	2
BP	GO:0010884	positive regulation of lipid storage	2021-01-06	26/18866	0.0082415	0.0401195	0.0181324	123	1
BP	GO:0060706	cell differentiation involved in embryonic placenta development	2021-01-06	26/18866	0.0082415	0.0401195	0.0181324	10049	1
BP	GO:0006979	response to oxidative stress	2021-02-06	458/18866	0.00826797	0.0401195	0.0181324	3315/468	2
BP	GO:0006817	phosphate ion transport	2021-01-06	27/18866	0.00855734	0.0401195	0.0181324	468	1
BP	GO:0007214	gamma-aminobutyric acid signaling pathway	2021-01-06	27/18866	0.00855734	0.0401195	0.0181324	468	1
BP	GO:1902175	regulation of oxidative stress-induced intrinsic apoptotic signaling pathway	2021-01-06	27/18866	0.00855734	0.0401195	0.0181324	3315	1
BP	GO:1903203	regulation of oxidative stress-induced neuron death	2021-01-06	27/18866	0.00855734	0.0401195	0.0181324	468	1
BP	GO:0010575	positive regulation of vascular endothelial growth factor production	2021-01-06	28/18866	0.0088731	0.0405467	0.0183255	468	1
BP	GO:0045606	positive regulation of epidermal cell differentiation	2021-01-06	28/18866	0.0088731	0.0405467	0.0183255	247	1
BP	GO:0036475	neuron death in response to oxidative stress	2021-01-06	30/18866	0.00950438	0.0428885	0.0193839	468	1
BP	GO:0006356	regulation of transcription by RNA polymerase I	2021-01-06	31/18866	0.00981989	0.0437652	0.0197802	468	1
BP	GO:0010743	regulation of macrophage derived foam cell differentiation	2021-01-06	32/18866	0.0101353	0.0440825	0.0199236	247	1
BP	GO:0035767	endothelial cell chemotaxis	2021-01-06	32/18866	0.0101353	0.0440825	0.0199236	3315	1
BP	GO:0120255	olefinic compound biosynthetic process	2021-01-06	33/18866	0.0104507	0.044913	0.0202989	247	1
BP	GO:0042759	long-chain fatty acid biosynthetic process	2021-01-06	34/18866	0.0107659	0.0449469	0.0203143	247	1
BP	GO:0046685	response to arsenic-containing substance	2021-01-06	34/18866	0.0107659	0.0449469	0.0203143	468	1
BP	GO:0034390	smooth muscle cell apoptotic process	2021-01-06	35/18866	0.0110811	0.0449469	0.0203143	468	1
BP	GO:0034391	regulation of smooth muscle cell apoptotic process	2021-01-06	35/18866	0.0110811	0.0449469	0.0203143	468	1
BP	GO:0070306	lens fiber cell differentiation	2021-01-06	35/18866	0.0110811	0.0449469	0.0203143	468	1
BP	GO:0010661	positive regulation of muscle cell apoptotic process	2021-01-06	38/18866	0.0120261	0.0471895	0.0213278	468	1
BP	GO:0010742	macrophage derived foam cell differentiation	2021-01-06	38/18866	0.0120261	0.0471895	0.0213278	247	1
BP	GO:0090077	foam cell differentiation	2021-01-06	38/18866	0.0120261	0.0471895	0.0213278	247	1
CC	GO:0030018	Z disc	2021-02-06	128/19559	0.000626559	0.0138532	0.00512352	10049/3315	2
CC	GO:0031674	I band	2021-02-06	140/19559	0.000748822	0.0138532	0.00512352	10049/3315	2
CC	GO:0030017	sarcomere	2021-02-06	207/19559	0.00162589	0.0158477	0.00586117	10049/3315	2
CC	GO:0030016	myofibril	2021-02-06	227/19559	0.00195073	0.0158477	0.00586117	10049/3315	2
CC	GO:0043292	contractile fiber	2021-02-06	238/19559	0.00214158	0.0158477	0.00586117	10049/3315	2
CC	GO:0005925	focal adhesion	2021-02-06	415/19559	0.00636653	0.0349247	0.0129167	247/3315	2
CC	GO:0030055	cell-substrate junction	2021-02-06	423/19559	0.00660738	0.0349247	0.0129167	247/3315	2
CC	GO:0005911	cell-cell junction	2021-02-06	493/19559	0.00889208	0.0411259	0.0152101	247/92140	2
MF	GO:0140297	DNA-binding transcription factor binding	2021-03-06	347/18352	0.000128482	0.0021097	0.000573093	92140/3315/468	3
MF	GO:0001085	RNA polymerase II transcription factor binding	2021-02-06	56/18352	0.00013611	0.0021097	0.000573093	92140/468	2
MF	GO:0061629	RNA polymerase II-specific DNA-binding transcription factor binding	2021-02-06	267/18352	0.00304344	0.0278337	0.00756093	92140/3315	2
MF	GO:0043522	leucine zipper domain binding	2021-01-06	11/18352	0.00359144	0.0278337	0.00756093	468	1
MF	GO:0030275	LRR domain binding	2021-01-06	17/18352	0.00554588	0.0284462	0.00772731	468	1
MF	GO:0001671	ATPase activator activity	2021-01-06	25/18352	0.00814682	0.0284462	0.00772731	10049	1
MF	GO:0016702	oxidoreductase activity, acting on single donors with incorporation of molecular oxygen, incorporation of two atoms of oxygen	2021-01-06	25/18352	0.00814682	0.0284462	0.00772731	247	1
MF	GO:0016701	oxidoreductase activity, acting on single donors with incorporation of molecular oxygen	2021-01-06	26/18352	0.00847154	0.0284462	0.00772731	247	1
MF	GO:0044183	protein folding chaperone	2021-01-06	27/18352	0.00879617	0.0284462	0.00772731	3315	1
MF	GO:0030291	protein serine/threonine kinase inhibitor activity	2021-01-06	31/18352	0.0100938	0.0284462	0.00772731	3315	1
MF	GO:0051059	NF-kappaB binding	2021-01-06	31/18352	0.0100938	0.0284462	0.00772731	92140	1
MF	GO:0060590	ATPase regulator activity	2021-01-06	41/18352	0.0133317	0.0344402	0.00935558	10049	1
MF	GO:0005080	protein kinase C binding	2021-01-06	55/18352	0.0178499	0.0425652	0.0115627	3315	1
MF	GO:0004860	protein kinase inhibitor activity	2021-01-06	65/18352	0.0210667	0.0448495	0.0121832	3315	1
MF	GO:0019210	kinase inhibitor activity	2021-01-06	69/18352	0.0223509	0.0448495	0.0121832	3315	1
MF	GO:0003725	double-stranded RNA binding	2021-01-06	76/18352	0.0245949	0.0448495	0.0121832	92140	1
MF	GO:0043130	ubiquitin binding	2021-01-06	76/18352	0.0245949	0.0448495	0.0121832	3315	1
MF	GO:0051213	dioxygenase activity	2021-01-06	91/18352	0.0293891	0.0495112	0.0134496	247	1
MF	GO:0032182	ubiquitin-like protein binding	2021-01-06	94/18352	0.0303456	0.0495112	0.0134496	3315	1
