# Supplementary material for: Novel Prognostic Signature for Acute Myeloid Leukemia: Bioinformatics Analysis of Combined CNV-Driven and Ferroptosis-Related Genes
Source: Front Genet. 2022 Apr 26;13:849437. doi: 10.3389/fgene.2022.849437 (PMC9086455; doi:10.3389/fgene.2022.849437)
Supplement: Supplementary file 13 [file Table5.xlsx]

## Sheet: up_genes_go
Supplementary Table 3. Upregulated DEGs in GO analysis.
ONTOLOGY	ID	Description	GeneRatio	BgRatio	pvalue	p.adjust	qvalue	geneID	Count
BP	GO:0022613	ribonucleoprotein complex biogenesis	147/2329	482/18866	8.7738e-27	5.28885e-23	4.52174e-23	54552/6431/8661/11052/9221/6426/23160/1968/51575/9188/8602/4686/8562/84128/1660/79707/23076/27292/11171/6059/1736/55127/64216/24148/8894/84946/96764/10658/27340/8669/54505/51747/134430/54881/118460/10946/101954264/51602/83732/55226/27316/9875/1653/9790/51729/55003/9816/11137/6125/23404/55720/27339/6880/22984/55623/54700/83939/26830/101954272/51187/7514/10521/79954/25929/100151683/8664/51001/10594…	147
BP	GO:0008380	RNA splicing	143/2329	487/18866	2.86342e-24	8.63035e-21	7.37858e-21	5411/10657/10492/6431/27336/65109/6426/8899/55749/4686/23091/9967/1660/23076/11171/5978/24148/96764/10658/23028/6651/10081/51747/10946/4841/101954264/79026/58517/26986/27316/1653/6421/51729/1665/9406/143884/55119/3185/3192/10262/284695/27339/55225/4691/10137/23013/26830/101954272/57187/10915/22826/54407/10521/23350/25929/100151683/8570/9991/10594/11193/51692/22916/55677/29890/6432/7072/6427/11646…	143
BP	GO:0000375	RNA splicing, via transesterification reactions	122/2329	393/18866	3.89013e-23	7.50428e-20	6.41584e-20	5411/10657/10492/6431/27336/65109/6426/8899/55749/4686/9967/1660/11171/5978/24148/96764/10658/23028/6651/10081/51747/10946/4841/101954264/58517/26986/27316/1653/6421/51729/1665/143884/3185/3192/10262/27339/55225/4691/23013/26830/101954272/22826/10521/23350/25929/100151683/8570/9991/10594/11193/51692/22916/29890/6432/7072/6427/4154/5430/27258/5725/1207/10949/51341/8161/5431/10772/988/11100/80004/6…	122
BP	GO:0000377	RNA splicing, via transesterification reactions with bulged adenosine as nucleophile	121/2329	390/18866	6.22452e-23	7.50428e-20	6.41584e-20	5411/10657/10492/6431/27336/65109/6426/8899/55749/4686/9967/1660/11171/5978/24148/96764/10658/23028/6651/10081/51747/10946/4841/101954264/58517/26986/27316/1653/6421/51729/1665/143884/3185/3192/10262/27339/55225/4691/23013/26830/101954272/22826/10521/23350/25929/100151683/9991/10594/11193/51692/22916/29890/6432/7072/6427/4154/5430/27258/5725/1207/10949/51341/8161/5431/10772/988/11100/80004/6628/1…	121
BP	GO:0000398	mRNA splicing, via spliceosome	121/2329	390/18866	6.22452e-23	7.50428e-20	6.41584e-20	5411/10657/10492/6431/27336/65109/6426/8899/55749/4686/9967/1660/11171/5978/24148/96764/10658/23028/6651/10081/51747/10946/4841/101954264/58517/26986/27316/1653/6421/51729/1665/143884/3185/3192/10262/27339/55225/4691/23013/26830/101954272/22826/10521/23350/25929/100151683/9991/10594/11193/51692/22916/29890/6432/7072/6427/4154/5430/27258/5725/1207/10949/51341/8161/5431/10772/988/11100/80004/6628/1…	121
BP	GO:0006260	DNA replication	90/2329	273/18866	2.7325e-19	2.74525e-16	2.34707e-16	54107/23244/79915/5429/9126/26057/1660/55159/5111/4172/11232/11198/54617/7486/4361/11073/55704/5884/6418/7157/5422/10111/5983/7150/8317/4173/54465/56897/4171/3159/64710/2237/5557/4175/6240/63901/79075/11169/10721/10036/9837/5985/5427/63967/83990/84515/5980/29803/4998/348654/1763/4782/890/163859/51514/546/4176/5930/675/90381/4796/5928/8914/51455/6117/8318/79733/672/81620/51659/56652/6749/201973/30…	90
BP	GO:0007059	chromosome segregation	100/2329	334/18866	5.8535e-18	5.0407e-15	4.30958e-15	55920/9698/23244/64793/9126/7155/283489/55706/23369/10664/83852/56916/292/1457/8243/23137/348995/54617/10592/4361/10270/9113/9391/55207/6421/7150/3192/23172/8697/10464/56852/9918/2237/9183/8881/79075/11331/54069/11339/440081/79980/83990/701/4292/10051/1654/4288/1499/1104/55166/348654/55719/23126/3619/10097/7153/442582/1060/546/5925/151246/23310/5885/9928/221150/11130/51203/11044/672/55143/81620/2…	100
BP	GO:0140014	mitotic nuclear division	88/2329	286/18866	9.07799e-17	6.50574e-14	5.56213e-14	23244/64793/9126/283489/55023/8243/23137/54617/10592/10270/3832/9585/4733/3192/23172/8697/10464/387/3796/9918/9183/8881/79075/11331/55125/8556/79980/9820/701/10051/440145/4041/4288/1104/348654/55719/23126/3619/1060/10600/22974/546/5925/151246/9735/23310/5885/3643/84687/9928/11130/8621/51203/126731/11044/23122/55143/81620/29127/64151/10735/146909/6683/64105/54892/54443/1062/7443/699/7272/5579/1111…	88
BP	GO:0051169	nuclear transport	102/2329	357/18866	9.71329e-17	6.50574e-14	5.56213e-14	10657/64328/10527/23633/6431/1434/57506/11052/26060/5781/9221/65109/6426/26019/55706/64062/4686/23279/3839/1660/6059/84271/7884/348995/5469/84946/10768/10541/9972/23225/811/2733/51569/11260/51496/7157/29072/7531/55746/26953/3843/53371/23511/3313/9631/57187/7514/3159/55705/23049/25929/3841/11331/51692/22916/55677/29890/6432/6427/3838/127933/3326/5903/51068/6815/6628/11168/9295/57510/23165/3181/553…	102
BP	GO:0016569	covalent chromatin modification	125/2329	481/18866	1.28943e-16	7.77269e-14	6.64532e-14	4602/54107/2033/8295/3054/10432/123169/3720/9031/10847/10664/117143/83852/56916/79723/9329/55870/9730/9739/5978/8473/11091/23326/23028/9682/10270/23522/55183/94104/23376/26009/8861/200424/2146/6418/7157/6421/23741/29072/7324/114803/11137/64324/79184/6880/1386/54880/4297/8089/80335/22823/55274/29128/9913/23168/23512/55167/23067/165918/9767/84656/55677/55170/23411/1789/58508/2005/8202/23186/3070/68…	125
BP	GO:0006913	nucleocytoplasmic transport	100/2329	354/18866	4.47331e-16	2.42567e-13	2.07385e-13	10657/64328/10527/23633/6431/1434/57506/11052/26060/5781/9221/65109/6426/26019/55706/64062/4686/23279/3839/1660/6059/84271/7884/348995/5469/84946/10768/10541/9972/23225/811/2733/51569/11260/51496/7157/29072/7531/55746/26953/3843/53371/23511/3313/9631/57187/7514/55705/23049/25929/3841/11331/51692/22916/55677/29890/6432/6427/3838/127933/3326/5903/51068/6815/6628/9295/57510/23165/3181/55341/65083/66…	100
BP	GO:1903311	regulation of mRNA metabolic process	98/2329	344/18866	4.82881e-16	2.42567e-13	2.07385e-13	10657/9698/23367/328/10492/6431/11052/6426/123169/55802/23369/54915/4686/678/51441/9967/1660/5978/10658/10768/6651/9475/118460/79675/58517/26986/27316/6418/3192/10262/23404/27339/7529/4691/87178/201626/7514/10521/55603/8570/5073/9991/22916/55677/29890/6432/7072/6427/4154/5725/10949/51341/60493/149041/1981/10772/5684/904/4904/27327/1655/708/5695/3181/2475/26135/3190/1859/140890/253943/79811/29896/…	98
BP	GO:0071103	DNA conformation change	100/2329	355/18866	5.489e-16	2.54521e-13	2.17604e-13	54107/9557/7155/10664/83852/56916/1660/4172/80205/55320/10541/10592/7486/4361/10270/23522/10146/23132/25/1653/7259/6418/7157/10111/5983/7150/1108/2967/4173/23270/56897/50809/25842/4171/3159/56852/9918/8467/4175/79075/142/79682/10721/22893/23411/10036/54069/5985/7520/11339/440081/83990/10051/1654/3070/84515/55166/79829/1763/7507/3619/3181/7153/54737/2547/1060/546/4176/23310/8294/5928/10155/51203/8…	100
BP	GO:0016570	histone modification	121/2329	468/18866	6.08275e-16	2.61906e-13	2.23918e-13	4602/54107/2033/8295/3054/10432/123169/3720/9031/10847/10664/117143/83852/56916/79723/9329/55870/9730/9739/5978/8473/11091/23326/23028/9682/10270/23522/55183/94104/23376/26009/8861/200424/2146/6418/7157/6421/23741/29072/7324/114803/11137/64324/79184/6880/1386/54880/4297/8089/80335/22823/55274/29128/9913/23168/23512/55167/23067/165918/9767/84656/55677/55170/23411/1789/58508/2005/8202/23186/6872/14…	121
BP	GO:0033044	regulation of chromosome organization	100/2329	356/18866	6.72787e-16	2.70371e-13	2.31155e-13	4602/54552/3720/10664/83852/29028/1736/9739/8473/23137/80351/11091/23028/10694/4361/10270/26354/55183/94104/55226/6418/7157/10111/6421/23741/10575/3192/64324/10576/54880/4297/8697/22823/25842/908/4171/3159/23168/2237/9183/23049/8881/5073/84656/142/55677/4609/55170/23411/1789/7520/701/4288/56252/1499/79829/348654/55719/10574/3181/7153/2648/54737/6598/546/5925/5885/55904/10155/54454/90780/79618/831…	100
BP	GO:0006403	RNA localization	76/2329	236/18866	7.2705e-16	2.73916e-13	2.34187e-13	10657/6431/11052/65109/6426/26019/55706/64062/4686/9804/23279/1660/6059/84271/1736/7884/10128/24148/7528/348995/84946/10694/9972/23225/2733/11260/51602/6421/29072/10575/3192/23404/55746/10576/9793/53371/87178/23511/9631/908/57187/7514/23049/8570/5073/51692/22916/55677/29890/6432/6427/5903/51068/4904/9295/57510/23165/10574/3181/55341/65083/54680/10644/55153/6430/84248/9908/55916/10250/29074/7203/3…	76
BP	GO:0006302	double-strand break repair	80/2329	262/18866	3.6878e-15	1.30765e-12	1.11798e-12	56916/55159/4172/407006/4436/23137/7528/54617/23028/7486/4361/55183/5893/7913/7516/1653/7157/5422/10111/6421/29072/8317/27339/79184/4173/54537/4171/64710/2237/4175/165918/142/10721/196528/63979/7520/51341/83990/10635/4292/84515/51444/5980/348654/55719/1763/10097/22909/56893/2547/64421/4176/5885/675/8294/4796/8914/8438/6117/80311/8318/3014/11044/672/2305/7468/51659/64110/9656/4174/80010/151636/111…	80
BP	GO:0071826	ribonucleoprotein complex subunit organization	75/2329	240/18866	6.8632e-15	2.29841e-12	1.96504e-12	6431/8661/11052/6426/1968/4686/8562/1660/3799/11171/24148/8894/96764/10658/8669/54505/51747/10946/101954264/27316/1653/6125/27339/6880/26830/101954272/51187/25929/100151683/8664/10594/8668/1975/7520/1207/3326/8161/10772/6628/11168/6135/101954277/55015/54680/23195/26284/26523/26824/26828/6631/6635/10728/6430/57819/3646/26831/50628/220717/1983/51154/23020/3320/11051/192670/10659/79752/103/6175/5591…	75
BP	GO:0000280	nuclear division	111/2329	428/18866	7.93188e-15	2.51649e-12	2.15149e-12	23244/64793/9126/7155/283489/55706/55023/8243/23137/54617/10592/4361/10270/811/3832/10111/9585/4733/3192/23172/9897/8697/10464/387/3796/116138/9918/9183/8881/79075/11331/63979/55125/8556/79980/83990/9820/701/4292/10051/440145/4041/4288/1104/348654/55719/23126/3619/10097/7153/1060/10600/22974/546/5925/151246/9735/84930/23310/5885/1164/675/3643/84687/9928/11130/8621/51203/8438/259266/126731/11044/2…	111
BP	GO:0022618	ribonucleoprotein complex assembly	73/2329	233/18866	1.35509e-14	4.08425e-12	3.49186e-12	6431/8661/11052/6426/1968/4686/8562/1660/11171/24148/8894/96764/10658/8669/54505/51747/10946/101954264/27316/1653/6125/27339/6880/26830/101954272/51187/25929/100151683/8664/10594/8668/1975/7520/1207/3326/8161/10772/6628/11168/6135/101954277/55015/54680/23195/26284/26523/26824/26828/6631/6635/10728/6430/57819/3646/26831/50628/220717/1983/51154/23020/3320/11051/192670/10659/103/6175/5591/23451/2682…	73
BP	GO:0018205	peptidyl-lysine modification	106/2329	405/18866	1.68442e-14	4.83508e-12	4.13379e-12	4602/54552/54107/2033/8295/3054/3720/10847/55706/10664/117143/83852/6659/23279/79723/9329/55870/9739/8473/11091/348995/23326/23028/9972/23522/23225/26354/55183/26009/8861/200424/2146/6418/23741/29072/11137/64324/55746/6880/1386/54880/4297/10054/53371/1958/23511/8089/80335/22823/55274/6612/9631/9913/23168/23512/55167/23067/57178/9767/84656/57691/55677/55170/23411/1789/58508/5903/8202/6872/1499/231…	106
BP	GO:0000819	sister chromatid segregation	65/2329	196/18866	1.886e-14	5.0457e-12	4.31386e-12	23244/9126/7155/283489/10664/8243/23137/54617/10592/4361/10270/9113/6421/3192/8697/10464/9918/2237/9183/8881/79075/11331/440081/79980/701/10051/1499/348654/55719/23126/3619/7153/442582/1060/546/5925/151246/23310/5885/9928/11130/51203/11044/55143/81620/29127/64151/10735/146909/64105/54892/1062/699/7272/24137/11004/23397/1063/3833/113130/10783/891/9055/10615/991	65
BP	GO:0042254	ribosome biogenesis	88/2329	310/18866	1.9252e-14	5.0457e-12	4.31386e-12	54552/9221/23160/51575/9188/8602/84128/79707/23076/27292/6059/1736/55127/64216/84946/27340/54505/134430/54881/118460/51602/83732/55226/9875/9790/51729/55003/9816/11137/6125/23404/55720/22984/55623/54700/83939/51187/7514/10521/79954/51001/25926/153443/7520/57050/55006/6194/80135/84365/51068/22803/1654/9724/23517/28987/4736/6135/708/55341/65083/54680/23195/26284/10153/55153/65008/8886/705/6202/5036…	88
BP	GO:0006261	DNA-dependent DNA replication	55/2329	151/18866	2.25438e-14	5.40458e-12	4.62068e-12	54107/79915/55159/5111/4172/11232/54617/7486/4361/11073/5422/5983/8317/4173/54465/56897/4171/3159/64710/2237/5557/4175/79075/11169/10721/9837/5985/5427/5980/4998/348654/1763/546/4176/675/90381/4796/8914/6117/8318/79733/81620/51659/56652/201973/30968/55388/91607/92667/51053/4174/4683/5426/25939/9401	55
BP	GO:0006413	translational initiation	64/2329	192/18866	2.28006e-14	5.40458e-12	4.62068e-12	10657/23367/8661/1968/54915/4686/8562/51441/1979/56919/1967/6059/8894/9669/8669/54505/2733/26986/1653/1982/6125/4528/1964/83939/8664/22916/1974/8668/1975/468/127933/6194/440275/1981/84919/1654/6230/4736/6135/6191/2475/8672/253943/3646/6202/55364/6129/6229/6206/1983/4869/6207/6222/6189/6164/6175/6218/6133/1978/6227/6155/6122/6144/6154	64
BP	GO:0000724	double-strand break repair via homologous recombination	52/2329	138/18866	2.3311e-14	5.40458e-12	4.62068e-12	55159/4172/23137/7528/54617/23028/7486/4361/55183/5893/7516/10111/6421/29072/8317/4173/54537/4171/64710/2237/4175/142/10721/196528/63979/10635/84515/51444/5980/348654/10097/22909/56893/4176/5885/675/4796/8914/8438/6117/80311/8318/3014/672/51659/64110/4174/80010/1111/4683/25939/9401	52
BP	GO:0051052	regulation of DNA metabolic process	98/2329	365/18866	3.01641e-14	6.73441e-12	5.75763e-12	54552/79915/5429/54726/56916/1660/5111/11232/1736/407006/4436/80351/23028/7486/10694/4361/2956/26354/55183/5893/7913/118460/55226/1676/7157/10111/29072/5983/10575/3192/10576/79184/4297/54537/56897/908/64710/23049/5073/165918/79075/7398/142/10721/196528/4609/23411/63979/54069/5985/7520/3838/3326/10635/1054/4292/56252/1499/55719/10574/10097/3181/54737/56893/546/143/221656/10728/90381/8914/10155/796…	98
BP	GO:0000725	recombinational repair	52/2329	140/18866	4.60253e-14	9.90859e-12	8.47142e-12	55159/4172/23137/7528/54617/23028/7486/4361/55183/5893/7516/10111/6421/29072/8317/4173/54537/4171/64710/2237/4175/142/10721/196528/63979/10635/84515/51444/5980/348654/10097/22909/56893/4176/5885/675/4796/8914/8438/6117/80311/8318/3014/672/51659/64110/4174/80010/1111/4683/25939/9401	52
BP	GO:0032392	DNA geometric change	46/2329	116/18866	8.12909e-14	1.68973e-11	1.44465e-11	9557/56916/1660/4172/80205/7486/4361/10146/23132/1653/7157/10111/5983/1108/2967/4173/56897/4171/3159/56852/4175/79075/142/10721/5985/7520/440081/83990/1654/84515/1763/7507/3181/7153/2547/546/4176/8438/6117/51659/56652/4174/4683/84181/9401/301	46
BP	GO:0006401	RNA catabolic process	106/2329	415/18866	9.45089e-14	1.899e-11	1.62356e-11	9698/23367/328/10492/65109/26019/55802/23369/54915/4686/678/115752/51441/55571/9967/1660/255967/57472/1736/10128/7812/9125/9475/118460/79675/26986/6418/6125/3192/55629/23404/7529/87178/201626/7514/2237/23049/55603/8570/9652/5073/22916/27258/10949/60493/149041/6194/1981/22803/4292/5684/4904/23517/6230/4736/27327/6135/1655/1763/6191/5695/2475/26135/26523/253943/54542/10644/57819/3646/6202/5707/1104…	106
BP	GO:0006310	DNA recombination	84/2329	299/18866	1.42558e-13	2.77207e-11	2.37e-11	328/79915/7155/56916/55159/4172/54891/9730/4436/23137/7528/7247/54617/23028/7486/4361/2956/55183/5893/118460/4841/7516/10111/6421/29072/8317/4173/54537/4171/7374/64710/116138/2237/4175/165918/142/10721/196528/63979/7520/3838/83990/10635/4292/84515/51444/5980/348654/10097/22909/7153/56893/2547/64421/4176/5885/675/4796/4798/8914/8438/6117/80311/8318/3014/672/7468/51659/86/64110/84057/4174/80010/703…	84
BP	GO:0051168	nuclear export	65/2329	204/18866	1.57756e-13	2.97173e-11	2.5407e-11	10657/64328/6431/1434/11052/5781/65109/6426/26019/55706/64062/4686/23279/1660/6059/84271/7884/348995/84946/10768/10541/9972/23225/811/2733/11260/51496/7157/29072/7531/55746/53371/23511/3313/9631/57187/7514/23049/51692/22916/55677/29890/6432/6427/127933/5903/51068/6815/9295/57510/23165/3181/55341/65083/55153/6430/84248/10250/3178/4869/6741/126549/3087/7295/23039	65
BP	GO:0000082	G1/S transition of mitotic cell cycle	81/2329	287/18866	2.97034e-13	5.42583e-11	4.63885e-11	693175/10657/1021/54107/328/2033/26060/6659/26057/55571/55159/5111/4172/8065/57472/407006/6502/54617/5311/5933/9125/9113/2146/7157/5422/835/8317/4173/5471/8454/4171/5557/4175/4609/407007/5427/26524/1981/4194/1654/84515/1104/51499/4998/7298/10106/5925/4176/55904/1871/128239/9928/51379/5325/894/6117/8318/993/79733/5530/81620/55388/91607/2672/6868/51053/4174/1869/596/7027/5591/983/1978/7029/891/5426…	81
BP	GO:0006611	protein export from nucleus	60/2329	184/18866	4.37038e-13	7.45673e-11	6.37519e-11	64328/6431/1434/5781/65109/6426/26019/55706/4686/23279/6059/84271/7884/348995/84946/10768/10541/9972/23225/811/2733/11260/51496/7157/29072/7531/55746/53371/23511/3313/9631/57187/7514/23049/51692/22916/55677/29890/6432/6427/127933/5903/51068/6815/9295/57510/23165/3181/55341/65083/55153/6430/84248/10250/4869/6741/126549/3087/7295/23039	60
BP	GO:0032508	DNA duplex unwinding	43/2329	108/18866	4.43513e-13	7.45673e-11	6.37519e-11	9557/56916/1660/4172/80205/7486/4361/10146/23132/1653/10111/5983/1108/2967/4173/56897/4171/3159/56852/4175/79075/142/10721/5985/7520/440081/83990/1654/84515/1763/7507/7153/2547/546/4176/6117/51659/56652/4174/4683/84181/9401/301	43
BP	GO:0044843	cell cycle G1/S phase transition	85/2329	310/18866	4.45326e-13	7.45673e-11	6.37519e-11	693175/10657/1021/54107/328/2033/26060/6659/26057/55571/55159/5111/4172/8065/57472/407006/6502/54617/5311/5933/9125/9113/2146/7157/5422/835/8317/4173/5471/8454/4171/5557/4175/11331/4609/407007/5427/26524/1981/4194/1654/84515/6872/1104/51499/4998/7298/890/10106/5925/4176/55904/1871/128239/9928/51379/5325/894/6117/8318/993/79733/5530/493/81620/55388/91607/2672/6868/51053/4174/1869/596/7027/5591/983…	85
BP	GO:0034660	ncRNA metabolic process	118/2329	493/18866	4.83516e-13	7.69561e-11	6.57942e-11	9221/23160/51575/9188/8602/115752/84128/10056/1615/79979/79707/23076/27292/55157/57508/1736/55127/25896/64216/27340/2058/55699/134430/54881/118460/51602/4677/83732/55226/9875/1653/3376/6894/9790/51729/6125/23404/55720/22984/55623/87178/54482/2193/10521/79954/81556/8570/5073/9255/5917/25926/158234/54901/221078/10785/51520/127253/153443/79731/116461/8575/57050/8518/149041/55006/142940/6194/80135/84…	118
BP	GO:0031570	DNA integrity checkpoint	55/2329	161/18866	4.85125e-13	7.69561e-11	6.57942e-11	2033/5781/7155/6659/55571/55159/5111/57472/25896/4436/9125/4361/11073/5884/7157/835/27339/79184/1386/54465/10116/57551/63967/83990/440275/988/4194/51499/4998/1763/261726/7153/51514/51347/90381/8914/5325/8318/3014/79733/672/79968/81620/9656/1869/84444/7027/1111/5591/4683/983/7029/891/6154/28984	55
BP	GO:0050684	regulation of mRNA processing	53/2329	152/18866	5.06702e-13	7.83179e-11	6.69585e-11	10657/6431/11052/6426/123169/4686/9967/1660/5978/10658/10768/6651/58517/27316/3192/10262/27339/4691/10521/9991/22916/55677/29890/6432/7072/6427/4154/5725/51341/10772/904/1655/708/3181/3190/1859/140890/79811/29896/57703/64783/6430/3178/51574/6434/11051/10150/10659/9646/6626/3312/10929/891	53
BP	GO:1901990	regulation of mitotic cell cycle phase transition	110/2329	448/18866	5.27635e-13	7.95145e-11	6.79816e-11	693175/55920/1021/328/79915/2033/26060/7532/11064/678/6659/26057/55571/55159/5111/57472/407006/203068/54617/5311/5933/9125/4361/11073/2146/5884/7157/55835/22919/7531/7324/835/80184/8317/9793/8697/8454/22995/9183/8881/11331/54801/407007/57551/55125/8556/63967/1981/701/5684/4194/1654/9702/51499/4998/348654/5695/51514/22974/10106/5925/9735/51347/10733/5885/55904/10383/9662/10142/90381/84687/9928/108…	110
BP	GO:0050657	nucleic acid transport	63/2329	200/18866	6.6272e-13	9.51161e-11	8.13202e-11	10657/6431/11052/65109/6426/26019/55706/64062/4686/9804/23279/1660/6059/84271/7884/10128/348995/84946/9972/23225/2733/11260/6421/29072/3192/55746/9793/53371/87178/23511/9631/57187/7514/23049/8570/51692/22916/55677/29890/6432/6427/5903/51068/4904/9295/57510/23165/3181/55341/65083/10644/55153/6430/84248/9908/55916/10250/29074/3178/4869/6741/23299/3087	63
BP	GO:0050658	RNA transport	63/2329	200/18866	6.6272e-13	9.51161e-11	8.13202e-11	10657/6431/11052/65109/6426/26019/55706/64062/4686/9804/23279/1660/6059/84271/7884/10128/348995/84946/9972/23225/2733/11260/6421/29072/3192/55746/9793/53371/87178/23511/9631/57187/7514/23049/8570/51692/22916/55677/29890/6432/6427/5903/51068/4904/9295/57510/23165/3181/55341/65083/10644/55153/6430/84248/9908/55916/10250/29074/3178/4869/6741/23299/3087	63
BP	GO:0098813	nuclear chromosome segregation	77/2329	272/18866	9.66644e-13	1.3551e-10	1.15855e-10	55920/23244/9126/7155/283489/55706/10664/8243/23137/54617/10592/4361/10270/9113/6421/3192/23172/8697/10464/9918/2237/9183/8881/79075/11331/440081/79980/83990/701/4292/10051/1499/55166/348654/55719/23126/3619/10097/7153/442582/1060/546/5925/151246/23310/5885/9928/11130/51203/11044/55143/81620/29127/64151/10735/146909/64105/54892/192670/1062/1778/57082/699/80010/7272/57820/24137/11004/23397/1063/38…	77
BP	GO:0048285	organelle fission	114/2329	476/18866	1.16096e-12	1.59052e-10	1.35982e-10	23244/64793/9126/7155/283489/55706/10059/55023/8243/23137/54617/10592/4361/10270/811/3832/10111/9585/4733/3192/23172/9897/8697/10464/387/3796/116138/9918/9183/8881/79075/11331/63979/55125/8556/79980/83990/9820/701/4292/10051/440145/4041/4288/1104/348654/55719/23126/3619/10097/7153/1060/10600/22974/546/5925/151246/9735/84930/23310/5885/1164/675/4976/3643/84687/9928/11130/8621/51203/8438/259266/126…	114
BP	GO:0051236	establishment of RNA localization	63/2329	203/18866	1.3921e-12	1.8648e-10	1.59433e-10	10657/6431/11052/65109/6426/26019/55706/64062/4686/9804/23279/1660/6059/84271/7884/10128/348995/84946/9972/23225/2733/11260/6421/29072/3192/55746/9793/53371/87178/23511/9631/57187/7514/23049/8570/51692/22916/55677/29890/6432/6427/5903/51068/4904/9295/57510/23165/3181/55341/65083/10644/55153/6430/84248/9908/55916/10250/29074/3178/4869/6741/23299/3087	63
BP	GO:0006402	mRNA catabolic process	96/2329	376/18866	1.44207e-12	1.88974e-10	1.61565e-10	9698/23367/328/10492/65109/26019/55802/23369/54915/4686/678/51441/55571/9967/1660/255967/57472/7812/9125/9475/118460/79675/26986/6418/6125/3192/55629/23404/7529/87178/201626/7514/23049/55603/8570/9652/5073/22916/27258/10949/60493/149041/6194/1981/22803/4292/5684/4904/6230/4736/27327/6135/1655/6191/5695/2475/26135/26523/253943/54542/10644/57819/3646/6202/5707/11044/6129/25819/23112/6229/10236/6206…	96
BP	GO:0043484	regulation of RNA splicing	53/2329	156/18866	1.64168e-12	2.10554e-10	1.80014e-10	10657/6431/6426/4686/9967/23076/5978/10658/6651/79026/58517/27316/3185/3192/10262/284695/27339/4691/10137/54407/10521/9991/29890/6432/7072/6427/4154/5430/5725/51341/10772/80004/1655/3187/708/3181/3190/1859/140890/29896/57703/64783/6430/3178/51574/389677/6434/6207/10150/10659/3312/10929/5295	53
BP	GO:0006417	regulation of translation	109/2329	450/18866	1.70604e-12	2.14251e-10	1.83175e-10	693175/10657/9698/23367/10492/4076/9221/65109/1968/23369/54915/23173/4686/678/6659/51441/55571/1660/1979/60558/1967/57472/6726/84271/407006/10128/9669/10658/9125/1938/54505/2058/811/113251/2733/9475/55226/9933/26986/1653/11236/1982/26046/7555/6125/3658/406900/4528/4691/83939/85451/10985/387/25929/55005/9728/8570/9991/8664/22916/1974/1975/407007/26065/7072/407018/468/5725/149041/127933/440275/1981…	109
BP	GO:0000723	telomere maintenance	54/2329	161/18866	1.81876e-12	2.22096e-10	1.89882e-10	54552/54107/328/5111/1736/23137/80351/7486/10694/4361/26354/55183/55226/5422/10111/5983/10575/3192/10576/908/2237/5557/23049/5073/142/4609/5985/5427/7520/3326/56252/1499/1763/10574/3181/2547/546/64421/675/8294/10728/6117/79618/7203/3178/54433/3320/79991/5591/4683/140609/8364/5426/9401	54
BP	GO:0000075	cell cycle checkpoint	66/2329	219/18866	1.8422e-12	2.22096e-10	1.89882e-10	2033/5781/7155/6659/55571/55159/5111/57472/25896/4436/9125/4361/11073/5884/7157/835/27339/79184/1386/54465/10116/9183/57551/63967/83990/440275/988/701/4194/51499/4998/55055/348654/1763/261726/7153/51514/5925/9735/51347/90381/11130/8914/5325/8318/3014/79733/672/79968/81620/9656/1869/699/84444/7027/7272/1111/5591/4683/1063/983/7029/891/6154/28984/991	66
BP	GO:1901987	regulation of cell cycle phase transition	115/2329	486/18866	2.15067e-12	2.54201e-10	2.17331e-10	693175/55920/1021/328/79915/2033/26060/7532/11064/678/6659/26057/55571/55159/5111/57472/407006/203068/54617/5311/5933/9125/4361/11073/2146/5884/7157/55835/22919/7531/7324/835/80184/8317/79184/9793/8697/8454/22995/9183/8881/11331/54801/407007/57551/55125/8556/63967/1981/701/5684/4194/1654/6872/9702/51499/4998/348654/5695/51514/22974/10106/5925/9735/51347/10733/5885/55904/10383/9662/10142/90381/846…	115
BP	GO:0015931	nucleobase-containing compound transport	74/2329	261/18866	2.46232e-12	2.85439e-10	2.44038e-10	10657/6431/11052/65109/6426/26019/55706/64062/4686/9804/23279/292/1660/6059/84271/7884/10128/348995/84946/9972/23225/2733/11260/55186/23443/293/6421/29072/3192/55746/9793/53371/87178/23511/203427/9631/57187/7514/81034/23049/8570/23169/51692/22916/55677/29890/6432/6427/347734/5903/51068/4904/9295/57510/84912/23165/3181/55341/65083/10644/55153/6430/84248/9908/55916/10250/29074/3178/4869/51000/6741/…	74
BP	GO:0006405	RNA export from nucleus	50/2329	144/18866	2.75133e-12	3.12924e-10	2.67537e-10	10657/6431/11052/65109/6426/26019/55706/64062/4686/23279/1660/6059/84271/7884/348995/84946/9972/23225/2733/11260/29072/55746/53371/23511/9631/57187/7514/23049/51692/22916/55677/29890/6432/6427/5903/51068/9295/57510/23165/3181/55341/65083/55153/6430/84248/10250/3178/4869/6741/3087	50
BP	GO:0072331	signal transduction by p53 class mediator	75/2329	267/18866	2.90439e-12	3.24216e-10	2.77191e-10	79915/2033/6882/6659/55571/6908/1457/5111/57472/4436/11198/23028/9125/7486/4361/11073/5884/7157/10111/5983/835/1108/55003/8805/6125/83860/6880/6873/54700/3094/204851/7159/55170/23411/51616/5985/83990/4194/6872/51499/6135/1655/1763/10210/22974/3190/546/1859/675/5565/5928/7862/6875/754/5325/79073/6117/79733/672/2305/6749/6879/1869/80010/596/7027/1111/5366/4683/983/7029/891/6154/94241/28984	75
BP	GO:2001252	positive regulation of chromosome organization	58/2329	182/18866	3.15273e-12	3.45539e-10	2.95421e-10	4602/3720/83852/1736/8473/23137/80351/11091/23028/10694/4361/10270/26354/55183/94104/7157/10111/6421/10575/3192/10576/4297/8697/22823/908/23168/2237/8881/5073/84656/23411/1789/7520/1499/55719/10574/3181/2648/54737/6598/546/5925/5885/55904/10155/79618/23272/672/408/7203/81620/3178/1786/9646/8986/4683/140609/891	58
BP	GO:0034968	histone lysine methylation	43/2329	116/18866	7.64855e-12	8.23312e-10	7.03897e-10	4602/3720/83852/79723/55870/9739/8473/11091/23028/55183/200424/2146/29072/11137/64324/54880/4297/80335/22823/23168/23512/23067/55677/55170/23411/1789/58508/1499/8085/6598/546/55904/23170/90780/672/5926/7468/55209/2672/1786/9646/84444/7552	43
BP	GO:0032200	telomere organization	55/2329	174/18866	1.6349e-11	1.72898e-09	1.47821e-09	54552/54107/328/5111/1736/23137/80351/7486/10694/4361/26354/55183/55226/5422/10111/5983/10575/3192/10576/908/2237/5557/23049/5073/142/4609/5985/5427/7520/3326/56252/1499/1763/10574/3181/2547/546/64421/675/8294/10728/6117/79618/7203/3178/54433/3320/84444/79991/5591/4683/140609/8364/5426/9401	55
BP	GO:0000956	nuclear-transcribed mRNA catabolic process	62/2329	210/18866	2.26795e-11	2.3413e-09	2.00171e-09	65109/26019/55802/4686/678/55571/9967/255967/57472/7812/9125/118460/26986/6125/55629/23404/201626/23049/9652/5073/22916/27258/149041/6194/1981/22803/4292/6230/4736/27327/6135/1655/6191/26523/54542/57819/3646/6202/11044/6129/25819/23112/6229/6206/167153/51154/56915/6207/550643/6741/6222/6189/6164/1656/6175/6218/6133/6227/6155/6122/6144/6154	62
BP	GO:0051054	positive regulation of DNA metabolic process	60/2329	200/18866	2.29158e-11	2.3413e-09	2.00171e-09	79915/54726/1660/5111/11232/1736/4436/80351/7486/10694/4361/26354/55183/118460/10111/5983/10575/10576/79184/54537/908/5073/165918/79075/142/196528/4609/23411/5985/7520/3326/1054/4292/1499/55719/10574/10097/3181/546/10728/8914/10155/79618/3014/672/2305/7468/7203/23201/3178/7490/3320/7037/151636/5591/4683/140609/7552/28984/9760	60
BP	GO:0000070	mitotic sister chromatid segregation	52/2329	161/18866	2.35201e-11	2.36299e-09	2.02026e-09	23244/283489/8243/23137/54617/10592/10270/3192/8697/10464/9918/9183/8881/79075/79980/701/10051/348654/55719/23126/3619/1060/546/5925/151246/23310/5885/9928/11130/51203/11044/55143/81620/29127/64151/146909/64105/54892/1062/699/7272/24137/11004/23397/1063/3833/113130/10783/891/9055/10615/991	52
BP	GO:0006338	chromatin remodeling	63/2329	218/18866	4.28649e-11	4.2359e-09	3.62151e-09	4602/8289/54107/55193/6599/9557/3054/3720/9031/10847/83852/56916/79723/54617/55320/9682/22955/114803/7150/6595/1108/57492/81611/3159/8467/2186/79682/22893/4609/23411/54069/57798/6601/51341/11339/22890/3070/55166/79829/2648/54737/1060/6598/546/5925/5757/8294/5928/57459/54108/10155/23272/86/6304/64105/4869/7019/1786/57082/64946/10765/8364/55355	63
BP	GO:0048024	regulation of mRNA splicing, via spliceosome	41/2329	113/18866	5.12516e-11	4.98297e-09	4.26023e-09	10657/6431/6426/4686/9967/5978/10658/6651/58517/27316/3192/10262/27339/4691/10521/9991/29890/6432/7072/6427/4154/5725/51341/10772/1655/708/3181/3190/1859/140890/29896/57703/64783/6430/3178/51574/6434/10150/10659/3312/10929	41
BP	GO:0071426	ribonucleoprotein complex export from nucleus	44/2329	130/18866	1.43914e-10	1.377e-08	1.17728e-08	6431/65109/6426/26019/55706/4686/23279/6059/84271/7884/348995/84946/9972/23225/2733/11260/29072/55746/53371/23511/9631/57187/7514/23049/51692/22916/55677/29890/6432/6427/5903/51068/9295/23165/3181/55341/65083/55153/6430/84248/10250/4869/6741/3087	44
BP	GO:0071166	ribonucleoprotein complex localization	44/2329	131/18866	1.91055e-10	1.7995e-08	1.53849e-08	6431/65109/6426/26019/55706/4686/23279/6059/84271/7884/348995/84946/9972/23225/2733/11260/29072/55746/53371/23511/9631/57187/7514/23049/51692/22916/55677/29890/6432/6427/5903/51068/9295/23165/3181/55341/65083/55153/6430/84248/10250/4869/6741/3087	44
BP	GO:1901796	regulation of signal transduction by p53 class mediator	54/2329	180/18866	2.2606e-10	2.09645e-08	1.79237e-08	79915/2033/6882/6908/1457/11198/23028/7486/4361/11073/5884/7157/10111/5983/1108/55003/8805/6125/83860/6880/6873/54700/204851/7159/55170/23411/51616/5985/83990/4194/6872/51499/6135/1655/1763/22974/3190/1859/5565/5928/7862/6875/754/6117/672/6749/6879/80010/596/1111/5366/4683/6154/94241	54
BP	GO:0000077	DNA damage checkpoint	48/2329	151/18866	2.52813e-10	2.28405e-08	1.95277e-08	2033/5781/6659/55571/55159/5111/57472/25896/4436/9125/4361/11073/5884/7157/835/27339/79184/1386/54465/10116/57551/63967/83990/440275/988/4194/51499/261726/51514/51347/90381/5325/3014/79733/672/79968/9656/1869/84444/7027/1111/5591/4683/983/7029/891/6154/28984	48
BP	GO:0090068	positive regulation of cell cycle process	77/2329	302/18866	2.53868e-10	2.28405e-08	1.95277e-08	693175/55920/328/79915/2033/6659/26057/55571/5111/55023/57472/407006/23137/54617/5469/5311/79848/9125/9475/2146/7157/55835/6421/9585/835/8317/3192/8697/387/2237/8881/11331/407007/8556/1981/4194/1654/4041/51499/348654/55719/51514/546/5925/10733/5885/55904/115426/3643/9928/51379/5325/51203/894/8318/993/79733/5586/672/81620/29127/6683/4869/1778/6868/1869/7027/983/113130/7029/891/255324/6154/10615/75…	77
BP	GO:0006364	rRNA processing	63/2329	227/18866	2.72989e-10	2.39291e-08	2.04584e-08	9221/23160/51575/9188/8602/84128/79707/23076/27292/1736/55127/64216/27340/134430/54881/118460/51602/83732/55226/9875/9790/51729/6125/23404/55720/22984/55623/10521/79954/25926/153443/57050/55006/6194/80135/84365/22803/9724/23517/28987/4736/6135/65083/54680/23195/65008/8886/705/6202/5036/50628/26156/6129/6229/54433/51119/51154/56915/5591/6218/6227/6155/6154	63
BP	GO:0071897	DNA biosynthetic process	57/2329	196/18866	2.73906e-10	2.39291e-08	2.04584e-08	54552/54107/5429/5111/11232/1736/80351/7486/10694/4361/55226/7157/5422/10111/26073/5983/10575/3192/10576/56897/908/5073/79075/10721/4609/23411/5985/5427/7520/3326/22890/5980/1499/7298/10574/3181/51514/143/10728/54108/51455/6117/79618/7203/3178/54433/7083/201973/3320/7027/79991/9768/1063/140609/5426/1791/28984	57
BP	GO:0016072	rRNA metabolic process	65/2329	238/18866	2.98876e-10	2.57375e-08	2.20044e-08	9221/23160/51575/9188/8602/115752/84128/79707/23076/27292/1736/55127/64216/27340/134430/54881/118460/51602/83732/55226/9875/9790/51729/6125/23404/55720/22984/55623/10521/79954/25926/153443/57050/55006/6194/80135/84365/22803/9724/23517/28987/4736/6135/65083/54680/23195/65008/8886/705/6202/5036/50628/26156/6129/6229/54433/51119/51154/56915/91607/5591/6218/6227/6155/6154	65
BP	GO:0016571	histone methylation	46/2329	143/18866	3.82136e-10	3.21596e-08	2.74951e-08	4602/3720/10664/83852/79723/55870/9739/8473/11091/23028/55183/94104/200424/2146/29072/11137/64324/54880/4297/80335/22823/23168/23512/23067/55677/55170/23411/1789/58508/1499/8085/6598/546/55904/23170/90780/672/5926/7468/55209/6304/2672/1786/9646/84444/7552	46
BP	GO:0034504	protein localization to nucleus	72/2329	277/18866	3.84123e-10	3.21596e-08	2.74951e-08	10527/23633/1434/57506/26060/200576/9221/3839/1736/5469/7486/10694/9972/811/25885/51569/7157/7531/10575/83860/3192/55746/10576/26953/4771/3843/53371/23511/6612/9631/908/7514/9913/55705/3841/142/11331/3838/55726/51341/3326/5903/51068/23607/6135/7507/10574/10210/23534/1871/30000/10155/754/705/55916/5530/6850/7203/3728/51574/3842/284/23515/7037/151636/3087/114882/7295/983/3717/9500/5295	72
BP	GO:0045787	positive regulation of cell cycle	93/2329	396/18866	4.28914e-10	3.54177e-08	3.02807e-08	693175/55920/328/79915/2033/5781/3054/6659/26057/55571/5111/55023/57472/407006/23137/23326/54617/5469/5311/79848/9125/811/9475/25/2146/7157/26073/55835/6421/9585/835/8317/3192/8697/387/2237/8881/10370/11331/407007/8556/3326/1981/4194/1654/904/4041/51499/348654/55719/1845/51514/546/5925/10733/5885/1164/675/55904/115426/3643/9928/51379/5325/51203/894/8318/993/79733/5586/672/905/81620/29127/6683/486…	93
BP	GO:0034502	protein localization to chromosome	33/2329	85/18866	5.00182e-10	4.07445e-08	3.48349e-08	55920/54552/283489/10664/1736/4436/80351/10694/26354/1200/2146/29072/10575/10576/908/9183/7520/84515/55166/55719/10574/546/5925/5885/675/6117/23272/7203/81620/57082/7272/983/113130	33
BP	GO:0019080	viral gene expression	56/2329	195/18866	6.59976e-10	5.30445e-08	4.53508e-08	8661/2033/55706/6882/8562/23279/1660/23076/5978/348995/9972/23225/6125/55746/53371/23511/60559/9631/64710/9830/8664/5430/5725/6194/5903/440275/5431/904/6230/23165/4736/6135/6191/6598/25920/6667/5440/6202/6129/905/6229/6206/6207/6741/6222/6189/6164/6175/6218/6133/6227/6155/6122/6144/6154/3725	56
BP	GO:0018022	peptidyl-lysine methylation	43/2329	132/18866	9.10251e-10	7.21972e-08	6.17256e-08	4602/3720/83852/79723/55870/9739/8473/11091/23028/55183/200424/2146/29072/11137/64324/54880/4297/80335/22823/23168/23512/23067/55677/55170/23411/1789/58508/1499/8085/6598/546/55904/23170/90780/672/5926/7468/55209/2672/1786/9646/84444/7552	43
BP	GO:0006473	protein acetylation	57/2329	203/18866	1.18528e-09	9.27904e-08	7.93318e-08	54107/2033/8295/3054/10847/10664/60560/117143/6659/9329/8473/11091/80018/23326/23522/26009/8861/6418/23741/80155/6880/1386/4297/8089/55274/9913/55167/79075/9767/84656/55677/23411/57551/8202/1654/6872/23774/79829/9643/2648/6598/55683/79612/675/51126/7862/9678/90780/2624/672/55689/408/86/55209/6879/8986/1111	57
BP	GO:0034470	ncRNA processing	92/2329	400/18866	1.65935e-09	1.28238e-07	1.09638e-07	9221/23160/51575/9188/8602/84128/79979/79707/23076/27292/57508/1736/55127/25896/64216/27340/134430/54881/118460/51602/83732/55226/9875/1653/6894/9790/51729/6125/23404/55720/22984/55623/54482/10521/79954/81556/5073/25926/158234/54901/221078/10785/127253/153443/116461/8575/57050/8518/55006/142940/6194/80135/84365/22803/54517/9724/23517/28987/4736/6135/3181/65083/54680/23195/54931/26523/203522/65008…	92
BP	GO:0016573	histone acetylation	48/2329	159/18866	1.76974e-09	1.35038e-07	1.15452e-07	54107/2033/8295/3054/10847/10664/117143/9329/8473/11091/23326/23522/26009/8861/6418/23741/6880/1386/4297/8089/55274/9913/55167/9767/84656/55677/23411/8202/6872/23774/79829/9643/2648/6598/55683/675/7862/9678/90780/2624/672/55689/408/86/55209/6879/8986/1111	48
BP	GO:0033260	nuclear DNA replication	26/2329	60/18866	2.11575e-09	1.59422e-07	1.36299e-07	54107/79915/5111/4172/54617/5422/5983/8317/4173/4171/2237/5557/4175/9837/5985/5427/1763/546/4176/675/6117/8318/81620/51053/4174/5426	26
BP	GO:0051568	histone H3-K4 methylation	25/2329	57/18866	3.17168e-09	2.36036e-07	2.018e-07	4602/55870/9739/8473/11091/23028/200424/54880/4297/80335/23168/23067/55170/1789/58508/1499/8085/55904/90780/672/5926/2672/1786/9646/7552	25
BP	GO:0044786	cell cycle DNA replication	27/2329	65/18866	3.23689e-09	2.37951e-07	2.03438e-07	54107/79915/5111/4172/54617/5422/5983/8317/4173/4171/2237/5557/4175/9837/5985/5427/1763/546/4176/675/6117/8318/79733/81620/51053/4174/5426	27
BP	GO:0007051	spindle organization	52/2329	183/18866	3.98629e-09	2.8951e-07	2.47519e-07	9126/8243/203068/54617/3832/55835/22919/4733/3192/23172/9793/9897/10464/387/3796/4627/54801/55125/55726/4292/440145/114791/1104/3619/22974/546/6491/9611/259266/126731/23122/29127/51119/10735/6683/115106/3925/1062/1778/7272/64946/24137/10982/4605/3833/140609/10783/891/9055/2770/10615/991	52
BP	GO:0000380	alternative mRNA splicing, via spliceosome	32/2329	87/18866	4.4428e-09	3.18824e-07	2.72581e-07	10657/6431/6426/9967/1660/5978/10658/23028/58517/27316/6421/3192/10521/29890/6432/6427/4154/5725/51341/10772/80004/1655/1859/140890/64783/6430/8621/3178/6434/10150/10659/10929	32
BP	GO:0051225	spindle assembly	38/2329	115/18866	5.44325e-09	3.78541e-07	3.23637e-07	9126/8243/203068/54617/3832/22919/4733/3192/23172/9897/10464/387/3796/54801/55125/4292/440145/114791/1104/3619/22974/9611/259266/126731/23122/29127/10735/115106/1778/24137/10982/4605/3833/140609/10783/9055/10615/991	38
BP	GO:0018393	internal peptidyl-lysine acetylation	48/2329	164/18866	5.46364e-09	3.78541e-07	3.23637e-07	54107/2033/8295/3054/10847/10664/117143/9329/8473/11091/23326/23522/26009/8861/6418/23741/6880/1386/4297/8089/55274/9913/55167/9767/84656/55677/23411/8202/6872/23774/79829/9643/2648/6598/55683/675/7862/9678/90780/2624/672/55689/408/86/55209/6879/8986/1111	48
BP	GO:1902275	regulation of chromatin organization	54/2329	195/18866	5.49268e-09	3.78541e-07	3.23637e-07	4602/3720/10664/83852/29028/9739/8473/11091/23028/10270/55183/94104/6418/7157/23741/3192/64324/54880/4297/22823/25842/3159/23168/84656/55677/55170/23411/1789/4288/1499/79829/2648/54737/6598/546/55904/10155/54454/90780/8318/23272/2624/672/408/55209/6749/6879/2672/1786/9646/8986/1111/891/8971	54
BP	GO:0071824	protein-DNA complex subunit organization	70/2329	282/18866	5.52615e-09	3.78541e-07	3.23637e-07	8289/54107/6599/9557/10847/6882/10664/55814/6908/4172/11198/54617/55320/10541/23522/5893/7259/6418/7157/6666/29072/2967/4173/23270/54700/81611/50809/25842/4171/3159/8467/2186/4175/142/79682/196528/4609/10036/54069/6601/11339/3070/6872/55166/23126/7507/1060/6598/546/5925/4176/5757/8294/5928/6117/8318/3014/81620/6879/64105/4869/1062/51053/4174/57082/64946/1063/8364/55355/8971	70
BP	GO:0006446	regulation of translational initiation	30/2329	79/18866	5.61955e-09	3.80614e-07	3.25409e-07	10657/23367/54915/4686/51441/1979/1967/9669/54505/2733/1653/1982/4528/22916/1974/1975/468/127933/440275/1981/84919/1654/2475/8672/253943/3646/55364/1983/4869/1978	30
BP	GO:0006475	internal protein amino acid acetylation	48/2329	166/18866	8.4257e-09	5.58133e-07	4.7718e-07	54107/2033/8295/3054/10847/10664/117143/9329/8473/11091/23326/23522/26009/8861/6418/23741/6880/1386/4297/8089/55274/9913/55167/9767/84656/55677/23411/8202/6872/23774/79829/9643/2648/6598/55683/675/7862/9678/90780/2624/672/55689/408/86/55209/6879/8986/1111	48
BP	GO:0007093	mitotic cell cycle checkpoint	48/2329	166/18866	8.4257e-09	5.58133e-07	4.7718e-07	2033/7155/6659/55571/55159/5111/57472/4436/9125/4361/11073/5884/7157/835/1386/9183/57551/63967/701/4194/51499/4998/55055/348654/7153/5925/9735/51347/90381/11130/5325/79733/672/81620/9656/1869/699/7027/7272/5591/4683/1063/983/7029/891/6154/28984/991	48
BP	GO:0018394	peptidyl-lysine acetylation	49/2329	172/18866	1.01156e-08	6.62792e-07	5.66659e-07	54107/2033/8295/3054/10847/10664/117143/6659/9329/8473/11091/23326/23522/26009/8861/6418/23741/6880/1386/4297/8089/55274/9913/55167/9767/84656/55677/23411/8202/6872/23774/79829/9643/2648/6598/55683/675/7862/9678/90780/2624/672/55689/408/86/55209/6879/8986/1111	49
BP	GO:2001020	regulation of response to DNA damage stimulus	59/2329	226/18866	1.21753e-08	7.89169e-07	6.74706e-07	79915/5429/1660/55159/5111/407006/23028/55183/5893/7913/25/7157/29072/79184/6880/9774/54465/54537/56897/10116/23049/165918/7398/142/10721/196528/4609/23411/51616/63979/10635/1054/51499/1655/55719/10097/56893/3190/1859/4170/8914/10155/754/80311/3014/672/2305/79968/7468/23201/64110/126549/596/151636/1111/5366/5591/6154/6387	59
BP	GO:0043414	macromolecule methylation	75/2329	318/18866	1.71626e-08	1.10059e-06	9.40962e-07	4602/3720/10664/83852/23091/79723/79979/27292/55870/9739/8473/64216/11091/96764/23028/55183/94104/200424/2146/6894/29072/11137/64324/54880/4297/54482/80335/22823/23168/23512/23067/142/55677/4609/158234/55170/23411/29890/221078/10785/1789/127253/54069/58508/55006/3070/6628/1499/8085/55251/23463/54737/6598/54931/546/55904/221656/64783/23170/10155/90780/672/5926/7468/55209/51574/6304/7490/2672/1786/…	75
BP	GO:0009411	response to UV	42/2329	140/18866	2.19995e-08	1.39592e-06	1.19346e-06	2033/5429/5111/4436/7528/54617/23028/7486/2956/7157/56852/2237/7398/847/142/4609/23411/468/440275/22890/6872/51499/836/7507/8491/163859/51514/675/51455/55364/993/201973/4869/3150/596/9768/1111/4734/6154/94241/5295/1991	42
BP	GO:0006270	DNA replication initiation	19/2329	39/18866	2.99703e-08	1.88188e-06	1.60893e-06	54107/4172/11073/5422/4173/56897/4171/5557/4175/5427/4998/4176/90381/8318/81620/55388/4174/4683/5426	19
BP	GO:0019083	viral transcription	49/2329	178/18866	3.38884e-08	2.10597e-06	1.80052e-06	2033/55706/6882/23279/1660/23076/5978/348995/9972/23225/6125/55746/53371/23511/9631/64710/9830/5430/6194/5903/5431/904/6230/23165/4736/6135/6191/6598/25920/6667/5440/6202/6129/905/6229/6206/6207/6222/6189/6164/6175/6218/6133/6227/6155/6122/6144/6154/3725	49
BP	GO:0031060	regulation of histone methylation	26/2329	67/18866	3.42576e-08	2.10719e-06	1.80156e-06	4602/3720/10664/8473/11091/23028/55183/94104/64324/54880/4297/22823/23168/55677/55170/23411/1789/1499/6598/546/55904/90780/672/2672/1786/9646	26
BP	GO:0007062	sister chromatid cohesion	25/2329	63/18866	3.70393e-08	2.25528e-06	1.92817e-06	23244/9126/10664/8243/23137/4361/6421/2237/79075/11331/440081/701/1499/55719/23126/442582/546/5925/151246/5885/11044/10735/699/113130/991	25
BP	GO:0044774	mitotic DNA integrity checkpoint	35/2329	108/18866	3.77268e-08	2.27417e-06	1.94432e-06	2033/7155/6659/55571/55159/5111/57472/4436/9125/4361/11073/5884/7157/835/1386/57551/63967/4194/51499/4998/7153/51347/90381/5325/79733/9656/1869/7027/5591/4683/983/7029/891/6154/28984	35
BP	GO:0045815	positive regulation of gene expression, epigenetic	24/2329	59/18866	3.91798e-08	2.33838e-06	1.99921e-06	8289/2033/9188/9031/6908/29028/25885/7913/221830/55038/9792/57492/84172/25842/3159/8467/57178/1499/2648/5440/54454/1111/23451/8971	24
BP	GO:0044839	cell cycle G2/M phase transition	66/2329	273/18866	4.48088e-08	2.64811e-06	2.26402e-06	55920/10657/79915/7532/11064/10776/6502/203068/4361/10270/11073/9113/5884/7157/55835/22919/7531/80184/8317/79184/6873/9793/8454/23291/22995/54801/57551/55125/63967/5684/9702/4998/5695/890/51514/22974/84930/51347/10733/5885/10383/9662/10142/90381/9928/10806/993/5707/672/9833/2305/1781/5108/115106/4957/4869/3320/1778/80321/1111/3161/4683/1063/983/9133/891	66
BP	GO:0022616	DNA strand elongation	15/2329	26/18866	4.57664e-08	2.67845e-06	2.28996e-06	54107/5111/4172/4361/5422/10111/5983/4173/64710/9837/1763/4176/51659/4683/5426	15
BP	GO:0040029	regulation of gene expression, epigenetic	54/2329	209/18866	7.24505e-08	4.19934e-06	3.59026e-06	8289/2033/3720/9188/9031/10664/6908/29028/55183/25885/7913/221830/2146/55038/9792/3192/57492/84172/22823/25842/3159/23512/8467/11146/57178/23411/29890/1789/58487/1499/8085/9643/2648/54737/648/5440/8294/221656/64783/5928/54454/8318/3014/23272/672/5926/51132/1786/84444/1111/23451/8364/8971/7503	54
BP	GO:0043543	protein acylation	61/2329	248/18866	7.41101e-08	4.25462e-06	3.63752e-06	54107/2033/8295/3054/10847/10664/60560/117143/6659/9329/340481/8473/11091/80018/23326/23522/26009/8861/6418/23741/80155/6880/1386/4297/8089/55274/9913/55167/79075/9767/84656/55677/23411/57551/51104/8202/25921/1654/6872/23774/79829/9643/2648/6598/55683/79612/675/51126/7862/9678/90780/2624/672/55689/408/86/55209/51114/6879/8986/1111	61
BP	GO:0032259	methylation	82/2329	371/18866	8.16924e-08	4.64568e-06	3.97186e-06	4602/4144/3720/10664/83852/23091/79723/79979/27292/4548/55870/9739/8473/64216/11091/96764/23028/55183/94104/138199/200424/2146/6894/29072/11137/64324/54880/4297/54482/80335/22823/23168/23512/23067/142/55677/4609/158234/55170/23411/29890/221078/10785/1789/127253/54069/58508/55006/3070/6628/1499/8085/25840/55251/7298/23463/54737/6598/54931/546/55904/221656/64783/23170/10155/191/90780/672/5926/7468/…	82
BP	GO:0051028	mRNA transport	43/2329	152/18866	9.87059e-08	5.56074e-06	4.7542e-06	6431/65109/6426/26019/55706/4686/23279/1660/84271/7884/10128/348995/9972/23225/2733/29072/55746/53371/23511/9631/57187/7514/23049/8570/51692/22916/55677/29890/6432/6427/5903/9295/23165/3181/10644/6430/84248/9908/55916/10250/3178/23299/3087	43
BP	GO:0051983	regulation of chromosome segregation	34/2329	107/18866	1.01032e-07	5.63906e-06	4.82116e-06	55920/9698/23369/10664/1457/23137/6421/3192/8697/56852/2237/9183/8881/701/4288/1499/348654/55719/546/5925/5885/81620/29127/1062/1778/699/7272/11004/1063/113130/10783/891/10615/991	34
BP	GO:0006479	protein methylation	49/2329	184/18866	1.05216e-07	5.76584e-06	4.92955e-06	4602/3720/10664/83852/79723/55870/9739/8473/11091/23028/55183/94104/200424/2146/29072/11137/64324/54880/4297/80335/22823/23168/23512/23067/55677/55170/23411/1789/58508/6628/1499/8085/55251/23463/6598/546/55904/23170/90780/672/5926/7468/55209/6304/2672/1786/9646/84444/7552	49
BP	GO:0008213	protein alkylation	49/2329	184/18866	1.05216e-07	5.76584e-06	4.92955e-06	4602/3720/10664/83852/79723/55870/9739/8473/11091/23028/55183/94104/200424/2146/29072/11137/64324/54880/4297/80335/22823/23168/23512/23067/55677/55170/23411/1789/58508/6628/1499/8085/55251/23463/6598/546/55904/23170/90780/672/5926/7468/55209/6304/2672/1786/9646/84444/7552	49
BP	GO:0032204	regulation of telomere maintenance	28/2329	80/18866	1.38034e-07	7.4961e-06	6.40885e-06	54552/1736/80351/10694/4361/26354/55226/10111/10575/3192/10576/908/23049/5073/142/4609/7520/56252/1499/10574/3181/546/79618/7203/3178/79991/4683/140609	28
BP	GO:0000381	regulation of alternative mRNA splicing, via spliceosome	27/2329	76/18866	1.61822e-07	8.7095e-06	7.44625e-06	10657/6431/6426/9967/5978/10658/58517/27316/3192/10521/29890/6432/6427/4154/5725/51341/10772/1655/1859/140890/64783/6430/3178/6434/10150/10659/10929	27
BP	GO:0043044	ATP-dependent chromatin remodeling	30/2329	90/18866	1.72896e-07	9.22316e-06	7.88541e-06	8289/55193/6599/10847/56916/54617/55320/6595/1108/57492/81611/8467/79682/54069/6601/11339/55166/1060/6598/5757/8294/5928/57459/86/64105/4869/57082/64946/8364/55355	30
BP	GO:0002244	hematopoietic progenitor cell differentiation	46/2329	172/18866	2.23099e-07	1.17968e-05	1.00858e-05	4602/1021/6659/51441/9739/5978/55326/23215/2322/6654/1938/3815/23376/6938/25/8861/7157/4297/3313/7520/861/4005/865/5684/22890/54517/23094/5695/7153/2624/5707/51119/167153/11051/54443/5341/103/596/55526/5591/6722/85439/4851/3214/3213/1436	46
BP	GO:0072401	signal transduction involved in DNA integrity checkpoint	26/2329	73/18866	2.57746e-07	1.33939e-05	1.14512e-05	2033/6659/55571/5111/57472/9125/7157/835/27339/79184/988/4194/51499/51514/5325/79733/672/1869/7027/1111/5591/983/7029/891/6154/28984	26
BP	GO:0072422	signal transduction involved in DNA damage checkpoint	26/2329	73/18866	2.57746e-07	1.33939e-05	1.14512e-05	2033/6659/55571/5111/57472/9125/7157/835/27339/79184/988/4194/51499/51514/5325/79733/672/1869/7027/1111/5591/983/7029/891/6154/28984	26
BP	GO:1902749	regulation of cell cycle G2/M phase transition	54/2329	217/18866	2.72613e-07	1.39878e-05	1.1959e-05	55920/79915/7532/11064/203068/4361/11073/5884/7157/55835/22919/7531/80184/8317/79184/9793/8454/22995/54801/57551/55125/63967/5684/9702/4998/5695/51514/22974/51347/10733/5885/10383/9662/10142/90381/9928/10806/993/5707/672/1781/5108/115106/4957/4869/3320/1778/80321/1111/3161/4683/1063/983/891	54
BP	GO:0006354	DNA-templated transcription, elongation	35/2329	116/18866	2.73817e-07	1.39878e-05	1.1959e-05	27336/23160/123169/4686/22828/6908/11198/55840/25885/221830/8861/2146/29072/2967/10771/3192/284695/84172/10915/23168/165918/22916/55677/5430/5431/904/27125/25920/5440/8621/905/55209/6749/3150/9646	35
BP	GO:0007004	telomere maintenance via telomerase	25/2329	69/18866	2.98792e-07	1.50093e-05	1.28323e-05	54552/1736/80351/10694/4361/55226/10111/10575/3192/10576/908/5073/7520/3326/1499/10574/10728/6117/79618/7203/3178/54433/3320/79991/140609	25
BP	GO:2000573	positive regulation of DNA biosynthetic process	25/2329	69/18866	2.98792e-07	1.50093e-05	1.28323e-05	5111/11232/1736/80351/10694/5983/10575/10576/908/5073/79075/4609/5985/7520/3326/1499/10574/3181/10728/79618/7203/3178/3320/140609/28984	25
BP	GO:0051569	regulation of histone H3-K4 methylation	15/2329	29/18866	3.19113e-07	1.58976e-05	1.35918e-05	4602/11091/23028/54880/4297/23168/55170/1789/1499/55904/90780/672/2672/1786/9646	15
BP	GO:0072395	signal transduction involved in cell cycle checkpoint	26/2329	74/18866	3.50979e-07	1.73418e-05	1.48265e-05	2033/6659/55571/5111/57472/9125/7157/835/27339/79184/988/4194/51499/51514/5325/79733/672/1869/7027/1111/5591/983/7029/891/6154/28984	26
BP	GO:2001251	negative regulation of chromosome organization	41/2329	148/18866	3.60586e-07	1.76716e-05	1.51085e-05	54552/3720/29028/80351/11091/23028/55226/6418/10111/3192/54880/22823/25842/4171/3159/9183/142/55170/23411/1789/7520/701/348654/7153/6598/546/5885/54454/672/81620/3178/6879/1786/699/79991/7272/4683/1063/891/991/8971	41
BP	GO:0042770	signal transduction in response to DNA damage	38/2329	133/18866	4.07104e-07	1.97905e-05	1.692e-05	79915/2033/6659/55571/5111/57472/23028/9125/25/7157/835/27339/79184/23411/988/4194/51499/1655/51514/546/1859/675/754/5325/79733/672/2305/1869/7027/1111/5366/5591/4683/983/7029/891/6154/28984	38
BP	GO:0000086	G2/M transition of mitotic cell cycle	60/2329	254/18866	4.23676e-07	2.04275e-05	1.74646e-05	55920/10657/7532/11064/10776/6502/203068/4361/11073/9113/5884/55835/22919/7531/80184/8317/6873/9793/8454/23291/22995/54801/57551/55125/63967/5684/9702/4998/5695/890/51514/22974/84930/51347/10733/5885/10383/9662/10142/90381/9928/10806/993/5707/672/9833/2305/1781/5108/115106/4957/3320/1778/80321/3161/4683/1063/983/9133/891	60
BP	GO:0045292	mRNA cis splicing, via spliceosome	22/2329	57/18866	4.28992e-07	2.04275e-05	1.74646e-05	6431/6426/4686/101954264/51729/101954272/100151683/11193/22916/6432/6427/10772/11168/55660/101954277/55015/26824/6631/6430/23020/10929/101954267	22
BP	GO:0006406	mRNA export from nucleus	34/2329	113/18866	4.33763e-07	2.04275e-05	1.74646e-05	6431/65109/6426/26019/55706/4686/23279/84271/7884/348995/9972/23225/2733/29072/55746/53371/23511/9631/57187/23049/51692/22916/55677/29890/6432/6427/5903/9295/23165/3181/6430/84248/10250/3087	34
BP	GO:0071427	mRNA-containing ribonucleoprotein complex export from nucleus	34/2329	113/18866	4.33763e-07	2.04275e-05	1.74646e-05	6431/65109/6426/26019/55706/4686/23279/84271/7884/348995/9972/23225/2733/29072/55746/53371/23511/9631/57187/23049/51692/22916/55677/29890/6432/6427/5903/9295/23165/3181/6430/84248/10250/3087	34
BP	GO:0098781	ncRNA transcription	33/2329	109/18866	5.44878e-07	2.54615e-05	2.17685e-05	10927/23248/6882/4686/6908/9329/57508/25896/7157/11137/23379/6880/84172/4691/81556/25926/22916/112495/9330/5430/55726/84365/5431/904/6598/2475/6667/5440/2971/905/5451/51574/10208	33
BP	GO:0010833	telomere maintenance via telomere lengthening	27/2329	81/18866	7.0442e-07	3.26634e-05	2.79259e-05	54552/1736/80351/10694/4361/55226/10111/10575/3192/10576/908/5073/142/7520/3326/1499/10574/3181/10728/6117/79618/7203/3178/54433/3320/79991/140609	27
BP	GO:0045931	positive regulation of mitotic cell cycle	44/2329	168/18866	7.60216e-07	3.49816e-05	2.99077e-05	693175/55920/328/5781/26057/55023/407006/23137/23326/25/26073/9585/8317/3192/8697/8881/11331/407007/1981/1654/4041/348654/55719/1845/51514/5925/675/55904/3643/51203/894/8318/993/5586/81620/6868/7027/983/113130/1978/891/255324/28984/301	44
BP	GO:0044773	mitotic DNA damage checkpoint	31/2329	101/18866	8.55116e-07	3.90503e-05	3.33864e-05	2033/6659/55571/55159/5111/57472/4436/9125/4361/11073/7157/835/1386/57551/63967/4194/51499/51347/90381/5325/79733/9656/1869/7027/5591/4683/983/7029/891/6154/28984	31
BP	GO:1903313	positive regulation of mRNA metabolic process	27/2329	82/18866	9.27613e-07	4.20425e-05	3.59445e-05	9698/123169/54915/4686/678/51441/9967/9475/26986/27316/10262/27339/4691/87178/8570/22916/149041/27327/253943/29896/23112/10236/6434/11051/3312/6093/891	27
BP	GO:0031123	RNA 3'-end processing	41/2329	153/18866	9.39116e-07	4.22462e-05	3.61187e-05	6431/11052/23248/65109/6426/123169/4686/22828/57508/84271/1736/7884/25896/10768/118460/26986/23404/87178/57187/81556/5073/51692/22916/6432/6427/904/9295/54931/203522/6430/11044/10250/167153/51574/56915/11051/6741/9646/6626/6227/891	41
BP	GO:0000727	double-strand break repair via break-induced replication	9/2329	12/18866	1.01681e-06	4.50685e-05	3.85316e-05	4172/8317/4173/4171/4175/4176/8318/51659/4174	9
BP	GO:1904816	positive regulation of protein localization to chromosome, telomeric region	9/2329	12/18866	1.01681e-06	4.50685e-05	3.85316e-05	54552/1736/10694/26354/10575/10576/908/10574/7203	9
BP	GO:0097193	intrinsic apoptotic signaling pathway	65/2329	290/18866	1.0492e-06	4.61648e-05	3.94689e-05	79915/2033/10059/8065/4436/9529/23028/2956/5326/4841/25/8725/7157/6421/835/599/6880/9774/54700/8454/3094/204851/142/7159/23411/51616/63979/8575/468/3708/3301/10955/4292/1654/51499/6135/836/1655/10550/7507/10210/3190/675/4976/4170/754/79073/672/9833/84447/1869/596/55486/2023/5366/5591/4683/10525/3717/489/4217/10105/6154/5295/6387	65
BP	GO:0032206	positive regulation of telomere maintenance	20/2329	51/18866	1.06009e-06	4.6306e-05	3.95897e-05	1736/80351/10694/4361/26354/10111/10575/10576/908/5073/7520/1499/10574/3181/546/79618/7203/3178/4683/140609	20
BP	GO:0006275	regulation of DNA replication	33/2329	112/18866	1.07996e-06	4.68346e-05	4.00416e-05	23244/79915/9126/26057/1660/5111/11232/54617/55704/5884/7157/5983/8317/56897/64710/79075/5985/1763/890/546/5930/675/90381/8914/79733/81620/30968/91607/51053/79991/4683/983/3725	33
BP	GO:0002183	cytoplasmic translational initiation	16/2329	35/18866	1.10745e-06	4.76838e-05	4.07676e-05	8661/1968/8562/51441/8894/8669/54505/8664/1974/8668/1975/1981/2475/3646/1983/1978	16
BP	GO:1902850	microtubule cytoskeleton organization involved in mitosis	39/2329	144/18866	1.28421e-06	5.49024e-05	4.69392e-05	9126/8243/3832/29072/4733/3192/23172/9793/10464/23291/387/3796/9183/55125/55726/440145/1104/22974/6491/51203/126731/23122/29127/51119/10735/6683/3925/1062/1778/7272/64946/24137/4605/3833/10253/891/9055/2770/991	39
BP	GO:0007052	mitotic spindle organization	34/2329	118/18866	1.31651e-06	5.58869e-05	4.77809e-05	9126/8243/3832/4733/3192/23172/9793/10464/387/3796/55125/55726/440145/1104/22974/6491/126731/23122/29127/51119/10735/6683/3925/1062/1778/7272/64946/24137/4605/3833/891/9055/2770/991	34
BP	GO:0010389	regulation of G2/M transition of mitotic cell cycle	49/2329	200/18866	1.55222e-06	6.54321e-05	5.59417e-05	55920/7532/11064/203068/4361/11073/5884/55835/22919/7531/80184/8317/9793/8454/22995/54801/57551/55125/63967/5684/9702/4998/5695/51514/22974/51347/10733/5885/10383/9662/10142/90381/9928/10806/993/5707/672/1781/5108/115106/4957/3320/1778/80321/3161/4683/1063/983/891	49
BP	GO:0043967	histone H4 acetylation	24/2329	70/18866	1.62801e-06	6.81502e-05	5.82655e-05	2033/8295/3054/8473/11091/23326/23522/26009/4297/8089/55167/9767/55677/23411/79829/9643/2648/6598/55683/675/672/408/86/6879	24
BP	GO:2000278	regulation of DNA biosynthetic process	32/2329	109/18866	1.70582e-06	7.07178e-05	6.04607e-05	54552/5111/11232/1736/80351/10694/55226/7157/5983/10575/3192/10576/908/5073/79075/4609/5985/7520/3326/1499/10574/3181/143/10728/79618/7203/3178/3320/7027/79991/140609/28984	32
BP	GO:0043487	regulation of RNA stability	48/2329	195/18866	1.71281e-06	7.07178e-05	6.04607e-05	9698/23367/328/10492/55802/23369/54915/678/51441/9967/1660/1736/9475/118460/79675/26986/6418/3192/23404/7529/201626/7514/55603/8570/5073/10949/60493/149041/1981/5684/4904/5695/2475/26135/253943/54542/10644/5707/11044/25819/10236/167153/4869/3842/56915/1869/3312/6093	48
BP	GO:0009124	nucleoside monophosphate biosynthetic process	18/2329	44/18866	1.76464e-06	7.23622e-05	6.18666e-05	10606/5634/3615/51727/1633/3251/5471/2618/790/5198/7298/159/5631/1635/7083/7371/132/100	18
BP	GO:0006278	RNA-dependent DNA biosynthetic process	25/2329	76/18866	2.37107e-06	9.65731e-05	8.25659e-05	54552/1736/80351/10694/4361/55226/10111/10575/3192/10576/908/5073/7520/3326/1499/10574/10728/6117/79618/7203/3178/54433/3320/79991/140609	25
BP	GO:0043488	regulation of mRNA stability	46/2329	186/18866	2.43293e-06	9.84275e-05	8.41513e-05	9698/23367/328/10492/55802/23369/54915/678/51441/9967/1660/9475/118460/79675/26986/6418/3192/23404/7529/201626/7514/55603/8570/5073/10949/60493/149041/1981/5684/4904/5695/2475/26135/253943/54542/10644/5707/11044/25819/10236/4869/3842/56915/1869/3312/6093	46
BP	GO:0032386	regulation of intracellular transport	75/2329	358/18866	2.49878e-06	0.000100418	8.58528e-05	10657/64328/10971/57506/11052/5781/9221/7532/64062/1660/3799/10541/9972/51569/51496/3998/10427/11236/7157/29072/9585/7531/80184/23379/4478/7529/3843/53371/7327/9777/6845/57187/9695/7514/27248/51465/22916/55677/7159/54741/7533/127933/3326/57510/8898/55754/25930/23317/6721/9530/10075/64801/10155/23209/89781/392/3728/5108/9847/5621/284/79752/1778/1869/596/7027/55486/5366/7295/4734/983/3717/7029/1061…	75
BP	GO:0030518	intracellular steroid hormone receptor signaling pathway	33/2329	116/18866	2.55508e-06	0.000102	8.72057e-05	8289/2033/6502/5469/9125/811/9113/23376/51569/7337/8031/387/10521/57178/142/11331/29966/23411/7533/861/51341/865/6049/8085/1655/9611/7110/672/6879/55809/2908/4734/3717	33
BP	GO:0006282	regulation of DNA repair	36/2329	132/18866	2.7141e-06	0.000107635	9.20237e-05	5429/1660/5111/407006/23028/55183/5893/7913/29072/79184/54537/56897/165918/7398/142/10721/196528/23411/63979/10635/1054/55719/10097/56893/8914/10155/80311/3014/672/2305/7468/23201/64110/151636/1111/5591	36
BP	GO:0051031	tRNA transport	16/2329	37/18866	2.75432e-06	0.000108517	9.27771e-05	55706/9804/23279/348995/9972/23225/11260/55746/53371/23511/9631/5903/4904/23165/65083/6741	16
BP	GO:0006271	DNA strand elongation involved in DNA replication	11/2329	19/18866	2.89556e-06	0.00011334	9.69013e-05	54107/5111/4172/5422/5983/4173/9837/1763/4176/51659/5426	11
BP	GO:0000387	spliceosomal snRNP assembly	20/2329	54/18866	3.04039e-06	0.000118242	0.000101092	11171/24148/96764/27339/26830/25929/100151683/10594/1207/8161/10772/6628/26828/6631/6635/57819/26831/50628/26829/6633	20
BP	GO:0007076	mitotic chromosome condensation	10/2329	16/18866	3.18381e-06	0.000122959	0.000105125	10592/10270/9918/10051/23310/51203/11044/64151/23397/113130	10
BP	GO:0031056	regulation of histone modification	39/2329	149/18866	3.2092e-06	0.000122959	0.000105125	4602/3720/10664/8473/11091/23028/10270/55183/94104/6418/7157/23741/64324/54880/4297/22823/23168/84656/55677/55170/23411/1789/1499/2648/6598/546/55904/90780/2624/672/408/55209/6879/2672/1786/9646/8986/1111/891	39
BP	GO:0051170	import into nucleus	43/2329	171/18866	3.22289e-06	0.000122959	0.000105125	10527/23633/1434/57506/26060/9221/3839/5469/9972/51569/7157/55746/26953/3843/53371/23511/9631/55705/25929/3841/11331/3838/3326/5903/6628/6635/23534/1871/30000/10155/754/55916/50628/5530/6850/3178/3728/3842/284/983/3717/6633/5295	43
BP	GO:0046822	regulation of nucleocytoplasmic transport	32/2329	112/18866	3.25628e-06	0.000123452	0.000105546	10657/64328/57506/11052/5781/9221/64062/1660/10541/9972/51569/51496/7157/29072/7531/3843/53371/57187/7514/22916/55677/127933/3326/57510/10155/3728/284/7295/4734/983/3717/5295	32
BP	GO:0006323	DNA packaging	55/2329	240/18866	3.40354e-06	0.000128228	0.00010963	54107/10664/83852/55320/10541/10592/10270/23522/7259/6418/7157/23270/50809/25842/4171/3159/9918/8467/79682/22893/23411/10036/54069/11339/10051/3070/55166/79829/3619/7153/54737/1060/546/23310/8294/5928/10155/51203/3014/23272/11044/64151/64105/4869/54892/1786/57082/64946/23397/983/113130/8364/55355/891/8971	55
BP	GO:0010212	response to ionizing radiation	38/2329	144/18866	3.45602e-06	0.000129397	0.000110629	55159/25896/4436/54617/23028/7486/11073/7516/7157/79184/1958/64710/6240/165918/142/4609/23411/1789/63979/7520/10635/836/2547/64421/675/90381/10276/79073/8438/3014/672/867/596/3309/5591/6770/6154/301	38
BP	GO:0070198	protein localization to chromosome, telomeric region	14/2329	30/18866	3.85975e-06	0.000143621	0.00012279	54552/1736/80351/10694/26354/1200/10575/10576/908/7520/10574/546/675/7203	14
BP	GO:0090305	nucleic acid phosphodiester bond hydrolysis	67/2329	313/18866	3.9349e-06	0.000145519	0.000124412	328/11052/79915/9557/55802/8602/4686/115752/5111/79707/255967/55728/57472/7247/27340/7486/4361/10146/118460/1653/1676/10111/9790/5983/2967/55629/23404/55720/87178/201626/2237/5073/142/51692/10721/22916/5985/116461/81691/22803/5980/28987/836/348654/1763/7507/22909/26523/64421/23357/6117/25819/57523/27044/56915/11051/91607/85463/92667/126549/143689/23405/6227/5426/25939/6036/6037	67
BP	GO:1903829	positive regulation of cellular protein localization	71/2329	338/18866	4.15284e-06	0.000152642	0.000130503	54552/64328/10971/57506/7532/3799/1736/10541/10694/26354/9475/55704/51496/7157/9585/7531/10575/80184/23379/4478/22841/7529/10576/3843/9777/908/9695/163/142/163882/6526/7159/54741/7533/3326/51104/5584/51068/25921/23607/55166/10574/55754/6721/10075/84687/10155/89781/7203/493/81620/382/3728/5108/9847/51574/5621/79752/1869/596/7027/7037/151636/5366/4130/983/3717/7029/2770/6711/5295	71
BP	GO:0097064	ncRNA export from nucleus	16/2329	38/18866	4.21345e-06	0.000153931	0.000131605	55706/23279/348995/9972/23225/11260/55746/53371/23511/9631/22916/5903/23165/65083/4869/6741	16
BP	GO:0002181	cytoplasmic translation	30/2329	103/18866	4.2522e-06	0.000154411	0.000132015	8661/1968/8562/51441/1660/55854/8894/1938/8669/54505/7555/4733/85451/8664/1974/8668/1975/1981/4736/6135/2475/3646/220717/1983/16/6175/6133/1978/6227/6154	30
BP	GO:0065004	protein-DNA complex assembly	55/2329	243/18866	5.05746e-06	0.000182459	0.000155994	9557/6882/55814/6908/4172/55320/10541/23522/5893/7259/6418/7157/6666/2967/4173/23270/54700/50809/25842/4171/8467/4175/142/79682/10036/54069/11339/3070/6872/55166/23126/7507/1060/6598/546/5925/4176/8294/5928/6117/8318/3014/81620/6879/64105/4869/1062/51053/4174/57082/64946/1063/8364/55355/8971	55
BP	GO:0061013	regulation of mRNA catabolic process	49/2329	208/18866	5.08511e-06	0.000182459	0.000155994	9698/23367/328/10492/55802/23369/54915/678/51441/9967/1660/9475/118460/79675/26986/6418/3192/23404/7529/87178/201626/7514/55603/8570/5073/10949/60493/149041/1981/5684/4904/27327/5695/2475/26135/253943/54542/10644/5707/11044/25819/23112/10236/4869/3842/56915/1869/3312/6093	49
BP	GO:0042113	B cell activation	69/2329	328/18866	5.35195e-06	0.000190054	0.000162488	200081/79915/2033/678/9730/4436/2322/2956/55183/3815/118460/25/7157/54537/3676/7374/165918/11331/3476/51341/149041/1054/4292/22890/57181/836/1316/359948/3071/952/64421/3543/84447/6850/7468/139818/196/6868/596/7037/3087/5579/5591/3329/4683/100/9466/202309/4064/4208/9452/4773/3493/28388/5295/8660/28394/28467/28442/3501/28392/28448/28468/3503/28408/28444/28450/28423/3502	69
BP	GO:0007088	regulation of mitotic nuclear division	41/2329	163/18866	5.35986e-06	0.000190054	0.000162488	64793/55023/23137/3832/9585/4733/3192/8697/9183/8881/11331/8556/9820/701/4041/4288/1104/348654/55719/546/5925/9735/5885/3643/84687/8621/51203/126731/81620/54443/1062/699/7272/1111/1063/113130/10783/891/255324/28984/991	41
BP	GO:0090307	mitotic spindle assembly	22/2329	65/18866	5.57184e-06	0.000196416	0.000167927	9126/8243/3832/4733/3192/23172/10464/387/3796/55125/440145/1104/22974/126731/23122/29127/10735/24137/4605/3833/9055/991	22
BP	GO:0045727	positive regulation of translation	36/2329	136/18866	5.72634e-06	0.000199574	0.000170627	10657/23367/65109/1968/54915/6659/51441/1660/60558/84271/1938/54505/113251/55226/26986/7555/6125/387/55005/8664/127933/440275/1981/1654/708/6191/2475/10600/54931/253943/3646/55364/23654/4869/5591/6154	36
BP	GO:0000184	nuclear-transcribed mRNA catabolic process, nonsense-mediated decay	33/2329	120/18866	5.72764e-06	0.000199574	0.000170627	65109/26019/55802/4686/26986/6125/55629/23049/5073/22916/6194/1981/6230/4736/6135/6191/3646/6202/6129/6229/6206/6207/6222/6189/6164/6175/6218/6133/6227/6155/6122/6144/6154	33
BP	GO:0034508	centromere complex assembly	20/2329	56/18866	5.81555e-06	0.000201472	0.00017225	55320/8467/79682/54069/11339/3070/55166/23126/1060/5925/8294/5928/64105/4869/1062/57082/64946/1063/8364/55355	20
BP	GO:1904869	regulation of protein localization to Cajal body	8/2329	11/18866	6.22448e-06	0.000213189	0.000182267	1736/10694/10575/10576/908/10574/7203/51574	8
BP	GO:1904871	positive regulation of protein localization to Cajal body	8/2329	11/18866	6.22448e-06	0.000213189	0.000182267	1736/10694/10575/10576/908/10574/7203/51574	8
BP	GO:0030219	megakaryocyte differentiation	29/2329	100/18866	6.71042e-06	0.000228533	0.000195386	2033/5781/10163/9739/11091/5469/3815/4297/10019/55170/58508/861/865/8085/27327/26523/55904/8294/2551/64783/338382/2624/23112/10006/192670/6722/8364/4208/4211	29
BP	GO:0000245	spliceosomal complex assembly	26/2329	85/18866	6.84613e-06	0.000231845	0.000198218	6431/6426/4686/24148/10658/51747/10946/101954264/27316/1653/27339/101954272/100151683/10772/11168/101954277/55015/26824/6631/6635/6430/23020/10659/23451/6633/101954267	26
BP	GO:1904814	regulation of protein localization to chromosome, telomeric region	9/2329	14/18866	7.32518e-06	0.000246683	0.000210903	54552/1736/10694/26354/10575/10576/908/10574/7203	9
BP	GO:0032784	regulation of DNA-templated transcription, elongation	18/2329	48/18866	7.68808e-06	0.000257465	0.000220122	27336/23160/123169/22828/11198/8861/2146/10771/3192/284695/10915/165918/904/25920/8621/905/55209/3150	18
BP	GO:0072431	signal transduction involved in mitotic G1 DNA damage checkpoint	20/2329	57/18866	7.92573e-06	0.000262507	0.000224433	2033/6659/55571/5111/57472/9125/7157/835/4194/51499/5325/79733/1869/7027/5591/983/7029/891/6154/28984	20
BP	GO:1902400	intracellular signal transduction involved in G1 DNA damage checkpoint	20/2329	57/18866	7.92573e-06	0.000262507	0.000224433	2033/6659/55571/5111/57472/9125/7157/835/4194/51499/5325/79733/1869/7027/5591/983/7029/891/6154/28984	20
BP	GO:0034644	cellular response to UV	25/2329	81/18866	8.57152e-06	0.000282345	0.000241393	2033/5429/5111/7528/54617/23028/7157/142/4609/23411/468/440275/22890/6872/51499/7507/163859/55364/993/4869/1111/4734/6154/94241/5295	25
BP	GO:0018023	peptidyl-lysine trimethylation	19/2329	53/18866	9.29967e-06	0.000304665	0.000260476	79723/9739/8473/200424/29072/11137/4297/80335/23168/23067/55677/23411/8085/6598/546/55904/5926/55209/9646	19
BP	GO:0051321	meiotic cell cycle	56/2329	254/18866	9.57655e-06	0.00031204	0.000266781	10927/9126/7155/55706/51441/8243/10592/4361/2956/811/7516/10111/9897/5567/116138/9918/9183/4627/63979/83990/701/4292/10051/9724/114791/3619/10097/7153/1060/149420/546/151246/84930/23310/5885/1164/675/3643/8438/6117/259266/3014/993/10735/192670/84057/699/80010/7272/57820/23397/4683/143689/7552/991/8900	56
BP	GO:0000018	regulation of DNA recombination	30/2329	107/18866	9.86451e-06	0.000316294	0.000270418	79915/56916/4436/23028/7486/4361/2956/55183/118460/10111/29072/54537/142/10721/196528/63979/3838/10635/4292/10097/56893/8914/80311/7468/64110/7037/1111/9466/7552/8971	30
BP	GO:0030330	DNA damage response, signal transduction by p53 class mediator	30/2329	107/18866	9.86451e-06	0.000316294	0.000270418	2033/6659/55571/5111/57472/23028/9125/7157/835/23411/4194/51499/1655/546/1859/675/754/5325/79733/672/2305/1869/7027/5366/4683/983/7029/891/6154/28984	30
BP	GO:0048524	positive regulation of viral process	30/2329	107/18866	9.86451e-06	0.000316294	0.000270418	23367/23633/2033/7155/6882/1660/23076/26986/51495/201626/64710/5430/3838/5431/1654/904/7153/6598/10475/25920/6667/5440/5586/10465/103/3312/4851/3123/1436/3725	30
BP	GO:0031061	negative regulation of histone methylation	11/2329	21/18866	1.06593e-05	0.000336409	0.000287616	3720/11091/23028/54880/22823/55170/23411/1789/6598/672/1786	11
BP	GO:0033962	P-body assembly	11/2329	21/18866	1.06593e-05	0.000336409	0.000287616	255967/57472/11273/26065/27258/149041/8994/25819/550643/1778/1656	11
BP	GO:0080182	histone H3-K4 trimethylation	11/2329	21/18866	1.06593e-05	0.000336409	0.000287616	9739/8473/200424/4297/80335/23168/23067/8085/55904/5926/9646	11
BP	GO:0006368	transcription elongation from RNA polymerase II promoter	26/2329	87/18866	1.09282e-05	0.000343101	0.000293337	23160/123169/4686/11198/55840/8861/2146/29072/2967/10771/3192/10915/23168/165918/22916/55677/5430/5431/904/27125/25920/5440/8621/905/6749/9646	26
BP	GO:0060968	regulation of gene silencing	36/2329	140/18866	1.15887e-05	0.000361953	0.000309454	9698/55706/23369/23279/1660/29028/348995/9972/23225/7157/55746/53371/23511/9631/25842/3159/5430/5903/1981/5431/57510/23165/27327/1655/26523/5440/8294/9611/54454/8994/8318/5530/4613/103/8364/8971	36
BP	GO:2000045	regulation of G1/S transition of mitotic cell cycle	44/2329	185/18866	1.16768e-05	0.000362823	0.000310198	693175/1021/328/2033/26060/6659/26057/55571/55159/5111/57472/407006/54617/5311/5933/9125/2146/7157/835/407007/1981/4194/1654/51499/10106/5925/55904/9928/5325/894/8318/79733/91607/6868/1869/596/7027/5591/983/7029/891/6154/28984/301	44
BP	GO:0031571	mitotic G1 DNA damage checkpoint	21/2329	63/18866	1.18486e-05	0.000366274	0.000313148	2033/6659/55571/55159/5111/57472/9125/7157/835/4194/51499/5325/79733/1869/7027/5591/983/7029/891/6154/28984	21
BP	GO:0006418	tRNA aminoacylation for protein translation	17/2329	45/18866	1.22219e-05	0.000375886	0.000321366	10056/1615/55157/2058/55699/4677/3376/2193/9255/5917/51520/79731/57038/92935/51067/5859/16	17
BP	GO:0030099	myeloid cell differentiation	84/2329	431/18866	1.24926e-05	0.000382261	0.000326817	1021/2033/5781/123169/10163/10766/9739/407006/11091/5469/375387/2739/3815/23376/8861/3658/51522/4297/10019/3313/4627/9991/142/4609/55170/407007/23411/58508/861/5814/51341/865/1054/440712/1499/8085/23774/27327/836/2475/3071/5925/26523/55904/8294/10320/7071/2551/64783/84522/10935/338382/2624/5926/2194/139716/23112/9644/10006/54892/4352/192670/103/9646/7037/863/5579/5591/6722/2353/3205/8364/3202/371…	84
BP	GO:0031062	positive regulation of histone methylation	16/2329	41/18866	1.35721e-05	0.000412309	0.000352507	4602/3720/8473/11091/55183/94104/4297/22823/23168/23411/1789/1499/55904/672/1786/9646	16
BP	GO:0072332	intrinsic apoptotic signaling pathway by p53 class mediator	24/2329	78/18866	1.36654e-05	0.000412309	0.000352507	79915/2033/4436/23028/7157/6880/54700/3094/204851/7159/23411/51616/51499/6135/1655/10210/3190/675/754/79073/1869/596/5366/6154	24
BP	GO:0046112	nucleobase biosynthetic process	10/2329	18/18866	1.37482e-05	0.000412309	0.000352507	10606/51727/3251/5471/56474/2618/790/2475/5631/100	10
BP	GO:0051571	positive regulation of histone H3-K4 methylation	10/2329	18/18866	1.37482e-05	0.000412309	0.000352507	4602/11091/4297/23168/1789/1499/55904/672/1786/9646	10
BP	GO:0072413	signal transduction involved in mitotic cell cycle checkpoint	20/2329	59/18866	1.43249e-05	0.000423288	0.000361893	2033/6659/55571/5111/57472/9125/7157/835/4194/51499/5325/79733/1869/7027/5591/983/7029/891/6154/28984	20
BP	GO:1902402	signal transduction involved in mitotic DNA damage checkpoint	20/2329	59/18866	1.43249e-05	0.000423288	0.000361893	2033/6659/55571/5111/57472/9125/7157/835/4194/51499/5325/79733/1869/7027/5591/983/7029/891/6154/28984	20
BP	GO:1902403	signal transduction involved in mitotic DNA integrity checkpoint	20/2329	59/18866	1.43249e-05	0.000423288	0.000361893	2033/6659/55571/5111/57472/9125/7157/835/4194/51499/5325/79733/1869/7027/5591/983/7029/891/6154/28984	20
BP	GO:1904358	positive regulation of telomere maintenance via telomere lengthening	15/2329	37/18866	1.46273e-05	0.000430113	0.000367729	1736/80351/10694/10575/10576/908/5073/7520/1499/10574/3181/79618/7203/3178/140609	15
BP	GO:0006613	cotranslational protein targeting to membrane	30/2329	109/18866	1.47013e-05	0.000430192	0.000367796	6731/29927/6734/6726/9697/23471/6125/23204/6194/6230/4736/6135/6191/6202/6129/6229/6206/6747/6207/6222/6189/6164/6175/6218/6133/6227/6155/6122/6144/6154	30
BP	GO:0032388	positive regulation of intracellular transport	50/2329	222/18866	1.53507e-05	0.000446573	0.000381801	10657/64328/10971/57506/11052/7532/64062/1660/3799/10541/51496/7157/9585/7531/80184/23379/4478/7529/3843/9777/9695/22916/7159/54741/7533/3326/8898/55754/25930/6721/10075/10155/23209/89781/3728/5108/9847/5621/79752/1778/1869/596/7027/5366/4734/983/3717/7029/10615/5295	50
BP	GO:0033157	regulation of intracellular protein transport	57/2329	264/18866	1.54093e-05	0.000446573	0.000381801	64328/10971/57506/5781/9221/7532/3799/10541/51569/51496/3998/7157/29072/9585/7531/80184/23379/7529/3843/53371/7327/9777/6845/57187/9695/7514/27248/51465/55677/7159/54741/7533/127933/3326/57510/55754/6721/9530/10075/10155/89781/3728/5108/9847/5621/284/79752/1869/596/7027/55486/5366/7295/983/3717/7029/5295	57
BP	GO:0044783	G1 DNA damage checkpoint	21/2329	64/18866	1.55992e-05	0.000447773	0.000382827	2033/6659/55571/55159/5111/57472/9125/7157/835/4194/51499/5325/79733/1869/7027/5591/983/7029/891/6154/28984	21
BP	GO:0044819	mitotic G1/S transition checkpoint	21/2329	64/18866	1.55992e-05	0.000447773	0.000382827	2033/6659/55571/55159/5111/57472/9125/7157/835/4194/51499/5325/79733/1869/7027/5591/983/7029/891/6154/28984	21
BP	GO:1903405	protein localization to nuclear body	8/2329	12/18866	1.66398e-05	0.000473136	0.000404512	1736/10694/10575/10576/908/10574/7203/51574	8
BP	GO:1904867	protein localization to Cajal body	8/2329	12/18866	1.66398e-05	0.000473136	0.000404512	1736/10694/10575/10576/908/10574/7203/51574	8
BP	GO:0042273	ribosomal large subunit biogenesis	23/2329	74/18866	1.70882e-05	0.000483605	0.000413462	79707/9875/55003/6125/51187/80135/84365/4736/6135/54680/23195/55153/65008/8886/2971/220717/26156/6129/51154/4869/6175/6122/6154	23
BP	GO:0006614	SRP-dependent cotranslational protein targeting to membrane	29/2329	105/18866	1.88621e-05	0.000530967	0.000453955	6731/29927/6734/6726/9697/23471/6125/6194/6230/4736/6135/6191/6202/6129/6229/6206/6747/6207/6222/6189/6164/6175/6218/6133/6227/6155/6122/6144/6154	29
BP	GO:0007063	regulation of sister chromatid cohesion	11/2329	22/18866	1.8938e-05	0.000530967	0.000453955	10664/23137/6421/2237/1499/55719/546/5925/5885/699/113130	11
BP	GO:1902806	regulation of cell cycle G1/S phase transition	47/2329	206/18866	1.9178e-05	0.000535209	0.000457581	693175/1021/328/2033/26060/6659/26057/55571/55159/5111/57472/407006/54617/5311/5933/9125/2146/7157/835/11331/407007/1981/4194/1654/6872/51499/10106/5925/55904/9928/5325/894/8318/79733/493/91607/6868/1869/596/7027/5591/983/7029/891/6154/28984/301	47
BP	GO:0097711	ciliary basal body-plasma membrane docking	27/2329	95/18866	2.06088e-05	0.000572488	0.000489453	7532/11064/203068/26123/9657/55835/22919/7531/80184/9793/22995/54801/55125/9702/10733/10383/9662/10142/10806/1781/5108/115106/4957/3320/1778/80321/983	27
BP	GO:0051567	histone H3-K9 methylation	15/2329	38/18866	2.14189e-05	0.000592262	0.000506359	4602/3720/83852/79723/55870/23028/55183/23411/1789/6598/546/672/5926/55209/1786	15
BP	GO:0042274	ribosomal small subunit biogenesis	23/2329	75/18866	2.17934e-05	0.000599865	0.000512859	8602/55127/84946/27340/83732/55226/9790/55720/79954/25926/153443/7520/57050/6194/28987/26284/705/6202/6229/4869/5591/6218/6227	23
BP	GO:1900739	regulation of protein insertion into mitochondrial membrane involved in apoptotic signaling pathway	12/2329	26/18866	2.20661e-05	0.000601874	0.000514577	10971/7532/7157/7531/7529/7159/7533/1869/596/7027/5366/7029	12
BP	GO:1900740	positive regulation of protein insertion into mitochondrial membrane involved in apoptotic signaling pathway	12/2329	26/18866	2.20661e-05	0.000601874	0.000514577	10971/7532/7157/7531/7529/7159/7533/1869/596/7027/5366/7029	12
BP	GO:0006409	tRNA export from nucleus	14/2329	34/18866	2.2828e-05	0.000610725	0.000522144	55706/23279/348995/9972/23225/11260/55746/53371/23511/9631/5903/23165/65083/6741	14
BP	GO:0009156	ribonucleoside monophosphate biosynthetic process	14/2329	34/18866	2.2828e-05	0.000610725	0.000522144	10606/5634/3615/51727/3251/5471/2618/790/5198/159/5631/7371/132/100	14
BP	GO:0032212	positive regulation of telomere maintenance via telomerase	14/2329	34/18866	2.2828e-05	0.000610725	0.000522144	1736/80351/10694/10575/10576/908/5073/7520/1499/10574/79618/7203/3178/140609	14
BP	GO:0071431	tRNA-containing ribonucleoprotein complex export from nucleus	14/2329	34/18866	2.2828e-05	0.000610725	0.000522144	55706/23279/348995/9972/23225/11260/55746/53371/23511/9631/5903/23165/65083/6741	14
BP	GO:1905269	positive regulation of chromatin organization	29/2329	106/18866	2.29389e-05	0.000610725	0.000522144	4602/3720/83852/8473/11091/23028/10270/55183/94104/7157/4297/22823/23168/84656/23411/1789/1499/2648/54737/6598/55904/10155/23272/672/408/1786/9646/8986/891	29
BP	GO:0006977	DNA damage response, signal transduction by p53 class mediator resulting in cell cycle arrest	19/2329	56/18866	2.29985e-05	0.000610725	0.000522144	2033/6659/55571/5111/57472/9125/7157/835/4194/51499/5325/79733/1869/7027/983/7029/891/6154/28984	19
BP	GO:0010586	miRNA metabolic process	13/2329	30/18866	2.32132e-05	0.000613725	0.000524709	87178/10521/8570/5073/8575/149041/57510/26523/54542/27044/167153/192670/23405	13
BP	GO:0006606	protein import into nucleus	37/2329	150/18866	2.40472e-05	0.000632998	0.000541187	10527/23633/1434/57506/26060/9221/3839/5469/9972/51569/7157/55746/26953/3843/53371/23511/9631/55705/3841/11331/3838/3326/5903/23534/1871/30000/10155/754/55916/5530/6850/3728/3842/284/983/3717/5295	37
BP	GO:0048872	homeostasis of number of cells	55/2329	256/18866	2.49608e-05	0.000650328	0.000556003	1021/5781/407006/2322/5469/6654/3815/23376/25/8861/2146/3658/51522/10019/54700/3313/9991/407007/51341/149041/1054/440712/23774/836/2271/3071/5925/55904/10320/54542/2624/5926/6229/139818/54892/4352/84636/6868/103/596/124976/171023/5366/5591/6722/5052/100/6218/202309/3202/3717/4208/9133/4851/301	55
BP	GO:0051310	metaphase plate congression	20/2329	61/18866	2.50292e-05	0.000650328	0.000556003	283489/3192/8697/10464/9183/4292/55166/3619/1060/9928/55143/81620/1062/1778/11004/1063/3833/113130/891/10615	20
BP	GO:1904356	regulation of telomere maintenance via telomere lengthening	20/2329	61/18866	2.50292e-05	0.000650328	0.000556003	54552/1736/80351/10694/55226/10575/3192/10576/908/5073/142/7520/1499/10574/3181/79618/7203/3178/79991/140609	20
BP	GO:0090329	regulation of DNA-dependent DNA replication	18/2329	52/18866	2.75664e-05	0.000713176	0.000609735	5111/11232/54617/5983/8317/56897/79075/5985/546/675/90381/8914/79733/81620/30968/91607/51053/4683	18
BP	GO:0034976	response to endoplasmic reticulum stress	61/2329	294/18866	2.83191e-05	0.00072952	0.000623709	2033/821/6734/201595/56886/1388/64764/1938/811/23190/1200/23376/51569/9097/11236/7157/282679/81542/80020/2673/7327/9695/27248/116138/51465/23411/23197/23392/2135/468/80267/3708/7184/488/10955/440275/1981/84919/9820/1654/26003/10106/9354/9601/4976/29978/22872/6400/84447/2923/6048/10613/596/3309/5366/10130/10525/489/4217/5295/3725	61
BP	GO:0044380	protein localization to cytoskeleton	19/2329	57/18866	3.05348e-05	0.000783251	0.000669646	283489/22919/9585/3192/64770/10464/55125/51104/84376/1729/6491/84687/2804/5108/7272/9419/10982/4130/10615	19
BP	GO:0072599	establishment of protein localization to endoplasmic reticulum	32/2329	124/18866	3.21218e-05	0.000820466	0.000701464	6731/29927/6734/6726/9697/23471/6125/60559/6194/6230/4736/6135/6191/6202/6129/6229/6206/6747/6207/3309/6222/6189/6164/6175/10890/6218/6133/6227/6155/6122/6144/6154	32
BP	GO:0043039	tRNA aminoacylation	17/2329	48/18866	3.26671e-05	0.000830874	0.000710362	10056/1615/55157/2058/55699/4677/3376/2193/9255/5917/51520/79731/57038/92935/51067/5859/16	17
BP	GO:0006268	DNA unwinding involved in DNA replication	9/2329	16/18866	3.3159e-05	0.000836328	0.000715025	7486/4173/4171/3159/4175/4176/6117/56652/9401	9
BP	GO:0046831	regulation of RNA export from nucleus	9/2329	16/18866	3.3159e-05	0.000836328	0.000715025	10657/11052/64062/1660/9972/29072/57187/22916/55677	9
BP	GO:0009123	nucleoside monophosphate metabolic process	22/2329	72/18866	3.47679e-05	0.000873254	0.000746595	50808/10606/5634/3615/51727/10111/1633/3251/5471/2618/790/5198/7298/159/5631/1635/7083/7371/1841/132/204/100	22
BP	GO:1902253	regulation of intrinsic apoptotic signaling pathway by p53 class mediator	13/2329	31/18866	3.54721e-05	0.000887245	0.000758557	79915/23028/7157/6880/54700/23411/51616/51499/6135/3190/754/596/6154	13
BP	GO:0008630	intrinsic apoptotic signaling pathway in response to DNA damage	28/2329	103/18866	3.57577e-05	0.000890692	0.000761503	79915/2033/4436/23028/2956/25/7157/835/599/6880/204851/23411/51616/4292/51499/7507/10210/3190/675/4170/79073/672/1869/596/5591/6154/5295/6387	28
BP	GO:0000731	DNA synthesis involved in DNA repair	18/2329	53/18866	3.69607e-05	0.00090613	0.000774703	5429/5111/7486/5422/26073/5983/56897/23411/5985/5427/22890/5980/51514/51455/6117/201973/9768/5426	18
BP	GO:0032210	regulation of telomere maintenance via telomerase	18/2329	53/18866	3.69607e-05	0.00090613	0.000774703	54552/1736/80351/10694/55226/10575/3192/10576/908/5073/7520/1499/10574/79618/7203/3178/79991/140609	18
BP	GO:0072698	protein localization to microtubule cytoskeleton	18/2329	53/18866	3.69607e-05	0.00090613	0.000774703	283489/22919/9585/3192/64770/10464/55125/51104/84376/1729/6491/2804/5108/7272/9419/10982/4130/10615	18
BP	GO:1904851	positive regulation of establishment of protein localization to telomere	7/2329	10/18866	3.69788e-05	0.00090613	0.000774703	1736/10694/10575/10576/908/10574/7203	7
BP	GO:0045005	DNA-dependent DNA replication maintenance of fidelity	16/2329	44/18866	3.81587e-05	0.000931257	0.000796185	55159/5111/7486/4361/54465/64710/348654/1763/546/675/4796/8914/201973/91607/5426/25939	16
BP	GO:0051783	regulation of nuclear division	43/2329	188/18866	3.99196e-05	0.000970303	0.000829568	64793/55023/23137/811/3832/9585/4733/3192/8697/9183/8881/11331/8556/9820/701/4041/4288/1104/348654/55719/546/5925/9735/5885/3643/84687/8621/51203/126731/81620/54443/1062/699/7272/1111/1063/113130/10783/891/255324/7552/28984/991	43
BP	GO:0017038	protein import	45/2329	200/18866	4.10041e-05	0.000992661	0.000848683	10527/23633/1434/57506/26060/9221/9804/3839/5469/100287932/9972/51569/7157/55746/26953/3843/53371/23511/9631/55705/3841/11331/3838/3326/5903/23534/1871/30000/8504/10155/754/55916/5530/6850/3728/3842/3320/100652748/284/3312/3329/983/5190/3717/5295	45
BP	GO:1903312	negative regulation of mRNA metabolic process	25/2329	88/18866	4.14641e-05	0.000995892	0.000851445	23367/10492/6431/9967/1660/26986/27316/3192/55603/9991/6432/5725/10949/10772/904/4904/708/3181/2475/3190/1859/11044/25819/9646/1869	25
BP	GO:0045047	protein targeting to ER	31/2329	120/18866	4.1468e-05	0.000995892	0.000851445	6731/29927/6734/6726/9697/23471/6125/60559/6194/6230/4736/6135/6191/6202/6129/6229/6206/6747/6207/3309/6222/6189/6164/6175/6218/6133/6227/6155/6122/6144/6154	31
BP	GO:0000288	nuclear-transcribed mRNA catabolic process, deadenylation-dependent decay	23/2329	78/18866	4.37039e-05	0.00104253	0.00089132	55802/678/55571/255967/57472/9125/118460/26986/23404/201626/9652/5073/27258/149041/4292/27327/54542/57819/11044/25819/23112/56915/1656	23
BP	GO:0006284	base-excision repair	15/2329	40/18866	4.37559e-05	0.00104253	0.00089132	328/5111/7486/3159/7374/2237/10721/55170/1763/7507/10075/6117/23201/55247/5426	15
BP	GO:0043038	amino acid activation	17/2329	49/18866	4.43068e-05	0.00104738	0.000895464	10056/1615/55157/2058/55699/4677/3376/2193/9255/5917/51520/79731/57038/92935/51067/5859/16	17
BP	GO:0061647	histone H3-K9 modification	17/2329	49/18866	4.43068e-05	0.00104738	0.000895464	4602/3720/83852/79723/55870/23028/55183/4297/23411/1789/6598/546/672/5926/55209/1786/1111	17
BP	GO:0034728	nucleosome organization	42/2329	183/18866	4.48385e-05	0.00105581	0.00090267	8289/54107/6599/10847/10664/11198/54617/55320/10541/23522/7259/6418/29072/23270/81611/50809/25842/4171/3159/8467/2186/79682/196528/10036/54069/6601/11339/55166/1060/6598/546/5757/8294/5928/3014/64105/4869/57082/64946/8364/55355/8971	42
BP	GO:1901989	positive regulation of cell cycle phase transition	29/2329	110/18866	4.84971e-05	0.00113558	0.000970873	693175/55920/328/79915/26057/407006/2146/8317/8697/8881/11331/407007/1981/1654/51514/5925/55904/894/8318/993/81620/4869/6868/7027/983/113130/891/28984/301	29
BP	GO:1901992	positive regulation of mitotic cell cycle phase transition	26/2329	94/18866	4.86031e-05	0.00113558	0.000970873	693175/55920/328/26057/407006/8317/8697/8881/11331/407007/1981/1654/51514/5925/55904/894/8318/993/81620/6868/7027/983/113130/891/28984/301	26
BP	GO:0006376	mRNA splice site selection	18/2329	54/18866	4.90922e-05	0.00113818	0.000973099	6431/6426/10658/51747/10946/101954264/27316/101954272/100151683/10772/11168/101954277/55015/26824/6631/6430/10659/101954267	18
BP	GO:0034724	DNA replication-independent nucleosome organization	18/2329	54/18866	4.90922e-05	0.00113818	0.000973099	11198/55320/25842/8467/79682/54069/11339/55166/1060/546/8294/5928/64105/4869/57082/64946/8364/55355	18
BP	GO:0009314	response to radiation	84/2329	447/18866	4.9372e-05	0.00114028	0.000974895	2033/5429/23173/55159/5111/8243/25896/4436/7528/54617/23028/7486/2956/11073/3815/7516/7157/10988/2776/79184/1958/64710/56852/2237/6240/165918/7398/847/142/4609/23411/1789/63979/468/7520/9187/10635/440275/22890/23621/6872/4041/51499/836/7507/8491/163859/51514/2547/2475/64421/675/90381/10276/79073/51455/8438/55364/3014/993/672/408/167153/201973/4869/3150/3727/867/596/3309/9768/1111/5591/7295/2353/4…	84
BP	GO:0042771	intrinsic apoptotic signaling pathway in response to DNA damage by p53 class mediator	16/2329	45/18866	5.24686e-05	0.00120718	0.00103209	79915/2033/4436/23028/7157/6880/204851/23411/51616/51499/10210/3190/675/79073/596/6154	16
BP	GO:0033045	regulation of sister chromatid segregation	24/2329	84/18866	5.29959e-05	0.00121088	0.00103526	10664/23137/6421/3192/8697/2237/9183/8881/701/1499/348654/55719/546/5925/5885/81620/1062/699/7272/1063/113130/10783/891/991	24
BP	GO:0006333	chromatin assembly or disassembly	48/2329	220/18866	5.30315e-05	0.00121088	0.00103526	8289/54107/6599/9031/10664/83852/79723/11198/55320/10541/23522/7259/6418/7157/23270/50809/25842/4171/3159/8467/79682/22893/196528/23411/10036/54069/6601/11339/3070/55166/79829/54737/1060/6598/546/8294/5928/10155/3014/23272/64105/4869/1786/57082/64946/8364/55355/8971	48
BP	GO:0019079	viral genome replication	32/2329	127/18866	5.33036e-05	0.00121251	0.00103664	23367/23633/27336/57506/7155/407006/9475/7913/26986/51495/201626/64710/8411/63901/407007/27350/440275/1654/1655/7153/54737/6598/10475/3609/10155/23272/5586/10465/103/596/3312/4851	32
BP	GO:1900034	regulation of cellular response to heat	23/2329	79/18866	5.45269e-05	0.00123567	0.00105645	2033/55706/23279/348995/9529/9972/23225/7531/55746/53371/23511/9631/23411/3326/5903/23165/2475/9530/10728/6117/3320/3312/947	23
BP	GO:0034250	positive regulation of cellular amide metabolic process	39/2329	167/18866	5.50551e-05	0.00124297	0.00106268	10657/23367/65109/1968/54915/6659/51441/1660/60558/84271/1938/54505/113251/9475/55226/26986/7555/6125/387/55005/8664/127933/440275/1981/1654/836/708/6191/2475/10600/54931/253943/6667/3646/55364/23654/4869/5591/6154	39
BP	GO:1901991	negative regulation of mitotic cell cycle phase transition	53/2329	251/18866	5.66286e-05	0.0012707	0.00108639	1021/2033/678/6659/55571/55159/5111/57472/5311/5933/9125/4361/11073/2146/5884/7157/835/8454/9183/57551/63967/701/5684/4194/51499/4998/348654/5695/10106/5925/51347/5885/90381/5325/79733/5707/672/81620/91607/1869/699/596/7027/7272/5591/4683/1063/983/7029/891/6154/28984/991	53
BP	GO:0010639	negative regulation of organelle organization	79/2329	416/18866	5.67051e-05	0.0012707	0.00108639	54552/10432/3720/10163/292/10059/29028/80351/11091/5062/23028/26586/55226/3998/6418/7157/10111/22919/3192/599/54880/22823/25842/4171/3159/9183/142/55170/23411/1789/57551/4534/7520/701/51499/348654/136319/7153/2648/6598/22974/140775/546/1859/5885/4976/9530/10075/54454/84079/672/23122/81620/3178/10493/91663/6879/4869/85358/3925/550643/1786/9168/699/55486/79991/7037/7272/1111/4683/1063/829/891/50944…	79
BP	GO:1901988	negative regulation of cell cycle phase transition	56/2329	270/18866	5.96827e-05	0.00133247	0.00113921	1021/2033/678/6659/55571/55159/5111/57472/5311/5933/9125/4361/11073/2146/5884/7157/835/79184/8454/9183/57551/63967/701/5684/4194/51499/4998/348654/5695/51514/10106/5925/51347/5885/90381/5325/79733/5707/672/81620/91607/1869/699/596/7027/7272/1111/5591/4683/1063/983/7029/891/6154/28984/991	56
BP	GO:0043401	steroid hormone mediated signaling pathway	34/2329	139/18866	6.05156e-05	0.00134608	0.00115084	8289/2033/6502/5469/9125/811/9113/23376/51569/7337/8031/387/10521/57178/142/11331/29966/23411/7533/861/51341/865/6049/8085/1655/164091/9611/7110/672/6879/55809/2908/4734/3717	34
BP	GO:0000076	DNA replication checkpoint	9/2329	17/18866	6.27306e-05	0.00138007	0.0011799	11073/5884/63967/4998/1763/90381/8914/8318/81620	9
BP	GO:0007096	regulation of exit from mitosis	9/2329	17/18866	6.27306e-05	0.00138007	0.0011799	8697/9183/11331/8556/9735/84687/54443/113130/28984	9
BP	GO:0035855	megakaryocyte development	9/2329	17/18866	6.27306e-05	0.00138007	0.0011799	2033/5781/10163/5469/3815/10019/10006/6722/4211	9
BP	GO:0010948	negative regulation of cell cycle process	70/2329	359/18866	6.30545e-05	0.00138216	0.00118168	1021/2033/10432/678/23269/6659/55571/55159/5111/57472/5311/5933/9125/23468/4361/11073/811/2146/5884/7157/835/8317/79184/8454/23512/9183/57551/63967/3326/701/5684/4194/51499/4998/348654/5695/2648/51514/10106/546/5925/648/51347/5885/90381/5928/6015/5325/79733/5707/672/81620/4869/91607/1869/699/596/7027/7272/1111/5591/4683/1063/983/7029/891/6154/28984/991/6241	70
BP	GO:0007050	cell cycle arrest	50/2329	234/18866	6.60363e-05	0.00144227	0.00123308	1021/2033/6659/55571/5111/57472/4436/5311/9125/811/25/7157/1982/9585/835/87178/4609/8556/127933/3326/440275/4194/55771/51499/163859/2475/5925/55904/115426/5565/5496/84687/51379/5325/79733/672/2305/11180/5621/1869/7027/4683/983/7029/891/6154/4851/94241/28984/1718	50
BP	GO:0031124	mRNA 3'-end processing	27/2329	101/18866	6.71704e-05	0.00146174	0.00124973	6431/11052/23248/65109/6426/123169/4686/22828/84271/7884/10768/26986/87178/57187/51692/22916/6432/6427/904/9295/6430/10250/167153/11051/9646/6626/891	27
BP	GO:0031330	negative regulation of cellular catabolic process	55/2329	265/18866	6.78288e-05	0.00146915	0.00125606	23367/10492/6599/406976/9967/1660/1457/1736/8473/10128/9529/9682/26986/1676/9097/7157/1982/26073/6125/282679/3192/6880/7327/27248/23049/55603/5073/51465/4534/10949/3326/1981/6815/6872/4904/8898/6135/56893/2475/140775/57589/4170/11044/23118/25819/6048/493/11180/167153/1869/596/5294/4130/6093/55353	55
BP	GO:0043966	histone H3 acetylation	19/2329	60/18866	6.79981e-05	0.00146915	0.00125606	54107/117143/11091/23522/8861/6880/4297/9913/9767/23411/23774/2648/6598/675/7862/9678/672/55689/1111	19
BP	GO:0033120	positive regulation of RNA splicing	14/2329	37/18866	6.98668e-05	0.00149878	0.00128139	4686/9967/27316/10262/27339/4691/54407/5430/1859/29896/6430/6434/3312/5295	14
BP	GO:0045070	positive regulation of viral genome replication	14/2329	37/18866	6.98668e-05	0.00149878	0.00128139	23367/7155/26986/51495/201626/64710/1654/7153/10475/5586/10465/103/3312/4851	14
BP	GO:0045930	negative regulation of mitotic cell cycle	67/2329	341/18866	7.04943e-05	0.00150688	0.00128832	1021/2033/7155/678/6659/55571/55159/5111/57472/4436/5311/5933/9125/4361/11073/25/2146/5884/7157/835/1386/87178/8454/9183/57551/8556/63967/701/5684/4194/1499/51499/4998/55055/348654/5695/7153/10106/546/5925/9735/51347/5885/90381/11130/5325/79733/5707/672/81620/9656/91607/1869/699/596/7027/7272/1111/5591/4683/1063/983/7029/891/6154/28984/991	67
BP	GO:0034101	erythrocyte homeostasis	32/2329	129/18866	7.37425e-05	0.00157074	0.00134292	1021/407006/5469/3815/23376/8861/3658/51522/10019/3313/9991/407007/51341/1054/440712/23774/836/3071/5925/55904/10320/2624/5926/6229/54892/103/5591/6722/5052/6218/3202/3717	32
BP	GO:0031503	protein-containing complex localization	59/2329	291/18866	7.54804e-05	0.0016021	0.00136973	55920/6431/65109/6426/26019/55706/4686/23279/3799/6059/84271/7884/348995/84946/9972/23225/2733/2060/11260/6421/29072/3192/55746/9897/53371/23511/80173/9631/57187/7514/23049/84896/163/22883/51692/22916/55677/29890/6432/6427/5903/51068/440145/9295/23165/3181/55341/65083/9321/55153/6430/84248/10250/5108/4869/3842/6741/3087/1759	59
BP	GO:0050821	protein stabilization	42/2329	187/18866	7.59626e-05	0.00160668	0.00137364	2033/3054/6659/9529/54765/10694/811/7157/10575/80155/6125/2776/10576/6880/908/84327/11331/51616/8575/3326/4194/84515/6872/6135/10574/79612/9530/10728/7428/23032/6400/1500/84447/89781/7203/3320/481/23515/51701/3329/5190/5295	42
BP	GO:0009303	rRNA transcription	13/2329	33/18866	7.76298e-05	0.00162483	0.00138916	10927/9329/7157/11137/84172/4691/25926/112495/9330/84365/6598/2475/2971	13
BP	GO:0050685	positive regulation of mRNA processing	13/2329	33/18866	7.76298e-05	0.00162483	0.00138916	123169/4686/9967/27316/10262/27339/4691/22916/29896/6434/11051/3312/891	13
BP	GO:0051984	positive regulation of chromosome segregation	13/2329	33/18866	7.76298e-05	0.00162483	0.00138916	55920/23137/6421/3192/8697/56852/2237/8881/55719/5925/5885/81620/891	13
BP	GO:0045943	positive regulation of transcription by RNA polymerase I	10/2329	21/18866	7.79347e-05	0.00162557	0.00138979	23160/84128/56919/55127/11137/4691/25926/468/6598/2475	10
BP	GO:1990173	protein localization to nucleoplasm	8/2329	14/18866	8.02052e-05	0.00166716	0.00142535	1736/10694/10575/10576/908/10574/7203/51574	8
BP	GO:0001782	B cell homeostasis	12/2329	29/18866	8.30083e-05	0.0017195	0.0014701	6654/25/149041/836/3071/54542/139818/596/124976/100/202309/4208	12
BP	GO:0071158	positive regulation of cell cycle arrest	23/2329	81/18866	8.36085e-05	0.001726	0.00147566	2033/6659/55571/5111/57472/5311/9125/7157/835/4194/51499/115426/51379/5325/79733/672/1869/7027/983/7029/891/6154/28984	23
BP	GO:0070203	regulation of establishment of protein localization to telomere	7/2329	11/18866	9.07988e-05	0.00186804	0.00159709	1736/10694/10575/10576/908/10574/7203	7
BP	GO:0031058	positive regulation of histone modification	25/2329	92/18866	9.23591e-05	0.00189368	0.00161901	4602/3720/8473/11091/23028/10270/55183/94104/7157/4297/22823/23168/84656/23411/1789/1499/2648/6598/55904/672/408/1786/9646/8986/891	25
BP	GO:0030261	chromosome condensation	16/2329	47/18866	9.5799e-05	0.00195093	0.00166797	10592/10270/9918/10051/3619/7153/23310/51203/11044/64151/54892/23397/983/113130/891/8971	16
BP	GO:0031055	chromatin remodeling at centromere	16/2329	47/18866	9.5799e-05	0.00195093	0.00166797	55320/8467/79682/54069/11339/3070/55166/1060/8294/5928/64105/4869/57082/64946/8364/55355	16
BP	GO:0006890	retrograde vesicle-mediated transport, Golgi to endoplasmic reticulum	24/2329	87/18866	9.78221e-05	0.00198543	0.00169745	64083/8729/6836/3832/23760/1314/10959/10945/3796/9183/372/10972/377/55204/1315/26958/6892/51014/29127/1062/23299/56992/24137/11004	24
BP	GO:0060249	anatomical structure homeostasis	86/2329	469/18866	9.88829e-05	0.00200022	0.00171011	54552/54107/328/5781/5111/11171/1736/23137/80351/7486/10694/4361/26354/55183/1200/134430/9657/55226/5422/10111/5983/10575/3192/10576/908/2237/5557/23049/5073/142/4609/57551/5985/4534/5427/7520/3326/56252/1499/1763/10574/3181/2271/71/2547/952/546/5925/64421/675/8294/10728/54360/6117/31/79618/2624/6850/7203/3178/54433/3320/284/596/79991/5028/7037/5023/8842/5591/6722/4683/5052/4130/947/140609/8364/1…	86
BP	GO:0060147	regulation of posttranscriptional gene silencing	30/2329	120/18866	0.000104897	0.00210773	0.00180202	9698/55706/23369/23279/1660/348995/9972/23225/7157/55746/53371/23511/9631/5430/5903/1981/5431/57510/23165/27327/1655/26523/5440/8294/9611/8994/5530/4613/103/8364	30
BP	GO:0060966	regulation of gene silencing by RNA	30/2329	120/18866	0.000104897	0.00210773	0.00180202	9698/55706/23369/23279/1660/348995/9972/23225/7157/55746/53371/23511/9631/5430/5903/1981/5431/57510/23165/27327/1655/26523/5440/8294/9611/8994/5530/4613/103/8364	30
BP	GO:0017148	negative regulation of translation	47/2329	220/18866	0.000108081	0.0021645	0.00185056	693175/9698/23367/10492/4076/54915/678/51441/1979/6726/407006/10658/9125/2058/811/9475/11236/3658/406900/4691/85451/8570/407007/7072/407018/468/149041/440275/1981/1654/54517/4904/27327/7298/406956/26523/253943/3609/10644/56623/3646/23112/10236/192670/6093/1612/1978	47
BP	GO:0030520	intracellular estrogen receptor signaling pathway	18/2329	57/18866	0.000109172	0.00217911	0.00186304	8289/6502/5469/9125/9113/23376/51569/8031/10521/142/11331/29966/861/865/8085/1655/672/6879	18
BP	GO:0000281	mitotic cytokinesis	21/2329	72/18866	0.000110109	0.00219055	0.00187283	54902/6651/26586/9475/9585/5921/387/9820/3619/51203/23157/29127/6683/54443/3925/10112/24137/6093/55165/9055/6711	21
BP	GO:0008608	attachment of spindle microtubules to kinetochore	13/2329	34/18866	0.000111555	0.00220067	0.00188148	55920/283489/3192/23172/1060/5925/81620/29127/1062/57082/11004/891/10615	13
BP	GO:0035372	protein localization to microtubule	9/2329	18/18866	0.000111713	0.00220067	0.00188148	283489/22919/9585/3192/51104/1729/9419/10982/4130	9
BP	GO:1902165	regulation of intrinsic apoptotic signaling pathway in response to DNA damage by p53 class mediator	9/2329	18/18866	0.000111713	0.00220067	0.00188148	79915/23028/6880/23411/51616/51499/3190/596/6154	9
BP	GO:0034080	CENP-A containing nucleosome assembly	15/2329	43/18866	0.000114875	0.00224826	0.00192217	55320/8467/79682/54069/11339/55166/1060/8294/5928/64105/4869/57082/64946/8364/55355	15
BP	GO:0061641	CENP-A containing chromatin organization	15/2329	43/18866	0.000114875	0.00224826	0.00192217	55320/8467/79682/54069/11339/55166/1060/8294/5928/64105/4869/57082/64946/8364/55355	15
BP	GO:0000726	non-recombinational repair	27/2329	104/18866	0.000115481	0.00225281	0.00192606	4361/55183/5893/7913/5422/10111/27339/79184/54537/165918/10721/7520/51341/4292/51444/2547/64421/8294/3014/672/7468/9656/151636/5591/4683/8364/1791	27
BP	GO:0001844	protein insertion into mitochondrial membrane involved in apoptotic signaling pathway	12/2329	30/18866	0.000122872	0.00238926	0.00204272	10971/7532/7157/7531/7529/7159/7533/1869/596/7027/5366/7029	12
BP	GO:0009127	purine nucleoside monophosphate biosynthetic process	10/2329	22/18866	0.000127099	0.00244776	0.00209273	10606/3615/1633/3251/5471/2618/5198/159/132/100	10
BP	GO:0048025	negative regulation of mRNA splicing, via spliceosome	10/2329	22/18866	0.000127099	0.00244776	0.00209273	6431/27316/9991/6432/5725/10772/708/3181/3190/1859	10
BP	GO:0071459	protein localization to chromosome, centromeric region	10/2329	22/18866	0.000127099	0.00244776	0.00209273	55920/283489/10664/9183/55166/5925/81620/57082/7272/983	10
BP	GO:0007064	mitotic sister chromatid cohesion	11/2329	26/18866	0.000129331	0.00247495	0.00211597	23244/8243/23137/79075/55719/23126/546/5925/5885/113130/991	11
BP	GO:0033119	negative regulation of RNA splicing	11/2329	26/18866	0.000129331	0.00247495	0.00211597	6431/27316/9991/6432/5725/10772/708/3181/3190/1859/6207	11
BP	GO:0006336	DNA replication-independent nucleosome assembly	17/2329	53/18866	0.000135676	0.00258816	0.00221277	55320/25842/8467/79682/54069/11339/55166/1060/546/8294/5928/64105/4869/57082/64946/8364/55355	17
BP	GO:0090150	establishment of protein localization to membrane	66/2329	342/18866	0.000137899	0.00262225	0.00224191	10971/6731/64083/7532/57120/29927/6734/340481/6726/9697/23471/7157/7531/6125/282679/7529/6845/22883/163882/7159/7533/23204/6194/2803/5584/26003/55204/6230/4736/6135/6191/23463/8504/6202/6129/6229/6206/9847/51114/5621/6747/3320/481/6207/8548/1869/596/7027/3309/6222/6189/6164/10434/5366/6175/10890/6218/161176/6133/7029/6227/6155/6711/6122/6144/6154	66
BP	GO:0045069	regulation of viral genome replication	26/2329	100/18866	0.000149296	0.00283005	0.00241957	23367/57506/7155/407006/26986/51495/201626/64710/63901/407007/27350/440275/1654/1655/7153/54737/10475/3609/10155/23272/5586/10465/103/596/3312/4851	26
BP	GO:0000083	regulation of transcription involved in G1/S transition of mitotic cell cycle	13/2329	35/18866	0.000157536	0.00295834	0.00252926	5111/5422/4998/7298/5925/8318/81620/2672/1869/7027/7029/6241/8900	13
BP	GO:0009112	nucleobase metabolic process	13/2329	35/18866	0.000157536	0.00295834	0.00252926	23028/10606/51727/3251/5471/56474/6240/2618/790/7298/2475/5631/100	13
BP	GO:0031297	replication fork processing	13/2329	35/18866	0.000157536	0.00295834	0.00252926	55159/5111/7486/4361/54465/64710/348654/1763/546/675/4796/201973/25939	13
BP	GO:0071156	regulation of cell cycle arrest	27/2329	106/18866	0.000163001	0.00305147	0.00260888	2033/6659/55571/5111/57472/5311/9125/811/7157/835/3326/4194/51499/163859/115426/51379/5325/79733/672/2305/1869/7027/983/7029/891/6154/28984	27
BP	GO:0070972	protein localization to endoplasmic reticulum	35/2329	152/18866	0.000173753	0.00324268	0.00277235	6731/8729/29927/6734/6726/9697/23471/6125/60559/10945/6194/6230/4736/6135/6191/2901/6202/6129/6229/6206/6747/6207/3309/6222/6189/6164/6175/10890/6218/6133/6227/6155/6122/6144/6154	35
BP	GO:0071383	cellular response to steroid hormone stimulus	44/2329	206/18866	0.000177061	0.00329422	0.00281641	8289/2033/678/5978/6502/2322/5469/9125/811/9113/23376/51569/8725/3192/7337/8031/387/10521/57178/142/11331/29966/23411/1789/7533/861/51341/865/6049/8085/1655/164091/9611/7110/672/6879/55809/2950/2908/4734/6770/3717/1978/301	44
BP	GO:0050686	negative regulation of mRNA processing	12/2329	31/18866	0.000178071	0.00330281	0.00282376	6431/27316/9991/6432/5725/10772/904/708/3181/3190/1859/9646	12
BP	GO:0043486	histone exchange	18/2329	59/18866	0.000178725	0.00330477	0.00282543	10847/55320/81611/8467/79682/54069/11339/55166/1060/5757/8294/5928/64105/4869/57082/64946/8364/55355	18
BP	GO:0007569	cell aging	29/2329	118/18866	0.000186793	0.00344338	0.00294394	693175/1021/23137/5933/7486/811/25/7157/87178/3159/57178/55170/23411/4904/2475/675/4976/3014/26156/2305/4869/23515/596/1111/5591/6722/983/10783/2022	29
BP	GO:0032239	regulation of nucleobase-containing compound transport	9/2329	19/18866	0.000189029	0.00347398	0.00297011	10657/11052/64062/1660/9972/29072/57187/22916/55677	9
BP	GO:0006303	double-strand break repair via nonhomologous end joining	25/2329	96/18866	0.000193083	0.00353308	0.00302063	4361/55183/7913/5422/10111/27339/79184/54537/165918/10721/7520/51341/4292/2547/64421/8294/3014/672/7468/9656/151636/5591/4683/8364/1791	25
BP	GO:0032201	telomere maintenance via semi-conservative replication	11/2329	27/18866	0.000194003	0.00353308	0.00302063	54107/5111/5422/5983/2237/5557/5985/5427/1763/6117/5426	11
BP	GO:0034243	regulation of transcription elongation from RNA polymerase II promoter	11/2329	27/18866	0.000194003	0.00353308	0.00302063	23160/123169/11198/8861/2146/10771/3192/10915/165918/25920/8621	11
BP	GO:0070202	regulation of establishment of protein localization to chromosome	7/2329	12/18866	0.000194621	0.00353367	0.00302113	1736/10694/10575/10576/908/10574/7203	7
BP	GO:0034063	stress granule assembly	10/2329	23/18866	0.00020006	0.00361067	0.00308697	23369/23215/7812/10146/11273/26065/1654/9908/1778/1656	10
BP	GO:0051570	regulation of histone H3-K9 methylation	10/2329	23/18866	0.00020006	0.00361067	0.00308697	4602/3720/23028/55183/23411/1789/6598/546/672/1786	10
BP	GO:0034249	negative regulation of cellular amide metabolic process	49/2329	238/18866	0.000201201	0.00362042	0.0030953	693175/9698/23367/10492/4076/54915/678/51441/1979/6726/407006/10658/9125/2058/811/9475/11236/3658/406900/4691/85451/8570/407007/7072/407018/468/149041/440275/1981/1654/54517/4904/27327/7298/406956/26523/253943/3609/10644/56623/3646/23112/10236/94101/5621/192670/6093/1612/1978	49
BP	GO:0090501	RNA phosphodiester bond hydrolysis	37/2329	165/18866	0.00020397	0.00365932	0.00312856	328/11052/8602/4686/115752/79707/255967/57472/7247/27340/118460/9790/23404/55720/87178/201626/2237/5073/51692/22916/22803/28987/26523/23357/25819/57523/27044/56915/11051/91607/85463/143689/23405/6227/25939/6036/6037	37
BP	GO:0070316	regulation of G0 to G1 transition	15/2329	45/18866	0.000205599	0.00367759	0.00314419	23269/5469/23468/2146/8317/23512/648/5928/6015/672/1869/7027/1111/7029/6241	15
BP	GO:0033143	regulation of intracellular steroid hormone receptor signaling pathway	21/2329	75/18866	0.000207808	0.00370611	0.00316857	2033/6502/5469/9125/811/9113/23376/51569/387/142/11331/29966/23411/861/51341/865/6049/8085/1655/9611/672	21
BP	GO:0031023	microtubule organizing center organization	32/2329	136/18866	0.000212736	0.00378281	0.00323414	64793/10432/5311/9475/3832/7516/55835/163786/9793/7514/23291/22995/54801/55125/1499/348654/2648/10733/675/9662/6491/23032/10806/672/23122/5108/115106/4957/4869/9768/1111/983	32
BP	GO:0051973	positive regulation of telomerase activity	13/2329	36/18866	0.000218902	0.00388101	0.0033181	1736/10575/10576/5073/4609/7520/3326/1499/3181/10728/79618/3320/140609	13
BP	GO:0035065	regulation of histone acetylation	17/2329	55/18866	0.000225043	0.00397818	0.00340117	10664/6418/23741/4297/84656/55677/23411/2648/6598/90780/2624/672/408/55209/6879/8986/1111	17
BP	GO:0002262	myeloid cell homeostasis	35/2329	154/18866	0.00022744	0.0040088	0.00342735	1021/407006/5469/3815/23376/8861/3658/51522/10019/3313/9991/407007/51341/1054/440712/23774/836/3071/5925/55904/10320/2624/5926/6229/54892/4352/6868/103/5591/6722/5052/6218/3202/3717/301	35
BP	GO:0007098	centrosome cycle	30/2329	125/18866	0.000228781	0.0040196	0.00343658	64793/10432/5311/9475/3832/7516/55835/163786/9793/7514/22995/54801/55125/1499/348654/2648/10733/675/9662/6491/23032/10806/672/5108/115106/4957/4869/9768/1111/983	30
BP	GO:1990823	response to leukemia inhibitory factor	25/2329	97/18866	0.000230053	0.0040196	0.00343658	4144/3720/292/23522/55183/221830/3192/4691/9774/22823/6723/8467/1974/23411/6432/7520/29088/51444/10678/54836/7037/5214/4605/10765/10253	25
BP	GO:1990830	cellular response to leukemia inhibitory factor	25/2329	97/18866	0.000230053	0.0040196	0.00343658	4144/3720/292/23522/55183/221830/3192/4691/9774/22823/6723/8467/1974/23411/6432/7520/29088/51444/10678/54836/7037/5214/4605/10765/10253	25
BP	GO:0000910	cytokinesis	38/2329	172/18866	0.00023255	0.00405148	0.00346384	54902/79848/6651/26586/9475/29072/9585/5921/9897/57448/387/4627/55958/8556/9820/55660/4735/3619/10097/10733/675/9928/51203/55752/79733/5586/23157/29127/6683/54443/3925/28964/10112/24137/6093/55165/9055/6711	38
BP	GO:0070317	negative regulation of G0 to G1 transition	14/2329	41/18866	0.000249766	0.00433888	0.00370956	23269/23468/2146/8317/23512/648/5928/6015/672/1869/7027/1111/7029/6241	14
BP	GO:0045739	positive regulation of DNA repair	20/2329	71/18866	0.000267004	0.00462501	0.00395419	1660/5111/55183/79184/54537/165918/142/196528/23411/1054/55719/10097/8914/10155/3014/672/2305/23201/151636/5591	20
BP	GO:0060218	hematopoietic stem cell differentiation	23/2329	87/18866	0.00026993	0.00466023	0.0039843	4602/1021/51441/9739/23376/6938/25/8861/7157/4297/3313/7520/861/4005/865/5684/54517/5695/2624/5707/5591/6722/3214	23
BP	GO:0045023	G0 to G1 transition	15/2329	46/18866	0.000270584	0.00466023	0.0039843	23269/5469/23468/2146/8317/23512/648/5928/6015/672/1869/7027/1111/7029/6241	15
BP	GO:0010452	histone H3-K36 methylation	8/2329	16/18866	0.000273325	0.00468069	0.00400179	55870/29072/64324/54880/55677/7468/55209/7552	8
BP	GO:1902969	mitotic DNA replication	8/2329	16/18866	0.000273325	0.00468069	0.00400179	4172/5422/4173/4171/4175/9837/675/8318	8
BP	GO:0006360	transcription by RNA polymerase I	19/2329	66/18866	0.000277384	0.00472337	0.00403828	23160/84128/6908/56919/55127/25885/221830/2967/11137/84172/4691/54700/25926/468/6872/6598/2475/5440/653390	19
BP	GO:0046824	positive regulation of nucleocytoplasmic transport	19/2329	66/18866	0.000277384	0.00472337	0.00403828	10657/64328/57506/11052/64062/1660/10541/51496/7157/7531/3843/22916/3326/10155/3728/4734/983/3717/5295	19
BP	GO:0009161	ribonucleoside monophosphate metabolic process	16/2329	51/18866	0.000282318	0.00478633	0.00409211	50808/10606/5634/3615/51727/3251/5471/2618/790/5198/159/5631/7371/132/204/100	16
BP	GO:0010458	exit from mitosis	11/2329	28/18866	0.000284078	0.00478633	0.00409211	8697/9183/11331/8556/9735/84687/23122/6683/54443/113130/28984	11
BP	GO:0048511	rhythmic process	59/2329	305/18866	0.000284181	0.00478633	0.00409211	2033/1374/23394/9967/79723/1660/10059/1457/5111/8473/9475/4841/3615/2146/7157/6421/7150/835/3192/2776/4297/2673/1958/7337/23291/23077/23411/468/836/1655/7298/7153/51514/2475/1859/6667/10075/9611/7071/10743/8914/191/4800/8204/25819/408/10236/196/3727/3309/10499/5591/100/10765/6770/983/9500/4192/3725	59
BP	GO:2000756	regulation of peptidyl-lysine acetylation	18/2329	61/18866	0.000284258	0.00478633	0.00409211	10664/6659/6418/23741/4297/84656/55677/23411/2648/6598/90780/2624/672/408/55209/6879/8986/1111	18
BP	GO:0010332	response to gamma radiation	17/2329	56/18866	0.000286375	0.00480855	0.00411111	23028/7486/7516/7157/1958/142/4609/7520/2547/675/79073/3014/867/596/3309/5591/6154	17
BP	GO:0016925	protein sumoylation	22/2329	82/18866	0.000289975	0.00485547	0.00415122	54552/55706/23279/348995/9972/23225/26354/55746/10054/53371/1958/23511/6612/9631/57178/57691/5903/1499/23165/10210/10155/53335	22
BP	GO:0002320	lymphoid progenitor cell differentiation	9/2329	20/18866	0.000306135	0.0050837	0.00434635	6659/2322/6654/3815/22890/11051/596/5591/4851	9
BP	GO:0009168	purine ribonucleoside monophosphate biosynthetic process	9/2329	20/18866	0.000306135	0.0050837	0.00434635	10606/3615/3251/5471/2618/5198/159/132/100	9
BP	GO:0032986	protein-DNA complex disassembly	9/2329	20/18866	0.000306135	0.0050837	0.00434635	8289/6599/11198/6418/3159/196528/4609/6601/6598	9
BP	GO:1900180	regulation of protein localization to nucleus	30/2329	127/18866	0.000307072	0.00508526	0.00434768	57506/9221/1736/10694/25885/51569/10575/10576/4771/3843/53371/6612/908/142/3326/51068/23607/10574/10155/705/7203/3728/51574/284/7037/151636/983/3717/9500/5295	30
BP	GO:0002200	somatic diversification of immune receptors	21/2329	77/18866	0.000309369	0.00510925	0.0043682	79915/9730/4436/5379/2956/55183/118460/54537/7374/165918/10721/4292/64421/7468/103/7037/5591/3329/4683/9466/25939	21
BP	GO:1903046	meiotic cell cycle process	41/2329	193/18866	0.000325552	0.00536182	0.00458413	7155/55706/51441/10592/4361/2956/811/10111/9897/116138/9918/4627/63979/83990/701/4292/10051/3619/10097/7153/1060/546/151246/84930/23310/5885/1164/675/8438/259266/993/192670/84057/699/80010/7272/57820/23397/7552/991/8900	41
BP	GO:0060964	regulation of gene silencing by miRNA	28/2329	116/18866	0.000329137	0.00540609	0.00462198	9698/55706/23369/23279/1660/348995/9972/23225/7157/55746/53371/23511/9631/5430/5903/1981/5431/23165/27327/1655/26523/5440/8294/9611/8994/5530/4613/8364	28
BP	GO:2001022	positive regulation of response to DNA damage stimulus	26/2329	105/18866	0.000345815	0.00566461	0.004843	1660/5111/55183/79184/9774/54537/165918/142/196528/4609/23411/1054/1655/55719/10097/8914/10155/3014/672/2305/23201/126549/151636/5366/5591/6154	26
BP	GO:0010569	regulation of double-strand break repair via homologous recombination	15/2329	47/18866	0.000352515	0.00575869	0.00492344	23028/55183/29072/54537/142/10721/196528/63979/10635/10097/56893/8914/80311/64110/1111	15
BP	GO:0051304	chromosome separation	24/2329	94/18866	0.000353846	0.00576483	0.00492868	7155/56916/1457/8697/9918/9183/8881/701/4292/348654/7153/5925/23310/5885/81620/1062/699/80010/7272/23397/1063/10783/891/991	24
BP	GO:0006301	postreplication repair	16/2329	52/18866	0.000361565	0.0058747	0.00502262	5429/5111/4436/26073/5983/56852/5985/5427/22890/5980/51514/51455/6117/672/201973/9768	16
BP	GO:0071478	cellular response to radiation	40/2329	188/18866	0.000369764	0.00599176	0.0051227	2033/5429/23173/5111/25896/7528/54617/23028/7486/7157/10988/1958/64710/142/4609/23411/63979/468/7520/10635/440275/22890/6872/51499/7507/163859/2547/10276/79073/55364/3014/993/167153/4869/3309/1111/4734/6154/94241/5295	40
BP	GO:0018206	peptidyl-methionine modification	7/2329	13/18866	0.000376693	0.00605522	0.00517696	60560/23173/80018/80155/10988/79612/51126	7
BP	GO:0031126	snoRNA 3'-end processing	7/2329	13/18866	0.000376693	0.00605522	0.00517696	1736/118460/23404/5073/11044/51574/56915	7
BP	GO:0048096	chromatin-mediated maintenance of transcription	7/2329	13/18866	0.000376693	0.00605522	0.00517696	8289/55038/9792/57492/57178/1499/1111	7
BP	GO:0061640	cytoskeleton-dependent cytokinesis	25/2329	100/18866	0.000381184	0.00611111	0.00522474	54902/6651/26586/9475/9585/5921/9897/387/9820/4735/3619/10097/51203/55752/23157/29127/6683/54443/3925/10112/24137/6093/55165/9055/6711	25
BP	GO:0048193	Golgi vesicle transport	69/2329	374/18866	0.000385465	0.00616336	0.00526941	10564/64083/8729/57120/8615/2802/8673/64764/51552/6836/9135/60684/2060/3832/3998/10427/11236/90411/23760/1314/23243/27252/6845/10959/10945/3796/9183/113419/163882/372/2803/5584/10972/377/9522/54832/51124/55204/55291/22870/9980/55435/1315/26958/22872/6892/338382/2804/51014/29127/51164/1781/6683/1062/122553/1778/8548/23299/10483/56992/10434/24137/11004/10890/399687/10525/829/6102/6711	69
BP	GO:1903747	regulation of establishment of protein localization to mitochondrion	20/2329	73/18866	0.000399255	0.00636695	0.00544347	10971/7532/3998/7157/7531/7529/7159/54741/7533/3301/6721/9530/10075/89781/1869/596/7027/55486/5366/7029	20
BP	GO:0031647	regulation of protein stability	57/2329	296/18866	0.000401793	0.00639052	0.00546363	54552/2033/3054/6659/1650/9529/54765/10694/811/11236/7157/10575/80155/8805/6125/2776/10576/6880/4771/908/23291/84327/11331/23411/51616/8575/3326/4194/84515/6872/6135/836/10574/2648/79612/9530/10728/7428/23032/55602/6400/1500/84447/89781/7203/6048/5621/3320/481/23515/596/3312/51701/5591/3329/5190/5295	57
BP	GO:0050853	B cell receptor signaling pathway	31/2329	135/18866	0.000417291	0.00661956	0.00565944	7006/1997/25/861/865/57181/3071/952/3543/6850/596/148823/5579/4208/26228/4773/3493/28388/28394/28467/28442/3501/28392/28448/28468/3503/28408/28444/28450/28423/3502	31
BP	GO:0030522	intracellular receptor signaling pathway	52/2329	265/18866	0.000445686	0.00705143	0.00602868	9698/8289/2033/23369/26057/6502/5469/9125/811/9113/23376/1399/51569/2146/8805/7337/8031/387/10521/10370/57178/81/142/11331/55252/29966/23411/26065/85364/7533/861/51341/865/6049/54941/8085/1655/708/9611/7110/672/23118/196/6879/55809/171023/2908/4734/329/3717/55914/4929	52
BP	GO:0050000	chromosome localization	21/2329	79/18866	0.000451924	0.00711279	0.00608113	283489/3192/8697/10464/9183/4292/55166/3619/10097/1060/9928/55143/81620/1062/1778/11004/1063/3833/113130/891/10615	21
BP	GO:0051303	establishment of chromosome localization	21/2329	79/18866	0.000451924	0.00711279	0.00608113	283489/3192/8697/10464/9183/4292/55166/3619/10097/1060/9928/55143/81620/1062/1778/11004/1063/3833/113130/891/10615	21
BP	GO:0051972	regulation of telomerase activity	15/2329	48/18866	0.000454855	0.00713629	0.00610122	1736/7157/10575/10576/5073/4609/7520/3326/1499/3181/143/10728/79618/3320/140609	15
BP	GO:0002566	somatic diversification of immune receptors via somatic mutation	8/2329	17/18866	0.00046052	0.00713629	0.00610122	4436/5379/2956/7374/10721/4292/103/25939	8
BP	GO:0006474	N-terminal protein amino acid acetylation	8/2329	17/18866	0.00046052	0.00713629	0.00610122	2033/60560/6659/80018/80155/79829/79612/51126	8
BP	GO:0009299	mRNA transcription	8/2329	17/18866	0.00046052	0.00713629	0.00610122	7024/5469/7157/10114/468/22890/1655/6722	8
BP	GO:0016074	snoRNA metabolic process	8/2329	17/18866	0.00046052	0.00713629	0.00610122	9221/1736/118460/23404/5073/11044/51574/56915	8
BP	GO:0043923	positive regulation by host of viral transcription	8/2329	17/18866	0.00046052	0.00713629	0.00610122	2033/6882/23076/64710/904/6598/6667/3725	8
BP	GO:1904951	positive regulation of establishment of protein localization	68/2329	370/18866	0.000472317	0.00728374	0.00622729	64328/10971/57506/64083/7532/6659/10059/3799/1736/2746/10541/10694/51768/51496/7157/55835/9585/7531/10575/80184/23379/7529/10576/3843/9777/908/9695/11146/163882/7159/54741/7533/3326/23607/55204/10574/55754/952/25930/6721/9662/10075/10155/89781/408/6850/7203/382/3728/5108/9847/5621/79752/1869/596/7027/5366/947/399687/983/3717/7029/7200/5734/28984/5295/8660/3123	68
BP	GO:0009113	purine nucleobase biosynthetic process	6/2329	10/18866	0.000473841	0.00728374	0.00622729	10606/3251/5471/2618/5631/100	6
BP	GO:0036507	protein demannosylation	9/2329	21/18866	0.000477286	0.00728374	0.00622729	56886/10905/11236/9695/80267/6400/84447/6048/4121	9
BP	GO:0036508	protein alpha-1,2-demannosylation	9/2329	21/18866	0.000477286	0.00728374	0.00622729	56886/10905/11236/9695/80267/6400/84447/6048/4121	9
BP	GO:0042276	error-prone translesion synthesis	9/2329	21/18866	0.000477286	0.00728374	0.00622729	5429/5111/5983/5985/5427/5980/51455/6117/201973	9
BP	GO:0060216	definitive hemopoiesis	9/2329	21/18866	0.000477286	0.00728374	0.00622729	678/204851/865/2624/103/3205/3214/4211/3213	9
BP	GO:0009301	snRNA transcription	20/2329	74/18866	0.000484517	0.00737505	0.00630535	23248/6882/4686/6908/57508/25896/23379/6880/81556/22916/5430/55726/5431/904/6667/5440/905/5451/51574/10208	20
BP	GO:2001242	regulation of intrinsic apoptotic signaling pathway	36/2329	166/18866	0.000485965	0.00737505	0.00630535	79915/10059/9529/23028/5326/4841/8725/7157/6421/599/6880/9774/54700/142/23411/51616/63979/8575/3301/10955/1654/51499/6135/3190/4976/4170/754/84447/596/55486/2023/5366/10525/10105/6154/6387	36
BP	GO:0006605	protein targeting	79/2329	444/18866	0.000486939	0.00737505	0.00630535	10971/6731/7532/29927/6734/9804/9868/340481/255967/6726/26515/100287932/26985/9697/8540/23471/3998/293/7531/6125/282679/8443/10953/7529/53371/8031/6845/60559/79158/847/54741/23204/6194/5584/3416/54832/6230/4736/6135/6191/23463/950/6721/9530/10075/8504/6202/390916/6129/89781/6229/6206/9847/51114/5621/6747/3320/100652748/6207/55486/3312/3309/6222/6189/6164/11001/6175/3329/4734/6218/5190/6133/55914/…	79
BP	GO:2000779	regulation of double-strand break repair	22/2329	85/18866	0.000500067	0.0075549	0.00645912	407006/23028/55183/7913/29072/54537/142/10721/196528/63979/10635/55719/10097/56893/8914/80311/2305/7468/64110/151636/1111/5591	22
BP	GO:0006513	protein monoubiquitination	19/2329	69/18866	0.000515318	0.00776584	0.00663947	123169/55120/7324/54880/8454/29128/56852/165918/10210/51514/648/10075/6015/29089/9646/867/151636/4734/329	19
BP	GO:0033146	regulation of intracellular estrogen receptor signaling pathway	13/2329	39/18866	0.000538715	0.00809819	0.00692361	6502/5469/9125/9113/23376/51569/142/11331/29966/861/865/8085/672	13
BP	GO:1900182	positive regulation of protein localization to nucleus	21/2329	80/18866	0.000542538	0.00811825	0.00694076	57506/1736/10694/10575/10576/3843/908/142/3326/51068/23607/10574/10155/7203/3728/51574/7037/151636/983/3717/5295	21
BP	GO:1905268	negative regulation of chromatin organization	18/2329	64/18866	0.000542743	0.00811825	0.00694076	3720/29028/11091/23028/6418/54880/22823/25842/3159/55170/23411/1789/6598/54454/672/6879/1786/8971	18
BP	GO:0018279	protein N-linked glycosylation via asparagine	11/2329	30/18866	0.000571423	0.00852608	0.00728944	6185/1650/201595/56886/58505/3998/90411/51465/84061/8813/6184	11
BP	GO:0050792	regulation of viral process	44/2329	217/18866	0.000580463	0.00863958	0.00738647	23367/23633/57506/2033/7155/6882/1660/23076/407006/5978/26986/51495/201626/64710/9830/63901/407007/27350/5430/3838/440275/5431/1654/904/1655/7153/54737/6598/10475/25920/3609/6667/5440/10155/23272/5586/10465/103/596/3312/4851/3123/1436/3725	44
BP	GO:1901983	regulation of protein acetylation	20/2329	75/18866	0.000585139	0.00868773	0.00742764	10664/6659/6418/23741/4297/84656/55677/23411/57551/1654/2648/6598/90780/2624/672/408/55209/6879/8986/1111	20
BP	GO:1901532	regulation of hematopoietic progenitor cell differentiation	22/2329	86/18866	0.000594818	0.00880973	0.00753195	4602/1021/51441/9739/6654/6938/25/8861/4297/3313/861/4005/865/5684/22890/54517/5695/2624/5707/11051/5591/4851	22
BP	GO:0022406	membrane docking	38/2329	180/18866	0.000598766	0.00884648	0.00756336	57488/7532/11064/8615/8673/203068/26123/9657/55835/22919/7531/80184/4478/9793/22995/54801/55125/152579/9702/23344/22863/10733/10383/9662/10142/10806/26258/1781/5108/115106/4957/3320/5341/1778/80321/10890/6093/983	38
BP	GO:0006457	protein folding	46/2329	230/18866	0.00060337	0.0088927	0.00760288	821/23193/9761/1457/56886/9529/10694/811/3998/1676/10575/4820/10576/3313/908/26278/3301/7184/3326/5903/169714/6782/51645/59345/10574/7841/9601/9530/10728/5082/9360/2923/64215/7411/7203/5202/3320/10465/3312/3309/5203/3329/10130/2770/6102/10105	46
BP	GO:2000134	negative regulation of G1/S transition of mitotic cell cycle	29/2329	126/18866	0.000605136	0.00889698	0.00760654	1021/2033/6659/55571/55159/5111/57472/5311/5933/9125/2146/7157/835/4194/51499/10106/5925/5325/79733/91607/1869/596/7027/5591/983/7029/891/6154/28984	29
BP	GO:0007623	circadian rhythm	44/2329	218/18866	0.000642044	0.00941664	0.00805083	2033/1374/9967/79723/8473/9475/4841/3615/2146/7157/6421/7150/3192/2776/4297/2673/1958/7337/23291/23077/23411/468/7298/7153/2475/1859/10075/9611/7071/10743/8914/191/8204/25819/10236/196/3727/10499/5591/100/6770/983/9500/3725	44
BP	GO:1901030	positive regulation of mitochondrial outer membrane permeabilization involved in apoptotic signaling pathway	12/2329	35/18866	0.000656279	0.00960206	0.00820935	10971/7532/7157/7531/7529/7159/7533/1869/596/7027/5366/7029	12
BP	GO:0000054	ribosomal subunit export from nucleus	7/2329	14/18866	0.000673181	0.00977816	0.00835992	6059/84946/7514/51068/55341/55153/4869	7
BP	GO:0033750	ribosome localization	7/2329	14/18866	0.000673181	0.00977816	0.00835992	6059/84946/7514/51068/55341/55153/4869	7
BP	GO:0071236	cellular response to antibiotic	7/2329	14/18866	0.000673181	0.00977816	0.00835992	2146/7157/10097/3309/6770/4208/5321	7
BP	GO:0030218	erythrocyte differentiation	28/2329	121/18866	0.00068029	0.00984123	0.00841383	1021/407006/5469/3815/23376/8861/51522/10019/3313/9991/407007/51341/1054/440712/23774/836/3071/5925/55904/10320/2624/5926/54892/103/5591/6722/3202/3717	28
BP	GO:2001243	negative regulation of intrinsic apoptotic signaling pathway	24/2329	98/18866	0.000680789	0.00984123	0.00841383	79915/9529/23028/4841/8725/599/6880/54700/23411/51616/63979/3301/1654/51499/4976/4170/754/84447/596/55486/2023/10525/10105/6387	24
BP	GO:0050871	positive regulation of B cell activation	33/2329	151/18866	0.000708521	0.0101979	0.00871877	79915/4436/55183/118460/54537/4292/57181/3071/952/3543/6850/7468/596/7037/100/4208/4773/3493/28388/8660/28394/28467/28442/3501/28392/28448/28468/3503/28408/28444/28450/28423/3502	33
BP	GO:0045740	positive regulation of DNA replication	13/2329	40/18866	0.000708845	0.0101979	0.00871877	79915/1660/5111/54617/8317/1763/546/79733/81620/30968/79991/983/3725	13
BP	GO:0051383	kinetochore organization	9/2329	22/18866	0.000719723	0.0103297	0.00883148	10592/10051/23126/1060/81620/64105/1062/64946/1063	9
BP	GO:0002931	response to ischemia	16/2329	55/18866	0.000723842	0.0103642	0.00886093	29904/5978/1938/9475/7157/23172/599/57492/1958/596/3329/10525/1978/4217/10105/1436	16
BP	GO:0045911	positive regulation of DNA recombination	14/2329	45/18866	0.000733931	0.010465	0.00894716	79915/4436/7486/55183/118460/54537/142/196528/4292/10097/8914/7468/7037/7552	14
BP	GO:0006337	nucleosome disassembly	8/2329	18/18866	0.000739566	0.010465	0.00894716	8289/6599/11198/6418/3159/196528/6601/6598	8
BP	GO:0034501	protein localization to kinetochore	8/2329	18/18866	0.000739566	0.010465	0.00894716	55920/283489/9183/55166/81620/57082/7272/983	8
BP	GO:0070200	establishment of protein localization to telomere	8/2329	18/18866	0.000739566	0.010465	0.00894716	1736/10694/10575/10576/908/10574/675/7203	8
BP	GO:1904872	regulation of telomerase RNA localization to Cajal body	8/2329	18/18866	0.000739566	0.010465	0.00894716	1736/10694/10575/10576/908/5073/10574/7203	8
BP	GO:0090316	positive regulation of intracellular protein transport	38/2329	182/18866	0.000747284	0.0105444	0.00901505	64328/10971/57506/7532/3799/10541/51496/7157/9585/7531/80184/23379/7529/3843/9777/9695/7159/54741/7533/3326/55754/6721/10075/10155/89781/3728/5108/9847/5621/79752/1869/596/7027/5366/983/3717/7029/5295	38
BP	GO:0009895	negative regulation of catabolic process	60/2329	323/18866	0.000748677	0.0105444	0.00901505	23367/10492/6599/406976/9967/1660/1457/1736/8473/10128/9529/9682/26986/1676/9097/7157/1982/26073/6125/282679/3192/6880/7327/27248/23049/55603/5073/51465/23077/4534/10949/3326/1981/6815/4194/6872/4904/8898/6135/56893/2475/140775/57589/9611/4170/11044/23118/25819/6048/493/11180/167153/1869/596/5294/863/4130/6093/55353/11213	60
BP	GO:0045652	regulation of megakaryocyte differentiation	21/2329	82/18866	0.000771943	0.0108468	0.00927355	2033/9739/11091/4297/55170/58508/861/865/8085/27327/26523/55904/8294/2551/64783/338382/2624/23112/192670/8364/4208	21
BP	GO:0098727	maintenance of cell number	35/2329	164/18866	0.000784891	0.0109669	0.00937621	8289/9126/23160/123169/678/6659/23091/8243/5978/26354/55183/3815/2146/6760/22823/23168/4609/5430/9968/5431/8202/4041/1499/2648/9412/84376/5440/7071/259266/2624/5108/9646/1656/9241/4851	35
BP	GO:0006356	regulation of transcription by RNA polymerase I	11/2329	31/18866	0.000787766	0.0109669	0.00937621	23160/84128/56919/55127/11137/4691/25926/468/6598/2475/5440	11
BP	GO:0018196	peptidyl-asparagine modification	11/2329	31/18866	0.000787766	0.0109669	0.00937621	6185/1650/201595/56886/58505/3998/90411/51465/84061/8813/6184	11
BP	GO:0045948	positive regulation of translational initiation	11/2329	31/18866	0.000787766	0.0109669	0.00937621	10657/23367/54915/51441/54505/127933/440275/1654/2475/253943/55364	11
BP	GO:0006979	response to oxidative stress	80/2329	458/18866	0.000794488	0.0110122	0.00941493	4602/328/5111/4548/5978/51765/9529/55270/5311/7486/8455/1938/10314/5893/4841/25/2146/57190/7157/6421/87178/7337/253827/22850/847/142/23411/2937/8575/468/488/84919/154807/11168/1499/836/10550/7507/890/952/57465/6667/10276/4170/9962/55364/10935/4353/2882/9833/57679/5621/6434/135112/10280/596/2950/3329/5052/7295/2353/100/4025/6770/983/1612/3717/2983/84181/3417/4217/10105/94241/8061/301/4929/1718/912…	80
BP	GO:0031497	chromatin assembly	40/2329	195/18866	0.000794673	0.0110122	0.00941493	54107/10664/83852/55320/10541/23522/7259/6418/7157/23270/50809/25842/4171/3159/8467/79682/22893/23411/10036/54069/11339/3070/55166/79829/54737/1060/546/8294/5928/10155/3014/23272/64105/4869/1786/57082/64946/8364/55355/8971	40
BP	GO:0016445	somatic diversification of immunoglobulins	18/2329	66/18866	0.000810609	0.0112072	0.0095817	79915/4436/5379/2956/55183/118460/54537/7374/165918/10721/4292/7468/7037/5591/3329/4683/9466/25939	18
BP	GO:1903902	positive regulation of viral life cycle	17/2329	61/18866	0.000858678	0.011844	0.0101261	23367/23633/7155/26986/51495/201626/64710/3838/1654/7153/10475/5586/10465/103/3312/4851/3123	17
BP	GO:0051656	establishment of organelle localization	76/2329	432/18866	0.000860592	0.011844	0.0101261	8729/283489/8615/8673/3799/6059/10128/84946/26985/3815/3998/10427/90411/3192/23243/8697/10464/6845/3676/10959/7514/23291/9183/4627/81/8723/10972/51068/4292/8832/1499/55166/3619/10097/55341/1060/9321/84376/55291/199953/22870/4976/55435/55153/9928/51203/26958/22872/26258/2624/23122/6850/55143/81620/157769/8936/5108/6683/4869/1062/122553/1778/23299/867/5294/11004/1063/3833/113130/55930/10253/161176/…	76
BP	GO:0140056	organelle localization by membrane tethering	36/2329	171/18866	0.000866258	0.0118948	0.0101695	57488/7532/11064/8615/8673/203068/26123/9657/55835/22919/7531/80184/9793/22995/54801/55125/152579/9702/23344/22863/10733/10383/9662/10142/10806/26258/1781/5108/115106/4957/3320/5341/1778/80321/10890/983	36
BP	GO:0031572	G2 DNA damage checkpoint	12/2329	36/18866	0.000874967	0.011987	0.0102484	4361/11073/79184/57551/63967/51514/51347/90381/672/1111/4683/983	12
BP	GO:0070507	regulation of microtubule cytoskeleton organization	39/2329	190/18866	0.000905089	0.0123716	0.0105772	64793/10432/26586/9475/3832/25/55835/22919/4733/3192/9793/7514/387/57551/1499/1104/348654/2648/22974/1859/10733/6491/10142/221150/126731/672/23122/6683/4869/3925/1778/23299/80321/1111/10982/4130/6093/2770/10615	39
BP	GO:0033047	regulation of mitotic sister chromatid segregation	19/2329	72/18866	0.000912369	0.0124429	0.0106381	23137/3192/8697/9183/8881/701/348654/55719/546/5925/5885/81620/1062/699/7272/1063/10783/891/991	19
BP	GO:0046825	regulation of protein export from nucleus	13/2329	41/18866	0.000921989	0.0124769	0.0106672	64328/5781/10541/51496/7157/29072/7531/57187/7514/55677/127933/57510/7295	13
BP	GO:0050434	positive regulation of viral transcription	13/2329	41/18866	0.000921989	0.0124769	0.0106672	2033/6882/1660/23076/64710/5430/5431/904/6598/25920/6667/5440/3725	13
BP	GO:0000244	spliceosomal tri-snRNP complex assembly	10/2329	27/18866	0.000925754	0.0124769	0.0106672	24148/27339/26830/100151683/10594/10772/26828/57819/26831/26829	10
BP	GO:0030490	maturation of SSU-rRNA	15/2329	51/18866	0.00092667	0.0124769	0.0106672	8602/55127/27340/83732/55226/9790/55720/79954/25926/153443/57050/28987/705/6202/6227	15
BP	GO:0001731	formation of translation preinitiation complex	6/2329	11/18866	0.000933491	0.0124769	0.0106672	1968/8562/8894/54505/1975/1983	6
BP	GO:0002328	pro-B cell differentiation	6/2329	11/18866	0.000933491	0.0124769	0.0106672	6659/2322/6654/11051/5591/4851	6
BP	GO:0007028	cytoplasm organization	6/2329	11/18866	0.000933491	0.0124769	0.0106672	3799/2120/6654/54700/57178/8061	6
BP	GO:0019042	viral latency	6/2329	11/18866	0.000933491	0.0124769	0.0106672	3054/3159/64710/7520/11168/2547	6
BP	GO:0051573	negative regulation of histone H3-K9 methylation	6/2329	11/18866	0.000933491	0.0124769	0.0106672	23028/23411/1789/6598/672/1786	6
BP	GO:0048545	response to steroid hormone	63/2329	346/18866	0.000953691	0.0127187	0.0108739	8289/2033/678/2354/5111/5978/6502/2322/5469/9125/10081/811/9113/23376/51569/8725/3192/7337/8031/387/10521/57178/142/11331/29966/23411/1789/790/7533/861/51341/865/6049/8085/836/1655/7298/952/164091/9611/84687/3490/7110/672/6879/55809/596/2950/2908/10499/3329/2353/4734/6770/3717/1978/3417/6155/2022/4851/4192/8061/301	63
BP	GO:0042255	ribosome assembly	18/2329	67/18866	0.000982409	0.0130728	0.0111767	54505/6125/83939/51187/51001/7520/1654/6135/708/23195/26284/220717/51119/51154/4869/6175/5591/6122	18
BP	GO:2000736	regulation of stem cell differentiation	27/2329	118/18866	0.00100762	0.0133786	0.0114382	4602/1021/678/51441/9739/5978/6938/25/8861/11137/3192/4297/3313/861/4005/865/5684/54517/5695/25920/8621/2624/5707/11051/5591/4851/3214	27
BP	GO:0035561	regulation of chromatin binding	9/2329	23/18866	0.00105379	0.0138999	0.0118838	23028/9044/1499/90780/79618/5530/81620/51053/151636	9
BP	GO:0048026	positive regulation of mRNA splicing, via spliceosome	9/2329	23/18866	0.00105379	0.0138999	0.0118838	4686/9967/27316/10262/27339/4691/29896/6434/3312	9
BP	GO:1902254	negative regulation of intrinsic apoptotic signaling pathway by p53 class mediator	9/2329	23/18866	0.00105379	0.0138999	0.0118838	79915/23028/6880/54700/23411/51616/51499/754/596	9
BP	GO:0044818	mitotic G2/M transition checkpoint	11/2329	32/18866	0.00106783	0.0140543	0.0120158	4361/11073/5884/57551/63967/4998/51347/90381/672/4683/983	11
BP	GO:0006352	DNA-templated transcription, initiation	48/2329	249/18866	0.00107713	0.0141459	0.0120941	6882/55814/6908/9329/64216/5469/25885/221830/7157/2967/83860/6880/6873/84172/860/9774/54700/8467/51616/9969/5430/9968/865/5431/6872/1499/7507/6598/55534/5440/8294/1871/6875/10155/7182/9439/6879/7019/2908/6722/983/8364/891/4851/653390/8061/4929/3725	48
BP	GO:0042795	snRNA transcription by RNA polymerase II	19/2329	73/18866	0.00109291	0.0143219	0.0122446	23248/6882/4686/6908/57508/25896/23379/6880/81556/22916/5430/55726/5431/904/6667/5440/905/5451/51574	19
BP	GO:0070936	protein K48-linked ubiquitination	16/2329	57/18866	0.00110844	0.0144939	0.0123917	92912/6502/54765/7324/7267/7337/7327/27246/6049/10210/10475/29089/84447/6048/151636/329	16
BP	GO:0042326	negative regulation of phosphorylation	83/2329	484/18866	0.00112634	0.0145307	0.0124231	10527/64793/8661/7532/55870/11171/407006/25998/5062/9113/1399/25/2218/11137/10771/3192/406900/10048/2776/5037/4771/3843/10019/10464/201626/23530/387/84327/9655/64798/122809/4609/10114/23411/3476/26524/3301/1981/84919/4041/836/1845/22863/2475/140775/10106/5925/51347/9611/5859/389119/11329/55364/10935/2305/408/65125/91663/5621/6879/4869/284/5576/103/867/11221/3087/863/2950/5591/10253/54625/891/1050…	83
BP	GO:0019081	viral translation	7/2329	15/18866	0.00112813	0.0145307	0.0124231	8661/8562/1660/8664/5725/440275/6741	7
BP	GO:0043144	snoRNA processing	7/2329	15/18866	0.00112813	0.0145307	0.0124231	1736/118460/23404/5073/11044/51574/56915	7
BP	GO:0045346	regulation of MHC class II biosynthetic process	7/2329	15/18866	0.00112813	0.0145307	0.0124231	113277/4799/23411/6879/4261/3717/566	7
BP	GO:0051290	protein heterotetramerization	7/2329	15/18866	0.00112813	0.0145307	0.0124231	11052/10056/5311/2193/6240/11051/6241	7
BP	GO:0071428	rRNA-containing ribonucleoprotein complex export from nucleus	7/2329	15/18866	0.00112813	0.0145307	0.0124231	6059/84946/7514/51068/55341/55153/4869	7
BP	GO:1904874	positive regulation of telomerase RNA localization to Cajal body	7/2329	15/18866	0.00112813	0.0145307	0.0124231	1736/10694/10575/10576/908/10574/7203	7
BP	GO:0090670	RNA localization to Cajal body	8/2329	19/18866	0.00113996	0.0145523	0.0124416	1736/10694/10575/10576/908/5073/10574/7203	8
BP	GO:0090671	telomerase RNA localization to Cajal body	8/2329	19/18866	0.00113996	0.0145523	0.0124416	1736/10694/10575/10576/908/5073/10574/7203	8
BP	GO:0090672	telomerase RNA localization	8/2329	19/18866	0.00113996	0.0145523	0.0124416	1736/10694/10575/10576/908/5073/10574/7203	8
BP	GO:0090685	RNA localization to nucleus	8/2329	19/18866	0.00113996	0.0145523	0.0124416	1736/10694/10575/10576/908/5073/10574/7203	8
BP	GO:1903706	regulation of hemopoiesis	85/2329	498/18866	0.00114188	0.0145523	0.0124416	4602/1021/2033/123169/678/6659/51441/10766/9739/407006/11091/5469/6654/6938/25/8861/6666/114803/4297/3313/387/57178/9655/4609/55170/407007/58508/861/5814/4005/149041/865/5684/22890/54517/440712/1499/8085/23774/27327/5695/2648/2547/2475/3071/57630/5925/26523/55904/8294/7071/54542/2551/64783/338382/2624/5707/146850/23112/6850/11051/54892/4352/192670/9646/11221/5579/5591/3606/2353/100/3205/8364/3202…	85
BP	GO:0045637	regulation of myeloid cell differentiation	50/2329	263/18866	0.00117888	0.0149597	0.0127899	1021/2033/123169/10766/9739/407006/11091/5469/8861/4297/3313/4609/55170/407007/58508/861/5814/865/440712/1499/8085/23774/27327/2475/3071/5925/26523/55904/8294/7071/2551/64783/338382/2624/23112/54892/4352/192670/9646/5579/5591/2353/3205/8364/3202/4208/5295/4211/3123/3725	50
BP	GO:0051298	centrosome duplication	18/2329	68/18866	0.00118432	0.0149597	0.0127899	10432/5311/9475/55835/163786/9793/7514/22995/55125/348654/2648/10733/675/9662/6491/23032/672/4869	18
BP	GO:0007080	mitotic metaphase plate congression	14/2329	47/18866	0.00118446	0.0149597	0.0127899	283489/3192/8697/10464/9183/1060/9928/55143/81620/1062/11004/3833/113130/891	14
BP	GO:0046677	response to antibiotic	14/2329	47/18866	0.00118446	0.0149597	0.0127899	23028/2146/7157/836/10097/3320/867/3309/10765/6770/4261/3717/4208/5321	14
BP	GO:0019985	translesion synthesis	13/2329	42/18866	0.00118626	0.0149597	0.0127899	5429/5111/26073/5983/5985/5427/22890/5980/51514/51455/6117/201973/9768	13
BP	GO:0001701	in utero embryonic development	68/2329	383/18866	0.00122546	0.0154218	0.013185	3054/4952/11232/57534/4436/8894/26259/5469/5311/9113/7516/100381270/7157/29072/27339/54880/54700/57448/85451/10959/57187/23168/4627/57178/2186/9837/4154/4904/1499/55845/2648/9412/84295/4097/5930/10733/675/6491/50515/2551/10155/79718/705/2624/79733/689/51639/9644/86/51119/57679/57498/284/54892/9646/10672/57820/6722/4683/100/338596/9133/891/1050/4188/9241/4851/8061	68
BP	GO:0019827	stem cell population maintenance	34/2329	162/18866	0.00125422	0.015751	0.0134664	8289/9126/23160/123169/678/6659/23091/8243/5978/26354/55183/3815/6760/22823/23168/4609/5430/9968/5431/8202/4041/1499/2648/9412/84376/5440/7071/259266/2624/5108/9646/1656/9241/4851	34
BP	GO:0034401	chromatin organization involved in regulation of transcription	33/2329	156/18866	0.00127595	0.0159697	0.0136534	8289/54107/83852/29028/55183/2146/55038/9792/57492/25842/3159/8467/57178/22893/23411/3070/1499/8085/79829/9643/54737/648/8294/10155/54454/8318/3014/23272/1786/84444/1111/8364/8971	33
BP	GO:0000395	mRNA 5'-splice site recognition	10/2329	28/18866	0.00128224	0.0159697	0.0136534	6426/101954264/101954272/100151683/11168/101954277/55015/26824/6631/101954267	10
BP	GO:0000470	maturation of LSU-rRNA	10/2329	28/18866	0.00128224	0.0159697	0.0136534	79707/9875/80135/84365/4736/54680/65008/8886/26156/6129	10
BP	GO:0031440	regulation of mRNA 3'-end processing	10/2329	28/18866	0.00128224	0.0159697	0.0136534	11052/123169/4686/10768/22916/904/11051/9646/6626/891	10
BP	GO:0006305	DNA alkylation	19/2329	74/18866	0.00130308	0.0161293	0.0137899	10664/200424/2146/4297/142/4609/1789/54069/3070/54737/546/55904/221656/10155/672/7490/1786/2353/143689	19
BP	GO:0006306	DNA methylation	19/2329	74/18866	0.00130308	0.0161293	0.0137899	10664/200424/2146/4297/142/4609/1789/54069/3070/54737/546/55904/221656/10155/672/7490/1786/2353/143689	19
BP	GO:0032481	positive regulation of type I interferon production	19/2329	74/18866	0.00130308	0.0161293	0.0137899	57506/2033/5781/10623/1660/56919/4361/29072/7520/85364/1654/1499/340061/2547/5440/661/6850/5591/3329	19
BP	GO:0006304	DNA modification	27/2329	120/18866	0.00131589	0.0162545	0.0138969	328/54726/10664/118460/200424/2146/4297/7374/142/4609/1789/54069/27350/3070/54737/546/55904/221656/10155/672/7490/56915/1786/2353/143689/1791/9760	27
BP	GO:0009755	hormone-mediated signaling pathway	40/2329	200/18866	0.0013201	0.0162731	0.0139128	8289/2033/26060/5781/6502/5469/9125/811/9113/23376/51569/7337/8031/387/10521/57178/142/11331/29966/23411/7533/861/26524/51341/865/6049/8085/1655/164091/9611/7110/672/6879/55809/2908/4734/3717/122042/7200/1393	40
BP	GO:1902807	negative regulation of cell cycle G1/S phase transition	29/2329	132/18866	0.00132435	0.0162922	0.0139291	1021/2033/6659/55571/55159/5111/57472/5311/5933/9125/2146/7157/835/4194/51499/10106/5925/5325/79733/91607/1869/596/7027/5591/983/7029/891/6154/28984	29
BP	GO:0043489	RNA stabilization	16/2329	58/18866	0.00135794	0.0166375	0.0142244	23367/10492/9967/1660/1736/26986/3192/55603/5073/10949/4904/2475/11044/25819/167153/1869	16
BP	GO:1903749	positive regulation of establishment of protein localization to mitochondrion	16/2329	58/18866	0.00135794	0.0166375	0.0142244	10971/7532/7157/7531/7529/7159/54741/7533/6721/10075/89781/1869/596/7027/5366/7029	16
BP	GO:0002312	B cell activation involved in immune response	20/2329	80/18866	0.00140475	0.0171761	0.0146848	79915/4436/2956/55183/118460/25/54537/7374/165918/4292/7468/139818/7037/3329/4683/100/9466/202309/4064/9452	20
BP	GO:2001233	regulation of apoptotic signaling pathway	72/2329	413/18866	0.00148684	0.0181431	0.0155115	10971/79915/7532/292/10059/1457/55023/407006/79886/9529/5062/23028/5326/4841/8725/7157/6421/7531/835/10771/7529/599/6880/9774/54700/57448/10116/64798/142/7159/407007/23411/51616/63979/8575/7533/3301/10955/1654/1499/51499/6135/57630/3190/5925/81618/4976/4170/5859/754/672/84447/2923/3655/9821/1869/596/7027/55486/2023/8567/2950/5366/10525/3717/7029/10105/9500/9241/6154/4929/6387	72
BP	GO:0032606	type I interferon production	28/2329	127/18866	0.00150171	0.0182874	0.015635	57506/2033/5781/10623/1660/56919/7528/4361/10146/5422/29072/7520/85364/1654/1499/54941/340061/2547/10475/5440/661/81844/79102/6850/7318/5591/3329/197358	28
BP	GO:0046794	transport of virus	17/2329	64/18866	0.00153848	0.0186975	0.0159855	23633/200576/55706/23279/3839/348995/9972/23225/2060/55746/53371/23511/9631/7514/3838/5903/23165	17
BP	GO:0006353	DNA-templated transcription, termination	19/2329	75/18866	0.00154667	0.0187592	0.0160383	4686/22828/1660/6908/7884/57466/25885/221830/2967/84172/51692/22916/5430/22803/6628/5440/6635/8458/11051	19
BP	GO:0044728	DNA methylation or demethylation	23/2329	98/18866	0.00161206	0.019503	0.0166743	328/54726/10664/200424/2146/4297/142/4609/1789/54069/27350/3070/54737/546/55904/221656/10155/672/7490/1786/2353/143689/9760	23
BP	GO:0010498	proteasomal protein catabolic process	82/2329	483/18866	0.00161447	0.019503	0.0166743	6599/201595/56886/8065/8473/6502/26259/9529/55270/57542/23190/23376/9097/11236/26046/7324/282679/27339/6880/8697/80020/7327/27252/8454/11101/9695/7514/23291/27248/84961/54467/8881/11146/57092/51465/9655/122809/23411/23197/23392/4534/80267/9781/7184/3326/701/5684/6815/6872/8078/54994/23607/1499/6135/5695/10210/56893/10475/9354/387921/10075/29978/9928/79718/7110/80311/6400/5707/84447/408/6048/10613…	82
BP	GO:0001824	blastocyst development	24/2329	104/18866	0.00165204	0.019917	0.0170282	3054/9113/100381270/27339/54880/57187/23168/9837/9412/84295/675/2551/79718/705/51639/86/51119/54892/9646/57820/6722/4683/100/338596	24
BP	GO:0007077	mitotic nuclear envelope disassembly	6/2329	12/18866	0.00167236	0.0200816	0.017169	7443/5579/983/10783/9133/891	6
BP	GO:2000105	positive regulation of DNA-dependent DNA replication	6/2329	12/18866	0.00167236	0.0200816	0.017169	54617/8317/546/79733/81620/30968	6
BP	GO:0070192	chromosome organization involved in meiotic cell cycle	18/2329	70/18866	0.00169523	0.0202026	0.0172724	55706/10592/4361/10111/9918/83990/701/4292/10051/3619/546/151246/23310/5885/192670/699/57820/23397	18
BP	GO:0001832	blastocyst growth	8/2329	20/18866	0.00169584	0.0202026	0.0172724	27339/23168/9837/675/51119/54892/9646/4683	8
BP	GO:0031498	chromatin disassembly	8/2329	20/18866	0.00169584	0.0202026	0.0172724	8289/6599/11198/6418/3159/196528/6601/6598	8
BP	GO:0043555	regulation of translation in response to stress	8/2329	20/18866	0.00169584	0.0202026	0.0172724	468/440275/1981/84919/1654/55364/4869/6197	8
BP	GO:0140053	mitochondrial gene expression	34/2329	165/18866	0.00173853	0.0206703	0.0176722	55157/84311/84273/64216/10128/11222/55173/55699/60488/4528/87178/78988/55005/158234/60493/55006/54460/57038/29088/28973/7284/54148/708/51253/84340/54931/26284/57129/51067/65008/29074/56652/7019/64949	34
BP	GO:0031365	N-terminal protein amino acid modification	10/2329	29/18866	0.00174292	0.0206817	0.017682	2033/60560/23173/6659/80018/80155/10988/79829/79612/51126	10
BP	GO:0031050	dsRNA processing	15/2329	54/18866	0.00175839	0.0207835	0.017769	9698/23369/7247/23264/7157/8575/1655/3181/26523/9611/5530/192670/4613/103/23405	15
BP	GO:0070918	production of small RNA involved in gene silencing by RNA	15/2329	54/18866	0.00175839	0.0207835	0.017769	9698/23369/7247/23264/7157/8575/1655/3181/26523/9611/5530/192670/4613/103/23405	15
BP	GO:0001732	formation of cytoplasmic translation initiation complex	7/2329	16/18866	0.00179298	0.0209458	0.0179078	8661/8894/8669/8664/8668/3646/1983	7
BP	GO:0009263	deoxyribonucleotide biosynthetic process	7/2329	16/18866	0.00179298	0.0209458	0.0179078	1633/6240/7298/1635/1841/132/6241	7
BP	GO:0010225	response to UV-C	7/2329	16/18866	0.00179298	0.0209458	0.0179078	5429/7528/7486/7157/675/55364/3150	7
BP	GO:0016446	somatic hypermutation of immunoglobulin genes	7/2329	16/18866	0.00179298	0.0209458	0.0179078	4436/5379/2956/7374/10721/4292/25939	7
BP	GO:0045342	MHC class II biosynthetic process	7/2329	16/18866	0.00179298	0.0209458	0.0179078	113277/4799/23411/6879/4261/3717/566	7
BP	GO:1902166	negative regulation of intrinsic apoptotic signaling pathway in response to DNA damage by p53 class mediator	7/2329	16/18866	0.00179298	0.0209458	0.0179078	79915/23028/6880/23411/51616/51499/596	7
BP	GO:0045185	maintenance of protein location	22/2329	93/18866	0.00180764	0.0210764	0.0180194	64083/57120/5311/375387/9113/55704/83860/3192/7529/10945/9913/54832/10210/4796/2901/9908/23515/9168/3309/7295/4188/5552	22
BP	GO:0035196	production of miRNAs involved in gene silencing by miRNA	14/2329	49/18866	0.00184621	0.0214431	0.0183329	9698/23369/23264/7157/8575/1655/3181/26523/9611/5530/192670/4613/103/23405	14
BP	GO:1900087	positive regulation of G1/S transition of mitotic cell cycle	14/2329	49/18866	0.00184621	0.0214431	0.0183329	693175/328/26057/407006/407007/1981/1654/55904/894/8318/6868/7027/28984/301	14
BP	GO:0071482	cellular response to light stimulus	28/2329	129/18866	0.00192098	0.0222686	0.0190387	2033/5429/23173/5111/7528/54617/23028/7157/10988/142/4609/23411/468/440275/22890/6872/51499/7507/163859/55364/993/167153/4869/1111/4734/6154/94241/5295	28
BP	GO:0043161	proteasome-mediated ubiquitin-dependent protein catabolic process	73/2329	424/18866	0.00194376	0.0224895	0.0192275	6599/201595/8065/8473/6502/26259/9529/57542/23190/23376/9097/26046/7324/6880/8697/80020/7327/27252/8454/9695/7514/23291/84961/54467/8881/11146/57092/51465/9655/122809/23411/23197/23392/4534/80267/9781/7184/3326/701/5684/6815/6872/8078/54994/23607/1499/6135/5695/10210/56893/10475/9354/387921/10075/29978/9928/79718/80311/6400/5707/84447/408/6048/10613/3309/863/4130/4734/983/329/891/1050/991	73
BP	GO:1902808	positive regulation of cell cycle G1/S phase transition	16/2329	60/18866	0.00200017	0.0230978	0.0197476	693175/328/26057/407006/2146/11331/407007/1981/1654/55904/894/8318/6868/7027/28984/301	16
BP	GO:0046777	protein autophosphorylation	45/2329	237/18866	0.00206579	0.0238099	0.0203564	29904/54822/7006/51765/2322/5062/4361/3815/25/10111/8805/23235/283629/23049/57551/790/127933/92597/440275/1654/6872/7867/2475/1859/51347/3643/84206/10155/55364/9748/9833/6850/7443/5911/7272/51701/4683/1612/3717/10783/5613/2022/11213/1436/3725	45
BP	GO:0000729	DNA double-strand break processing	9/2329	25/18866	0.00209376	0.0239491	0.0204755	56916/4361/5893/10111/83990/51444/1763/672/4683	9
BP	GO:0008334	histone mRNA metabolic process	9/2329	25/18866	0.00209376	0.0239491	0.0204755	4686/7884/51692/22916/6628/6635/11044/167153/6741	9
BP	GO:0039529	RIG-I signaling pathway	9/2329	25/18866	0.00209376	0.0239491	0.0204755	9698/23369/26057/11331/26065/85364/54941/708/329	9
BP	GO:0060148	positive regulation of posttranscriptional gene silencing	9/2329	25/18866	0.00209376	0.0239491	0.0204755	9698/23369/1660/7157/1981/57510/1655/8994/4613	9
BP	GO:0043903	regulation of symbiotic process	44/2329	231/18866	0.00215795	0.0245989	0.021031	23367/23633/57506/2033/7155/6882/1660/23076/407006/5978/26986/51495/201626/64710/9830/63901/407007/27350/5430/3838/440275/5431/1654/904/1655/7153/54737/6598/10475/25920/3609/6667/5440/10155/23272/5586/10465/103/596/3312/4851/3123/1436/3725	44
BP	GO:0006399	tRNA metabolic process	37/2329	186/18866	0.00215873	0.0245989	0.021031	10056/1615/79979/55157/2058/55699/4677/55226/1653/3376/6894/23404/55623/54482/2193/9255/5917/158234/54901/221078/10785/51520/127253/79731/116461/8518/55006/142940/57038/54517/92935/54931/51067/5859/91607/6741/16	37
BP	GO:0002562	somatic diversification of immune receptors via germline recombination within a single locus	17/2329	66/18866	0.0022076	0.024967	0.0213457	79915/9730/4436/2956/55183/118460/54537/7374/165918/4292/64421/7468/7037/5591/3329/4683/9466	17
BP	GO:0016444	somatic cell DNA recombination	17/2329	66/18866	0.0022076	0.024967	0.0213457	79915/9730/4436/2956/55183/118460/54537/7374/165918/4292/64421/7468/7037/5591/3329/4683/9466	17
BP	GO:0044766	multi-organism transport	17/2329	66/18866	0.0022076	0.024967	0.0213457	23633/200576/55706/23279/3839/348995/9972/23225/2060/55746/53371/23511/9631/7514/3838/5903/23165	17
BP	GO:1902579	multi-organism localization	17/2329	66/18866	0.0022076	0.024967	0.0213457	23633/200576/55706/23279/3839/348995/9972/23225/2060/55746/53371/23511/9631/7514/3838/5903/23165	17
BP	GO:0014009	glial cell proliferation	14/2329	50/18866	0.00227751	0.0256613	0.0219394	4602/6659/407006/1938/23376/4771/407007/5584/2475/3418/1869/23405/4851/1436	14
BP	GO:0061014	positive regulation of mRNA catabolic process	14/2329	50/18866	0.00227751	0.0256613	0.0219394	9698/54915/678/51441/9475/26986/87178/8570/149041/27327/253943/23112/10236/6093	14
BP	GO:0071480	cellular response to gamma radiation	10/2329	30/18866	0.00232866	0.0261888	0.0223903	23028/7486/7157/1958/7520/2547/79073/3014/3309/6154	10
BP	GO:0031057	negative regulation of histone modification	13/2329	45/18866	0.00238129	0.0266316	0.0227689	3720/11091/23028/6418/54880/22823/55170/23411/1789/6598/672/6879/1786	13
BP	GO:0051204	protein insertion into mitochondrial membrane	13/2329	45/18866	0.00238129	0.0266316	0.0227689	10971/7532/7157/7531/7529/7159/7533/3320/1869/596/7027/5366/7029	13
BP	GO:1901028	regulation of mitochondrial outer membrane permeabilization involved in apoptotic signaling pathway	13/2329	45/18866	0.00238129	0.0266316	0.0227689	10971/7532/292/7157/7531/7529/7159/7533/1869/596/7027/5366/7029	13
BP	GO:0002381	immunoglobulin production involved in immunoglobulin mediated immune response	16/2329	61/18866	0.00240604	0.0268585	0.0229629	79915/4436/2956/55183/118460/54537/7374/165918/4292/7468/7037/3329/4683/9466/202309/3123	16
BP	GO:0009262	deoxyribonucleotide metabolic process	11/2329	35/18866	0.00243286	0.027051	0.0231274	55270/1633/7374/6240/7298/1635/1841/132/100/25939/6241	11
BP	GO:0009126	purine nucleoside monophosphate metabolic process	12/2329	40/18866	0.00244067	0.027051	0.0231274	50808/10606/3615/1633/3251/5471/2618/5198/159/132/204/100	12
BP	GO:0016572	histone phosphorylation	12/2329	40/18866	0.00244067	0.027051	0.0231274	9031/9730/10270/3619/890/7443/8986/5579/1111/983/3717/891	12
BP	GO:0030220	platelet formation	8/2329	21/18866	0.00244572	0.027051	0.0231274	2033/5781/4627/836/4352/5591/6722/4208	8
BP	GO:0043984	histone H4-K16 acetylation	8/2329	21/18866	0.00244572	0.027051	0.0231274	3054/8473/11091/4297/55167/23411/55683/672	8
BP	GO:0032479	regulation of type I interferon production	27/2329	125/18866	0.00246345	0.0271475	0.0232099	57506/2033/5781/10623/1660/56919/7528/4361/5422/29072/7520/85364/1654/1499/54941/340061/2547/10475/5440/661/81844/79102/6850/7318/5591/3329/197358	27
BP	GO:1903578	regulation of ATP metabolic process	27/2329	125/18866	0.00246345	0.0271475	0.0232099	2033/55706/23279/10059/8473/348995/9972/23225/7157/55746/53371/23511/201626/9631/387/107075310/142/51341/5903/23165/3643/9611/863/2023/983/891/10105	27
BP	GO:0062197	cellular response to chemical stress	63/2329	360/18866	0.00257786	0.0283565	0.0242436	4602/328/5111/4548/5978/51765/9529/5311/10314/5893/4841/25/2146/7157/6421/55144/87178/22850/847/142/23411/1789/8575/468/7520/3301/488/1654/154807/1499/836/10550/890/2547/57465/10276/4170/84230/55364/10935/4353/2882/9833/92241/135112/10280/596/2950/5052/7295/2353/983/1612/3717/2983/84181/4217/10105/94241/301/4929/4313/3725	63
BP	GO:0016447	somatic recombination of immunoglobulin gene segments	15/2329	56/18866	0.00260275	0.0285262	0.0243887	79915/4436/2956/55183/118460/54537/7374/165918/4292/7468/7037/5591/3329/4683/9466	15
BP	GO:0030071	regulation of mitotic metaphase/anaphase transition	15/2329	56/18866	0.00260275	0.0285262	0.0243887	8697/9183/8881/701/348654/5925/5885/81620/1062/699/7272/1063/10783/891/991	15
BP	GO:0070585	protein localization to mitochondrion	30/2329	144/18866	0.00263675	0.0288464	0.0246624	10971/7532/9804/9868/10059/26515/100287932/3998/7157/293/7531/10953/7529/7159/54741/7533/3301/6721/9530/10075/89781/3320/100652748/1869/596/7027/55486/5366/3329/7029	30
BP	GO:0000209	protein polyubiquitination	60/2329	340/18866	0.00264262	0.0288581	0.0246725	92912/80829/6502/80351/26259/54765/57542/150726/7324/4012/7174/7267/27339/8697/7337/7327/27252/8454/23291/9830/84961/54467/8881/51465/165918/27246/149041/9781/865/223082/5684/1654/6872/6049/25831/1499/54941/5695/10210/51514/10475/9690/9354/5930/387921/10075/81844/54542/79102/29089/5707/672/84447/6048/51132/867/596/151636/4734/329	60
BP	GO:0006895	Golgi to endosome transport	7/2329	17/18866	0.00272569	0.0296045	0.0253106	8729/51552/2060/27252/54832/9980/55435	7
BP	GO:0016246	RNA interference	7/2329	17/18866	0.00272569	0.0296045	0.0253106	1660/7247/10658/8575/57510/103/23405	7
BP	GO:0033599	regulation of mammary gland epithelial cell proliferation	7/2329	17/18866	0.00272569	0.0296045	0.0253106	6239/11331/675/128239/90780/10765/3202	7
BP	GO:0050864	regulation of B cell activation	38/2329	195/18866	0.00276647	0.0298577	0.0255271	79915/678/4436/55183/118460/54537/149041/4292/57181/836/3071/952/3543/6850/7468/196/596/7037/100/9466/4208/4773/3493/28388/8660/28394/28467/28442/3501/28392/28448/28468/3503/28408/28444/28450/28423/3502	38
BP	GO:0006264	mitochondrial DNA replication	6/2329	13/18866	0.00278293	0.0298577	0.0255271	11232/1763/56652/201973/30968/92667	6
BP	GO:0035563	positive regulation of chromatin binding	6/2329	13/18866	0.00278293	0.0298577	0.0255271	23028/90780/79618/81620/51053/151636	6
BP	GO:0046040	IMP metabolic process	6/2329	13/18866	0.00278293	0.0298577	0.0255271	10606/3251/5471/2618/5198/159	6
BP	GO:0002204	somatic recombination of immunoglobulin genes involved in immune response	14/2329	51/18866	0.00278864	0.0298577	0.0255271	79915/4436/2956/55183/118460/54537/7374/165918/4292/7468/7037/3329/4683/9466	14
BP	GO:0002208	somatic diversification of immunoglobulins involved in immune response	14/2329	51/18866	0.00278864	0.0298577	0.0255271	79915/4436/2956/55183/118460/54537/7374/165918/4292/7468/7037/3329/4683/9466	14
BP	GO:0043628	ncRNA 3'-end processing	14/2329	51/18866	0.00278864	0.0298577	0.0255271	57508/1736/25896/118460/23404/81556/5073/54931/203522/11044/51574/56915/6741/6227	14
BP	GO:0045190	isotype switching	14/2329	51/18866	0.00278864	0.0298577	0.0255271	79915/4436/2956/55183/118460/54537/7374/165918/4292/7468/7037/3329/4683/9466	14
BP	GO:1902036	regulation of hematopoietic stem cell differentiation	18/2329	73/18866	0.00280202	0.0299478	0.0256041	4602/1021/51441/9739/6938/25/8861/4297/3313/861/4005/865/5684/54517/5695/2624/5707/5591	18
BP	GO:0001933	negative regulation of protein phosphorylation	75/2329	444/18866	0.00284105	0.0303112	0.0259148	10527/64793/8661/7532/55870/11171/407006/25998/5062/9113/1399/25/2218/11137/10771/406900/10048/2776/5037/4771/3843/10019/10464/23530/84327/9655/64798/122809/4609/10114/23411/3476/26524/3301/1981/84919/4041/836/1845/22863/2475/140775/10106/5925/51347/9611/5859/389119/11329/55364/2305/408/65125/91663/5621/6879/4869/284/5576/103/867/11221/3087/2950/5591/10253/54625/891/1050/9241/2022/11117/1848/1121…	75
BP	GO:0000959	mitochondrial RNA metabolic process	13/2329	46/18866	0.00295039	0.0314222	0.0268647	55157/64216/10128/79675/87178/201626/158234/60493/55006/54931/51067/56652/7019	13
BP	GO:0071479	cellular response to ionizing radiation	17/2329	68/18866	0.00310411	0.0329429	0.0281648	25896/54617/23028/7486/7157/1958/64710/23411/63979/7520/10635/2547/10276/79073/3014/3309/6154	17
BP	GO:1902369	negative regulation of RNA catabolic process	17/2329	68/18866	0.00310411	0.0329429	0.0281648	23367/10492/9967/1660/1736/10128/26986/3192/55603/5073/10949/4904/2475/11044/25819/167153/1869	17
BP	GO:0045840	positive regulation of mitotic nuclear division	15/2329	57/18866	0.00313644	0.0331692	0.0283582	55023/23137/3192/8697/8881/11331/4041/55719/5925/3643/51203/81620/113130/255324/28984	15
BP	GO:0075733	intracellular transport of virus	15/2329	57/18866	0.00313644	0.0331692	0.0283582	23633/55706/23279/3839/348995/9972/23225/55746/53371/23511/9631/7514/3838/5903/23165	15
BP	GO:1901216	positive regulation of neuron death	22/2329	97/18866	0.00317167	0.033483	0.0286266	4602/5978/25/7157/835/1386/1958/387/142/7159/468/23621/1499/836/2475/4170/2901/5621/4605/2353/4217/3725	22
BP	GO:0006612	protein targeting to membrane	40/2329	210/18866	0.00333183	0.0351124	0.0300196	6731/29927/6734/340481/6726/9697/23471/6125/282679/6845/23204/6194/5584/6230/4736/6135/6191/23463/8504/6202/6129/6229/6206/9847/51114/5621/6747/6207/3309/6222/6189/6164/6175/6218/6133/6227/6155/6122/6144/6154	40
BP	GO:0072655	establishment of protein localization to mitochondrion	29/2329	140/18866	0.0033554	0.035299	0.0301792	10971/7532/9804/9868/26515/100287932/3998/7157/293/7531/10953/7529/7159/54741/7533/3301/6721/9530/10075/89781/3320/100652748/1869/596/7027/55486/5366/3329/7029	29
BP	GO:0043434	response to peptide hormone	75/2329	447/18866	0.00338733	0.0355728	0.0304133	328/140710/6599/6431/26060/5781/7532/8615/29904/1979/55023/1967/9852/8473/5786/3030/6654/10768/5286/2058/9475/23235/57492/9550/87178/1958/5471/64710/5567/847/142/57727/54741/23411/3033/790/83990/5584/988/3416/54832/4041/55667/890/2475/6667/4976/3643/5928/6430/9847/2650/523/2806/5576/3727/3087/2950/5579/5591/6776/10890/114882/6093/6770/3717/1978/2770/64397/1393/5295/8660/301/4929/6387	75
BP	GO:0032868	response to insulin	51/2329	283/18866	0.00342222	0.0358546	0.0306541	140710/6599/6431/26060/5781/7532/8615/29904/1979/55023/9852/8473/5786/3030/6654/5286/2058/23235/9550/1958/5471/64710/847/142/57727/23411/3033/790/5584/3416/54832/55667/2475/6667/4976/3643/6430/9847/2650/523/2806/2950/5579/5591/10890/114882/6770/1978/64397/5295/8660	51
BP	GO:0036344	platelet morphogenesis	8/2329	22/18866	0.003432	0.0358546	0.0306541	2033/5781/4627/836/4352/5591/6722/4208	8
BP	GO:0051291	protein heterooligomerization	8/2329	22/18866	0.003432	0.0358546	0.0306541	11052/4144/10056/5311/2193/6240/11051/6241	8
BP	GO:0001776	leukocyte homeostasis	20/2329	86/18866	0.00352053	0.0367158	0.0313905	2322/6654/25/10019/149041/836/3071/54542/139818/4352/84636/6868/596/124976/5366/100/202309/4208/9133/301	20
BP	GO:0006383	transcription by RNA polymerase III	13/2329	47/18866	0.0036256	0.0377464	0.0322715	55814/10623/6908/9329/23379/112495/9330/2475/5440/661/2971/672/1050	13
BP	GO:0007091	metaphase/anaphase transition of mitotic cell cycle	15/2329	58/18866	0.00375684	0.038978	0.0333246	8697/9183/8881/701/348654/5925/5885/81620/1062/699/7272/1063/10783/891/991	15
BP	GO:1902099	regulation of metaphase/anaphase transition of cell cycle	15/2329	58/18866	0.00375684	0.038978	0.0333246	8697/9183/8881/701/348654/5925/5885/81620/1062/699/7272/1063/10783/891/991	15
BP	GO:0006839	mitochondrial transport	49/2329	271/18866	0.0037924	0.0392794	0.0335822	10971/506/1374/7532/9804/9868/292/26515/100287932/55186/3998/7157/293/7531/119559/51522/10953/7529/599/1386/87178/23456/10166/81034/10651/7159/54741/7533/509/6721/4976/9530/5565/10075/31/645843/89781/29074/30968/3320/100652748/1869/596/7027/55486/5366/3329/7029/10105	49
BP	GO:0015949	nucleobase-containing small molecule interconversion	9/2329	27/18866	0.00382052	0.0395027	0.0337731	25961/51727/56474/6240/7298/1635/1841/204/6241	9
BP	GO:0009167	purine ribonucleoside monophosphate metabolic process	11/2329	37/18866	0.00395061	0.0407779	0.0348634	50808/10606/3615/3251/5471/2618/5198/159/132/204/100	11
BP	GO:0010165	response to X-ray	10/2329	32/18866	0.00396906	0.0408285	0.0349066	4436/7516/7157/79184/64710/7520/836/2547/675/301	10
BP	GO:0061157	mRNA destabilization	10/2329	32/18866	0.00396906	0.0408285	0.0349066	9698/54915/678/51441/9475/8570/149041/253943/10236/6093	10
BP	GO:0061614	pri-miRNA transcription by RNA polymerase II	14/2329	53/18866	0.00409363	0.0420382	0.0359409	7528/26354/7157/1958/1655/6721/4775/2624/7490/2908/6722/2353/8061/3725	14
BP	GO:0006188	IMP biosynthetic process	5/2329	10/18866	0.00420326	0.0423699	0.0362245	10606/3251/5471/2618/5198	5
BP	GO:0033314	mitotic DNA replication checkpoint	5/2329	10/18866	0.00420326	0.0423699	0.0362245	11073/5884/63967/4998/90381	5
BP	GO:0034770	histone H4-K20 methylation	5/2329	10/18866	0.00420326	0.0423699	0.0362245	11137/64324/672/5926/7468	5
BP	GO:0034975	protein folding in endoplasmic reticulum	5/2329	10/18866	0.00420326	0.0423699	0.0362245	821/811/7184/2923/3309	5
BP	GO:0045348	positive regulation of MHC class II biosynthetic process	5/2329	10/18866	0.00420326	0.0423699	0.0362245	113277/23411/4261/3717/566	5
BP	GO:0045876	positive regulation of sister chromatid cohesion	5/2329	10/18866	0.00420326	0.0423699	0.0362245	23137/6421/2237/55719/5885	5
BP	GO:0075522	IRES-dependent viral translational initiation	5/2329	10/18866	0.00420326	0.0423699	0.0362245	8661/8562/8664/5725/6741	5
BP	GO:0090070	positive regulation of ribosome biogenesis	5/2329	10/18866	0.00420326	0.0423699	0.0362245	23160/84128/27292/55127/83732	5
BP	GO:1901838	positive regulation of transcription of nucleolar large rRNA by RNA polymerase I	5/2329	10/18866	0.00420326	0.0423699	0.0362245	11137/4691/25926/6598/2475	5
BP	GO:1990253	cellular response to leucine starvation	5/2329	10/18866	0.00420326	0.0423699	0.0362245	10985/51520/440275/2475/55364	5
BP	GO:2000234	positive regulation of rRNA processing	5/2329	10/18866	0.00420326	0.0423699	0.0362245	23160/84128/27292/55127/83732	5
BP	GO:0051099	positive regulation of binding	34/2329	174/18866	0.00427416	0.0430128	0.0367741	2033/4686/1660/23028/25/22919/8664/142/3326/1981/1054/51068/3416/6872/1499/6135/340061/5925/23032/10155/3646/90780/79618/26086/408/81620/3925/51053/23129/151636/7295/113130/3717/3200	34
BP	GO:0031958	corticosteroid receptor signaling pathway	6/2329	14/18866	0.00436524	0.0435657	0.0372468	8289/811/7533/2908/4734/3717	6
BP	GO:0032042	mitochondrial DNA metabolic process	6/2329	14/18866	0.00436524	0.0435657	0.0372468	11232/7157/142/1763/201973/92667	6
BP	GO:0044154	histone H3-K14 acetylation	6/2329	14/18866	0.00436524	0.0435657	0.0372468	4297/23411/23774/2648/7862/9678	6
BP	GO:0072350	tricarboxylic acid metabolic process	6/2329	14/18866	0.00436524	0.0435657	0.0372468	47/2746/3658/1431/3418/3417	6
BP	GO:0090239	regulation of histone H4 acetylation	6/2329	14/18866	0.00436524	0.0435657	0.0372468	55677/23411/6598/672/408/6879	6
BP	GO:0016574	histone ubiquitination	13/2329	48/18866	0.00442073	0.0439739	0.0375958	123169/23326/23028/7324/54880/29128/23512/165918/648/10075/6015/9646/151636	13
BP	GO:0043631	RNA polyadenylation	13/2329	48/18866	0.00442073	0.0439739	0.0375958	11052/123169/22828/10768/26986/87178/51692/904/11044/167153/11051/9646/6626	13
BP	GO:0019058	viral life cycle	59/2329	341/18866	0.00445225	0.0442144	0.0378015	23367/23633/27336/57506/200576/7155/55706/23279/3839/8673/407006/348995/9972/23225/9475/7913/2060/26986/55746/53371/51495/23511/201626/9631/7514/64710/9830/8411/63901/407007/27350/3838/3326/5903/440275/3416/1654/23165/1655/7153/54737/6598/10475/950/3609/10155/23272/5586/949/10465/103/596/3312/7037/1656/4734/983/4851/3123	59
BP	GO:0008543	fibroblast growth factor receptor signaling pathway	25/2329	118/18866	0.00454943	0.0451052	0.038563	693158/5781/4686/51552/1399/3185/860/10818/22916/7072/5430/5725/5431/80004/1499/9702/3187/25778/5440/3178/867/8036/53834/10253/9241	25
BP	GO:1904029	regulation of cyclin-dependent protein kinase activity	23/2329	106/18866	0.00466363	0.0459965	0.0393251	10527/54619/10983/5311/9113/3843/900/26524/3326/904/836/890/1164/894/993/905/6868/3087/9133/891/1050/28984/8900	23
BP	GO:0036503	ERAD pathway	22/2329	100/18866	0.0046881	0.0459965	0.0393251	201595/56886/23190/9097/11236/282679/80020/7327/9695/27248/51465/23197/23392/80267/7184/9354/29978/6400/84447/6048/10613/3309	22
BP	GO:0042493	response to drug	67/2329	397/18866	0.00469845	0.0459965	0.0393251	328/1374/6185/6731/2354/5978/4363/55270/3030/1938/811/1399/5205/7157/7150/5378/8443/6760/4297/5471/7514/387/847/4609/1789/3033/790/7520/5198/3326/1499/836/7298/55754/3071/952/4176/143/84687/8438/7804/11044/5530/408/5621/6868/5911/596/7037/3309/3329/1063/2353/100/6770/983/969/4208/891/219537/2022/4773/1393/4192/8061/1848/301	67
BP	GO:0000002	mitochondrial genome maintenance	8/2329	23/18866	0.00470038	0.0459965	0.0393251	11232/55186/7157/142/1763/4976/201973/92667	8
BP	GO:0006541	glutamine metabolic process	8/2329	23/18866	0.00470038	0.0459965	0.0393251	2746/2673/5471/56474/790/5198/54529/2744	8
BP	GO:0018027	peptidyl-lysine dimethylation	8/2329	23/18866	0.00470038	0.0459965	0.0393251	79723/55870/9739/29072/4297/23067/8085/6598	8
BP	GO:0042026	protein refolding	8/2329	23/18866	0.00470038	0.0459965	0.0393251	9529/3313/6782/5082/3320/3312/3309/3329	8
BP	GO:0070584	mitochondrion morphogenesis	8/2329	23/18866	0.00470038	0.0459965	0.0393251	10059/11232/26073/10989/87178/4534/4976/8936	8
BP	GO:0030521	androgen receptor signaling pathway	12/2329	43/18866	0.00471701	0.0460845	0.0394003	8289/2033/7337/387/10521/57178/23411/51341/6049/1655/9611/7110	12
BP	GO:0042769	DNA damage response, detection of DNA damage	11/2329	38/18866	0.00495073	0.0482897	0.0412856	6659/5111/60488/5983/56852/7398/142/5985/51514/6117/64949	11
BP	GO:0034605	cellular response to heat	26/2329	125/18866	0.00499344	0.0485882	0.0415409	2033/55706/23279/348995/9529/9972/23225/7531/55746/53371/23511/9631/23411/22797/3326/5903/488/23165/2475/9530/10728/6117/3320/3312/3329/947	26
BP	GO:0035690	cellular response to drug	17/2329	71/18866	0.00499746	0.0485882	0.0415409	5978/1399/7157/4297/5471/4609/790/3326/84687/5530/5621/5911/7037/3309/969/4208/1393	17
BP	GO:1901797	negative regulation of signal transduction by p53 class mediator	10/2329	33/18866	0.00507515	0.0492641	0.0421187	79915/23028/6880/54700/23411/51616/51499/1859/754/596	10
CC	GO:0098687	chromosomal region	110/2374	350/19559	5.22819e-22	3.73815e-19	2.76268e-19	55920/328/23244/9126/9031/283489/10664/253635/23279/79723/5111/4172/8243/4436/23137/80351/348995/55320/23028/23468/7486/4361/55183/55226/2146/5884/10111/3192/55746/4173/9793/56897/80335/6612/57187/4171/7514/23291/9918/2237/9183/4175/79075/142/79682/54069/7520/11339/79980/5431/701/3070/4735/55166/4998/55055/1763/3619/3181/84295/2547/1060/546/151246/64421/4176/9735/23310/5885/675/8294/10320/10728/2…	110
CC	GO:0005819	spindle	97/2374	367/19559	4.19422e-14	1.49944e-11	1.10816e-11	55920/10927/64793/9126/283489/292/8243/54617/5311/79848/57542/11073/26586/9113/55183/9391/9657/3832/55171/55207/22919/9585/8317/3192/27339/23172/79184/9793/57448/3796/9183/8881/4627/54801/27130/8556/26524/79980/701/440145/114791/1499/4735/3619/2648/10210/22974/1729/5925/9735/199953/10733/143/5885/9611/9928/221150/23170/79718/51203/259266/126731/9857/55689/23122/23157/55143/29127/51164/51119/10735…	97
CC	GO:0000775	chromosome, centromeric region	63/2374	196/19559	1.11561e-13	1.97576e-11	1.46018e-11	55920/23244/9126/9031/283489/10664/253635/23279/79723/8243/348995/55320/23468/3192/55746/9793/6612/7514/23291/9918/9183/79075/79682/54069/11339/79980/701/3070/4735/55166/55055/3619/84295/1060/546/151246/9735/23310/5885/10320/221150/11130/27309/23122/23157/55143/81620/51164/64151/10735/64105/1062/1786/57082/699/7272/64946/11004/1063/113130/55355/891/10615	63
CC	GO:0005657	replication fork	34/2374	71/19559	1.27149e-13	1.97576e-11	1.46018e-11	5429/9031/56916/5111/4172/7486/4361/7516/7157/5422/5983/7150/27339/54465/29128/56852/5557/8467/11169/5985/5814/988/7507/4796/8914/6117/10286/8318/3014/51659/201973/55388/1786/4683	34
CC	GO:0005681	spliceosomal complex	62/2374	192/19559	1.38165e-13	1.97576e-11	1.46018e-11	5411/10492/27336/6426/8899/24148/8539/10081/51747/10946/26986/27316/51729/1665/143884/55119/3185/3192/10262/27339/4691/10594/11193/6427/27258/988/6628/55660/4904/23517/1655/51645/3187/55015/3181/3190/140890/29896/6631/57703/6635/57819/10286/23524/10250/55760/51639/85437/3178/84844/10236/23398/23020/8458/10465/6434/103/220988/6626/3312/23451/6633	62
CC	GO:0061695	transferase complex, transferring phosphorus-containing groups	73/2374	253/19559	5.95429e-13	7.09553e-11	5.24395e-11	1021/54107/23248/8295/123169/6882/10623/54619/6908/5111/4172/11232/10983/5286/25885/221830/5634/7157/5422/9779/30837/2967/83860/6880/6873/84172/23168/5557/9655/122809/900/51616/5427/5430/51341/23085/5431/904/6872/5980/1763/890/2648/22863/140775/5631/5925/5440/1164/3643/5565/661/6875/54108/8621/894/146850/905/55209/167153/6879/5576/9646/9821/5294/5214/983/9133/891/4217/5426/5295/8900	73
CC	GO:0000793	condensed chromosome	66/2374	222/19559	1.71102e-12	1.74768e-10	1.29162e-10	9126/9031/283489/10664/253635/8243/23137/10128/348995/55320/10592/10270/11073/55183/10111/3192/55746/9793/9918/9183/8467/79682/79980/84365/701/4292/10051/4288/1104/4735/55055/3619/7153/84295/442582/65083/1060/546/151246/9735/23310/5885/675/221150/11130/3014/672/23122/23157/81620/64151/10735/64105/54892/1062/57082/699/64946/57820/1111/11004/23397/1063/55355/891/10615	66
CC	GO:0016607	nuclear speck	98/2374	401/19559	5.05066e-12	4.51403e-10	3.33609e-10	5411/328/6431/11052/6426/10432/8899/6239/23091/9967/84271/9739/23137/24148/8539/55840/7486/6651/51747/5994/6938/10946/4841/58517/6421/1665/3192/27339/9774/50809/204851/57187/10915/10521/57223/23067/5073/10594/11193/54801/29890/11273/6432/8394/6427/468/11339/10772/79595/988/64318/10051/55660/56252/23517/9295/23774/10210/163859/9321/1859/140890/55534/5930/55904/57703/661/64783/6430/57459/6015/23360…	98
CC	GO:0071013	catalytic step 2 spliceosome	35/2374	87/19559	2.88316e-11	2.29051e-09	1.69281e-09	5411/10492/6426/8899/24148/10946/26986/27316/3185/3192/27339/10594/27258/988/6628/23517/1655/51645/3187/3181/3190/57703/6635/57819/10286/23524/10250/51639/3178/10236/23398/23020/220988/23451/6633	35
CC	GO:0036464	cytoplasmic ribonucleoprotein granule	63/2374	233/19559	4.41063e-10	3.1536e-08	2.33067e-08	9698/23367/4076/26019/55802/23369/51441/1660/255967/84271/23215/7812/203068/57532/9125/113251/10146/9475/26986/1653/23741/7150/3192/55629/53339/4691/9931/8570/11273/26065/7072/27350/4154/27258/149041/127933/6194/1981/1654/4904/27327/6191/3190/26523/54542/84206/57819/8994/9908/25819/23112/57523/192670/550643/85463/79752/1656/6175/6093/143689/64332/1992/1511	63
CC	GO:0000781	chromosome, telomeric region	49/2374	164/19559	1.00511e-09	6.16487e-08	4.55615e-08	328/5111/4172/4436/23137/80351/23028/23468/7486/4361/55183/55226/2146/5884/10111/4173/56897/80335/57187/4171/2237/4175/142/7520/5431/4998/1763/3181/2547/546/64421/4176/675/8294/10728/6117/79618/3014/54433/6741/4174/84444/79991/1111/5591/4683/983/8364/9401	49
CC	GO:0035770	ribonucleoprotein granule	64/2374	243/19559	1.03466e-09	6.16487e-08	4.55615e-08	9698/23367/4076/26019/55802/23369/51441/1660/255967/84271/23215/7812/203068/57532/9125/113251/10146/9475/26986/1653/23741/7150/3192/55629/53339/4691/9931/8570/11273/26065/7072/27350/4154/27258/60493/149041/127933/6194/1981/1654/4904/27327/6191/3190/26523/54542/84206/57819/8994/9908/25819/23112/57523/192670/550643/85463/79752/1656/6175/6093/143689/64332/1992/1511	64
CC	GO:0043596	nuclear replication fork	21/2374	41/19559	1.27276e-09	7.00017e-08	5.17348e-08	9031/56916/5111/4172/5422/7150/27339/54465/5557/8467/11169/5814/988/7507/4796/8914/6117/10286/8318/51659/55388	21
CC	GO:0005635	nuclear envelope	103/2374	473/19559	1.73292e-09	8.85026e-08	6.54079e-08	10927/64328/10527/1434/92140/23306/55749/55706/23369/26057/23279/3839/55787/57508/10983/55326/10128/80351/348995/203068/23468/55120/9972/23225/811/55183/23190/2733/11260/286148/25/9538/7157/5422/83860/2776/55746/3843/84823/53371/51495/23511/8089/9631/7514/23291/55705/79647/6240/142/55219/9330/23411/29890/3708/5903/83990/55379/84629/22890/169714/6049/4904/1104/23165/7112/51514/2475/23/199953/3643/…	103
CC	GO:0034399	nuclear periphery	41/2374	131/19559	5.10969e-09	2.43562e-07	1.80004e-07	4602/10238/9126/22828/5111/8243/7528/9972/10270/4841/11260/7157/5422/6421/3192/284695/84823/8089/29128/11331/790/468/55660/11016/23165/3181/64395/5885/25932/9360/10250/84844/10735/6304/2672/23515/1822/24137/1063/3717/1791	41
CC	GO:0000779	condensed chromosome, centromeric region	39/2374	122/19559	6.16348e-09	2.7543e-07	2.03557e-07	283489/253635/8243/348995/55320/3192/55746/9793/9918/9183/79682/79980/701/4735/55055/3619/84295/1060/546/151246/9735/23310/5885/221150/11130/23122/23157/81620/64151/64105/1062/57082/699/64946/11004/1063/55355/891/10615	39
CC	GO:0000776	kinetochore	42/2374	137/19559	6.64235e-09	2.7937e-07	2.06468e-07	283489/253635/23279/8243/348995/55320/23468/3192/55746/9793/6612/7514/23291/9183/79682/79980/701/4735/55166/55055/3619/84295/1060/151246/9735/221150/11130/23122/23157/81620/51164/64105/1062/57082/699/7272/64946/11004/1063/55355/891/10615	42
CC	GO:0005667	transcription regulator complex	91/2374	413/19559	8.40059e-09	3.3369e-07	2.46614e-07	328/3182/2033/8295/10432/6882/55814/6908/1457/9329/1388/5978/7528/5933/23028/23468/5994/6938/4841/8861/7157/6421/1108/2967/80155/83860/3192/7529/6880/6873/860/23013/3159/25929/5993/142/112495/10725/9330/51616/8804/468/861/51341/4005/865/23186/6872/1499/2648/2547/5925/79612/6667/9611/1871/4775/5928/6875/57459/10155/79718/8994/90780/91748/4800/79733/9439/5926/51132/5451/196/6879/2672/3727/55809/186…	91
CC	GO:0090734	site of DNA damage	30/2374	82/19559	1.04775e-08	3.94286e-07	2.91397e-07	5429/56916/55159/8065/23137/23468/4361/55183/23376/7157/10111/27339/1386/54537/56852/165918/142/7520/51341/51444/55719/10097/56893/8914/6117/3014/79968/91607/4683/25939	30
CC	GO:0016363	nuclear matrix	35/2374	109/19559	3.20456e-08	1.14563e-06	8.46679e-07	4602/10238/9126/22828/8243/7528/10270/4841/11260/7157/5422/6421/3192/284695/8089/29128/11331/790/55660/3181/64395/5885/25932/9360/10250/84844/10735/6304/2672/23515/1822/24137/1063/3717/1791	35
CC	GO:0000784	nuclear chromosome, telomeric region	38/2374	124/19559	3.46696e-08	1.18042e-06	8.72389e-07	328/5111/4172/4436/80351/23028/23468/4361/55226/10111/4173/56897/80335/57187/4171/2237/4175/142/7520/5431/4998/1763/2547/546/64421/4176/675/8294/6117/79618/54433/6741/4174/79991/5591/4683/983/8364	38
CC	GO:0000777	condensed chromosome kinetochore	34/2374	106/19559	5.16796e-08	1.60875e-06	1.18895e-06	283489/253635/8243/348995/55320/3192/55746/9793/9183/79682/79980/701/4735/55055/3619/84295/1060/151246/9735/221150/11130/23122/23157/81620/64105/1062/57082/699/64946/11004/1063/55355/891/10615	34
CC	GO:1904949	ATPase complex	28/2374	78/19559	5.175e-08	1.60875e-06	1.18895e-06	8289/54107/55193/6599/79915/8295/10847/1457/7528/54617/6595/1108/6760/57492/81611/55274/8467/2186/10042/6601/51341/6598/5925/4798/5928/57459/54108/86	28
CC	GO:0010494	cytoplasmic stress granule	27/2374	74/19559	6.02448e-08	1.723e-06	1.27338e-06	9698/23367/4076/23369/23215/7812/57532/113251/10146/26986/1653/8570/11273/26065/7072/4154/149041/1981/1654/4904/3190/54542/9908/79752/1656/6093/1511	27
CC	GO:0070603	SWI/SNF superfamily-type complex	27/2374	74/19559	6.02448e-08	1.723e-06	1.27338e-06	8289/54107/55193/6599/8295/10847/1457/7528/54617/6595/1108/6760/57492/81611/55274/8467/2186/10042/6601/51341/6598/5925/4798/5928/57459/54108/86	27
CC	GO:0031248	protein acetyltransferase complex	31/2374	93/19559	7.36948e-08	1.95155e-06	1.44229e-06	54107/2033/8295/3054/60560/117143/8473/11091/80018/23326/23522/26009/80155/6880/6873/8089/9913/55167/9767/51616/23774/9643/2648/55683/79612/51126/7862/9678/55689/86/6879	31
CC	GO:1902493	acetyltransferase complex	31/2374	93/19559	7.36948e-08	1.95155e-06	1.44229e-06	54107/2033/8295/3054/60560/117143/8473/11091/80018/23326/23522/26009/80155/6880/6873/8089/9913/55167/9767/51616/23774/9643/2648/55683/79612/51126/7862/9678/55689/86/6879	31
CC	GO:0030496	midbody	48/2374	182/19559	1.16805e-07	2.9827e-06	2.20436e-06	55920/283489/54902/11064/51097/55226/55207/9585/9816/3192/23172/57448/2079/387/55958/127933/7184/4735/3619/10210/1060/25932/5898/9928/23170/27309/259266/23111/5586/1500/23157/55143/29127/382/6683/23331/54443/1062/5911/10112/3309/24137/1063/55165/983/9055/2770/10615	48
CC	GO:0034708	methyltransferase complex	33/2374	105/19559	1.39296e-07	3.43437e-06	2.53817e-06	3054/3720/23269/23091/9739/11091/23468/9682/54881/83732/2146/6880/4297/80335/22823/2079/23512/23067/23411/29890/10785/58508/1207/55006/6628/6872/8085/6635/64783/5928/6879/10765/6633	33
CC	GO:0031965	nuclear membrane	68/2374	301/19559	2.36184e-07	5.62905e-06	4.16015e-06	10927/92140/23306/55706/23369/26057/55787/57508/10983/10128/9972/23225/55183/2733/286148/25/9538/7157/83860/2776/55746/84823/53371/51495/8089/9631/7514/79647/55219/9330/23411/3708/5903/83990/84629/22890/169714/6049/4904/1104/23165/51514/199953/64783/23592/79073/894/79188/11044/64215/27346/4925/5108/6683/5621/6434/4352/10280/9821/596/283417/5023/10434/114882/161176/489/55914/3930	68
CC	GO:0000922	spindle pole	44/2374	165/19559	2.76319e-07	6.3669e-06	4.70546e-06	64793/9126/8243/79848/11073/26586/9113/3832/55171/9585/3192/23172/79184/9793/57448/3796/9183/8556/26524/79980/114791/1499/10210/22974/9735/199953/10733/5885/259266/51164/51119/10735/115106/4957/4869/56271/23331/1063/140609/10783/891/9055/10615/991	44
CC	GO:0035861	site of double-strand break	23/2374	61/19559	2.84952e-07	6.3669e-06	4.70546e-06	5429/56916/55159/23137/4361/55183/23376/7157/10111/27339/1386/54537/56852/165918/142/51341/51444/55719/10097/8914/3014/4683/25939	23
CC	GO:0120114	Sm-like protein family complex	34/2374	114/19559	3.67285e-07	7.95783e-06	5.88124e-06	27336/11171/24148/96764/51747/10946/101954264/26830/101954272/25929/100151683/10594/27258/1207/6628/55660/101954277/55015/26824/26828/6631/6635/57819/26831/50628/51639/84844/23020/10465/6626/23451/26829/6633/101954267	34
CC	GO:0030532	small nuclear ribonucleoprotein complex	31/2374	102/19559	7.5246e-07	1.58238e-05	1.16946e-05	27336/24148/96764/51747/10946/101954264/26830/101954272/100151683/10594/27258/6628/55660/101954277/55015/26824/26828/6631/6635/57819/26831/50628/51639/84844/23020/10465/6626/23451/26829/6633/101954267	31
CC	GO:0000792	heterochromatin	26/2374	78/19559	8.14277e-07	1.66345e-05	1.22938e-05	7155/9031/56916/23076/23468/29128/3159/23512/23411/3070/3619/54737/1060/546/23310/115426/10320/10155/6015/84733/7317/23272/79968/6304/1786/1656	26
CC	GO:0097525	spliceosomal snRNP complex	29/2374	96/19559	1.94263e-06	3.85828e-05	2.85146e-05	27336/24148/51747/10946/101954264/26830/101954272/100151683/10594/27258/6628/55660/101954277/55015/26824/26828/6631/6635/57819/26831/51639/84844/23020/10465/6626/23451/26829/6633/101954267	29
CC	GO:0000123	histone acetyltransferase complex	26/2374	83/19559	3.07227e-06	5.93696e-05	4.38771e-05	54107/2033/8295/3054/117143/8473/11091/23326/23522/26009/6880/6873/8089/9913/55167/9767/51616/23774/9643/2648/55683/7862/9678/55689/86/6879	26
CC	GO:0022626	cytosolic ribosome	31/2374	110/19559	4.44179e-06	8.29858e-05	6.13307e-05	54505/113251/6125/83939/51187/6166/6194/440275/1654/6230/4736/6135/6191/65008/6202/220717/6129/6229/6206/6207/6222/6189/6164/6175/6218/6133/6227/6155/6122/6144/6154	31
CC	GO:0042470	melanosome	30/2374	105/19559	4.64256e-06	8.29858e-05	6.13307e-05	821/23193/6856/1200/7531/10575/7529/2315/813/7184/3326/10972/9601/6509/191/6184/84079/2194/2923/89781/27044/3320/10672/3312/7037/3309/5052/10130/5874/10981	30
CC	GO:0048770	pigment granule	30/2374	105/19559	4.64256e-06	8.29858e-05	6.13307e-05	821/23193/6856/1200/7531/10575/7529/2315/813/7184/3326/10972/9601/6509/191/6184/84079/2194/2923/89781/27044/3320/10672/3312/7037/3309/5052/10130/5874/10981	30
CC	GO:0090575	RNA polymerase II transcription regulator complex	40/2374	161/19559	6.36816e-06	0.000111055	8.20749e-05	3182/8295/6882/6908/1388/6938/4841/8861/7157/6421/2967/83860/3192/6880/6873/3159/25929/51616/468/861/865/6872/1499/2648/5925/1871/6875/10155/90780/4800/79733/5451/6879/3727/1869/7027/2353/7029/1050/3725	40
CC	GO:0030880	RNA polymerase complex	30/2374	108/19559	8.63885e-06	0.000147066	0.000108689	23248/8295/123169/6882/10623/6908/4172/25885/221830/7157/5422/2967/83860/6880/6873/84172/23168/5557/51616/5430/5431/6872/2648/5440/661/6875/55209/167153/6879/9646	30
CC	GO:0000794	condensed nuclear chromosome	29/2374	103/19559	9.10614e-06	0.000147975	0.000109361	9126/8243/10128/55320/11073/10111/9918/79980/84365/701/4292/10051/1104/3619/65083/1060/546/151246/23310/5885/675/3014/672/64105/699/57820/1111/23397/891	29
CC	GO:0055029	nuclear DNA-directed RNA polymerase complex	29/2374	103/19559	9.10614e-06	0.000147975	0.000109361	23248/8295/123169/6882/10623/6908/4172/25885/221830/7157/5422/2967/83860/6880/6873/84172/23168/5557/51616/5430/5431/6872/2648/5440/661/6875/55209/6879/9646	29
CC	GO:0030684	preribosome	24/2374	78/19559	1.02586e-05	0.000162998	0.000120463	8602/23076/55127/84946/27340/134430/51602/83732/9790/55720/22984/79954/153443/7520/57050/80135/9724/28987/65083/23195/705/26156/51154/5591	24
CC	GO:0000428	DNA-directed RNA polymerase complex	29/2374	104/19559	1.11784e-05	0.000173752	0.000128411	23248/8295/123169/6882/10623/6908/4172/25885/221830/7157/5422/2967/83860/6880/6873/84172/23168/5557/51616/5430/5431/6872/2648/5440/661/6875/55209/6879/9646	29
CC	GO:0005844	polysome	22/2374	69/19559	1.26224e-05	0.000192021	0.000141913	23367/26019/60560/1660/57532/1938/811/113251/4733/87178/85451/10985/440275/1981/4736/6135/6191/26523/55364/689/7411/6227	22
CC	GO:0042555	MCM complex	8/2374	12/19559	1.46532e-05	0.000213817	0.000158022	4172/4173/4171/4175/84515/4176/4796/4174	8
CC	GO:0071564	npBAF complex	8/2374	12/19559	1.46532e-05	0.000213817	0.000158022	8289/6599/6595/6760/55274/6601/6598/86	8
CC	GO:0000307	cyclin-dependent protein kinase holoenzyme complex	16/2374	43/19559	2.21649e-05	0.000304767	0.000225238	1021/54619/5111/10983/900/904/890/5925/1164/8621/894/905/983/9133/891/8900	16
CC	GO:0009295	nucleoid	16/2374	43/19559	2.21649e-05	0.000304767	0.000225238	506/292/11232/64216/10128/3030/26073/3313/60493/55379/7284/1763/54931/56652/7019/7416	16
CC	GO:0042645	mitochondrial nucleoid	16/2374	43/19559	2.21649e-05	0.000304767	0.000225238	506/292/11232/64216/10128/3030/26073/3313/60493/55379/7284/1763/54931/56652/7019/7416	16
CC	GO:0044391	ribosomal subunit	43/2374	187/19559	2.32798e-05	0.000314058	0.000232105	84311/11222/55173/54505/113251/60488/6125/83939/51187/78988/6166/54460/6194/1654/29088/28973/6230/4736/54148/6135/51253/6191/57129/65008/6202/220717/6129/29074/6229/6206/6207/64949/6222/6189/6164/6175/6218/6133/6227/6155/6122/6144/6154	43
CC	GO:0016442	RISC complex	9/2374	16/19559	2.88919e-05	0.000375594	0.000277583	1660/57510/27327/26523/8994/27044/192670/1656/23405	9
CC	GO:0031332	RNAi effector complex	9/2374	16/19559	2.88919e-05	0.000375594	0.000277583	1660/57510/27327/26523/8994/27044/192670/1656/23405	9
CC	GO:0005684	U2-type spliceosomal complex	26/2374	93/19559	2.97103e-05	0.000379337	0.000280349	27336/24148/51747/10946/1665/10262/27339/10594/11193/27258/988/6628/55660/51645/55015/6631/57703/6635/57819/10286/23524/51639/84844/23020/23451/6633	26
CC	GO:0051233	spindle midzone	14/2374	36/19559	4.05052e-05	0.000508092	0.000375505	55920/55183/55207/22919/9585/3192/3619/9928/55143/29127/146909/1062/10982/9055	14
CC	GO:0005759	mitochondrial matrix	87/2374	473/19559	4.44332e-05	0.000547755	0.000404818	506/25961/292/27292/55157/11232/60558/84311/6059/64216/10128/11222/55173/2746/3030/50808/55699/60488/90624/7157/26073/64087/55066/1431/56922/1737/87178/201626/3313/78988/160760/133686/55347/11112/3033/79731/60493/55006/54460/55379/57038/29088/28973/7284/54148/1763/7298/708/92935/51253/34/509/84340/2271/594/54931/26284/3418/57129/51067/8803/5859/219/10935/29074/56652/1892/26027/201973/25902/3712/7…	87
CC	GO:0032993	protein-DNA complex	45/2374	205/19559	5.13387e-05	0.000622155	0.000459804	2033/6908/5111/4172/1388/5469/23522/5893/5422/6666/7150/2967/27339/50809/5557/23512/84656/142/9837/7520/5814/988/1499/7507/54737/2547/6667/8294/221656/4796/6117/10286/8318/4800/3014/51659/3728/4869/3727/79991/3087/5591/2353/8364/8971	45
CC	GO:0035578	azurophil granule lumen	25/2374	91/19559	5.7636e-05	0.000686829	0.000507601	47/203068/10694/2665/10576/400668/23197/8804/79980/10097/387263/387921/10383/5036/4353/5707/10493/1778/6036/566/5657/51816/1511/6037/1991	25
CC	GO:0016605	PML body	27/2374	102/19559	6.03512e-05	0.000707395	0.0005228	55159/9994/23137/23468/4361/11073/7157/6693/27252/6612/204851/10114/23411/6049/10210/2475/546/5925/3646/6117/79618/2000/6304/23515/4683/4261/94241	27
CC	GO:0017101	aminoacyl-tRNA synthetase multienzyme complex	7/2374	11/19559	8.13085e-05	0.000937671	0.000692986	1615/2058/3376/9255/5917/51520/5859	7
CC	GO:0035097	histone methyltransferase complex	22/2374	77/19559	8.31753e-05	0.000943973	0.000697644	3054/3720/23269/9739/11091/23468/9682/54881/2146/6880/4297/80335/22823/23512/23067/23411/58508/6872/8085/5928/6879/10765	22
CC	GO:0000932	P-body	24/2374	88/19559	9.12271e-05	0.00101918	0.000753224	9698/4076/55802/51441/255967/9125/7150/55629/53339/26065/27350/27258/149041/27327/26523/54542/84206/57819/8994/25819/23112/192670/550643/1656	24
CC	GO:0005720	nuclear heterochromatin	13/2374	34/19559	9.36225e-05	0.00102985	0.000761109	23468/29128/23512/23411/54737/1060/546/23310/115426/10320/10155/6015/6304	13
CC	GO:0071011	precatalytic spliceosome	17/2374	53/19559	0.000110001	0.00114822	0.000848591	24148/10946/55119/10262/10594/11193/27258/6628/57703/6635/57819/23524/51639/84844/23020/23451/6633	17
CC	GO:0005682	U5 snRNP	10/2374	22/19559	0.000110034	0.00114822	0.000848591	24148/26830/10594/6628/26828/6635/26831/23020/26829/6633	10
CC	GO:0042575	DNA polymerase complex	10/2374	22/19559	0.000110034	0.00114822	0.000848591	54107/4172/11232/5422/5557/5427/5980/1763/54108/5426	10
CC	GO:0030894	replisome	11/2374	26/19559	0.000110807	0.00114822	0.000848591	5111/4172/5422/27339/5557/5814/988/7507/4796/6117/10286	11
CC	GO:0001650	fibrillar center	31/2374	129/19559	0.000130174	0.00132963	0.000982664	92140/9221/23160/123169/6239/8615/9730/1736/55127/3815/4841/51602/9875/7150/8467/63901/79980/8161/23607/4782/27125/1316/6598/6875/31/8204/54433/84245/55809/79991/55536	31
CC	GO:0030688	preribosome, small subunit precursor	8/2374	15/19559	0.000135766	0.00136722	0.00101045	8602/23076/84946/27340/83732/55720/28987/705	8
CC	GO:0005840	ribosome	54/2374	270/19559	0.000139264	0.00138297	0.00102208	23367/328/821/1660/84311/11222/55173/57532/1938/54505/113251/60488/6125/87178/83939/10985/51187/78988/6166/54460/6194/440275/1654/29088/28973/6230/4736/54148/6135/51253/6191/57129/23/65008/6202/220717/6129/29074/689/6229/6206/6207/64949/6222/6189/6164/6175/6218/6133/6227/6155/6122/6144/6154	54
CC	GO:0016514	SWI/SNF complex	9/2374	19/19559	0.000165711	0.00162306	0.00119952	8289/6599/6595/6760/57492/6601/6598/5925/86	9
CC	GO:1902911	protein kinase complex	26/2374	104/19559	0.000224958	0.00217358	0.00160639	1021/54619/5111/10983/9779/2967/900/51341/23085/904/890/140775/5925/1164/3643/5565/8621/894/905/5576/9821/983/9133/891/4217/8900	26
CC	GO:0008023	transcription elongation factor complex	17/2374	56/19559	0.000233643	0.00220755	0.00163149	123169/11198/55840/4299/23379/23168/904/27125/25920/5925/4796/8621/905/55209/6749/8458/9646	17
CC	GO:0072686	mitotic spindle	31/2374	133/19559	0.000234649	0.00220755	0.00163149	55920/9126/8243/5311/9657/3832/22919/9585/8317/3192/8556/2648/22974/1729/9611/221150/79718/51203/259266/126731/55689/23122/29127/10735/146909/1062/3833/983/7029/9055/10615	31
CC	GO:0005925	focal adhesion	75/2374	415/19559	0.000253081	0.00235004	0.0017368	10971/7532/117143/5786/811/10146/79026/2665/26986/22919/7531/6125/4478/6641/7529/51495/22823/3313/3676/3159/387/4627/81/847/8394/7184/1499/4736/6191/10097/71/950/3190/5898/23032/8994/6202/6129/2923/23122/51164/382/8936/9656/3728/3655/4869/6207/6868/5576/10672/867/28964/5754/3312/3309/6222/6189/6175/10982/64759/10890/10525/6218/3339/3717/6133/214/6155/6122/2022/83543/301/9124/7739	75
CC	GO:0043601	nuclear replisome	10/2374	24/19559	0.00026528	0.00240095	0.00177442	4172/5422/27339/5557/5814/988/7507/4796/6117/10286	10
CC	GO:0044322	endoplasmic reticulum quality control compartment	10/2374	24/19559	0.00026528	0.00240095	0.00177442	821/56886/811/11236/9695/27248/80267/6400/84447/6048	10
CC	GO:0005721	pericentric heterochromatin	9/2374	20/19559	0.000268914	0.00240342	0.00177625	9031/23468/3070/3619/1060/546/23310/10320/1786	9
CC	GO:0030055	cell-substrate junction	76/2374	423/19559	0.000277804	0.00245222	0.00181231	10971/7532/117143/5786/811/10146/79026/2665/26986/22919/7531/6125/4478/6641/7529/51495/22823/3313/3676/3159/387/4627/81/847/8394/7184/1499/4736/6191/10097/71/950/3190/5898/23032/8994/6202/6129/2923/23122/51164/382/8936/9656/3728/3655/4869/6207/6868/5576/10672/867/28964/5754/3312/3309/6222/6189/6175/10982/64759/10890/10525/6218/3339/3717/6133/55914/214/6155/6122/2022/83543/301/9124/7739	76
CC	GO:0022627	cytosolic small ribosomal subunit	15/2374	47/19559	0.000292883	0.0025538	0.00188739	54505/113251/83939/6194/1654/6230/6191/6202/6229/6206/6207/6222/6189/6218/6227	15
CC	GO:0015030	Cajal body	21/2374	78/19559	0.00029742	0.00256211	0.00189353	9221/1736/96764/51602/23379/7514/11339/8161/677776/3181/55341/6631/677679/79618/677681/50628/23524/677820/54433/10208/677763	21
CC	GO:0005689	U12-type spliceosomal complex	11/2374	29/19559	0.000350813	0.00298608	0.00220687	10081/1665/10262/6628/4904/6635/51639/85437/84844/23451/6633	11
CC	GO:0016591	RNA polymerase II, holoenzyme	21/2374	79/19559	0.0003594	0.00302319	0.00223429	23248/8295/123169/6882/6908/7157/2967/83860/6880/6873/23168/51616/5430/5431/6872/2648/5440/6875/55209/6879/9646	21
CC	GO:0015935	small ribosomal subunit	20/2374	74/19559	0.000388382	0.00322899	0.00238639	55173/54505/113251/60488/83939/54460/6194/1654/28973/6230/6191/6202/6229/6206/6207/64949/6222/6189/6218/6227	20
CC	GO:0101031	chaperone complex	10/2374	25/19559	0.000394281	0.00324035	0.00239478	10694/10575/10576/908/3326/10574/10728/7203/8624/3312	10
CC	GO:0071005	U2-type precatalytic spliceosome	15/2374	50/19559	0.000616264	0.00500715	0.00370053	24148/10946/10262/10594/11193/27258/6628/57703/6635/57819/23524/84844/23020/23451/6633	15
CC	GO:1902554	serine/threonine protein kinase complex	22/2374	89/19559	0.000780084	0.00626696	0.0046316	1021/54619/5111/10983/9779/2967/900/51341/23085/904/890/140775/5925/1164/8621/894/905/9821/983/9133/891/8900	22
CC	GO:0005832	chaperonin-containing T-complex	6/2374	11/19559	0.00085165	0.0065548	0.00484433	10694/10575/10576/908/10574/7203	6
CC	GO:0031010	ISWI-type complex	6/2374	11/19559	0.00085165	0.0065548	0.00484433	54107/8467/2186/10042/5928/54108	6
CC	GO:0005766	primary lysosome	33/2374	155/19559	0.000852582	0.0065548	0.00484433	47/8673/1650/203068/10694/6836/2665/10576/400668/6845/23197/8804/401258/79980/84061/10097/55754/387263/387921/23317/10383/5036/4353/5707/10493/1778/6036/566/5657/51816/1511/6037/1991	33
CC	GO:0042582	azurophil granule	33/2374	155/19559	0.000852582	0.0065548	0.00484433	47/8673/1650/203068/10694/6836/2665/10576/400668/6845/23197/8804/401258/79980/84061/10097/55754/387263/387921/23317/10383/5036/4353/5707/10493/1778/6036/566/5657/51816/1511/6037/1991	33
CC	GO:0005685	U1 snRNP	12/2374	37/19559	0.000990177	0.0075054	0.00554687	51747/101954264/101954272/6628/55660/101954277/55015/6631/6635/6626/6633/101954267	12
CC	GO:0031519	PcG protein complex	14/2374	47/19559	0.00100236	0.0075054	0.00554687	3720/1457/7528/2146/22823/23512/55252/10389/23411/648/5928/6015/84733/171023	14
CC	GO:0000791	euchromatin	13/2374	42/19559	0.00101207	0.0075054	0.00554687	6908/23076/27316/8805/29128/23411/1499/6667/10155/84733/55209/1791/3725	13
CC	GO:0005662	DNA replication factor A complex	7/2374	15/19559	0.00101821	0.0075054	0.00554687	27339/5814/988/7507/4796/6117/10286	7
CC	GO:0070461	SAGA-type complex	10/2374	28/19559	0.00112365	0.00819802	0.00605875	8295/3054/117143/23326/6880/6873/9913/51616/2648/6879	10
CC	GO:0030176	integral component of endoplasmic reticulum membrane	33/2374	158/19559	0.00120259	0.0086854	0.00641895	821/29927/1388/5311/9697/811/23471/51604/51495/9695/201562/113419/93380/347734/23204/401494/84912/340061/23344/128869/6721/23065/6892/84447/2923/51669/51000/3309/3290/11001/3122/3123/3127	33
CC	GO:0046540	U4/U6 x U5 tri-snRNP complex	13/2374	43/19559	0.00129151	0.0092343	0.00682461	24148/26830/10594/27258/6628/26828/6635/57819/26831/23020/10465/26829/6633	13
CC	GO:0031227	intrinsic component of endoplasmic reticulum membrane	34/2374	166/19559	0.00145463	0.0102976	0.00761046	57488/821/29927/1388/5311/9697/811/23471/51604/51495/9695/201562/113419/93380/347734/23204/401494/84912/340061/23344/128869/6721/23065/6892/84447/2923/51669/51000/3309/3290/11001/3122/3123/3127	34
CC	GO:0045120	pronucleus	7/2374	16/19559	0.00162144	0.0112222	0.00829379	6908/10270/55183/200424/2146/890/1063	7
CC	GO:0097526	spliceosomal tri-snRNP complex	13/2374	44/19559	0.00163222	0.0112222	0.00829379	24148/26830/10594/27258/6628/26828/6635/57819/26831/23020/10465/26829/6633	13
CC	GO:0005669	transcription factor TFIID complex	11/2374	34/19559	0.00163232	0.0112222	0.00829379	6882/6908/7157/2967/83860/6880/6873/51616/6872/6875/6879	11
CC	GO:0032040	small-subunit processome	12/2374	39/19559	0.0016592	0.0112984	0.00835007	8602/55127/27340/134430/51602/22984/79954/7520/57050/9724/65083/5591	12
CC	GO:0000118	histone deacetylase complex	19/2374	77/19559	0.00176684	0.0119179	0.00880789	8295/10847/1457/23468/1108/81611/3094/51341/79595/23186/9611/5928/57459/79718/91748/8204/58516/51780/55809	19
CC	GO:0005876	spindle microtubule	17/2374	66/19559	0.00183869	0.0122866	0.00908042	3832/22919/3192/3796/9183/8881/9735/143/221150/51203/126731/23122/146909/1062/24137/983/9055	17
CC	GO:0071007	U2-type catalytic step 2 spliceosome	10/2374	30/19559	0.0020488	0.0135638	0.0100244	27339/10594/988/6628/51645/57703/6635/10286/23524/6633	10
CC	GO:1990391	DNA repair complex	12/2374	40/19559	0.00211216	0.013855	0.0102395	4436/5379/23028/2956/5378/7520/4292/23186/7507/2547/64421/5591	12
CC	GO:0005697	telomerase holoenzyme complex	8/2374	21/19559	0.00219273	0.0142528	0.0105335	54552/1736/55226/3192/6628/6635/10728/54433	8
CC	GO:0000778	condensed nuclear chromosome kinetochore	7/2374	17/19559	0.0024697	0.0157664	0.0116522	55320/79980/701/1060/64105/699/891	7
CC	GO:0005852	eukaryotic translation initiation factor 3 complex	7/2374	17/19559	0.0024697	0.0157664	0.0116522	8661/6059/8669/8664/8668/1654/3646	7
CC	GO:0005643	nuclear pore	20/2374	85/19559	0.00249967	0.0158165	0.0116892	64328/10527/55706/23279/3839/348995/9972/23225/2733/11260/55746/3843/53371/23511/9631/5903/23165/55916/23299/23039	20
CC	GO:0008250	oligosaccharyltransferase complex	6/2374	13/19559	0.00254869	0.0158462	0.0117111	6185/1650/201595/58505/84061/6184	6
CC	GO:0016281	eukaryotic translation initiation factor 4F complex	6/2374	13/19559	0.00254869	0.0158462	0.0117111	1982/1974/1975/51633/1981/8672	6
CC	GO:0005874	microtubule	72/2374	431/19559	0.00297069	0.0183107	0.0135325	55920/10564/8661/10059/3799/10128/203068/54617/79848/10694/26586/3832/55835/22919/9585/10575/3192/23172/10576/6760/9793/908/23291/3796/9183/8881/54801/27130/114791/9702/3619/10574/22974/84376/9735/143/10383/9928/221150/51203/259266/126731/23122/7461/7203/29127/1781/146909/6683/115106/4957/56271/3925/1062/1778/221035/56992/10112/9053/24137/11004/10982/4130/3833/983/140609/10253/10783/9055/1759/106…	72
CC	GO:0022625	cytosolic large ribosomal subunit	15/2374	58/19559	0.00319238	0.019509	0.0144181	6125/51187/6166/4736/6135/65008/220717/6129/6164/6175/6133/6155/6122/6144/6154	15
CC	GO:0000780	condensed nuclear chromosome, centromeric region	10/2374	32/19559	0.00350591	0.0212434	0.0157	55320/79980/701/1060/546/151246/5885/64105/699/891	10
CC	GO:0030663	COPI-coated vesicle membrane	7/2374	18/19559	0.00362186	0.0217616	0.0160829	1314/10959/10945/372/1315/26958/51014	7
CC	GO:0017053	transcription repressor complex	18/2374	76/19559	0.0037185	0.0221561	0.0163744	1457/5978/23468/1108/7529/23013/51341/23186/6667/9611/5928/57459/79718/5926/51132/2672/3725/1991	18
CC	GO:0031209	SCAR complex	5/2374	10/19559	0.00389884	0.0225501	0.0166656	10163/55845/3071/10006/8936	5
CC	GO:0031414	N-terminal protein acetyltransferase complex	5/2374	10/19559	0.00389884	0.0225501	0.0166656	60560/80018/80155/79612/51126	5
CC	GO:0070938	contractile ring	5/2374	10/19559	0.00389884	0.0225501	0.0166656	9585/4627/54443/7402/9055	5
CC	GO:0000940	condensed chromosome outer kinetochore	6/2374	14/19559	0.0040054	0.0225501	0.0166656	55746/701/221150/699/1063/891	6
CC	GO:0008278	cohesin complex	6/2374	14/19559	0.0040054	0.0225501	0.0166656	9126/8243/442582/151246/5885/10735	6
CC	GO:0033276	transcription factor TFTC complex	6/2374	14/19559	0.0040054	0.0225501	0.0166656	8295/6880/6873/51616/2648/6879	6
CC	GO:1990023	mitotic spindle midzone	6/2374	14/19559	0.0040054	0.0225501	0.0166656	55920/9585/3192/146909/1062/9055	6
CC	GO:0030137	COPI-coated vesicle	9/2374	28/19559	0.00448276	0.0250404	0.0185061	55704/1314/10959/10945/372/10972/1315/26958/51014	9
CC	GO:0005686	U2 snRNP	8/2374	24/19559	0.00568048	0.0311391	0.0230133	27336/10946/6628/6635/51639/84844/23451/6633	8
CC	GO:1990752	microtubule end	10/2374	34/19559	0.00568319	0.0311391	0.0230133	22919/23172/9793/259266/7461/146909/11004/10982/10253/10615	10
CC	GO:0019867	outer membrane	40/2374	220/19559	0.0057052	0.0311391	0.0230133	57506/1374/56910/9804/9868/10059/139322/55326/10128/10953/599/1386/10989/3313/9830/10651/140707/51001/11331/9187/54832/340061/2475/8165/7419/4976/4170/79073/23111/51703/10493/4925/8936/10280/7416/596/5366/161176/23446/10981	40
CC	GO:0030867	rough endoplasmic reticulum membrane	9/2374	29/19559	0.00581133	0.031478	0.0232638	29927/6734/6726/55219/51430/23204/7317/27346/6155	9
CC	GO:0005671	Ada2/Gcn5/Ada3 transcription activator complex	6/2374	15/19559	0.00599685	0.0319981	0.0236482	54107/3054/11091/26009/2648/55689	6
CC	GO:0071565	nBAF complex	6/2374	15/19559	0.00599685	0.0319981	0.0236482	8289/6599/6595/57492/6601/6598	6
CC	GO:0005793	endoplasmic reticulum-Golgi intermediate compartment	26/2374	130/19559	0.00682776	0.0361618	0.0267254	8729/56886/203547/6836/811/3998/90411/10959/10945/23392/10972/340061/9321/1315/26958/6892/2804/51014/4925/3309/9780/8842/10130/4121/399687/23405	26
CC	GO:1902562	H4 histone acetyltransferase complex	12/2374	46/19559	0.0073871	0.0388366	0.0287022	54107/8295/3054/11091/26009/8089/55167/9643/2648/55683/55689/86	12
CC	GO:0031968	organelle outer membrane	39/2374	218/19559	0.00823128	0.0429589	0.0317488	57506/1374/56910/9804/9868/10059/139322/55326/10128/10953/599/1386/10989/3313/9830/10651/140707/51001/11331/54832/340061/2475/8165/7419/4976/4170/79073/23111/51703/10493/4925/8936/10280/7416/596/5366/161176/23446/10981	39
CC	GO:0035098	ESC/E(Z) complex	6/2374	16/19559	0.0086221	0.0444445	0.0328467	3720/2146/22823/23512/23411/5928	6
CC	GO:0042571	immunoglobulin complex, circulating	17/2374	76/19559	0.00864026	0.0444445	0.0328467	3543/3493/28388/28394/28467/28442/3501/28392/3512/28448/28468/3503/28408/28444/28450/28423/3502	17
CC	GO:0034451	centriolar satellite	20/2374	95/19559	0.00934181	0.04771	0.0352601	123811/65109/51441/3799/163786/80184/64770/10464/79682/54801/26524/84376/10806/5108/9847/11051/55165/10783/197358/10615	20
CC	GO:0000930	gamma-tubulin complex	7/2374	21/19559	0.0095413	0.0483717	0.0357491	55835/80184/9793/440145/114791/10210/672	7
CC	GO:0018995	host cellular component	15/2374	65/19559	0.00985939	0.0483717	0.0357491	7155/55706/23279/348995/9972/23225/3998/55746/53371/23511/9631/7514/5903/23165/7153	15
CC	GO:0043657	host cell	15/2374	65/19559	0.00985939	0.0483717	0.0357491	7155/55706/23279/348995/9972/23225/3998/55746/53371/23511/9631/7514/5903/23165/7153	15
CC	GO:0030914	STAGA complex	5/2374	12/19559	0.00994496	0.0483717	0.0357491	8295/117143/6880/9913/2648	5
CC	GO:0032300	mismatch repair complex	5/2374	12/19559	0.00994496	0.0483717	0.0357491	4436/5379/2956/5378/4292	5
CC	GO:0034709	methylosome	5/2374	12/19559	0.00994496	0.0483717	0.0357491	2079/1207/6628/6635/6633	5
CC	GO:0048188	Set1C/COMPASS complex	5/2374	12/19559	0.00994496	0.0483717	0.0357491	3054/9739/11091/80335/23067	5
MF	GO:0042393	histone binding	88/2241	238/18352	5.05768e-23	5.4016e-20	4.52529e-20	10927/10527/55193/6599/9031/8028/10847/29028/55023/23613/11091/54617/10541/23468/55206/9682/23522/2956/7913/54799/22955/7259/6418/114803/6595/11137/8805/10771/139886/4297/23270/8089/22823/81611/55274/29128/25842/4171/55705/9918/8019/23512/8467/2186/165918/84656/10389/55170/23411/58508/6601/6872/1104/8085/23774/54737/84295/10600/546/23310/5757/1164/55904/115426/221656/4796/23170/5928/7862/9678/544…	88
MF	GO:0008094	DNA-dependent ATPase activity	51/2241	108/18352	2.74941e-19	1.46819e-16	1.23e-16	55193/9557/7155/56916/1660/4172/4436/80205/54617/7486/4361/2956/10146/9044/23132/7516/5884/10111/5983/6595/1108/4173/56897/4171/8467/6596/2186/4175/79075/10721/5985/7520/440081/83990/1654/84515/1763/7153/2547/546/4176/5928/8438/51659/56652/8458/4174/4683/84181/9401/301	51
MF	GO:0004386	helicase activity	61/2241	160/18352	4.06682e-17	1.44779e-14	1.21291e-14	9557/9188/10847/56916/1660/4172/56919/79009/80205/54617/7486/4361/54505/10146/9044/23132/1653/10111/5983/6595/1108/1665/4173/56897/4171/9931/10521/8467/6596/4175/79075/10721/1974/5985/7520/440081/83990/1654/3070/84515/23517/1655/1763/2547/546/4176/8886/8438/55760/51659/56652/23020/8458/91607/4174/1656/4683/23405/84181/9401/301	61
MF	GO:0016887	ATPase activity	114/2241	423/18352	7.44805e-17	1.98863e-14	1.66601e-14	55193/506/79915/9557/7155/9188/10847/56916/1660/29028/4172/56919/3799/79009/6059/4436/80205/22/4363/54617/5379/7486/10694/4361/54505/2956/10146/9044/23132/3832/7516/1653/5884/10111/9585/5983/6595/1108/1665/5378/4173/9550/23456/56897/3313/4171/3796/9931/10521/8467/6596/84896/4627/2186/4175/79075/10721/1974/63979/5985/7520/440081/83990/488/4292/3416/1654/3070/84515/23517/6782/1655/1763/509/7153/254…	114
MF	GO:0003712	transcription coregulator activity	127/2241	498/18352	1.47527e-16	3.15117e-14	2.63995e-14	8289/328/6599/92140/2033/8295/3054/10432/55749/10847/6882/117143/6659/9967/10766/1660/23076/23613/9994/64216/24148/23326/5469/23028/23522/5994/9044/25/8861/2146/1653/8725/6666/55835/23741/114803/6595/8805/9792/10771/3192/64324/23082/6880/6760/57492/54880/11244/9774/7337/8031/23013/55274/166968/10915/3159/9913/10521/4664/10370/57178/81/23411/1789/51616/9969/58508/6427/8804/6601/9968/4005/865/8202/…	127
MF	GO:0043021	ribonucleoprotein complex binding	52/2241	133/18352	2.48346e-15	4.42055e-13	3.7034e-13	23367/11052/6185/9221/6731/54915/29927/6734/1660/56919/60558/6059/6726/24148/23468/1938/54505/2146/26046/80155/3192/4528/9793/83939/85451/10985/7374/25929/9728/1975/127933/51068/1654/6628/57510/1655/708/84295/2475/26284/79612/253943/6631/55364/50628/27044/51119/4869/10465/6626/3309/8225	52
MF	GO:0003713	transcription coactivator activity	80/2241	267/18352	6.34784e-15	9.68499e-13	8.11378e-13	8289/328/6599/92140/2033/3054/10432/55749/10847/6882/117143/6659/9967/1660/23076/24148/23326/5469/23028/5994/25/6666/55835/114803/6595/8805/9792/23082/6880/6760/57492/7337/8031/10915/3159/9913/10521/10370/57178/81/23411/9969/58508/6601/9968/4005/865/8202/1499/8085/2648/9412/9321/6598/10600/1859/55534/10153/10155/7110/9439/8204/672/408/10463/86/3728/4869/135112/55809/171023/5579/10499/329/4261/105…	80
MF	GO:0140097	catalytic activity, acting on DNA	68/2241	209/18352	7.90176e-15	1.05489e-12	8.8375e-13	54107/328/55193/5429/9557/7155/56916/1660/5111/4172/11232/1736/80205/54617/7486/4361/10146/23132/1653/5422/10111/5983/7150/1108/4173/56897/4171/3159/7374/2237/4175/79075/10721/1789/5985/5427/7520/440081/83990/1654/84515/5980/348654/1763/22909/7153/2547/546/64421/4176/10728/54108/51455/8438/51659/56652/201973/55247/92667/1786/4174/4683/23405/84181/5426/9401/1791/301	68
MF	GO:0003678	DNA helicase activity	36/2241	78/18352	1.20657e-13	1.4318e-11	1.19952e-11	9557/56916/1660/4172/80205/54617/7486/4361/10146/23132/10111/5983/1108/4173/56897/4171/4175/79075/10721/5985/7520/440081/83990/1654/84515/1763/2547/546/4176/51659/56652/4174/4683/84181/9401/301	36
MF	GO:0003697	single-stranded DNA binding	43/2241	114/18352	2.66843e-12	2.84988e-10	2.38754e-10	10623/1660/4172/4436/10128/7247/10592/5893/5422/10111/7555/51729/7150/3192/4173/8939/8880/4171/64710/23168/56852/4175/5814/10635/4292/84515/51444/4904/3181/4176/675/6117/8318/3178/56652/55247/55388/4174/79991/3329/25939/301/3512	43
MF	GO:0140297	DNA-binding transcription factor binding	87/2241	347/18352	2.51907e-11	2.44579e-09	2.049e-09	8289/328/9324/92140/2033/3054/6882/9967/10766/6908/5111/56919/55787/9730/23613/24148/2322/5469/5933/23028/23468/10270/811/9113/6938/8861/1108/8805/64324/6880/1386/860/166968/10915/3159/81/142/11331/4609/7159/23411/9969/468/7533/9968/51341/4005/3301/8202/6872/6049/1499/1655/6801/6598/5925/6667/5757/9611/2551/4209/6875/7110/8204/408/3728/6879/4869/54892/135112/3727/51053/55809/9039/596/3087/171023/…	87
MF	GO:0035257	nuclear hormone receptor binding	45/2241	144/18352	1.17716e-09	1.04767e-07	8.77704e-08	8289/9324/2033/6882/9967/10766/5111/9730/24148/2322/5469/23028/811/9113/8805/64324/3159/81/142/11331/23411/9969/7533/9968/51341/8202/6872/6049/1499/1655/6801/9611/7110/8204/408/3728/6879/135112/3727/55809/9039/171023/5579/10499/4929	45
MF	GO:0140030	modification-dependent protein binding	45/2241	153/18352	9.78973e-09	8.04264e-07	6.73787e-07	10927/55193/55023/23613/11091/23468/9682/2956/2060/54799/11137/8805/10771/139886/23172/79184/4297/8089/22823/29128/56852/8019/23512/2186/165918/10594/84656/3416/22890/6872/22909/54737/56893/546/23310/55904/29978/23170/54454/84733/23118/55689/6879/54892/3329	45
MF	GO:0061629	RNA polymerase II-specific DNA-binding transcription factor binding	66/2241	267/18352	1.15227e-08	8.79014e-07	7.3641e-07	8289/328/9324/92140/2033/6882/9967/10766/6908/5111/9730/24148/2322/5469/5933/23028/10270/811/9113/8861/1108/8805/64324/1386/166968/10915/3159/81/142/11331/7159/23411/9969/7533/9968/51341/4005/3301/8202/6872/6049/1499/1655/6801/6598/5925/6667/9611/6875/7110/8204/408/3728/6879/4869/135112/3727/55809/9039/171023/5579/10499/6722/2353/4929/3725	66
MF	GO:0045296	cadherin binding	76/2241	332/18352	3.31174e-08	2.35796e-06	1.97542e-06	23367/57488/5781/3054/1968/10163/8615/2802/3799/55854/5062/1938/10694/4361/54505/10606/2060/1399/79026/1982/22919/7531/28969/7529/9793/83939/10985/9685/4627/5917/11273/3326/23085/55379/1654/23607/1499/4735/55833/57650/7112/26135/3190/6624/3646/11329/5586/26156/1500/9748/2194/392/27044/10006/55082/3728/1983/3655/54443/867/3312/3309/2023/8842/6164/1656/5214/10890/5052/829/9133/3417/6711/301/9124/89…	76
MF	GO:0140098	catalytic activity, acting on RNA	84/2241	390/18352	1.15256e-07	7.65187e-06	6.4105e-06	328/9188/115752/10623/1660/10056/1615/79979/27292/56919/55157/79009/255967/57472/64216/7247/96764/54505/2058/25885/10146/55699/221830/4677/1653/3376/6894/1665/23404/84172/87178/54482/201626/2193/2237/10521/5557/5073/5917/51692/1974/158234/54901/221078/10785/51520/127253/79731/5430/440081/55006/83990/5431/57038/22803/1654/23517/28987/1655/92935/9412/54931/23357/51067/5440/661/8886/5859/25819/55760…	84
MF	GO:0045182	translation regulator activity	40/2241	139/18352	1.22557e-07	7.65187e-06	6.4105e-06	23367/8661/1968/8562/29904/1979/1967/8894/9669/10658/1938/8669/54505/26986/1982/1933/7555/3658/4528/1964/83939/10985/8664/1974/8668/1975/440275/1981/7284/7298/708/2475/8672/23/10644/3646/1983/16/158078/1978	40
MF	GO:0003725	double-stranded RNA binding	27/2241	76/18352	1.28964e-07	7.65187e-06	6.4105e-06	3608/92140/9188/1660/56919/51663/1653/1665/4478/3192/79693/1975/26065/8575/4154/149041/3326/1654/26523/3609/10383/54542/192670/103/7037/3329/23405	27
MF	GO:0051427	hormone receptor binding	47/2241	177/18352	1.49925e-07	8.42735e-06	7.06017e-06	8289/9324/2033/5781/6882/9967/10766/5111/9730/24148/2322/5469/23028/811/9113/8805/64324/3159/81/142/11331/23411/9969/7533/9968/51341/8202/6872/6049/1499/1655/6801/9611/7110/8204/408/3728/6879/135112/3727/55809/9039/171023/5579/10499/3717/4929	47
MF	GO:0003688	DNA replication origin binding	13/2241	23/18352	4.51576e-07	2.41142e-05	2.02021e-05	1660/4172/5422/4173/4171/4175/84515/4998/4176/8318/55388/4174/3329	13
MF	GO:0016922	nuclear receptor binding	31/2241	101/18352	6.72286e-07	3.41905e-05	2.86437e-05	8289/2033/5111/9730/24148/2322/5469/23028/811/9113/8805/64324/3159/142/11331/7533/51341/8202/6049/1499/1655/6801/7110/8204/408/3727/55809/9039/5579/10499/4929	31
MF	GO:0140142	nucleocytoplasmic carrier activity	15/2241	31/18352	8.41551e-07	4.08535e-05	3.42258e-05	64328/23633/1434/3839/26953/3843/7514/55705/3841/3838/57510/23534/30000/3842/23039	15
MF	GO:0003743	translation initiation factor activity	20/2241	51/18352	8.89175e-07	4.12886e-05	3.45903e-05	8661/1968/8562/1967/8894/9669/8669/54505/1982/4528/1964/83939/8664/1974/8668/1975/1981/8672/3646/1983	20
MF	GO:0035064	methylated histone binding	24/2241	69/18352	9.91491e-07	4.23565e-05	3.54849e-05	10927/23613/11091/23468/9682/2956/54799/11137/10771/139886/22823/29128/23512/2186/84656/6872/54737/546/23310/55904/23170/84733/6879/54892	24
MF	GO:0140034	methylation-dependent protein binding	24/2241	69/18352	9.91491e-07	4.23565e-05	3.54849e-05	10927/23613/11091/23468/9682/2956/54799/11137/10771/139886/22823/29128/23512/2186/84656/6872/54737/546/23310/55904/23170/84733/6879/54892	24
MF	GO:0003684	damaged DNA binding	23/2241	65/18352	1.1759e-06	4.49635e-05	3.7669e-05	328/2033/5429/5111/4436/7486/2956/7374/56852/2237/10721/7520/7507/163859/2547/64421/51455/6117/3014/672/55247/4683/9401	23
MF	GO:0034212	peptide N-acetyltransferase activity	23/2241	65/18352	1.1759e-06	4.49635e-05	3.7669e-05	2033/10847/9329/8473/11091/80018/23326/23522/80155/6880/1386/9913/8202/6872/23774/79829/2648/55683/79612/675/51126/7862/9678	23
MF	GO:0008022	protein C-terminus binding	47/2241	189/18352	1.17882e-06	4.49635e-05	3.7669e-05	10971/2033/7155/51028/57120/3839/5111/4436/23215/57466/4361/11073/25/26986/22919/7529/4691/8089/11331/23411/468/7520/5430/9968/8161/4288/23607/1499/7153/2547/6721/6667/675/9662/84687/10935/9656/481/85358/1063/5190/3339/4261/3717/50944/1759/991	47
MF	GO:0017116	single-stranded DNA helicase activity	11/2241	18/18352	1.22874e-06	4.52515e-05	3.79103e-05	1660/5983/56897/4171/4175/79075/10721/5985/1763/4176/4174	11
MF	GO:0008135	translation factor activity, RNA binding	27/2241	84/18352	1.27452e-06	4.5373e-05	3.80121e-05	8661/1968/8562/29904/1967/8894/9669/1938/8669/54505/1982/1933/4528/1964/83939/10985/8664/1974/8668/1975/1981/7284/8672/23/3646/1983/158078	27
MF	GO:0090079	translation regulator activity, nucleic acid binding	32/2241	109/18352	1.33999e-06	4.61649e-05	3.86755e-05	23367/8661/1968/8562/29904/1967/8894/9669/10658/1938/8669/54505/26986/1982/1933/4528/1964/83939/10985/8664/1974/8668/1975/1981/7284/7298/708/8672/23/3646/1983/158078	32
MF	GO:0018024	histone-lysine N-methyltransferase activity	18/2241	44/18352	1.50222e-06	5.01367e-05	4.20029e-05	83852/79723/55870/9739/11091/2146/29072/64324/4297/80335/23512/23067/58508/8085/7468/55209/84444/7552	18
MF	GO:0030374	nuclear receptor transcription coactivator activity	20/2241	54/18352	2.56112e-06	8.28873e-05	6.94404e-05	10432/55749/9967/23326/5469/23028/23082/6760/3159/57178/81/9969/9968/8202/7110/10463/135112/55809/5579/10499	20
MF	GO:0042826	histone deacetylase binding	32/2241	115/18352	4.77257e-06	0.000149915	0.000125594	54887/7155/23468/10270/7157/6421/7531/1108/7529/54880/166968/142/1789/3838/3326/7153/2648/84295/6667/9611/4209/5928/5586/8204/3320/56271/11051/51053/6722/4208/3206/991	32
MF	GO:0031491	nucleosome binding	23/2241	70/18352	5.04364e-06	0.000153903	0.000128935	8289/6599/9324/8028/11198/1108/57492/10473/29128/50809/8467/165918/84656/6601/1104/6598/5928/57459/86/6749/3150/7443/8971	23
MF	GO:0016407	acetyltransferase activity	30/2241	105/18352	5.22467e-06	0.000154999	0.000129853	2033/10847/9329/8473/11091/80018/23326/3030/23522/55226/80155/8443/6880/1386/1737/64921/9913/8202/6872/23774/79829/2648/55683/79612/675/51126/7862/9678/2194/138050	30
MF	GO:0003727	single-stranded RNA binding	27/2241	90/18352	5.59928e-06	0.000161623	0.000135402	10657/10492/1660/113251/51663/26986/27316/1653/7555/3185/3192/87178/1975/26065/7072/5725/1654/3187/26523/3609/6631/9987/3178/192670/6741/5939/301	27
MF	GO:0031490	chromatin DNA binding	30/2241	106/18352	6.44499e-06	0.000181138	0.000151752	54107/328/6599/9324/2033/10664/1660/5469/55206/2146/1108/3192/10473/23512/81/6601/1104/29803/6598/5928/23592/57459/7543/86/51780/3150/6722/4851/9760/8971	30
MF	GO:0019787	ubiquitin-like protein transferase activity	88/2241	457/18352	8.26727e-06	0.000226396	0.000189667	92912/55159/80829/23609/8065/55148/57534/6502/26259/54765/5469/57542/55120/23376/11236/152006/26046/7324/4799/8805/7267/27339/54880/8697/7337/7327/27252/57448/8454/51592/29128/23291/56852/9830/6596/151525/54467/55167/51465/165918/55958/57691/23077/27246/9968/149041/9781/5903/223082/51444/6872/6049/25831/54941/10210/9412/51514/10475/9690/57630/9354/5930/387921/115426/10075/7428/81844/54542/79102/1…	88
MF	GO:0051082	unfolded protein binding	32/2241	118/18352	8.60678e-06	0.000229801	0.00019252	821/9804/56886/10694/811/3998/10575/10576/3313/908/27248/10036/3301/7184/3326/10772/6782/10574/23195/10383/10728/6892/84447/7203/5202/4869/3320/3312/3309/5203/3329/6102	32
MF	GO:0004812	aminoacyl-tRNA ligase activity	16/2241	41/18352	1.17924e-05	0.000289978	0.000242934	10056/1615/55157/2058/55699/4677/3376/2193/5917/51520/79731/57038/92935/51067/5859/16	16
MF	GO:0016875	ligase activity, forming carbon-oxygen bonds	16/2241	41/18352	1.17924e-05	0.000289978	0.000242934	10056/1615/55157/2058/55699/4677/3376/2193/5917/51520/79731/57038/92935/51067/5859/16	16
MF	GO:0004842	ubiquitin-protein transferase activity	84/2241	435/18352	1.17972e-05	0.000289978	0.000242934	92912/55159/80829/23609/8065/55148/57534/6502/26259/54765/5469/57542/55120/11236/152006/26046/7324/4799/8805/7267/27339/54880/8697/7337/7327/27252/57448/8454/51592/29128/23291/56852/9830/6596/151525/54467/55167/51465/165918/55958/23077/27246/9968/149041/9781/223082/51444/6872/6049/25831/54941/10210/9412/51514/10475/9690/57630/9354/5930/387921/115426/10075/7428/81844/54542/79102/10155/6015/9867/29…	84
MF	GO:0003887	DNA-directed DNA polymerase activity	12/2241	25/18352	1.19466e-05	0.000289978	0.000242934	54107/5429/11232/5422/10721/5427/5980/54108/51455/201973/5426/1791	12
MF	GO:0008080	N-acetyltransferase activity	25/2241	84/18352	1.43369e-05	0.000333182	0.000279129	2033/10847/9329/8473/11091/80018/23326/23522/55226/80155/6880/1386/9913/8202/6872/23774/79829/2648/55683/79612/675/51126/7862/9678/138050	25
MF	GO:0070063	RNA polymerase binding	24/2241	79/18352	1.44166e-05	0.000333182	0.000279129	23248/9221/23160/123169/22828/1660/57466/10541/8725/3192/284695/54700/10915/23168/8202/904/57661/26523/5586/672/905/9646/4734/653390	24
MF	GO:0004402	histone acetyltransferase activity	19/2241	55/18352	1.46625e-05	0.000333182	0.000279129	2033/10847/9329/8473/11091/23326/23522/6880/1386/9913/8202/6872/23774/79829/2648/55683/675/7862/9678	19
MF	GO:0033613	activating transcription factor binding	24/2241	80/18352	1.82336e-05	0.000405698	0.000339881	2033/3054/56919/55787/5933/8861/6880/1386/4609/51341/4005/1499/5925/5757/9611/2551/4209/4869/2353/4261/4208/10783/3214/3725	24
MF	GO:0000217	DNA secondary structure binding	14/2241	34/18352	2.01304e-05	0.000438762	0.000367581	4436/7528/7486/2956/7516/25/4297/3159/56852/63967/348654/55247/4208/9401	14
MF	GO:0000049	tRNA binding	21/2241	66/18352	2.23846e-05	0.000478136	0.000400567	1968/55157/55699/11260/55226/3376/83939/2193/79693/9255/5917/158234/221078/8518/440275/57510/54931/51067/91607/6741/16	21
MF	GO:0035258	steroid hormone receptor binding	24/2241	81/18352	2.29408e-05	0.000480407	0.00040247	2033/5111/9730/24148/2322/5469/23028/811/9113/64324/142/11331/7533/51341/6049/1499/1655/6801/7110/8204/408/55809/5579/4929	24
MF	GO:0061733	peptide-lysine-N-acetyltransferase activity	19/2241	57/18352	2.61512e-05	0.000537105	0.00044997	2033/10847/9329/8473/11091/23326/23522/6880/1386/9913/8202/6872/23774/79829/2648/55683/675/7862/9678	19
MF	GO:0016874	ligase activity	39/2241	165/18352	3.23631e-05	0.000652148	0.000546349	506/10056/1615/55157/2058/10606/55699/4677/3376/64087/56922/10054/2193/56474/5917/2618/2937/51520/790/79731/5198/57038/159/92935/509/51067/8803/5859/7317/31/54529/51703/25902/16/9039/7318/11001/116285/6296	39
MF	GO:0008190	eukaryotic initiation factor 4E binding	7/2241	10/18352	3.43879e-05	0.000680117	0.000569781	23367/1979/1981/1654/23357/3087/1978	7
MF	GO:0004527	exonuclease activity	24/2241	83/18352	3.57706e-05	0.0006946	0.000581914	328/115752/255967/57472/7486/4361/1653/10111/23404/87178/201626/2237/5073/51692/10721/81691/22803/22909/64421/23357/25819/56915/92667/5426	24
MF	GO:0061608	nuclear import signal receptor activity	10/2241	20/18352	4.16985e-05	0.00079525	0.000666236	23633/3839/26953/3843/55705/3841/3838/23534/30000/3842	10
MF	GO:0034061	DNA polymerase activity	14/2241	36/18352	4.32986e-05	0.000811278	0.000679664	54107/5429/11232/1736/5422/10721/5427/5980/10728/54108/51455/201973/5426/1791	14
MF	GO:0042054	histone methyltransferase activity	19/2241	59/18352	4.50772e-05	0.000830042	0.000695383	83852/79723/55870/9739/11091/2146/29072/64324/4297/80335/23512/23067/55170/58508/8085/7468/55209/84444/7552	19
MF	GO:0008536	Ran GTPase binding	15/2241	41/18352	5.38036e-05	0.000973936	0.000815933	10527/1434/11260/10048/3843/7514/55705/23077/5903/1104/57510/23534/30000/3842/23039	15
MF	GO:0042800	histone methyltransferase activity (H3-K4 specific)	9/2241	17/18352	5.74581e-05	0.00100599	0.000842784	55870/9739/11091/4297/80335/23067/58508/8085/7552	9
MF	GO:0043024	ribosomal small subunit binding	9/2241	17/18352	5.74581e-05	0.00100599	0.000842784	23367/6059/54505/4528/7374/1975/1654/26284/4869	9
MF	GO:0036002	pre-mRNA binding	20/2241	65/18352	5.96863e-05	0.00102814	0.000861347	6431/2033/7884/10658/101954264/3192/101954272/100151683/10594/6427/5725/1655/101954277/3181/26824/6631/3178/6434/10659/101954267	20
MF	GO:0043022	ribosome binding	18/2241	57/18352	9.46501e-05	0.00160454	0.00134424	6185/6731/54915/29927/60558/1938/80155/83939/10985/25929/708/2475/79612/253943/55364/51119/3309/8225	18
MF	GO:0016779	nucleotidyltransferase activity	32/2241	133/18352	0.000111419	0.00185931	0.00155767	54107/5429/10623/11232/1736/25885/221830/25/5422/84172/87178/79693/5557/55603/10721/8732/5427/5430/5431/5980/9412/5440/10728/661/54108/51455/11044/167153/201973/55907/5426/1791	32
MF	GO:0048027	mRNA 5'-UTR binding	11/2241	26/18352	0.000117016	0.00192266	0.00161074	23367/10492/26354/6125/4691/1654/10644/26156/6207/6189/6154	11
MF	GO:0003714	transcription corepressor activity	42/2241	194/18352	0.000141567	0.00229081	0.00191917	328/55749/10766/23613/9994/5469/2146/8725/23741/10771/3192/64324/54880/11244/23013/166968/10915/10370/23411/1789/51616/6427/8804/23186/708/359948/9611/10155/79718/8994/91748/79733/8204/51132/51053/55809/1822/863/10765/57713/54625/1991	42
MF	GO:0043138	3'-5' DNA helicase activity	9/2241	19/18352	0.000173601	0.00276726	0.00231832	1660/54617/7486/4171/4175/4176/51659/4174/9401	9
MF	GO:0061980	regulatory RNA binding	15/2241	45/18352	0.000181838	0.00282455	0.00236632	9698/9188/23369/6659/1660/23264/87178/149041/4904/3181/26523/3178/192670/143689/23405	15
MF	GO:0008143	poly(A) binding	10/2241	23/18352	0.000182485	0.00282455	0.00236632	10657/10492/113251/26986/1653/3192/7072/1654/9987/5939	10
MF	GO:0042162	telomeric DNA binding	13/2241	36/18352	0.000195939	0.00298947	0.00250449	328/26019/7486/10111/4691/23049/7520/3181/2547/6117/79618/3178/79991	13
MF	GO:0019207	kinase regulator activity	45/2241	216/18352	0.000212389	0.00319481	0.00267651	7532/54619/11215/10983/25998/5062/30837/54465/10985/9655/122809/900/57551/3326/92597/1654/904/836/3619/890/3071/22974/140775/51347/1164/5859/389119/894/55364/146850/905/10006/65125/57679/57498/4869/5576/8567/2950/10253/9133/891/28984/5295/8900	45
MF	GO:0030515	snoRNA binding	12/2241	32/18352	0.000228079	0.00338318	0.00283432	9221/9188/8602/1736/55127/51602/9790/55720/7520/705/54433/5591	12
MF	GO:0016279	protein-lysine N-methyltransferase activity	18/2241	61/18352	0.000247814	0.00362555	0.00303738	83852/79723/55870/9739/11091/2146/29072/64324/4297/80335/23512/23067/58508/8085/7468/55209/84444/7552	18
MF	GO:0016278	lysine N-methyltransferase activity	18/2241	62/18352	0.000309809	0.0044713	0.00374592	83852/79723/55870/9739/11091/2146/29072/64324/4297/80335/23512/23067/58508/8085/7468/55209/84444/7552	18
MF	GO:0035198	miRNA binding	12/2241	33/18352	0.000318866	0.00454065	0.00380401	9698/9188/23369/6659/23264/87178/149041/4904/3181/26523/3178/192670	12
MF	GO:0070717	poly-purine tract binding	11/2241	29/18352	0.000369687	0.00519507	0.00435227	10657/10492/113251/26986/1653/3192/87178/7072/1654/9987/5939	11
MF	GO:0016410	N-acyltransferase activity	26/2241	107/18352	0.000399313	0.00553852	0.00464	2033/10847/253782/9329/8473/11091/80018/23326/23522/55226/80155/6880/1386/9913/8202/6872/23774/79829/2648/55683/79612/675/51126/7862/9678/138050	26
MF	GO:0045309	protein phosphorylated amino acid binding	16/2241	53/18352	0.000405698	0.00555495	0.00465376	5781/123169/22828/57466/1399/25/7531/5921/7529/23168/408/6850/867/4734/26228/5295	16
MF	GO:0035173	histone kinase activity	8/2241	17/18352	0.000426964	0.00573192	0.00480202	9031/9730/7443/5579/1111/983/3717/891	8
MF	GO:0051219	phosphoprotein binding	22/2241	85/18352	0.000429357	0.00573192	0.00480202	5781/123169/22828/9967/57466/5311/1399/25/8725/7531/5921/7529/23168/84295/2475/5925/408/6850/867/4734/26228/5295	22
MF	GO:0140296	general transcription initiation factor binding	14/2241	44/18352	0.000509175	0.00671357	0.00562442	6882/55814/6908/51602/7157/3185/3192/6872/2475/54680/55689/196/6879/3087	14
MF	GO:0005048	signal sequence binding	15/2241	49/18352	0.000517172	0.00673585	0.00564308	23633/9221/29927/9804/3839/9972/26953/3843/10945/3841/163/847/3838/30000/3842	15
MF	GO:0044389	ubiquitin-like protein ligase binding	59/2241	316/18352	0.000549494	0.0070706	0.00592352	292/10059/8065/10128/9529/203068/55120/9682/811/7157/7531/6125/10576/8454/3313/6612/5567/56852/6596/8027/11146/51465/23197/7520/5430/3301/3326/9820/5684/26043/6135/55719/340061/71/5925/645432/9530/5898/10155/5036/29089/23111/5707/672/408/3320/10613/5576/8548/596/3312/3309/151636/51701/3329/10783/891/55353/3725	59
MF	GO:0034237	protein kinase A regulatory subunit binding	10/2241	26/18352	0.000599599	0.00762347	0.0063867	10564/10163/11215/64746/10270/5567/8165/10142/9867/8936	10
MF	GO:0070577	lysine-acetylated histone binding	9/2241	22/18352	0.000663598	0.00824096	0.00690402	55193/55023/23613/8805/4297/8089/8019/6872/54454	9
MF	GO:0140033	acetylation-dependent protein binding	9/2241	22/18352	0.000663598	0.00824096	0.00690402	55193/55023/23613/8805/4297/8089/8019/6872/54454	9
MF	GO:0003730	mRNA 3'-UTR binding	27/2241	117/18352	0.000742344	0.00911291	0.00763451	9698/23367/693158/23369/678/26986/7157/6125/3192/406900/25929/407050/9728/8570/5073/7072/10949/149041/1655/3181/26135/3609/10644/26156/10236/11051/5939	27
MF	GO:0008408	3'-5' exonuclease activity	16/2241	56/18352	0.000797271	0.00946739	0.00793148	328/115752/255967/57472/7486/4361/10111/23404/87178/201626/5073/22803/23357/25819/56915/5426	16
MF	GO:0001098	basal transcription machinery binding	19/2241	72/18352	0.000797813	0.00946739	0.00793148	23248/23160/123169/22828/1660/6908/57466/51602/8725/7157/3192/284695/23168/8202/54680/26523/196/6879/9646	19
MF	GO:0001099	basal RNA polymerase II transcription machinery binding	19/2241	72/18352	0.000797813	0.00946739	0.00793148	23248/23160/123169/22828/1660/6908/57466/51602/8725/7157/3192/284695/23168/8202/54680/26523/196/6879/9646	19
MF	GO:0061659	ubiquitin-like protein ligase activity	56/2241	301/18352	0.000817302	0.00959207	0.00803594	55159/23609/55148/6502/54765/5469/55120/23376/11236/152006/26046/4799/8805/27339/7337/29128/23291/56852/9830/6596/54467/55167/57691/23077/27246/9968/149041/9781/223082/51444/6049/54941/10210/9412/10475/9690/57630/9354/5930/387921/115426/10075/54542/79102/6015/84447/54492/6048/51132/54836/867/151636/57820/11237/4734/329	56
MF	GO:0001046	core promoter sequence-specific DNA binding	14/2241	46/18352	0.000839601	0.00974667	0.00816546	6908/5978/2146/7157/54700/4609/6872/6598/26523/7071/5451/4869/2908/2353	14
MF	GO:0008139	nuclear localization sequence binding	10/2241	27/18352	0.000848913	0.0097488	0.00816724	23633/9221/3839/9972/26953/3843/3841/3838/30000/3842	10
MF	GO:0008097	5S rRNA binding	6/2241	11/18352	0.000879811	0.00989093	0.00828631	1938/6125/6135/2971/29074/6122	6
MF	GO:0032404	mismatch repair complex binding	6/2241	11/18352	0.000879811	0.00989093	0.00828631	5111/4436/7486/2956/4292/84515	6
MF	GO:0031369	translation initiation factor binding	11/2241	32/18352	0.000973913	0.0108348	0.00907704	23367/1979/8894/2733/1981/1654/23357/6229/1983/3087/1978	11
MF	GO:0031625	ubiquitin protein ligase binding	55/2241	297/18352	0.00101186	0.0111409	0.00933351	292/10059/8065/10128/9529/203068/55120/9682/811/7157/7531/6125/10576/8454/3313/5567/56852/6596/11146/51465/23197/7520/5430/3301/3326/9820/5684/26043/6135/55719/340061/71/5925/645432/9530/5898/10155/5036/29089/23111/5707/672/408/3320/10613/5576/8548/596/3312/3309/51701/3329/10783/55353/3725	55
MF	GO:0042809	vitamin D receptor binding	7/2241	15/18352	0.00105588	0.0115069	0.00964011	6882/9967/10766/5469/9969/9968/6879	7
MF	GO:0061630	ubiquitin protein ligase activity	54/2241	292/18352	0.00115477	0.0124575	0.0104365	55159/23609/55148/6502/54765/5469/55120/11236/152006/26046/4799/8805/27339/7337/29128/23291/56852/9830/6596/54467/55167/23077/27246/9968/149041/9781/223082/51444/6049/54941/10210/9412/10475/9690/57630/9354/5930/387921/115426/10075/54542/79102/6015/84447/54492/6048/51132/54836/867/151636/57820/11237/4734/329	54
MF	GO:0050681	androgen receptor binding	10/2241	28/18352	0.00117735	0.0125741	0.0105342	2033/24148/23028/811/64324/51341/6049/1655/7110/5579	10
MF	GO:0016796	exonuclease activity, active with either ribo- or deoxyribonucleic acids and producing 5'-phosphomonoesters	16/2241	58/18352	0.00120777	0.0127713	0.0106994	328/115752/255967/57472/23404/87178/201626/2237/5073/22803/64421/23357/25819/56915/92667/5426	16
MF	GO:0019843	rRNA binding	17/2241	64/18352	0.00136306	0.0142721	0.0119567	9188/1938/6125/60493/80135/6135/6191/26284/2971/220717/29074/51119/6207/6222/6175/6133/6122	17
MF	GO:0046975	histone methyltransferase activity (H3-K36 specific)	6/2241	12/18352	0.00157817	0.0162087	0.0135791	55870/29072/64324/7468/55209/7552	6
MF	GO:0070182	DNA polymerase binding	8/2241	20/18352	0.00157837	0.0162087	0.0135791	5111/11232/55226/3326/55215/10728/81620/3320	8
MF	GO:0019887	protein kinase regulator activity	37/2241	185/18352	0.00161172	0.0163935	0.013734	7532/54619/10983/25998/5062/54465/10985/900/57551/3326/1654/904/836/3619/890/3071/22974/140775/51347/1164/5859/389119/894/55364/905/10006/65125/57679/57498/4869/5576/8567/10253/9133/891/28984/8900	37
MF	GO:0008757	S-adenosylmethionine-dependent methyltransferase activity	33/2241	160/18352	0.00165409	0.0166657	0.013962	83852/79723/79979/27292/55870/9739/64216/11091/138199/2146/6894/29072/64324/4297/80335/23512/23067/158234/55170/221078/10785/1789/58508/55006/8085/55251/23463/54931/7468/55209/1786/84444/7552	33
MF	GO:0023026	MHC class II protein complex binding	7/2241	16/18352	0.00168027	0.0167713	0.0140505	7531/3326/3320/481/3312/3122/3123	7
MF	GO:0003724	RNA helicase activity	19/2241	77/18352	0.00189362	0.0187258	0.0156879	9188/1660/56919/79009/54505/10146/1653/1665/10521/1974/440081/83990/1654/23517/1655/8886/55760/23020/1656	19
MF	GO:0002039	p53 binding	17/2241	66/18352	0.00196117	0.0192159	0.0160985	2033/55159/23028/1938/7157/8805/83860/6880/7159/23411/6872/54941/51499/6598/754/55602/3329	17
MF	GO:0046966	thyroid hormone receptor binding	10/2241	30/18352	0.00214377	0.0208141	0.0174374	9324/6882/9967/5469/64324/9969/9968/8202/9611/6879	10
MF	GO:0001882	nucleoside binding	67/2241	389/18352	0.00219698	0.0211385	0.0177092	54552/9221/1968/4893/6734/10059/60558/84273/203068/9669/2746/51552/50808/1938/26354/55207/9790/4733/55720/2776/4528/84172/387/81/2909/25923/8732/26225/401258/3326/5431/377/4735/7284/64225/159/84340/55341/26284/2982/10383/4976/3643/5898/55752/338382/23157/221079/382/1983/2769/10672/5911/8225/10890/100/158078/1612/4261/2983/116285/1759/2770/6102/25939/5874/10981	67
MF	GO:0031492	nucleosomal DNA binding	12/2241	40/18352	0.00222292	0.0211971	0.0177583	6599/9324/1108/10473/6601/1104/6598/5928/57459/86/3150/8971	12
MF	GO:0000400	four-way junction DNA binding	7/2241	17/18352	0.00255759	0.0239004	0.020023	4436/7528/7486/2956/7516/25/348654	7
MF	GO:0010485	H4 histone acetyltransferase activity	7/2241	17/18352	0.00255759	0.0239004	0.020023	8473/11091/23326/79829/2648/55683/675	7
MF	GO:0043175	RNA polymerase core enzyme binding	16/2241	62/18352	0.00257355	0.0239004	0.020023	23248/9221/23160/123169/22828/1660/57466/8725/3192/284695/54700/23168/8202/26523/9646/653390	16
MF	GO:0008276	protein methyltransferase activity	21/2241	91/18352	0.00273658	0.0250189	0.0209601	83852/79723/55870/9739/11091/2146/29072/64324/4297/80335/23512/23067/55170/58508/8085/55251/23463/7468/55209/84444/7552	21
MF	GO:0004518	nuclease activity	40/2241	210/18352	0.00274084	0.0250189	0.0209601	328/115752/255967/55728/57472/7247/7486/4361/10146/1653/10111/23404/87178/201626/2237/5073/51692/10721/116461/81691/22803/28987/348654/1763/22909/64421/23357/25819/57523/27044/56915/91607/85463/92667/126549/23405/5426/25939/6036/6037	40
MF	GO:0015631	tubulin binding	63/2241	365/18352	0.002774	0.0251071	0.0210339	55920/26060/9126/23394/10059/3799/10128/54617/55704/3832/55207/55835/29072/22919/9585/4733/23172/9793/80173/23291/3796/889/55219/57551/1654/114791/9702/84295/22974/84376/675/4976/9928/23170/51203/126731/9857/672/23122/7461/7411/29127/51119/146909/6683/5621/56271/3925/1062/221035/56992/10112/80321/9419/24137/11004/10982/4130/1063/3833/9055/1759/10615	63
MF	GO:0000175	3'-5'-exoribonuclease activity	11/2241	36/18352	0.00285905	0.0256594	0.0214966	115752/255967/57472/23404/87178/201626/5073/22803/23357/25819/56915	11
MF	GO:0033218	amide binding	65/2241	381/18352	0.00319084	0.0283985	0.0237913	23633/9221/23394/29927/9804/3839/64746/3030/9972/10314/811/1200/4012/4820/26953/56922/3843/51752/10945/3841/163/22883/847/11331/2937/3838/3326/3416/23621/51645/7298/79646/81618/3643/30000/6892/554/9360/2194/5530/23398/26027/949/5621/3842/10465/4883/2950/3329/3339/3122/64167/122042/5321/9452/10105/55353/8140/1393/5295/3123/3127/1718/5360/28577	65
MF	GO:1990841	promoter-specific chromatin binding	15/2241	58/18352	0.0033814	0.0297808	0.0249494	23060/1660/5469/5933/23028/2146/7157/3192/1958/23512/5430/1655/648/10155/1786	15
MF	GO:0016746	transferase activity, transferring acyl groups	47/2241	259/18352	0.00340192	0.0297808	0.0249494	2033/1374/47/10847/253782/9329/340481/8473/55326/11091/80018/23326/3030/23522/55226/80155/8443/1431/6880/1386/1737/64921/11101/9913/58508/8202/25921/6872/23774/79829/2648/55683/79612/675/51126/7862/9678/2194/51114/171546/154141/138050/4261/9517/5321/116285/6296	47
MF	GO:0140101	catalytic activity, acting on a tRNA	26/2241	123/18352	0.00343887	0.0298594	0.0250153	10056/1615/79979/55157/2058/55699/4677/3376/6894/54482/2193/5917/158234/54901/221078/10785/51520/127253/79731/55006/57038/92935/54931/51067/5859/16	26
MF	GO:0044183	protein folding chaperone	9/2241	27/18352	0.00354546	0.0305367	0.0255827	811/1676/10576/3313/3326/6782/5202/3312/3309	9
MF	GO:0032549	ribonucleoside binding	65/2241	383/18352	0.00361627	0.0308974	0.0258849	54552/9221/1968/4893/6734/10059/60558/84273/203068/9669/2746/51552/50808/1938/26354/55207/9790/4733/55720/2776/4528/84172/387/2909/25923/8732/26225/401258/3326/5431/377/4735/7284/64225/159/84340/55341/26284/2982/10383/4976/3643/5898/55752/338382/23157/221079/382/1983/2769/10672/5911/8225/10890/158078/1612/4261/2983/116285/1759/2770/6102/25939/5874/10981	65
MF	GO:0042277	peptide binding	54/2241	308/18352	0.00382132	0.0323903	0.0271356	23633/9221/23394/29927/9804/3839/9972/10314/811/1200/4012/4820/26953/3843/51752/10945/3841/163/22883/847/2937/3838/3326/3416/23621/51645/81618/3643/30000/6892/554/9360/5530/23398/949/5621/3842/10465/4883/2950/3329/3339/3122/64167/122042/9452/10105/8140/1393/5295/3123/3127/1718/28577	54
MF	GO:0140223	general transcription initiation factor activity	12/2241	43/18352	0.00431305	0.0362704	0.0303862	6882/6908/2967/83860/6880/6873/54700/51616/6872/6875/6879/653390	12
MF	GO:0016741	transferase activity, transferring one-carbon groups	42/2241	229/18352	0.00445708	0.0371888	0.0311556	83852/79723/79979/27292/4548/55870/9739/64216/11091/96764/138199/2146/6894/29072/64324/4297/54482/80335/23512/23067/2618/158234/55170/221078/10785/1789/790/127253/58508/55006/8085/25840/55251/7298/23463/54931/7468/55209/1786/84444/56978/7552	42
MF	GO:0016896	exoribonuclease activity, producing 5'-phosphomonoesters	11/2241	38/18352	0.00455089	0.0376772	0.0315647	115752/255967/57472/23404/87178/201626/5073/22803/23357/25819/56915	11
MF	GO:0017056	structural constituent of nuclear pore	9/2241	28/18352	0.00466719	0.0383428	0.0321224	65109/55706/23279/9972/55746/53371/23511/9631/23165	9
MF	GO:0000287	magnesium ion binding	40/2241	217/18352	0.00495777	0.0404191	0.0338619	10056/58478/4436/51765/7486/2956/9113/5634/25/5205/3251/23235/10054/283629/5567/2237/2937/63979/348654/159/79895/22909/7153/5631/3418/4976/8803/11329/5911/6197/2023/8986/51701/10783/3417/4217/2770/6102/27306/11213	40
MF	GO:0034062	5'-3' RNA polymerase activity	12/2241	44/18352	0.00528398	0.0420602	0.0352367	10623/25885/221830/84172/5557/5430/5431/9412/5440/661/167153/201973	12
MF	GO:0097747	RNA polymerase activity	12/2241	44/18352	0.00528398	0.0420602	0.0352367	10623/25885/221830/84172/5557/5430/5431/9412/5440/661/167153/201973	12
MF	GO:0001091	RNA polymerase II general transcription initiation factor binding	7/2241	19/18352	0.0053166	0.0420602	0.0352367	6908/51602/7157/3192/54680/196/6879	7
MF	GO:0008409	5'-3' exonuclease activity	7/2241	19/18352	0.0053166	0.0420602	0.0352367	4361/2237/51692/10721/22803/22909/64421	7
MF	GO:0008168	methyltransferase activity	40/2241	218/18352	0.00537379	0.0422001	0.0353539	83852/79723/79979/27292/4548/55870/9739/64216/11091/96764/138199/2146/6894/29072/64324/4297/54482/80335/23512/23067/158234/55170/221078/10785/1789/127253/58508/55006/8085/25840/55251/7298/23463/54931/7468/55209/1786/84444/56978/7552	40
MF	GO:0001883	purine nucleoside binding	64/2241	383/18352	0.0055193	0.0427242	0.035793	54552/9221/1968/4893/6734/10059/60558/84273/203068/9669/2746/51552/50808/1938/26354/55207/9790/4733/55720/2776/4528/387/2909/25923/8732/26225/401258/3326/377/4735/7284/64225/159/84340/55341/26284/2982/10383/4976/3643/5898/55752/338382/23157/221079/382/1983/2769/10672/5911/8225/10890/100/158078/1612/4261/2983/116285/1759/2770/6102/25939/5874/10981	64
MF	GO:0005525	GTP binding	63/2241	376/18352	0.00552055	0.0427242	0.035793	54552/9221/1968/4893/6734/10059/60558/84273/203068/9669/2746/51552/50808/1938/26354/55207/9790/4733/55720/2776/4528/387/2909/25923/8732/26225/401258/3326/377/4735/7284/64225/159/84340/55341/26284/2982/10383/4976/3643/5898/55752/338382/23157/221079/382/1983/2769/10672/5911/8225/10890/158078/1612/4261/2983/116285/1759/2770/6102/25939/5874/10981	63
MF	GO:0004674	protein serine/threonine kinase activity	71/2241	435/18352	0.00640317	0.0491985	0.0412169	1021/8899/29904/1457/9730/54822/51765/5062/9113/9475/83732/7150/8317/23235/283629/124923/204851/5567/23049/23097/10114/57551/26524/26750/127933/440275/5584/701/53944/6872/7867/11183/8491/25778/2475/149420/1859/84930/51347/10733/5565/8621/11329/5597/5586/9748/9833/6850/65125/157/4214/7443/699/6197/29941/7272/5294/8986/51701/5579/1111/5591/6093/983/1612/140609/10783/4217/5613/2022/11213	71
