# Supplementary material for: Novel Prognostic Signature for Acute Myeloid Leukemia: Bioinformatics Analysis of Combined CNV-Driven and Ferroptosis-Related Genes
Source: Front Genet. 2022 Apr 26;13:849437. doi: 10.3389/fgene.2022.849437 (PMC9086455; doi:10.3389/fgene.2022.849437)
Supplement: Supplementary file 14 [file Table13.xlsx]

## Sheet: kegg
Supplementary Table 11. KEGG analysis
ID	Description	GeneRatio	BgRatio	pvalue	p.adjust	qvalue	geneID	Count
hsa04010	MAPK signaling pathway	2021-02-04	294/8105	0.0074959	0.0074959	0.0750702	3315/468	2
hsa05030	Cocaine addiction	2021-01-04	49/8105	0.0239686	0.0239686	0.0750702	468	1
hsa04370	VEGF signaling pathway	2021-01-04	59/8105	0.0288067	0.0288067	0.0750702	3315	1
hsa00590	Arachidonic acid metabolism	2021-01-04	61/8105	0.0297722	0.0297722	0.0750702	247	1
hsa04927	Cortisol synthesis and secretion	2021-01-04	65/8105	0.0317009	0.0317009	0.0750702	468	1
hsa04720	Long-term potentiation	2021-01-04	67/8105	0.0326642	0.0326642	0.0750702	468	1
hsa05031	Amphetamine addiction	2021-01-04	69/8105	0.0336268	0.0336268	0.0750702	468	1
hsa04137	Mitophagy - animal	2021-01-04	72/8105	0.0350693	0.0350693	0.0750702	468	1
hsa03320	PPAR signaling pathway	2021-01-04	75/8105	0.0365102	0.0365102	0.0750702	123	1
hsa04918	Thyroid hormone synthesis	2021-01-04	75/8105	0.0365102	0.0365102	0.0750702	468	1
hsa04911	Insulin secretion	2021-01-04	86/8105	0.0417798	0.0417798	0.0750702	468	1
hsa04211	Longevity regulating pathway	2021-01-04	89/8105	0.0432132	0.0432132	0.0750702	468	1
hsa04912	GnRH signaling pathway	2021-01-04	93/8105	0.0451219	0.0451219	0.0750702	468	1
hsa05215	Prostate cancer	2021-01-04	97/8105	0.0470277	0.0470277	0.0750702	468	1
hsa04925	Aldosterone synthesis and secretion	2021-01-04	98/8105	0.0475037	0.0475037	0.0750702	468	1
hsa05146	Amoebiasis	2021-01-04	102/8105	0.0494059	0.0494059	0.0750702	3315	1
