# Supplementary material for: Novel Prognostic Signature for Acute Myeloid Leukemia: Bioinformatics Analysis of Combined CNV-Driven and Ferroptosis-Related Genes
Source: Front Genet. 2022 Apr 26;13:849437. doi: 10.3389/fgene.2022.849437 (PMC9086455; doi:10.3389/fgene.2022.849437)
Supplement: Supplementary file 15 [file Table7.xlsx]

## Sheet: up_genes_kegg
Supplementary Table 5. Upregulated DEGs in KEGG analysis.
ID	Description	GeneRatio	BgRatio	pvalue	p.adjust	qvalue	geneID	Count
hsa04110	Cell cycle	48/1014	126/8101	1.7081e-13	5.56842e-11	5.08835e-11	1021/10971/2033/7532/9126/5111/4172/8243/6502/5933/25/7157/7531/8317/7529/4173/8697/8454/4171/8881/4175/4609/8556/7533/701/4998/890/5925/4176/5885/1871/894/8318/993/10735/4174/1869/699/7027/7272/1111/5591/983/9133/7029/891/991/8900	48
hsa03040	Spliceosome	48/1014	147/8101	1.08004e-10	1.76046e-08	1.60869e-08	6431/6426/4686/24148/10946/101954264/58517/27316/51729/1665/55119/3192/10262/27339/57187/10915/23350/10594/22916/6432/6427/27258/10772/988/6628/55660/1655/51645/3190/29896/6631/6635/6430/57819/26831/10286/51639/3178/84844/23020/10465/6434/220988/6626/3312/23451/10929/6633	48
hsa03013	Nucleocytoplasmic transport	38/1014	108/8101	8.82028e-10	9.5847e-08	8.75838e-08	5411/64328/10527/23633/1434/65109/26019/55706/4686/23279/3839/348995/9972/23225/2733/11260/55746/3843/53371/23511/6612/9631/57187/7514/55705/3841/22916/3838/5903/51068/57510/23165/23534/30000/55916/10250/3842/23039	38
hsa04141	Protein processing in endoplasmic reticulum	46/1014	171/8101	2.27599e-07	1.85493e-05	1.69501e-05	6185/821/23193/29927/1650/201595/56886/1388/10905/811/23190/23471/3998/10427/7327/8454/9695/27248/51465/468/80267/3301/7184/3326/440275/56893/7841/9601/29978/6184/22872/6400/84447/2923/64215/6048/6747/3320/596/10483/3312/3309/10130/4121/10525/4217	46
hsa03030	DNA replication	17/1014	36/8101	3.32573e-07	2.16837e-05	1.98143e-05	54107/5111/4172/5422/5983/4173/4171/2237/5557/4175/5985/5427/1763/4176/6117/4174/5426	17
hsa04218	Cellular senescence	40/1014	156/8101	5.12786e-06	0.000278613	0.000254594	1021/4893/678/292/54822/5933/4361/7157/10111/293/204851/23291/4609/10114/23411/3708/890/2475/5925/3709/7419/1871/4775/5928/894/993/5530/2305/7416/1869/1111/4605/4683/983/1978/9133/891/4773/5295/8900	40
hsa03018	RNA degradation	24/1014	79/8101	2.05502e-05	0.000957054	0.000874544	55802/115752/10766/255967/57472/9125/118460/26986/23404/87178/3313/9652/5073/27258/22803/23517/57819/84186/11044/56915/2023/1656/5214/3329	24
hsa03450	Non-homologous end-joining	8/1014	13/8101	4.22274e-05	0.00172077	0.00157241	4361/10111/2237/7520/2547/64421/5591/1791	8
hsa00310	Lysine degradation	19/1014	63/8101	0.000163676	0.00511852	0.00467724	83852/79723/55870/9739/3030/2146/29072/64324/4297/23067/3033/58508/8085/55904/219/7468/1892/84444/55526	19
hsa05203	Viral carcinogenesis	44/1014	204/8101	0.000171261	0.00511852	0.00467724	1021/10971/2033/7532/4893/6908/1388/6502/5933/64764/7157/7531/1108/2967/7529/1386/7337/387/5567/81/468/7533/1654/28973/836/890/2648/3190/5925/7419/8294/894/6850/27044/1111/5366/6776/6722/983/8364/991/5295/8900/3725	44
hsa05202	Transcriptional misregulation in cancer	42/1014	192/8101	0.000172711	0.00511852	0.00467724	2120/2322/8861/4299/7157/6760/4297/860/4609/85414/861/4005/2005/904/2078/1655/890/648/6667/9611/894/4353/905/7468/3728/7490/4613/84444/3087/8842/3205/329/4208/1050/64332/3206/4211/1848/5090/8900/1436/1991	42
hsa05166	Human T-cell leukemia virus 1 infection	46/1014	222/8101	0.000324982	0.00882867	0.00806753	2033/8295/821/4893/292/6908/1388/64764/811/7157/293/1386/8697/1958/7514/5567/8881/4609/468/2005/701/890/2648/5925/7419/1871/4775/894/5530/4214/7416/1869/1111/6776/6722/2353/3122/9133/4773/991/5295/8061/3123/3127/8900/3725	46
hsa04120	Ubiquitin mediated proteolysis	32/1014	142/8101	0.000576265	0.014451	0.0132051	92912/8065/6502/26259/55120/7324/27339/8697/10054/7337/7327/57448/8454/23291/8881/51465/55958/9820/9690/9354/10075/7428/7317/672/84447/4214/867/9039/7318/4734/329/991	32
hsa03008	Ribosome biogenesis in eukaryotes	26/1014	109/8101	0.000751714	0.0175042	0.0159951	54552/23160/84128/1457/1736/55127/26354/134430/51602/83732/55226/9790/7514/81691/51068/22803/9724/28987/55341/65083/23195/55916/54433/51119/780852/26851	26
hsa05221	Acute myeloid leukemia	18/1014	67/8101	0.00112203	0.0243855	0.0222832	4893/2322/6654/3815/4609/861/890/2475/4353/3728/6776/1978/6655/1050/5295/1848/8900/1436	18
hsa05161	Hepatitis B	34/1014	162/8101	0.00149223	0.0304043	0.0277831	10971/57506/2033/4893/5111/1388/6654/64764/7157/7529/1386/4609/468/1654/836/890/5925/7419/1871/4775/23118/4214/1869/596/5579/6776/2353/3339/3717/6655/4773/5295/8900/3725	34
hsa00270	Cysteine and methionine metabolism	14/1014	50/8101	0.00254854	0.0488719	0.0446586	4144/58478/4548/10768/6723/6611/2937/1789/262/191/3945/1786/2806/84245	14
hsa03440	Homologous recombination	12/1014	41/8101	0.00339793	0.0615404	0.0562348	4361/11073/5893/7516/10111/79184/83990/675/8438/6117/672/4683	12
hsa05206	MicroRNAs in cancer	55/1014	310/8101	0.00419513	0.0719797	0.0657741	1021/406976/2033/406886/4893/407014/6659/406925/407006/4363/6654/442900/407036/1399/25/407010/2146/6541/7157/406900/599/387/4609/407007/23411/1789/900/407018/85414/4194/836/2475/3190/406956/648/6624/4170/1871/894/993/672/2744/3925/1786/1869/596/5579/6093/113130/10253/23405/6655/4851/5295/8660	55
hsa04022	cGMP-PKG signaling pathway	33/1014	167/8101	0.00475253	0.0774663	0.0707877	292/1388/64764/9475/293/2776/1386/387/468/3708/488/3709/7419/2982/3643/4775/4209/5530/146850/493/481/7416/10672/5294/6722/6093/2983/489/4208/2770/10105/4773/8660	33
hsa04928	Parathyroid hormone synthesis, secretion and action	23/1014	106/8101	0.00535748	0.0786493	0.0718687	1388/64764/2776/1386/860/1958/387/5567/468/3708/4041/3709/6667/4209/408/3727/10672/596/5579/2353/4208/2770/4929	23
hsa03460	Fanconi anemia pathway	14/1014	54/8101	0.00547061	0.0786493	0.0718687	5429/55120/7398/83990/4292/55215/5980/22909/675/51455/29089/6117/672/80010	14
hsa03410	Base excision repair	10/1014	33/8101	0.00554887	0.0786493	0.0718687	54107/328/5111/7374/2237/142/5427/143/55247/5426	10
hsa00970	Aminoacyl-tRNA biosynthesis	16/1014	66/8101	0.00627423	0.0852249	0.0778775	10056/1615/55157/2058/55699/4677/3376/2193/5917/51520/79731/57038/92935/51067/5859/16	16
hsa01524	Platinum drug resistance	17/1014	73/8101	0.0075531	0.0984924	0.0900011	5429/7155/4436/2956/7157/4292/5980/836/7507/7153/672/596/2950/5366/329/4217/5295	17
hsa05210	Colorectal cancer	19/1014	86/8101	0.008866	0.111166	0.101582	26060/4893/4436/6654/2956/7157/387/4609/4292/1499/836/2475/5898/596/5366/2353/6655/5295/3725	19
hsa05017	Spinocerebellar ataxia	28/1014	143/8101	0.0100257	0.121052	0.110615	9698/23369/292/6908/293/2776/11273/3708/488/5684/5695/22863/2475/3709/6667/7419/4976/55102/4800/5707/56652/7416/9821/5579/489/4217/10105/5295	28
hsa03010	Ribosome	30/1014	158/8101	0.0121391	0.141334	0.12915	11222/55173/6125/51187/6166/54460/6194/29088/6230/4736/6135/6191/65008/6202/6129/29074/6229/6206/6207/6222/6189/6164/6175/6218/6133/6227/6155/6122/6144/6154	30
hsa05163	Human cytomegalovirus infection	40/1014	225/8101	0.0129347	0.145404	0.132869	1021/4893/1388/6654/64764/811/9475/1399/7157/2776/1386/387/5567/4609/468/3708/1499/836/340061/59345/2475/5925/3709/6667/1871/4775/6892/5530/2923/10672/1869/5579/6093/1978/6655/2770/4773/5734/5295/6387	40
hsa03430	Mismatch repair	7/1014	23/8101	0.018885	0.205217	0.187524	5111/4436/2956/5983/5985/4292/6117	7
hsa04918	Thyroid hormone synthesis	16/1014	75/8101	0.0213972	0.225016	0.205617	821/1388/64764/2776/1386/5567/468/3708/7184/3709/9601/2882/8458/481/3309/5579	16
hsa05220	Chronic myeloid leukemia	16/1014	76/8101	0.0240652	0.243763	0.222748	1021/5781/4893/6654/1399/25/7157/4609/861/5925/1871/1869/867/6776/6655/5295	16
hsa00480	Glutathione metabolism	13/1014	58/8101	0.0246754	0.243763	0.222748	10314/6723/6240/6611/2937/3418/2882/4953/79017/2950/3417/27306/6241	13
hsa04919	Thyroid hormone signaling pathway	23/1014	121/8101	0.0255348	0.244834	0.223726	2033/4893/5469/7157/5567/4609/9969/9968/488/8202/23389/1499/2648/71/2475/9611/481/5579/10499/5214/489/4851/5295	23
hsa05215	Prostate cancer	19/1014	97/8101	0.0301855	0.281157	0.256917	2033/4893/6654/64764/7157/468/7184/3326/1499/2078/2475/5925/1871/3320/1869/596/2950/6655/5295	19
hsa01522	Endocrine resistance	19/1014	98/8101	0.0332213	0.29405	0.268699	4893/5469/6654/7157/5567/8202/2475/5925/6667/9611/1871/1869/596/2353/6655/4851/5295/4313/3725	19
hsa05207	Chemical carcinogenesis - receptor activation	36/1014	212/8101	0.0335327	0.29405	0.268699	23633/406886/4893/3839/1388/6654/64764/1386/5567/3841/4609/468/3838/7184/3326/2475/5925/164091/10728/993/408/2052/196/3320/1869/596/6197/5579/6776/2353/3717/1978/6655/2770/5295/3725	36
hsa04115	p53 signaling pathway	15/1014	73/8101	0.0345752	0.29405	0.268699	1021/9538/7157/900/4194/836/894/64393/596/1111/5366/983/9133/891/6241	15
hsa00250	Alanine, aspartate and glutamate metabolism	9/1014	37/8101	0.0351777	0.29405	0.268699	2746/2673/5471/790/159/2744/7915/2806/84706	9
hsa04935	Growth hormone synthesis, secretion and action	22/1014	119/8101	0.0377396	0.307578	0.281061	2033/4893/1388/6654/64764/1399/2776/1386/5567/468/3708/2475/3709/4214/5579/6776/2353/3717/6655/2770/5295/8660	22
hsa03020	RNA polymerase	8/1014	32/8101	0.0394675	0.313815	0.28676	10623/25885/221830/84172/5430/5431/5440/661	8
hsa04211	Longevity regulating pathway	17/1014	89/8101	0.0479677	0.364326	0.332916	26060/4893/1388/64764/7157/1386/5567/847/23411/468/2475/3643/5565/9821/1978/5295/8660	17
hsa03022	Basal transcription factors	10/1014	45/8101	0.0480553	0.364326	0.332916	6882/6908/2967/83860/6880/6873/51616/6872/6875/6879	10
