# Supplementary material for: Novel Prognostic Signature for Acute Myeloid Leukemia: Bioinformatics Analysis of Combined CNV-Driven and Ferroptosis-Related Genes
Source: Front Genet. 2022 Apr 26;13:849437. doi: 10.3389/fgene.2022.849437 (PMC9086455; doi:10.3389/fgene.2022.849437)
Supplement: Supplementary file 16 [file Table8.xlsx]

## Sheet: down_genes_kegg
Supplementary Table 6. Downregulated DEGs in KEGG analysis.
ID	Description	GeneRatio	BgRatio	pvalue	p.adjust	qvalue	geneID	Count
hsa04380	Osteoclast differentiation	52/1485	128/8101	2.66113e-09	8.80833e-07	6.72284e-07	8517/2215/5603/10379/5296/11025/653361/79168/2213/5595/8878/2212/208/5336/353514/54/2214/2209/7297/10326/5608/4791/3932/10990/11027/3554/2534/5971/55423/10288/1535/11006/10859/4688/207/8651/3460/814/4772/9103/2274/7305/3937/6688/11024/9021/5468/3690/4689/126014/23547/3458	52
hsa04613	Neutrophil extracellular trap formation	66/1485	190/8101	3.87248e-08	4.63957e-06	3.5411e-06	723790/8337/2215/5603/8370/5296/55766/653361/366/2357/3020/2358/5595/837/5605/2212/208/5336/54145/554313/2214/79792/83933/2209/8363/3021/820/79885/23569/8841/8347/728/1535/1378/92815/5894/10533/291/4688/207/5335/834/8970/64581/718/27180/1379/10014/9759/440689/3013/8357/3684/83740/8334/6403/3674/8338/8345/3690/4689/8351/51311/3689/7097/7099	66
hsa04145	Phagosome	56/1485	152/8101	4.20505e-08	4.63957e-06	3.5411e-06	2215/527/7277/9114/3134/653361/2213/51382/5289/2212/9146/51807/2214/53407/533/2209/155066/9554/2204/3693/3106/10312/529/6890/83547/535/715/1535/7280/8685/23480/4688/3107/64581/718/9103/929/526/6891/4481/3105/3112/1514/81027/3684/8417/3690/4689/7057/4973/11151/3689/3117/3109/7097/7099	56
hsa05131	Shigellosis	78/1485	247/8101	2.40895e-07	1.9934e-05	1.52144e-05	3611/8517/7307/102724594/6500/5603/8678/55062/5296/7335/6199/3020/10093/5595/837/7311/5289/25851/26100/8878/4671/5333/208/5336/8717/10318/64121/55072/7316/9266/10092/199746/84557/5829/643246/7323/81631/2931/3021/10398/4303/2017/9140/4793/831/3554/10627/3101/4636/3661/87/581/3059/598/9267/27128/207/5335/81858/834/10801/113026/718/81873/10095/929/29108/7100/4633/8357/92610/58484/7321/6352/29895/835…	78
hsa05144	Malaria	25/1485	50/8101	3.48741e-07	2.30866e-05	1.76206e-05	3039/3040/3043/22914/54106/958/1378/975/2995/2532/2994/100528032/1379/3383/3586/959/6383/6403/3820/7057/3689/3458/7097/4035/7099	25
hsa04640	Hematopoietic cell lineage	39/1485	99/8101	6.67327e-07	3.68142e-05	2.8098e-05	2323/4311/7850/3566/2209/926/1604/2812/3554/933/2815/1441/1378/966/925/924/951/916/100133941/1379/931/929/3112/2057/917/914/3684/1438/921/3674/930/3690/290/3575/915/928/2208/3117/3109	39
hsa05152	Tuberculosis	59/1485	180/8101	1.86569e-06	8.5924e-05	6.55804e-05	2215/5603/527/9114/2213/5595/5289/8625/2212/208/8717/4802/572/26253/2214/637/842/533/2209/4046/820/801/56848/8877/91860/10312/3687/535/1051/54106/8772/1378/581/5894/1263/207/3460/8844/2207/64581/718/1379/9103/929/64127/7096/3112/3586/23365/7421/3587/3684/11151/3689/3458/3117/3109/7097/7099	59
hsa04140	Autophagy - animal	49/1485	141/8101	2.15308e-06	8.5924e-05	6.55804e-05	11337/8897/23604/8678/55062/5296/6199/60673/11345/8837/5595/5289/26100/5566/8878/6794/5605/208/79065/64121/23710/572/84557/643246/81631/1613/9140/285973/55578/84971/5894/10533/64419/23192/598/81671/2081/207/22800/54541/64422/1514/5728/8408/23130/51100/1508/29982/6237	49
hsa04612	Antigen processing and presentation	32/1485	78/8101	2.36151e-06	8.5924e-05	6.55804e-05	10437/3310/3134/8625/4802/3303/567/926/3824/3106/6890/3305/925/3805/3804/3107/3304/3811/3802/3821/6891/3809/3812/3105/3112/1514/5721/1508/5641/3458/3117/3109	32
hsa05235	PD-L1 expression and PD-1 checkpoint pathway in cancer	35/1485	89/8101	2.59589e-06	8.5924e-05	6.55804e-05	8517/5603/27040/1460/5296/6199/5595/5605/208/5606/919/4793/5608/3932/353376/54106/55509/5894/29126/916/207/5335/3460/7535/4772/10538/116071/917/5728/5133/940/915/3458/7097/7099	35
hsa00051	Fructose and mannose metabolism	18/1485	33/8101	3.10662e-06	9.3481e-05	7.13482e-05	5372/5210/226/230/5213/5209/26007/197258/5373/29926/29925/7264/4351/3101/5208/231/2203/229	18
hsa04650	Natural killer cell mediated cytotoxicity	45/1485	131/8101	7.87135e-06	0.000217118	0.000165713	2215/27040/5296/5595/5605/5336/6452/22914/2214/637/9437/919/3824/3106/3932/3384/2534/259197/962/3002/5894/3804/5335/3460/3107/3811/117157/2207/7535/3802/4772/3821/100528032/3383/3809/3812/356/3105/7305/3937/5551/5058/3689/8743/3458	45
hsa00520	Amino sugar and nucleotide sugar metabolism	22/1485	49/8101	1.62756e-05	0.000414402	0.000316287	5372/80896/51005/55577/51706/2582/1118/2584/54187/3073/197258/5373/29926/29925/7264/4351/3101/5973/51700/51167/5236/3074	22
hsa05150	Staphylococcus aureus infection	35/1485	96/8101	1.8666e-05	0.000441318	0.00033683	2215/2213/2357/1667/2358/728358/2212/720/2214/25984/721/2209/820/2204/1668/728/715/3861/718/1669/9103/3383/713/3112/3860/3586/3684/712/717/6403/714/3689/3117/3109/719	35
hsa04666	Fc gamma R-mediated phagocytosis	35/1485	97/8101	2.41377e-05	0.000532639	0.00040653	2215/27040/5296/100137049/6199/3985/653361/2213/10093/5595/2212/208/5336/1785/5338/10092/2214/2209/7408/56848/8877/274/1072/8398/5894/207/3055/5335/8605/4082/81873/10095/2934/5058/273	35
hsa04136	Autophagy - other	16/1485	32/8101	4.62642e-05	0.000957091	0.000730487	11337/8678/55062/60673/11345/5289/26100/79065/23710/9140/285973/84971/10533/23192/64422/23130	16
hsa04142	Lysosome	42/1485	128/8101	5.4043e-05	0.00105225	0.000803116	968/1201/8907/527/9114/10239/6556/22901/4758/1512/6448/9516/54/57192/533/3073/26088/2629/10312/2588/967/535/3482/1212/1203/10577/1075/6609/8692/410/8906/4864/285362/1514/8120/1508/5641/3074/20/1777/2548/6272	42
hsa04064	NF-kappa B signaling pathway	35/1485	104/8101	0.000125441	0.00230672	0.00176057	8517/27040/1460/8837/5336/8717/4050/4049/8740/7329/4616/4791/3932/353376/2919/3554/5971/10912/958/7185/598/6351/597/5335/4055/7535/3383/929/1647/9560/115650/959/23643/84433/7099	35
hsa05340	Primary immunodeficiency	17/1485	38/8101	0.000157177	0.00273819	0.00208989	8517/8625/926/3932/6890/23495/958/925/916/7535/6891/115650/959/973/930/3575/915	17
hsa04662	B cell receptor signaling pathway	29/1485	82/8101	0.000176756	0.00292531	0.0022327	8517/5296/11025/79168/2213/5595/8519/5605/208/5336/353514/4793/10990/11027/933/971/10288/11006/5894/975/10859/207/4772/973/11024/930/974/23547/84433	29
hsa05332	Graft-versus-host disease	18/1485	42/8101	0.000197945	0.00311999	0.00238129	3134/3824/3106/3002/3804/3107/3811/3802/3821/3812/356/3105/3112/5551/940/3458/3117/3109	18
hsa04144	Endocytosis	69/1485	252/8101	0.000214619	0.00322904	0.00246452	29082/3577/11267/3310/84440/4087/29924/3134/60682/3579/27243/2869/9744/10093/5590/10938/409/51160/5662/9146/56904/93343/1785/119016/9266/5338/10092/2352/9798/116988/64411/3303/116985/100287171/23327/79720/23550/274/22905/50855/3106/3305/3482/1212/7251/160/51652/6642/2870/9267/55738/27128/1175/26056/3107/3304/81873/10095/8766/381/9922/2350/3105/11031/51100/26119/3560/64744/273	69
hsa05134	Legionellosis	22/1485	57/8101	0.000254667	0.00354826	0.00270817	1937/3310/4671/842/3303/9554/4791/2919/3305/1378/3304/834/718/1379/929/29108/7100/3684/58484/3689/7097/7099	22
hsa04137	Mitophagy - animal	26/1485	72/8101	0.000257276	0.00354826	0.00270817	11337/8678/65018/1460/7942/11345/7311/8878/9958/79065/23710/7316/84557/643246/81631/10133/285973/7030/89941/79735/598/51024/22800/8408/6237/7314	26
hsa05132	Salmonella infection	67/1485	249/8101	0.000449647	0.00595333	0.00454381	8517/3831/6500/5603/11258/7277/10093/5595/837/5289/4671/10540/5605/208/8717/5606/1785/9842/51807/89953/9266/10092/83658/79792/65082/11035/10398/5608/83547/8677/197259/6993/54106/838/8772/10627/64601/4636/581/5894/51176/26999/9267/7280/6932/27128/147700/302/207/399/834/81873/10095/929/29108/7100/4633/81027/58484/5058/29895/23643/6281/6237/8743/7097/7099	67
hsa05322	Systemic lupus erythematosus	41/1485	136/8101	0.000510842	0.00650341	0.00496365	723790/8337/2215/8370/55766/3020/2212/54145/554313/720/2214/721/2209/8363/3021/8347/715/958/92815/87/8970/718/440689/713/3112/3586/3013/8357/959/83740/940/712/717/8334/8338/8345/714/8351/3458/3117/3109	41
hsa05170	Human immunodeficiency virus 1 infection	58/1485	212/8101	0.000680833	0.00834651	0.00637037	8517/6500/5603/8907/5296/3134/6199/3985/5595/200315/2793/5605/208/5336/8717/5606/572/6921/60489/2790/637/842/5829/2783/919/567/801/5608/54331/91860/3106/1072/6890/8772/3661/581/5894/9616/598/10681/916/207/5335/3107/4772/8906/6891/356/3105/917/7133/2791/6923/5058/9582/915/7097/7099	58
hsa04066	HIF-1 signaling pathway	34/1485	109/8101	0.000765185	0.00904558	0.00690393	112398/5296/6199/5595/1977/5605/208/5336/226/9470/6921/230/5213/5209/112399/2027/8569/3162/2064/3101/207/5335/3460/4055/7422/2026/2872/6923/1027/6513/7076/229/3458/7099	34
hsa05142	Chagas disease	32/1485	102/8101	0.000968448	0.0110537	0.00843657	8517/4087/5603/5296/8837/5595/5520/208/2774/55844/919/2778/54106/8772/5521/916/207/3460/718/356/713/917/3586/712/6348/6352/714/915/6349/3458/7097/7099	32
hsa04621	NOD-like receptor signaling pathway	51/1485	184/8101	0.00102064	0.0111773	0.0085309	8517/11337/5603/10379/10135/11345/1667/5595/728358/837/2634/4671/9051/23710/55072/84557/643246/79792/81631/4210/171389/11035/114769/7297/820/9140/4793/1668/2919/838/8772/1535/10910/3661/598/81858/834/2633/1669/4938/3665/115362/22861/9447/64127/29108/91662/1508/58484/6352/7099	51
hsa05169	Epstein-Barr virus infection	55/1485	202/8101	0.00104681	0.0111773	0.0085309	8517/5700/5603/5719/10379/5296/3134/208/5336/8717/5606/637/842/919/567/4616/7297/4793/5608/4791/7979/3106/6890/5710/5971/10912/896/8772/958/3280/3661/581/953/916/207/79685/10018/3107/9861/4938/3665/3383/6891/1647/3105/3112/917/1027/9636/930/915/2208/3117/3109/7097	55
hsa04061	Viral protein interaction with cytokine and cytokine receptor	31/1485	100/8101	0.00143428	0.0145572	0.0111106	3577/8794/3579/8807/643/4049/8740/8764/2919/8809/11009/1232/6351/5196/4055/5197/9560/3586/1236/7133/3587/6846/6358/6348/6352/6375/3560/5473/1230/8743/6349	31
hsa00190	Oxidative phosphorylation	39/1485	134/8101	0.00145132	0.0145572	0.0111106	126328/4704/4701/6391/51079/374291/527/4714/4696/9114/4729/10476/51382/10063/518/4708/4728/1327/533/155066/4718/64077/1337/539/6389/9551/10312/529/535/10975/4707/4695/9167/516/514/521/513/526/1339	39
hsa04371	Apelin signaling pathway	40/1485	139/8101	0.00160645	0.0147886	0.0112872	4207/4087/8678/6199/5595/5289/5566/2793/5605/208/5571/196883/100271849/84557/2790/4635/643246/81631/2783/801/56848/8877/23533/54331/91860/5894/10681/6546/207/814/22800/10014/9759/4638/4633/2791/59/6696/4634/6237	40
hsa04062	Chemokine signaling pathway	52/1485	192/8101	0.0016077	0.0147886	0.0112872	8517/3577/5296/3579/653361/2869/58191/5595/5590/5566/409/2793/643/208/5336/196883/572/5908/2790/5829/2783/2931/4793/23533/54331/2919/1232/5894/3702/10681/2870/6351/5196/207/3055/5335/5197/2268/5906/10663/9560/1236/2791/6846/6358/5058/6348/6352/6375/5473/1230/6349	52
hsa05133	Pertussis	25/1485	76/8101	0.00160843	0.0147886	0.0112872	5603/5595/720/721/801/3659/91860/1072/353376/715/3661/834/718/929/713/29108/3586/3684/712/717/722/714/23643/3689/7099	25
hsa05417	Lipid and atherosclerosis	57/1485	215/8101	0.0016949	0.0151625	0.0115726	8517/7494/3310/5603/6648/5296/4318/653361/5595/6256/208/5606/572/5908/637/842/3303/142678/801/5608/91860/353376/2919/3305/958/1535/3661/581/598/9138/2081/4688/207/5335/3304/834/9619/4772/5906/3665/3383/929/356/29108/959/6403/6348/5468/6352/4689/4973/23643/1649/8743/6349/7097/7099	57
hsa05330	Allograft rejection	15/1485	38/8101	0.00183865	0.0160156	0.0122237	3134/3106/958/3002/3107/356/3105/3112/3586/959/5551/940/3458/3117/3109	15
hsa05140	Leishmaniasis	25/1485	77/8101	0.00197536	0.0164822	0.0125798	2215/5603/653361/5595/2212/2214/2209/4793/1535/1378/4688/3460/718/1379/9103/3112/3586/3684/4689/3689/3458/3117/3109/7097/7099	25
hsa05321	Inflammatory bowel disease	22/1485	65/8101	0.00199181	0.0164822	0.0125798	4087/8807/3566/8809/50615/30009/3460/6775/4094/4772/3594/64127/3112/7100/3586/2625/6095/3458/3117/3109/7097/7099	22
hsa05167	Kaposi sarcoma-associated herpesvirus infection	52/1485	194/8101	0.00205261	0.016571	0.0126476	8517/5603/10379/8678/5296/3134/5595/7311/5289/2793/5605/208/5336/8717/7316/84557/2790/637/842/643246/81631/2783/7297/801/5608/23533/54331/91860/3106/2919/8772/1232/3661/581/5894/51176/10681/6932/207/3055/5335/3107/718/4772/7422/3665/3383/3105/64422/2791/1230/7314	52
hsa04659	Th17 cell differentiation	32/1485	108/8101	0.00273287	0.0215376	0.0164383	8517/4087/5603/27040/5595/6256/3566/919/5914/7297/4793/3932/3554/50615/30009/246778/916/5335/3460/7535/4772/3594/3112/917/2625/6095/3560/915/3556/3458/3117/3109	32
hsa04660	T cell receptor signaling pathway	31/1485	104/8101	0.00285224	0.0216297	0.0165086	8517/5603/27040/5296/5595/9402/5605/208/919/926/4793/3932/2534/5894/3702/925/916/207/5335/7535/4772/3937/917/3586/959/5133/940/5058/915/84433/3458	31
hsa05012	Parkinson disease	67/1485	266/8101	0.00287524	0.0216297	0.0165086	7494/5715/3831/126328/4704/4701/135/6391/51079/5700/374291/5719/65018/4714/4696/7277/4729/5683/5687/10476/7311/5566/27429/2774/518/51807/7316/4708/89953/4728/1327/842/55630/118424/2778/801/5413/4718/1337/539/91860/6389/7979/6622/10975/5710/581/120892/291/598/4707/7280/4695/2081/147700/5335/9167/9861/516/514/91252/513/81027/4128/1649/1339/7314	67
hsa03320	PPAR signaling pathway	24/1485	75/8101	0.00298746	0.0219744	0.0167717	3611/30/2710/1375/440503/6256/2180/7316/729359/10998/23305/5467/2181/1593/6342/8309/51/2167/5468/4973/123/345/2168/336	24
hsa05323	Rheumatoid arthritis	28/1485	93/8101	0.00380576	0.0273849	0.0209012	527/9114/51382/4050/54/533/155066/8741/10312/529/2919/535/3600/7422/3383/526/3112/1514/940/6348/6352/3689/6349/3458/3117/3109/7097/7099	28
hsa04217	Necroptosis	43/1485	159/8101	0.00401974	0.0282744	0.0215801	29082/723790/8337/10379/2495/100137049/81030/55766/27243/8837/8878/8717/2512/55072/637/11035/7297/353376/197259/8772/124044/51652/92815/581/291/5837/6609/3460/81858/834/8605/6775/356/29108/3013/83740/8334/5836/8338/2752/8743/3458/7099	43
hsa04610	Complement and coagulation cascades	26/1485	85/8101	0.00410021	0.0282744	0.0215801	720/2153/7056/5265/721/1604/728/3687/715/2157/1191/5329/1378/2161/966/718/1379/713/3684/712/717/722/714/3689/11326/719	26
hsa04216	Ferroptosis	15/1485	41/8101	0.0043637	0.0294772	0.0224981	2495/5094/2512/2180/84557/643246/81631/10162/112483/3162/23305/10533/2181/6303/6520	15
hsa05145	Toxoplasmosis	32/1485	112/8101	0.00505547	0.0334672	0.0255434	8517/3310/5603/5595/208/5606/572/842/3303/7297/4793/5608/23533/3305/958/240/598/207/8651/3460/3304/3914/3112/3586/959/3587/23643/3458/3117/3109/7097/7099	32
hsa05016	Huntington disease	74/1485	306/8101	0.00543253	0.0345893	0.0263998	5435/5715/548644/3831/126328/4704/4701/6391/51079/5700/374291/5719/6648/8678/11258/4714/55062/4696/7277/4729/9519/60673/5683/5687/10476/27113/5289/8632/26100/9586/10540/518/246721/51807/4708/89953/5439/4728/1327/842/6804/5438/5434/2878/4718/1337/539/6389/7979/10975/5710/1212/4294/160/581/291/4707/7280/4695/2081/147700/1175/9167/9861/516/514/7052/513/81027/8408/23130/5468/29982/1339	74
hsa05162	Measles	38/1485	139/8101	0.00543397	0.0345893	0.0263998	8517/3310/10379/1460/5296/4600/2213/27113/208/8717/572/637/842/3303/7297/4793/3305/896/54106/8772/3661/581/598/6504/916/207/3304/4938/3665/4599/356/917/1027/940/3560/915/7097/7099	38
hsa04625	C-type lectin receptor signaling pathway	30/1485	104/8101	0.00560497	0.0350046	0.0267168	8517/5603/10379/5296/5595/208/5336/26253/602/4046/801/3659/91860/4791/5971/5894/1263/207/8844/834/2207/64581/4772/22800/338339/29108/3586/23365/5058/6237	30
hsa05208	Chemical carcinogenesis - reactive oxygen species	56/1485	223/8101	0.00651103	0.0394844	0.030136	8517/126328/4704/4701/6391/51079/374291/5603/6648/4714/5296/4696/4729/653361/4259/10476/5595/5605/208/518/65010/4708/572/5338/4728/1327/2053/4718/25865/1337/539/6389/10975/3162/2946/2948/1535/5894/291/4707/4695/4688/207/9167/516/514/1645/7422/513/5728/2947/5795/1545/1646/1339/2944	56
hsa04210	Apoptosis	37/1485	136/8101	0.00656085	0.0394844	0.030136	56616/8517/5296/7277/8837/5595/27113/1512/27429/5605/208/8717/51807/572/637/842/5414/4616/10912/8772/7185/3002/581/5894/598/2081/1075/207/597/10018/356/1647/1514/1508/5551/1649/8743	37
hsa04370	VEGF signaling pathway	19/1485	59/8101	0.0072232	0.0426943	0.0325859	5603/5296/100137049/5595/5605/208/5336/572/842/5829/56848/8877/5894/207/5335/8605/9047/7422/3315	19
hsa05020	Prion disease	66/1485	273/8101	0.00840101	0.0487848	0.0372344	5715/3831/126328/4704/4701/6391/51079/3310/5700/374291/5603/5719/4714/1460/5296/4696/7277/4729/653361/5683/5687/10476/5595/5566/9586/518/51807/4708/572/89953/4728/1327/842/3303/4718/1337/539/6389/7979/2534/10975/5710/3305/1535/581/291/4707/7280/4695/4688/147700/9167/9861/3304/516/514/513/713/81027/712/6352/4684/4689/714/1649/1339	66
hsa05211	Renal cell carcinoma	21/1485	69/8101	0.00992504	0.0566412	0.0432307	112398/5296/5595/5605/208/572/6921/5908/201163/112399/7030/7039/5894/207/2034/7422/5906/6923/6513/5058/2113	21
hsa04620	Toll-like receptor signaling pathway	29/1485	104/8101	0.0105523	0.0585188	0.0446637	8517/5603/5296/5595/5605/208/5606/54472/5608/353376/54106/8772/958/3661/6351/207/3665/929/7096/9560/7100/6348/6352/23643/51311/6696/6349/7097/7099	29
hsa04060	Cytokine-cytokine receptor interaction	70/1485	295/8101	0.0106076	0.0585188	0.0446637	3577/8794/9235/3579/8807/3603/58191/643/4050/51330/3557/7850/3566/8742/943/4049/8740/8764/8741/2919/3554/8809/939/23495/958/84957/1441/3600/11009/1232/50615/6351/246778/5196/3460/4055/5197/8718/10663/3594/356/9560/2057/5008/3586/1236/115650/7133/959/3587/8784/1438/6846/6358/944/6348/9518/6352/6375/3560/5473/3575/3556/9173/1230/7293/8743/6349/3458/3976	70
hsa00604	Glycosphingolipid biosynthesis - ganglio series	7/1485	15/8101	0.0111731	0.0602794	0.0460075	3073/8705/256435/30815/27090/3074/6483	7
hsa01250	Biosynthesis of nucleotide sugars	13/1485	37/8101	0.011291	0.0602794	0.0460075	5372/55577/2582/2584/54187/197258/5373/29926/29925/7264/4351/3101/5236	13
hsa04932	Non-alcoholic fatty liver disease	40/1485	155/8101	0.0123608	0.0647551	0.0494235	7494/126328/4704/4701/6391/51079/374291/5603/4714/5296/4696/4729/6256/208/5571/4708/4728/1327/637/2931/6945/4718/1337/6389/10975/4296/581/4707/51094/4695/2081/207/10018/9167/6720/356/9021/5468/1649/1339	40
hsa04658	Th1 and Th2 cell differentiation	26/1485	92/8101	0.0125206	0.0647551	0.0494235	8517/5603/27040/5595/3566/919/7297/4793/3932/30009/916/5335/3460/6775/4094/7535/4772/3594/3112/917/2625/3560/915/3458/3117/3109	26
hsa00030	Pentose phosphate pathway	11/1485	30/8101	0.0136165	0.0693392	0.0529223	226/132158/230/5213/7086/25796/5236/2539/8277/2203/229	11
hsa04979	Cholesterol metabolism	16/1485	50/8101	0.0139733	0.0700784	0.0534864	10948/9217/4043/9218/10577/1593/4864/706/26119/341/345/6272/350/348/4035/336	16
hsa05166	Human T-cell leukemia virus 1 infection	54/1485	222/8101	0.0142368	0.0703339	0.0536814	8517/2874/246184/4087/5296/3134/9519/25906/51529/5595/8498/5566/9586/5605/208/10524/8379/7850/196883/4049/567/2224/4791/3106/3932/3554/5971/896/958/3600/581/291/598/5423/916/207/3107/4055/4772/3383/706/3105/3112/917/6688/5728/115650/6513/3560/915/3689/2113/3117/3109	54
hsa04940	Type I diabetes mellitus	14/1485	43/8101	0.0178082	0.0863223	0.0658844	3134/4049/3106/3002/5798/3107/356/3105/3112/5551/940/3458/3117/3109	14
hsa00760	Nicotinate and nicotinamide metabolism	12/1485	35/8101	0.0179947	0.0863223	0.0658844	51547/55191/22933/10135/54981/65220/23410/51548/683/30833/93100/4837	12
hsa05416	Viral myocarditis	18/1485	60/8101	0.0188783	0.0892672	0.0681321	3134/637/842/1604/3106/2534/958/3107/3383/3105/3112/959/5551/940/4625/3689/3117/3109	18
hsa05135	Yersinia infection	35/1485	137/8101	0.0213643	0.0995998	0.0760183	8517/5603/27040/5296/10093/5595/5605/2212/208/5606/10092/5829/4210/926/5608/10458/3932/3661/925/9138/207/5335/834/6195/7535/4772/81873/10095/29108/3937/3586/23365/58484/2335/7099	35
hsa04215	Apoptosis - multiple species	11/1485	32/8101	0.0226124	0.103954	0.0793416	56616/8678/27113/27429/637/842/5414/8772/581/598/10018	11
hsa00120	Primary bile acid biosynthesis	7/1485	17/8101	0.0240942	0.109249	0.0833828	10005/10998/23600/1593/6342/8309/80270	7
hsa05163	Human cytomegalovirus infection	53/1485	225/8101	0.0272296	0.121202	0.0925059	8517/5603/5296/3134/6199/3579/5595/5566/9586/2793/5605/208/8717/196883/2790/637/842/5829/2783/567/2778/801/5608/54331/91860/3106/6890/3554/8772/1232/3661/581/5894/10681/9138/6351/207/3107/4772/7422/6891/356/3105/9560/23365/2791/3587/9826/6348/6352/3690/1230/6349	53
hsa05213	Endometrial cancer	17/1485	58/8101	0.0276476	0.121202	0.0925059	3611/5296/5595/5605/208/572/842/4616/10912/2064/581/5894/51176/6932/207/1647/5728	17
hsa04514	Cell adhesion molecules	37/1485	149/8101	0.0280216	0.121202	0.0925059	3134/3385/4359/926/7122/3106/3384/23308/933/958/923/10666/9080/64115/201633/925/29126/3107/3383/3105/3112/959/914/6383/3684/64101/5133/940/6403/4684/3695/3689/6402/3117/3109/84628/1462	37
hsa04130	SNARE interactions in vesicular transport	11/1485	33/8101	0.0284603	0.121202	0.0925059	9570/9482/6810/6809/53407/6804/9554/8773/10490/8417/10791	11
hsa04668	TNF signaling pathway	29/1485	112/8101	0.0286883	0.121202	0.0925059	8517/5603/5296/4318/8837/5595/9586/208/8717/5606/4049/602/11035/3659/5608/2919/197259/1051/8809/8772/7185/3600/207/3383/64127/7133/9021/6352/3976	29
hsa05221	Acute myeloid leukemia	19/1485	67/8101	0.0289274	0.121202	0.0925059	8517/5296/6199/5595/5605/208/572/2209/5914/5467/5894/51176/6932/207/597/929/6688/3684/1053	19
hsa04068	FoxO signaling pathway	33/1485	131/8101	0.0301493	0.124611	0.0951074	11337/5603/6648/5296/11345/5595/1032/6794/5605/208/5571/23710/114907/604/4616/4303/9140/26260/10912/5894/6446/1263/207/10018/1901/356/1647/3586/5728/1027/3575/8743/8698	33
hsa05110	Vibrio cholerae infection	15/1485	50/8101	0.0304938	0.124611	0.0951074	527/9114/51382/5566/5336/533/155066/2778/10312/529/535/23480/5335/526/3784	15
hsa04664	Fc epsilon RI signaling pathway	19/1485	68/8101	0.0334743	0.135122	0.10313	5603/27040/5296/100137049/5595/5605/208/5336/5606/241/5608/2534/240/5894/207/5335/8605/2207/3937	19
hsa04910	Insulin signaling pathway	34/1485	137/8101	0.0343879	0.137137	0.104668	5296/6199/5261/5595/5590/1977/5566/5605/79660/208/9470/10211/5571/572/10603/801/8569/91860/3632/3101/5894/5837/207/8651/9322/5575/2872/6720/5256/5836/9021/5509/2203/2319	34
hsa05203	Viral carcinogenesis	48/1485	204/8101	0.0349122	0.137571	0.104999	8517/5700/10379/8370/5296/9114/3134/9519/2968/5595/728340/5566/9586/8717/54145/6672/8379/554313/572/5829/83933/8363/79885/8841/4791/8347/3106/2966/896/7185/2958/1232/3661/87/581/5423/3107/4055/8970/718/10014/3665/9759/440689/3105/1027/2934/8345	48
hsa05014	Amyotrophic lateral sclerosis	80/1485	364/8101	0.0404828	0.157645	0.12032	7494/5715/3831/126328/4704/4701/6391/51079/5700/374291/5603/5719/8678/65018/11258/4714/55062/4696/7277/4729/9782/60673/5683/5687/10476/9217/311/5289/8632/26100/8878/10540/518/5606/51807/4708/572/89953/4728/84557/1327/637/283/842/643246/81631/2878/4718/10133/5608/1337/539/6389/7979/3084/10975/5710/581/400916/598/4707/7280/4695/2081/147700/9167/9861/834/8021/516/514/513/9973/81027/7133/8408/23130/2…	80
hsa00730	Thiamine metabolism	6/1485	15/8101	0.0417871	0.160832	0.122753	249/203/9054/84284/27010/79178	6
hsa00590	Arachidonic acid metabolism	17/1485	61/8101	0.0437436	0.166427	0.127023	100137049/4051/2678/2053/2878/151056/8398/4056/240/11145/6916/8605/9536/4048/5730/5320/247	17
hsa00052	Galactose metabolism	10/1485	31/8101	0.0446062	0.167349	0.127727	2582/5213/2584/8972/3101/231/130589/5236/93432/2548	10
hsa05165	Human papillomavirus infection	73/1485	331/8101	0.0454615	0.167349	0.127727	8517/5700/10379/527/5296/9114/3134/4600/9519/6199/5527/5595/5590/51382/5566/9586/5520/5605/28227/208/8717/55844/5526/572/8638/5829/533/7297/155066/2778/3659/50855/3693/3106/10312/529/535/896/8772/3280/5986/3661/581/5894/3993/5521/1299/7480/6932/7148/207/3107/1292/7422/4599/526/356/3914/3105/5728/3955/3679/1027/10474/9636/3674/2335/3690/3695/7057/55502/1298/6696	73
hsa04966	Collecting duct acid secretion	9/1485	27/8101	0.0455028	0.167349	0.127727	527/9114/51382/155066/10312/529/535/526/6521	9
hsa05320	Autoimmune thyroid disease	15/1485	53/8101	0.0495507	0.180234	0.137561	3134/3106/958/3002/7038/3107/356/3105/3112/3586/959/5551/940/3117/3109	15
